# Supplementary material for: Controlling stereochemistry in polyketide synthesis: 1,3- vs. 1,2-asymmetric induction in methyl ketone aldol additions to β-super siloxy aldehydes
Source: Royal Society of Chemistry journal article supplement (doi:10.1039/c3sc51183a), 2013-01-01
Supplement: c3sc51183a.pdf [file c3sc51183a.pdf]

## Supporting Information

### Controlling Stereochemistry in Polyketide Synthesis: 1,3- vs. 1,2-Asymmetric Induction in Methyl Ketone Aldol Additions to $\beta$ -Super Siloxy Aldehydes

Patrick B. Brady, Brian J. Albert, Matsujiro Akakura and Hisashi Yamamoto\*

Department of Chemistry, University of Chicago, 5735 S. Ellis Ave. Chicago, IL, 60637 USA  
yamamoto@uchicago.edu

#### Table of Contents

|                                                                                                |      |
|------------------------------------------------------------------------------------------------|------|
| Synthetic Efficiency of Super Silyl Cascade Aldol Approach to Polyketides                      | S1   |
| Computational Methods                                                                          | S4   |
| Computational Data for Enolborinate Addition to $\beta$ -Super Siloxy Butanal                  | S5   |
| Computational Data for Enolborinate Addition to $\alpha$ -Methyl $\beta$ -Super Siloxy Butanal | S9   |
| General Experimental Information                                                               | S33  |
| Synthetic Procedures, Stereochemical Assignment and Data for Compounds 1                       | S34  |
| Synthetic Procedures and Data for Compounds 2                                                  | S37  |
| Synthetic Procedures, Stereochemical Assignment and Data for Compounds 3                       | S38  |
| Synthetic Procedures, Stereochemical Assignment and Data for Compounds 5                       | S42  |
| Synthetic Procedures, Stereochemical Assignment and Data for Compounds 6                       | S46  |
| Synthetic Procedures, Data for Compounds 8-12                                                  | S52  |
| Stereochemical Assignment for compounds 9-14                                                   | S55  |
| Synthetic Procedures, Stereochemical Assignment and Data for Compounds 15-18                   | S57  |
| Additional Data for Equations 3 – 5                                                            | S59  |
| Synthetic Procedures and Data for Compounds 20-22                                              | S62  |
| Stereochemical Assignment for Compounds 20-22                                                  | S66  |
| Synthetic Procedures, Stereochemical Assignment and Data for Compounds 25-34                   | S69  |
| Data for Compounds SI-3, SI-5a, SI-5b                                                          | S76  |
| $^1\text{H}$ and $^{13}\text{C}$ NMR Spectra                                                   | S76  |
| X-Ray Diffraction Data for Compound SI-9                                                       | S174 |

#### Synthetic Efficiency

The development of new, more efficient synthetic methods is an ongoing challenge in contemporary organic chemistry.<sup>1</sup> The evaluation of synthetic efficiency has been discussed at great length in the literature, and numerous metrics have been defined. In our studies, we have evaluated the synthetic efficiency of the super silyl cascade aldol approach to polyketides in comparison to alternative methods. We have chosen four metrics to evaluate synthetic efficiency: 1) chemical yield (the most elementary metric) 2) stereoselectivity 3) atom economy 4) step economy (the most important metric).

To evaluate atom economy<sup>2,3</sup> of the super silyl aldol approach to polyketides, selected examples were compared to literature preparation of similar compounds using

<sup>1</sup> See refs. 1–3, 11,12,15 in main text.

<sup>2</sup> Trost, B. M. *Angew. Chem. Int. Ed. Engl.* **1995**, *34*, 259–281

different strategies. To calculate atom economy for a single synthetic transformation, equation (S-1) was used, according to Eissen and coworkers.<sup>4</sup>

$$\text{atom economy (AE)} = \frac{b_{\text{product}} \times \text{MW}_{\text{product}}}{a_{\text{substrate 1}} \times \text{MW}_{\text{substrate 1}} + \dots + a_{\text{substrate m}} \times \text{MW}_{\text{substrate m}}} \quad (\text{eq. S-1})$$

Where MW is molecular weight, and *a* and *b* are coefficients relating to the stoichiometry and ratios of reagents used. To evaluate atom-economy for a multistep synthesis with *n* steps, equation (S-2) was used.

$$\text{AE}(1, \dots, n) = \frac{b_{\text{product}} \times \text{MW}_{\text{product}}}{\frac{a_{\text{substrate 1}} \times \text{MW}_{\text{substrate 1}}}{\text{AE}(1, \dots, n-1)} + \sum_{j=2}^m a_{\text{substrate } j} \times \text{MW}_{\text{substrate } j}} \quad (\text{eq. S-2})$$

Where substrate<sub>1</sub> is the substrate in the final step of the reaction, and *n-1* is synthetic step proceeding the final step in the multistep sequence. Our calculations for this discussion include reagents involved in each reaction, adjusting for the reagent stoichiometry *a* or *b* in equations 1, 2. However, solvents, reagents used for workup and purification are not included.

**Scheme S-1** shows the aldol reaction of Roche aldehyde **S-1a** with propanal-derived enolsilane **E-23**. Product **S-2** can be isolated in good yield and high selectivity. Unlike many aldol reactions, this variation results in perfect atom economy, due extremely low catalyst loading, transfer of the silyl group to the product and absence of exogenous Lewis acids, bases, or additives. The atom economic impact of the silyl group is only realized upon deprotection (see below). As shown in Scheme 5, of the main text, **3** can be used in a one-pot acetone addition, generating product **20d**.

#### Scheme S-1

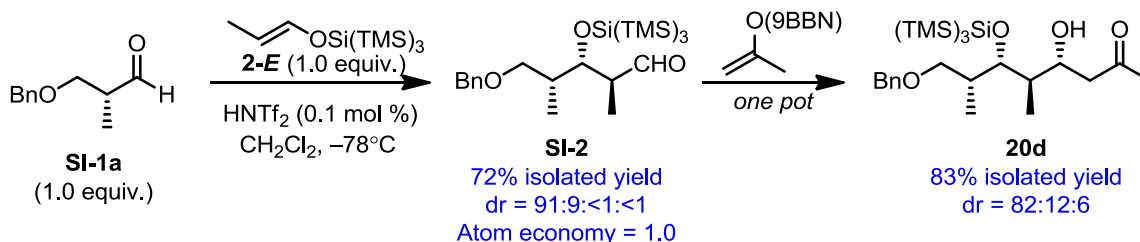

**Scheme S-2** Shows published methods for the synthesis of crotyl product **S-3** with equivalent stereochemistry.<sup>5,6,7</sup> As can be seen, the atom economy of this reaction is rather poor, due to the requirement of high molecular weight chiral crotyl donors required

<sup>3</sup> Trost, B. M. *Science* **1991**, *254*, 1471–1477.

<sup>4</sup> Eissen, M.; Mazur, R.; Quebbemann, H.-G.; Pennemann, K.-H. *Helv. Chim. Acta* **2004**, *87*, 524–535.

<sup>5</sup> Brown, H. C.; Bhat, K. S.; Randad, R. S. *J. Org. Chem.* **1989**, *54*, 1570–1576.

<sup>6</sup> Kim, H.; Ho, S.; Leighton, J. L. *J. Am. Chem. Soc.* **2011**, *133*, 6517–6520.

<sup>7</sup> Roush, W. R.; Ando, K.; Powers, D. B.; Halterman, R. L.; Palkowitz, A. D. *Tetrahedron Lett.* **1988**, *29*, 5579–5582.

for high selectivity. Furthermore, as evidenced in synthetic studies on Rutamycin B,<sup>8</sup> protection and oxidation steps are required to convert crotyl product **S-3** to aldehyde **S-4** (functional equivalent of **S-2**). The overall yield is 45% over three steps, and the calculated atom economy is 0.22.<sup>9</sup> When comparing the synthesis of **S-2** and **S-4**, the super silyl aldol route is more efficient in terms of four metrics: chemical yield, selectivity, step economy, and atom economy.

### Scheme S-2.

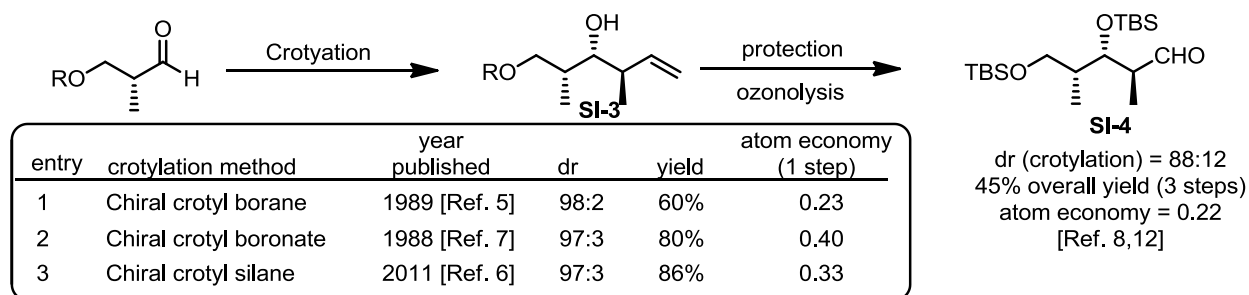

If the less functionalized crotyl product **SI-3** is desired instead, **SI-2** could be converted to **S-3a** by a two step olefination/deprotection sequence (**Scheme S-3**). If photolysis is used to cleave the super silyl group, the atom economy for the 3-step sequence is expected to be 0.26. If TBAF is used for desilylation, the atom economy will be 0.20, both of which are comparable to crotylation methods in **S-2**. If **S-3** is desired, the super silyl approach would still be advantageous in that no expensive chiral reagent is required.

### Scheme S-3. Conversion of SI-2 to SI-3a

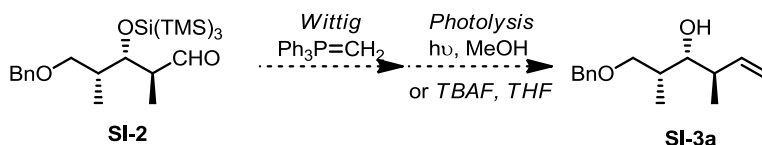

The 2,3,4-*syn-syn* configured dipropionate stereotriad is also found in natural products. This stereochemical configuration can be accessed by aldol addition of **Z-23** and aldehyde **SI-1**, affording benzyl protected product **SI-5a** in good dr or TBS-protected **SI-5b** in excellent dr. The synthesis of functionally equivalent compounds has been reported in the total synthesis of Tedanolide<sup>10</sup> and Discodermolide.<sup>11</sup> The use of crotylboration or Evans' aldol reaction requires a greater number of steps, is lower yielding and has poor atom economy.

<sup>8</sup> White, J. D.; Hanselmann, R.; Jackson, R. W.; Porter, W. J.; Ohba, Y.; Tiller, T.; Wang, S. *J. Org. Chem.* **2001**, *66*, 5217–5231.

<sup>9</sup> Due to lack of experimental data the following assumptions were made for the 3 step sequence: step 1) **S-1a** (1equiv.) crotylboronate (1.2 equiv.); step 2: TBSOTf (1.3 equiv.), Et<sub>3</sub>N (1.5 equiv.); step 3: O<sub>3</sub> (1 equiv. counted), DMS (10 equiv.)

<sup>10</sup> De Lemos, E. *et al. Chem. Eur. J.* **2008**, *14*, 11092–11112.

<sup>11</sup> Hassfeld, J.; Eggert, U.; Kalesse, M. *Synthesis* **2005**, 1183–1199.

### Scheme S-4: Synthesis of *syn-syn* configured dipropionates:

#### a. Super silyl propanal aldol approach

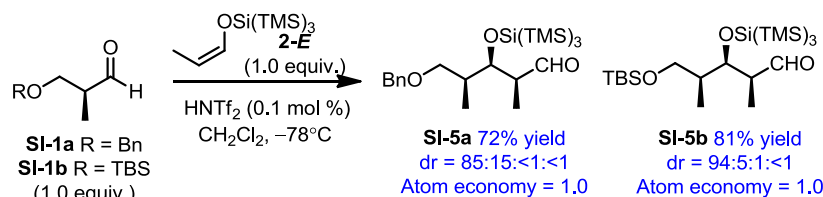

#### b. Crotylation Approach en route to Tedanolide [Ref. 10]

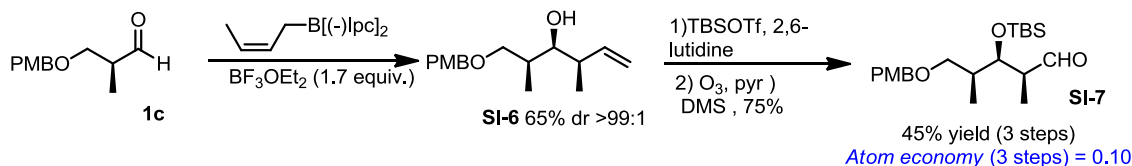

#### c. Evans aldol approach en route to Discodermolide [Ref. 11]

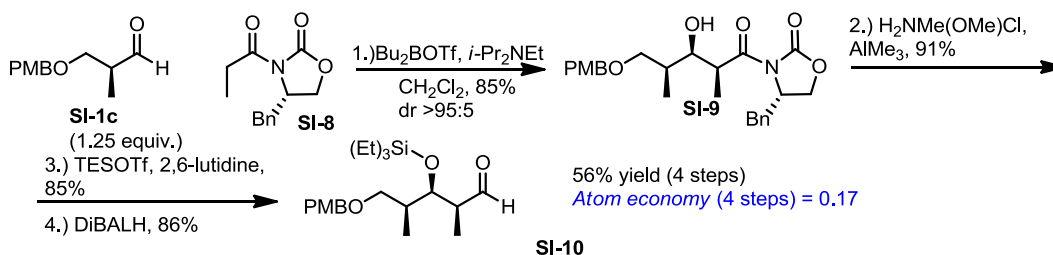

In summary, quantitative analysis the synthetic efficiency of the super silyl aldol approach to polyketides demonstrates that it is highly efficient when compared to the state of the art in stereoselective synthesis. Although at first glance this strategy may appear to be atom-inefficient due to the use of larger than usual silyl groups, qualitative analysis demonstrates that it is actually more atom-economical than alternative methods. It is also more efficient in terms of chemical yield (the simplest efficiency metric), step economy, and is comparable in terms of stereoselectivity. **Scheme S-3** demonstrates the fact that a longer sequence of steps, even a series of high yielding steps, is detrimental to synthetic efficiency because of the number of reagents used. As a result, improved step economy will more than likely improve efficiency as evaluated by other metrics such as yield, atom economy capital cost and *E*-factor.<sup>12</sup>

Furthermore, this study only analyzes single aldol reactions, whereas the main text describes our goal of stereoselective double, triple, and even tetra-aldol reactions. While direct comparisons to polyaldol reactions are difficult, this analysis suggests that the step- and atom-economy benefits will increase with each successive aldol cascade.

### Computational Methods

Molecular geometries of the transition state structures of the reaction pathways were optimized using Density Functional Theory with Becke's three-parameter hybrid

<sup>12</sup> Constable, D. J. C.; Curzons, A. D.; Cunningham, V. L. *Green Chem.* **2002**, *4*, 521–527.

functional<sup>13</sup> and Lee, Yang, and Parr's (LYP)<sup>14</sup> correlation functional. The 6-31+G(d) basis sets were used in this study. All geometries were optimized without any symmetry restrictions and characterized as first-order saddle points (one imaginary frequency) by calculations of harmonic vibrational frequencies. Gibbs free energies of activation ( $\Delta G^\ddagger$ ) were calculated as the difference of free energies of transition states. All calculations have been carried out using the Gaussian 03 and Gaussian 09 program package.<sup>15 16</sup>

### Computational data for enolborinate addition to $\beta$ -super siloxy butanal

Computational experiments were performed as described above to reveal the transition state structures of acetone 9-BBN enolborinate addition to  $\beta$ -Super Siloxy Butanal (**Scheme S-5**). Relative energies for transition state structures are shown in **Table S-1**. Structures and Newman projections are shown in **Figure S-1**, with full data following.

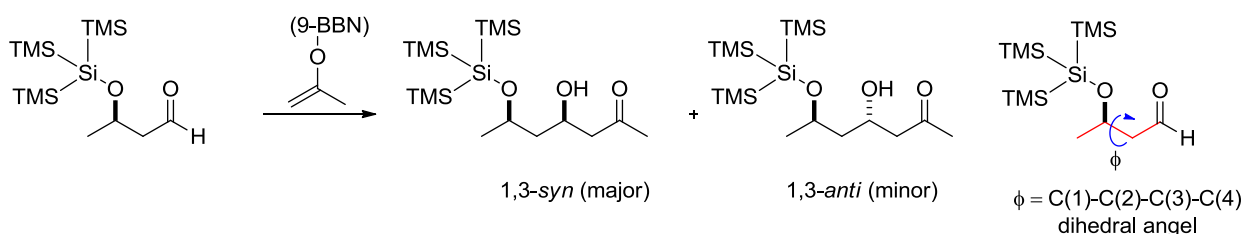

### Scheme S-5: Enolborinate aldol addition to $\beta$ -super siloxy butanal

<sup>13</sup> Becke, A. D. *J. Chem. Phys.* **1993**, *98*, 5648–5652.

<sup>14</sup> Lee, C.; Yang, W.; Parr, R. G. *Phys. Rev. B* **1988**, *37*, 785–789.

<sup>15</sup> Frisch, M. J.; Trucks, G. W.; Schlegel, H. B.; Scuseria, G. E.; Robb, M. A.; Cheeseman, J. R.; Montgomery, J. A., Jr.; Vreven, T.; Kudin, K. N.; Burant, J. C.; Millam, J. M.; Iyengar, S. S.; Tomasi, J.; Barone, V.; Mennucci, B.; Cossi, M.; Scalmani, G.; Rega, N.; Petersson, G. A.; Nakatsuji, H.; Hada, M.; Ehara, M.; Toyota, K.; Fukuda, R.; Hasegawa, J.; Ishida, M.; Nakajima, T.; Honda, Y.; Kitao, O.; Nakai, H.; Klene, M.; Li, X.; Knox, J. E.; Hratchian, H. P.; Cross, J. B.; Bakken, V.; Adamo, C.; Jaramillo, J.; Gomperts, R.; Stratmann, R. E.; Yazyev, O.; Austin, A. J.; Cammi, R.; Pomelli, C.; Ochterski, J. W.; Ayala, P. Y.; Morokuma, K.; Voth, G. A.; Salvador, P.; Dannenberg, J. J.; Zakrzewski, V. G.; Dapprich, S.; Daniels, A. D.; Strain, M. C.; Farkas, O.; Malick, D. K.; Rabuck, A. D.; Raghavachari, K.; Foresman, J. B.; Ortiz, J. V.; Cui, Q.; Baboul, A. G.; Clifford, S.; Cioslowski, J.; Stefanov, B. B.; Liu, G.; Liashenko, A.; Piskorz, P.; Komaromi, I.; Martin, R. L.; Fox, D. J.; Keith, T.; Al-Laham, M. A.; Peng, C. Y.; Nanayakkara, A.; Challacombe, M.; Gill, P. M. W.; Johnson, B.; Chen, W.; Wong, M. W.; Gonzalez, C.; Pople, J. A. *Gaussian 03, revision E.01*; Gaussian Inc., Wallingford, CT, 2004.

<sup>16</sup> Frisch, M. J.; Trucks, G. W.; Schlegel, H. B.; Scuseria, G. E.; Robb, M. A.; Cheeseman, J. R.; Scalmani, G.; Barone, V.; Mennucci, B.; Petersson, G. A.; Nakatsuji, H.; Caricato, M.; Li, X.; Hratchian, H. P.; Izmaylov, A. F.; Bloino, J.; Zheng, G.; Sonnenberg, J. L.; Hada, M.; Ehara, M.; Toyota, K.; Fukuda, R.; Hasegawa, J.; Ishida, M.; Nakajima, T.; Honda, Y.; Kitao, O.; Nakai, H.; Vreven, T.; Montgomery, J. A., Jr.; Peralta, J. E.; Ogliaro, F.; Bearpark, M.; Heyd, J. J.; Brothers, E.; Kudin, K. N.; Staroverov, V. N.; Kobayashi, R.; Normand, J.; Raghavachari, K.; Rendell, A.; Burant, J. C.; Iyengar, S. S.; Tomasi, J.; Cossi, M.; Rega, N.; Millam, J. M.; Klene, M.; Knox, J. E.; Cross, J. B.; Bakken, V.; Adamo, C.; Jaramillo, J.; Gomperts, R.; Stratmann, R. E.; Yazyev, O.; Austin, A. J.; Cammi, R.; Pomelli, C.; Ochterski, J. W.; Martin, R. L.; Morokuma, K.; Zakrzewski, V. G.; Voth, G. A.; Salvador, P.; Dannenberg, J. J.; Dapprich, S.; Daniels, A. D.; Farkas, A.; Foresman, J. B.; Ortiz, J. V.; Cioslowski, J.; Fox, D. J.; *Gaussian 09, Revision C.01*; Gaussian Inc.: Wallingford, CT, 2009.

**Table S-1.** Relative energies of the optimized transition state structures of the reaction using  $\beta$ -super siloxy butanal in kcal mol<sup>-1</sup>. Relative to **A** (TS-H-syn(-60)).

| TS       | ( $\phi$ ) | 1,3- <i>syn/anti</i> | Relative Electron Energy | Relative Free Energy |
|----------|------------|----------------------|--------------------------|----------------------|
| <b>A</b> | -60        | <i>syn</i>           | 0.00                     | 0.00                 |
| <b>B</b> | 60         | <i>syn</i>           | 1.18                     | 1.50                 |
| <b>C</b> | 180        | <i>syn</i>           | 4.53                     | 5.90                 |
| <b>D</b> | -60        | <i>anti</i>          | 1.32                     | 1.46                 |
| <b>E</b> | 60         | <i>anti</i>          | 0.88                     | 1.02                 |

$\phi$  = non-optimized C(1)-C(2)-C(3)-C(4) dihedral angle. Optimized dihedral angles shown in figure S1.

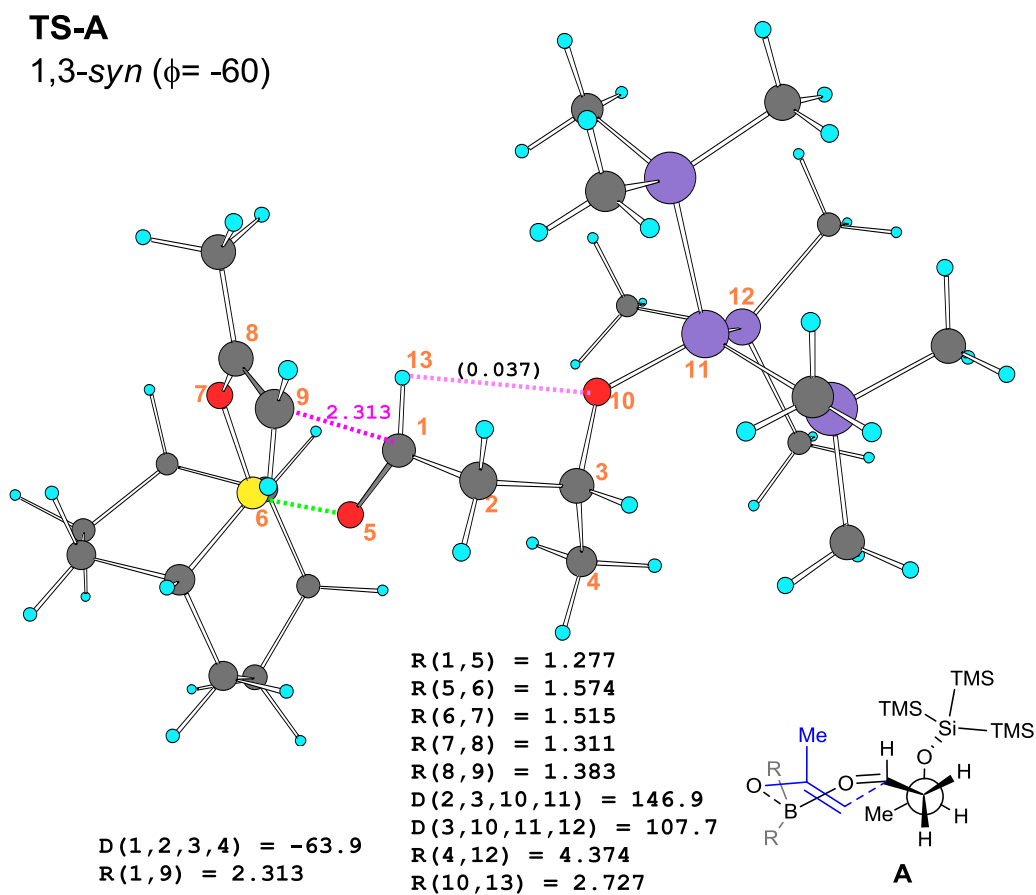

### TS-B

1,3-syn, ( $\phi = 60$ )

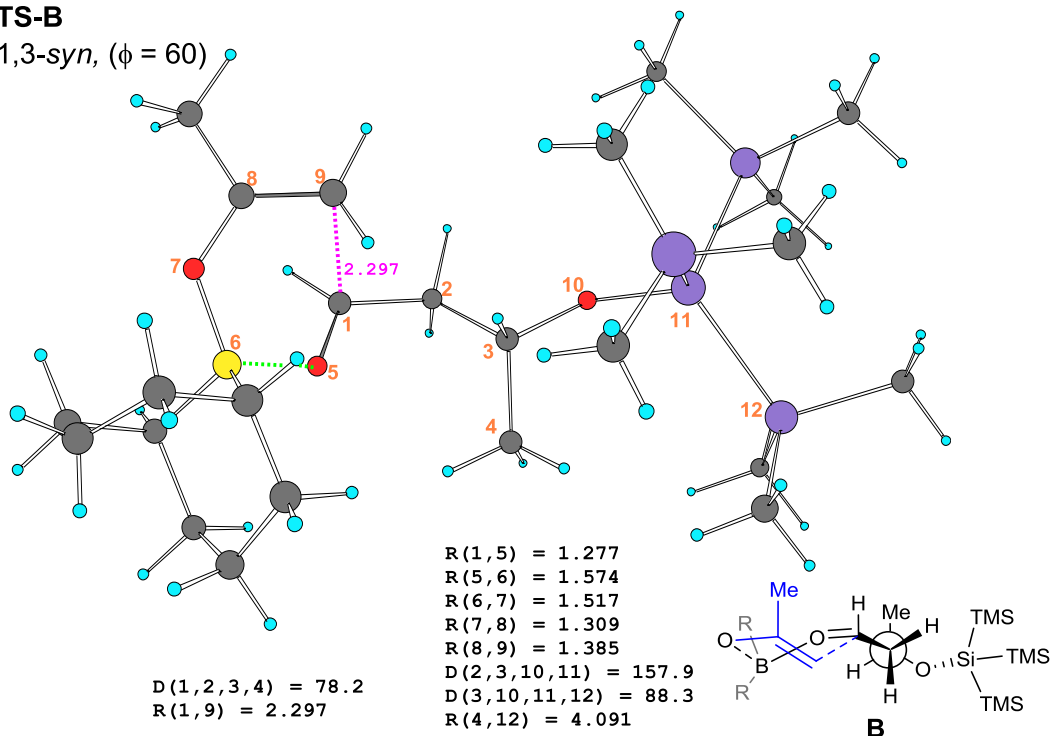

### TS C

1,3-syn( $\phi=180$ )

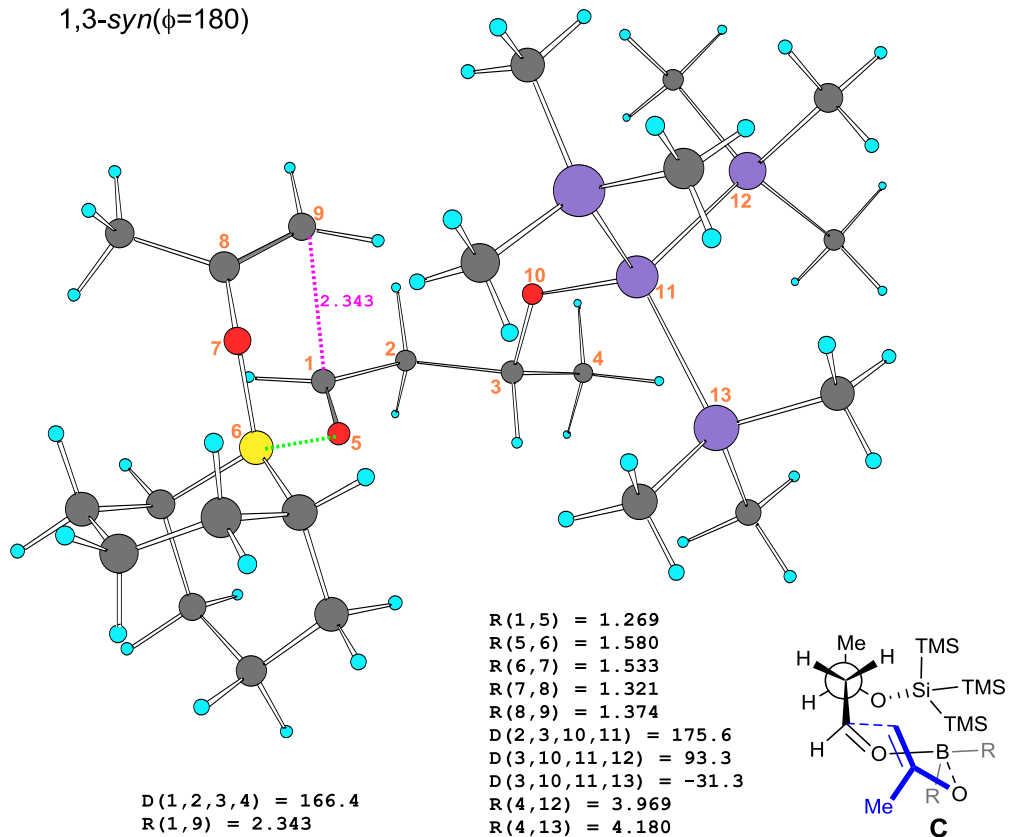

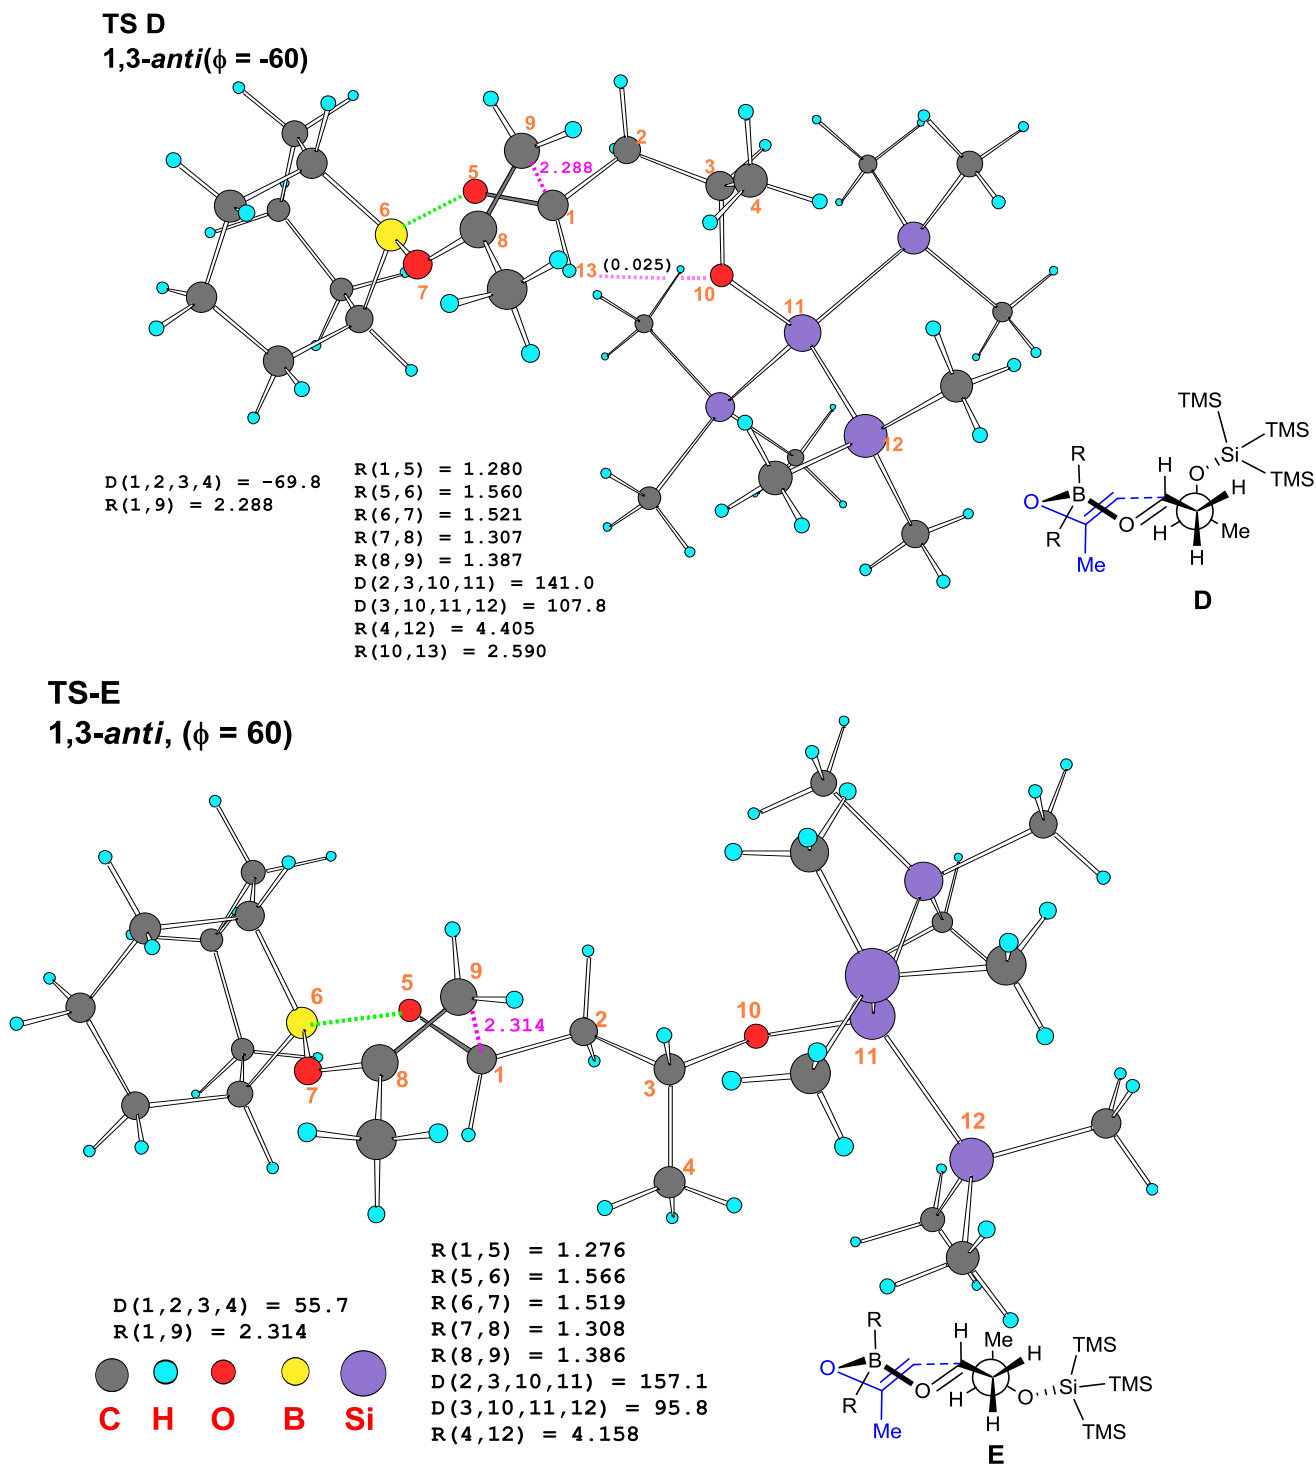

**Figure S1.** B3LYP optimized transition state structures and representative Newman projections of the enolborinate addition to  $\beta$ -super siloxy butanal. Mulliken electron population is in parenthesis.



## Computational Data for Enolborinate Addition to $\alpha$ -Methyl $\beta$ -Super Siloxy Butanal

Computational experiments were performed as described above to reveal the transition state structures of acetone 9-BBN enolborinate addition to  $\alpha$ -Methyl  $\beta$ -Super Siloxy Butanal (**Scheme S-6**). Relative energies for transition state structures are shown in Table S-2. Structures and Newman projections are shown in **Figure S-2**, with full data following.

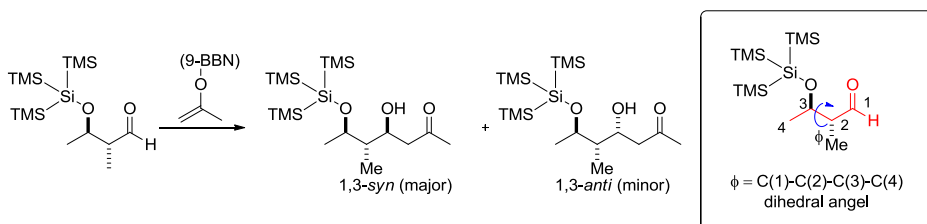

**Scheme S-2:** Enolborinate Addition to  $\alpha$ -Methyl  $\beta$ -Super Siloxy Butanal

**Table S-2:** Calculated Transitions State Energies for Enolborinate Addition to  $\alpha$ -methyl  $\beta$ -super Siloxy Butanal

| TS       | ( $\phi$ ) | 1,3- <i>syn/anti</i> | Relative Electron Energy | Relative Free Energy |
|----------|------------|----------------------|--------------------------|----------------------|
| <b>F</b> | 60         | <i>syn</i>           | 0.45                     | 0.00                 |
| <b>G</b> | 180        | <i>syn</i>           | 5.07                     | 7.78                 |
| <b>H</b> | -60        | <i>syn</i>           | 0.00                     | 0.19                 |
| <b>I</b> | 60         | <i>anti</i>          | 0.09                     | 0.40                 |
| <b>J</b> | -60        | <i>anti</i>          | 0.92                     | 1.57                 |

$\phi$  = non-optimized dihedral angle. Optimized dihedral angle given in figure S2.

### TS F

1,3-syn( $\phi = 60$ )

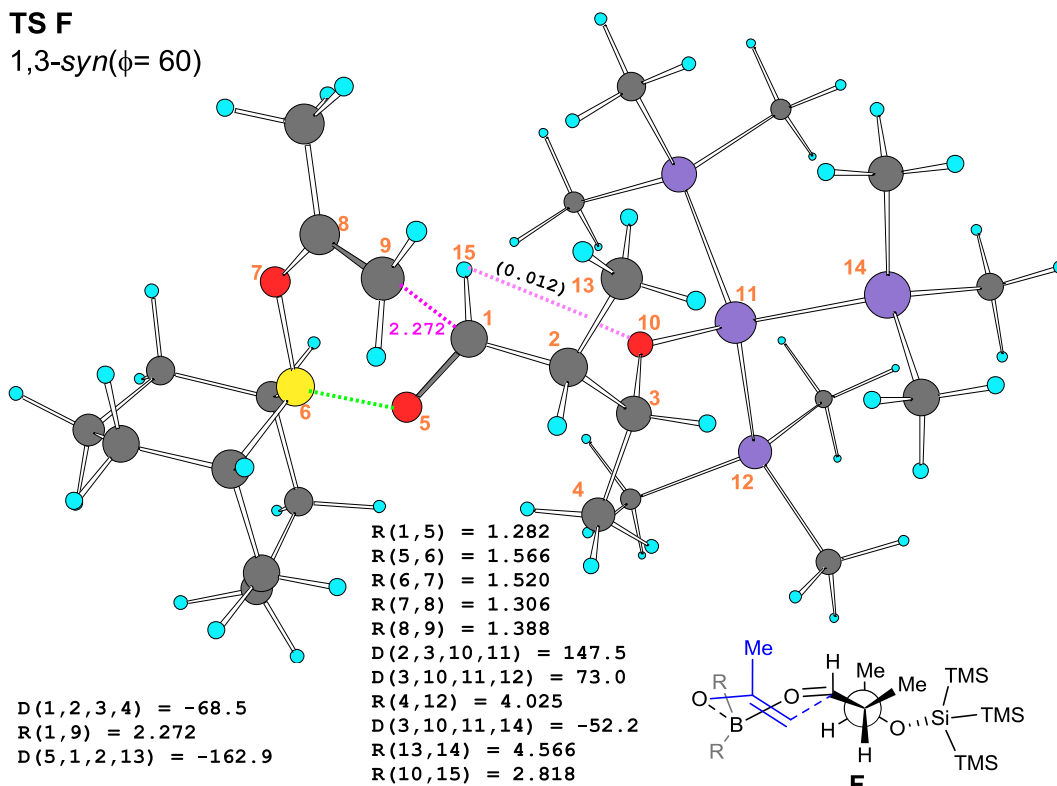

### TS G

1,3-syn( $\phi = 180$ )

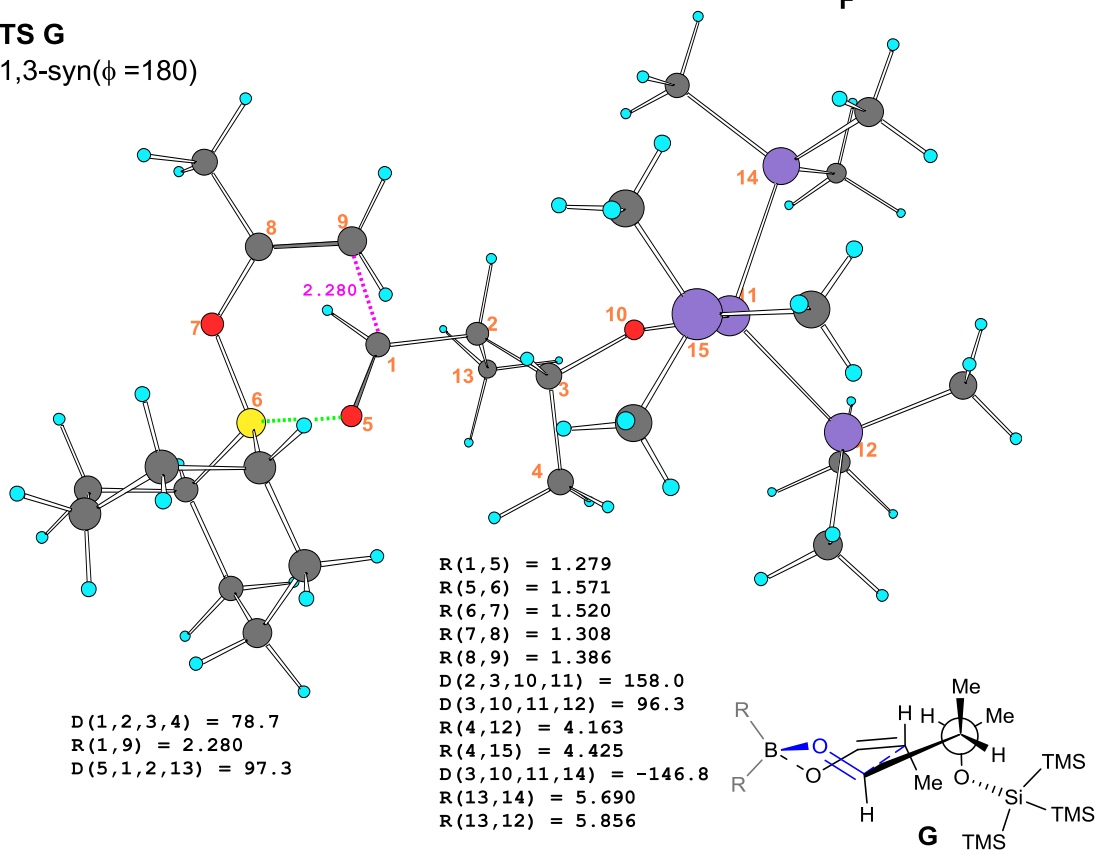

### TS H

1,3-syn( $\phi=-60$ )

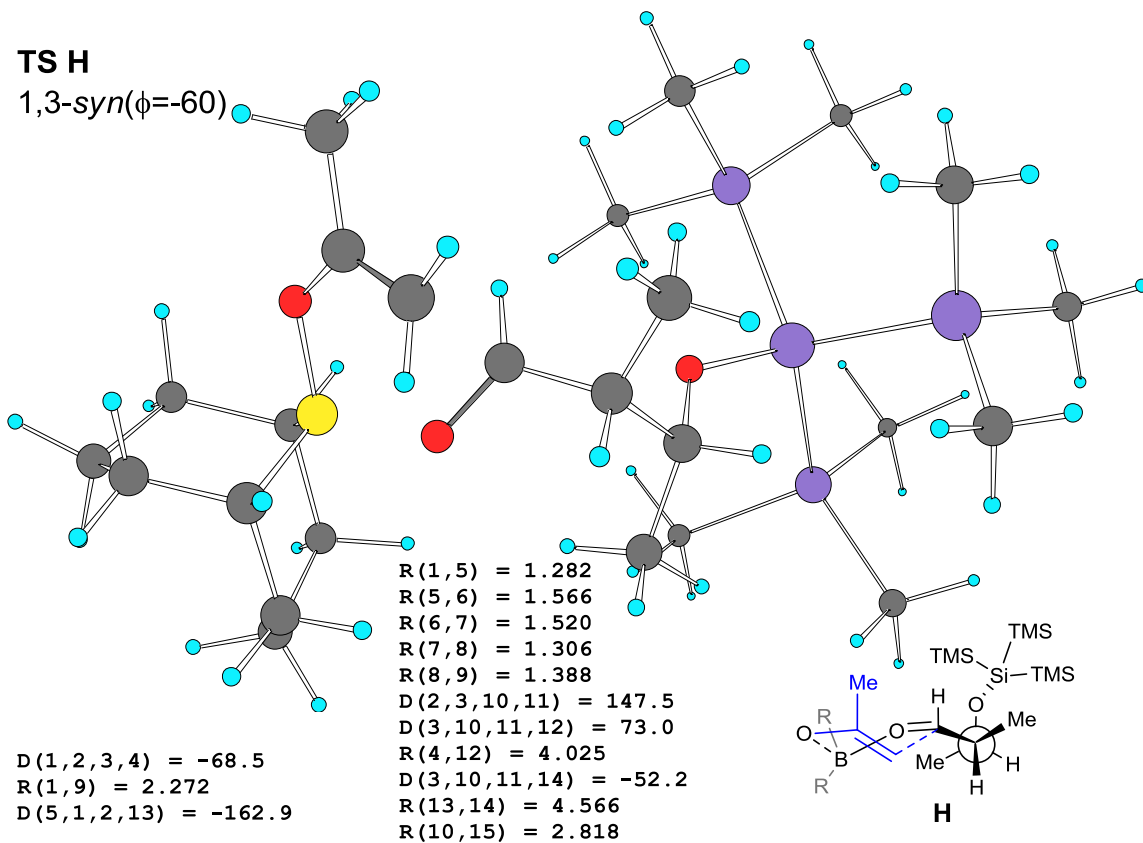

### TS I

1,3-anti( $\phi=60$ )

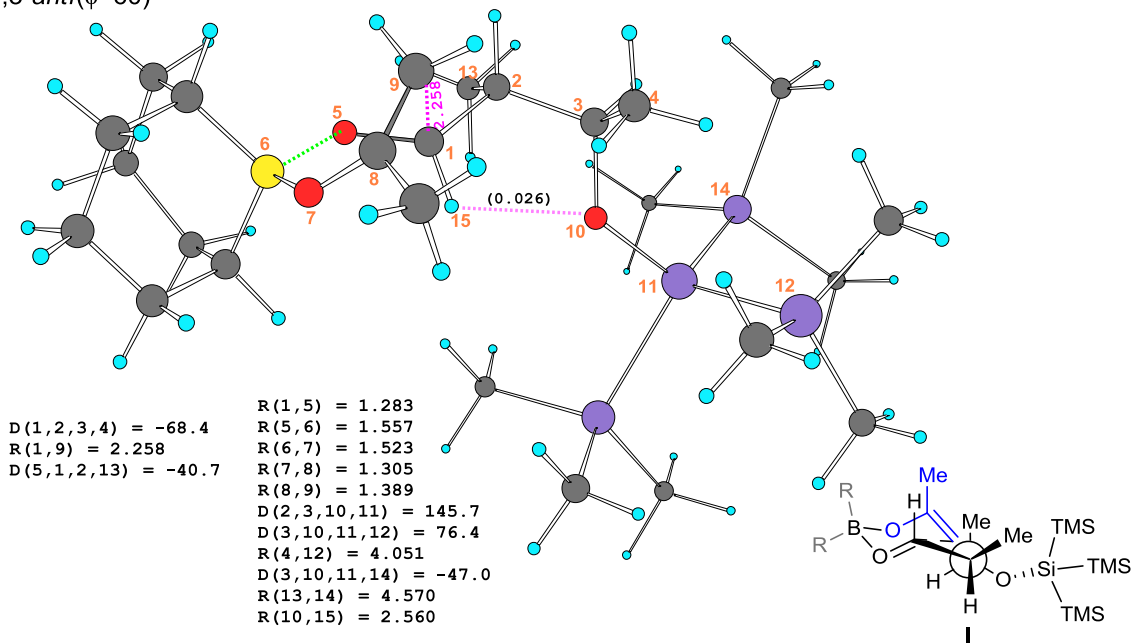

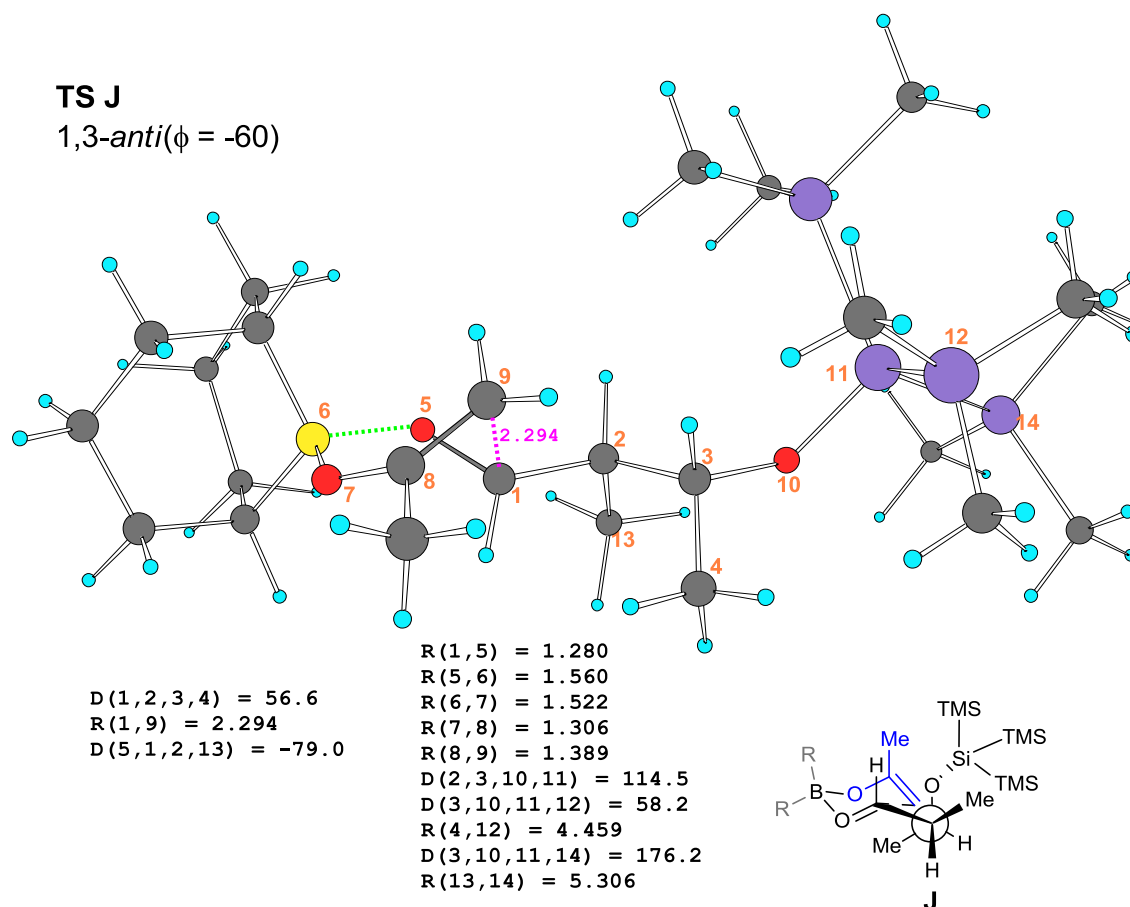

**Figure S-2** Calculated Transition State Structures and Representative Newman Projections for Enolborinate Addition to *anti*- $\alpha$ -methyl  $\beta$ -super Siloxy Butanal

**TS A**

1,3-*syn*( $\phi = -60$ )

Method: B3LYP/6-31+G(d)

SCF Done: E(RB+HF-LYP) = -2355.18566238 A.U. after 9 cycles

Imaginary frequencies: 1(-214)

Zero-point correction= 0.736204 (Hartree/Particle)

Thermal correction to Energy= 0.782167

Thermal correction to Enthalpy= 0.783111

Thermal correction to Gibbs Free Energy= 0.655294

Sum of electronic and zero-point Energies= -2354.449458

Sum of electronic and thermal Energies= -2354.403495

Sum of electronic and thermal Enthalpies= -2354.402551

Sum of electronic and thermal Free Energies= -2354.530369

Standard orientation:

| Center Number | Atomic Number | Atomic Type | Coordinates (Angstroms) |          |           |
|---------------|---------------|-------------|-------------------------|----------|-----------|
|               |               |             | X                       | Y        | Z         |
| 1             | 6             | O           | 2.852159                | 2.530246 | -1.554204 |

|    |    |   |           |           |           |
|----|----|---|-----------|-----------|-----------|
| 2  | 6  | 0 | 3.295613  | 2.581218  | -0.244930 |
| 3  | 8  | 0 | 3.874131  | 1.589201  | 0.386450  |
| 4  | 6  | 0 | 3.011501  | 3.763121  | 0.646137  |
| 5  | 5  | 0 | 3.993316  | 0.156743  | -0.093043 |
| 6  | 6  | 0 | 4.080495  | -0.833226 | 1.176435  |
| 7  | 6  | 0 | 5.288097  | -0.115676 | -1.024051 |
| 8  | 6  | 0 | 5.253293  | -1.585566 | -1.513860 |
| 9  | 6  | 0 | 6.549885  | 0.257787  | -0.202096 |
| 10 | 6  | 0 | 4.063829  | -2.303308 | 0.685646  |
| 11 | 6  | 0 | 5.341138  | -0.447544 | 1.993097  |
| 12 | 6  | 0 | 5.108027  | -2.649797 | -0.402054 |
| 13 | 6  | 0 | 6.661254  | -0.414580 | 1.186697  |
| 14 | 8  | 0 | 2.710215  | -0.121490 | -0.961031 |
| 15 | 6  | 0 | 1.680057  | 0.632877  | -0.942760 |
| 16 | 6  | 0 | 0.639235  | 0.470133  | -2.012857 |
| 17 | 6  | 0 | -0.493337 | -0.509489 | -1.604625 |
| 18 | 6  | 0 | -0.012516 | -1.944578 | -1.389611 |
| 19 | 8  | 0 | -1.109188 | 0.014798  | -0.434029 |
| 20 | 14 | 0 | -2.745322 | -0.074432 | 0.073762  |
| 21 | 14 | 0 | -3.167988 | 2.166068  | 0.780271  |
| 22 | 14 | 0 | -2.860653 | -1.597454 | 1.912293  |
| 23 | 14 | 0 | -4.238076 | -0.710856 | -1.690043 |
| 24 | 6  | 0 | -2.557955 | 3.365051  | -0.566163 |
| 25 | 6  | 0 | -5.018056 | 2.489123  | 1.091820  |
| 26 | 6  | 0 | -2.213894 | 2.556887  | 2.380504  |
| 27 | 6  | 0 | -3.751448 | -2.342169 | -2.545549 |
| 28 | 6  | 0 | -5.966386 | -0.958801 | -0.928642 |
| 29 | 6  | 0 | -4.372725 | 0.628278  | -3.038179 |
| 30 | 6  | 0 | -1.310878 | -1.384252 | 2.990949  |
| 31 | 6  | 0 | -4.405304 | -1.238694 | 2.968845  |
| 32 | 6  | 0 | -2.952338 | -3.419934 | 1.364916  |
| 33 | 1  | 0 | 2.339488  | 3.399264  | -1.956295 |
| 34 | 1  | 0 | 3.278538  | 1.845231  | -2.274531 |
| 35 | 1  | 0 | 2.403667  | 3.456245  | 1.506544  |
| 36 | 1  | 0 | 2.502144  | 4.567623  | 0.109587  |
| 37 | 1  | 0 | 3.957140  | 4.148891  | 1.045881  |
| 38 | 1  | 0 | 3.211535  | -0.702040 | 1.844212  |
| 39 | 1  | 0 | 5.296233  | 0.521349  | -1.923869 |
| 40 | 1  | 0 | 6.156822  | -1.810699 | -2.103142 |
| 41 | 1  | 0 | 4.406951  | -1.687041 | -2.208296 |
| 42 | 1  | 0 | 7.460165  | 0.030877  | -0.780123 |
| 43 | 1  | 0 | 6.544845  | 1.348228  | -0.061427 |
| 44 | 1  | 0 | 4.196349  | -2.990918 | 1.536437  |
| 45 | 1  | 0 | 3.061456  | -2.512650 | 0.283659  |
| 46 | 1  | 0 | 5.464913  | -1.130791 | 2.848697  |
| 47 | 1  | 0 | 5.167673  | 0.549056  | 2.422150  |
| 48 | 1  | 0 | 4.835507  | -3.610562 | -0.862869 |
| 49 | 1  | 0 | 6.081438  | -2.821596 | 0.068503  |
| 50 | 1  | 0 | 7.423325  | 0.115560  | 1.776262  |
| 51 | 1  | 0 | 7.044550  | -1.433734 | 1.070226  |
| 52 | 1  | 0 | 1.364269  | 1.077789  | 0.001855  |
| 53 | 1  | 0 | 0.175709  | 1.441583  | -2.209389 |
| 54 | 1  | 0 | 1.118637  | 0.115136  | -2.931446 |
| 55 | 1  | 0 | -1.213463 | -0.500923 | -2.437473 |

|    |   |   |           |           |           |
|----|---|---|-----------|-----------|-----------|
| 56 | 1 | 0 | -0.864651 | -2.603528 | -1.192171 |
| 57 | 1 | 0 | 0.677955  | -2.006970 | -0.542959 |
| 58 | 1 | 0 | 0.505778  | -2.319164 | -2.280547 |
| 59 | 1 | 0 | -1.485419 | 3.234395  | -0.753795 |
| 60 | 1 | 0 | -2.717075 | 4.405820  | -0.252670 |
| 61 | 1 | 0 | -3.083205 | 3.220409  | -1.517823 |
| 62 | 1 | 0 | -5.160094 | 3.506322  | 1.481430  |
| 63 | 1 | 0 | -5.441377 | 1.793913  | 1.826711  |
| 64 | 1 | 0 | -5.610706 | 2.404902  | 0.172609  |
| 65 | 1 | 0 | -2.582959 | 1.975287  | 3.233947  |
| 66 | 1 | 0 | -1.143087 | 2.345667  | 2.272908  |
| 67 | 1 | 0 | -2.320217 | 3.620261  | 2.635501  |
| 68 | 1 | 0 | -2.809656 | -2.259563 | -3.100790 |
| 69 | 1 | 0 | -4.532026 | -2.624539 | -3.265460 |
| 70 | 1 | 0 | -3.645629 | -3.168107 | -1.832697 |
| 71 | 1 | 0 | -6.692704 | -1.173087 | -1.724491 |
| 72 | 1 | 0 | -6.320172 | -0.071936 | -0.389875 |
| 73 | 1 | 0 | -5.987813 | -1.804352 | -0.230268 |
| 74 | 1 | 0 | -4.754785 | 1.574706  | -2.637230 |
| 75 | 1 | 0 | -3.406503 | 0.836384  | -3.514314 |
| 76 | 1 | 0 | -5.064431 | 0.300094  | -3.826109 |
| 77 | 1 | 0 | -0.396925 | -1.594550 | 2.423168  |
| 78 | 1 | 0 | -1.341400 | -2.075161 | 3.844315  |
| 79 | 1 | 0 | -1.225841 | -0.365869 | 3.387710  |
| 80 | 1 | 0 | -4.463563 | -1.957531 | 3.797519  |
| 81 | 1 | 0 | -5.334012 | -1.328234 | 2.392049  |
| 82 | 1 | 0 | -4.382048 | -0.234514 | 3.409211  |
| 83 | 1 | 0 | -3.857673 | -3.633900 | 0.783457  |
| 84 | 1 | 0 | -2.086674 | -3.714404 | 0.759495  |
| 85 | 1 | 0 | -2.968741 | -4.071619 | 2.249355  |

---

## TS-B

1,3-*syn*( $\phi=60$ )

Method: B3LYP/6-31+G(d)

SCF Done: E(RB+HF-LYP) = -2355.18377975 A.U. after 8 cycles

Imaginary frequencies: 1(-245)

Zero-point correction= 0.736074 (Hartree/Particle)  
Thermal correction to Energy= 0.781948  
Thermal correction to Enthalpy= 0.782892  
Thermal correction to Gibbs Free Energy= 0.655800  
Sum of electronic and zero-point Energies= -2354.447706  
Sum of electronic and thermal Energies= -2354.401832  
Sum of electronic and thermal Enthalpies= -2354.400888  
Sum of electronic and thermal Free Energies= -2354.527980

Standard orientation:

| Center<br>Number | Atomic<br>Number | Atomic<br>Type | Coordinates (Angstroms) |           |           |
|------------------|------------------|----------------|-------------------------|-----------|-----------|
|                  |                  |                | X                       | Y         | Z         |
| 1                | 6                | 0              | -2.191355               | 2.307505  | 0.439954  |
| 2                | 6                | 0              | -3.501775               | 2.585054  | 0.089092  |
| 3                | 8                | 0              | -4.418161               | 1.677141  | -0.132888 |
| 4                | 6                | 0              | -3.962917               | 3.984360  | -0.227463 |
| 5                | 5                | 0              | -4.204195               | 0.180645  | -0.263572 |
| 6                | 6                | 0              | -5.316525               | -0.437490 | -1.252448 |
| 7                | 6                | 0              | -4.287595               | -0.615304 | 1.140738  |
| 8                | 6                | 0              | -3.982986               | -2.114106 | 0.890040  |
| 9                | 6                | 0              | -5.686563               | -0.343970 | 1.756284  |
| 10               | 6                | 0              | -5.010210               | -1.938126 | -1.493558 |
| 11               | 6                | 0              | -6.711192               | -0.161744 | -0.630921 |
| 12               | 6                | 0              | -4.831866               | -2.787390 | -0.213351 |
| 13               | 6                | 0              | -6.887584               | -0.643054 | 0.828388  |
| 14               | 8                | 0              | -2.756047               | -0.006183 | -0.850334 |
| 15               | 6                | 0              | -2.109916               | 0.944242  | -1.407285 |
| 16               | 6                | 0              | -0.654366               | 0.789304  | -1.745595 |
| 17               | 6                | 0              | 0.178444                | -0.158097 | -0.863701 |
| 18               | 6                | 0              | -0.044068               | -1.630304 | -1.208983 |
| 19               | 8                | 0              | 1.540021                | 0.218979  | -1.062041 |
| 20               | 14               | 0              | 2.901348                | -0.047376 | -0.056939 |
| 21               | 14               | 0              | 4.297445                | 1.748780  | -0.775913 |
| 22               | 14               | 0              | 3.956119                | -2.149267 | -0.524752 |
| 23               | 14               | 0              | 2.358007                | 0.136220  | 2.270838  |
| 24               | 6                | 0              | 3.277357                | 3.353776  | -0.816453 |
| 25               | 6                | 0              | 5.794713                | 2.008291  | 0.371719  |
| 26               | 6                | 0              | 4.940249                | 1.424964  | -2.537765 |
| 27               | 6                | 0              | 1.049259                | -1.125419 | 2.839875  |
| 28               | 6                | 0              | 3.935804                | -0.187342 | 3.287720  |
| 29               | 6                | 0              | 1.717764                | 1.877947  | 2.698718  |
| 30               | 6                | 0              | 3.818697                | -2.557949 | -2.377458 |
| 31               | 6                | 0              | 5.802173                | -2.037616 | -0.061126 |
| 32               | 6                | 0              | 3.229046                | -3.608761 | 0.461696  |
| 33               | 1                | 0              | -1.502374               | 3.140062  | 0.548902  |
| 34               | 1                | 0              | -1.928226               | 1.393492  | 0.954859  |
| 35               | 1                | 0              | -4.309805               | 4.047127  | -1.266682 |

|    |   |   |           |           |           |
|----|---|---|-----------|-----------|-----------|
| 36 | 1 | 0 | -3.174663 | 4.722994  | -0.061635 |
| 37 | 1 | 0 | -4.820399 | 4.233581  | 0.409155  |
| 38 | 1 | 0 | -5.297242 | 0.062026  | -2.236694 |
| 39 | 1 | 0 | -3.543764 | -0.253405 | 1.870034  |
| 40 | 1 | 0 | -4.099527 | -2.685666 | 1.824808  |
| 41 | 1 | 0 | -2.921544 | -2.201137 | 0.616793  |
| 42 | 1 | 0 | -5.807069 | -0.917882 | 2.688943  |
| 43 | 1 | 0 | -5.724306 | 0.715875  | 2.046214  |
| 44 | 1 | 0 | -5.798375 | -2.393514 | -2.114207 |
| 45 | 1 | 0 | -4.085838 | -2.002434 | -2.086604 |
| 46 | 1 | 0 | -7.500859 | -0.614582 | -1.251704 |
| 47 | 1 | 0 | -6.882234 | 0.923130  | -0.665305 |
| 48 | 1 | 0 | -4.365826 | -3.746059 | -0.484094 |
| 49 | 1 | 0 | -5.814686 | -3.049001 | 0.191485  |
| 50 | 1 | 0 | -7.786480 | -0.170829 | 1.250566  |
| 51 | 1 | 0 | -7.096527 | -1.717719 | 0.836076  |
| 52 | 1 | 0 | -2.663664 | 1.668259  | -2.011750 |
| 53 | 1 | 0 | -0.609240 | 0.444289  | -2.792963 |
| 54 | 1 | 0 | -0.193173 | 1.781890  | -1.740092 |
| 55 | 1 | 0 | -0.098499 | 0.011884  | 0.186785  |
| 56 | 1 | 0 | 0.543941  | -2.276427 | -0.548963 |
| 57 | 1 | 0 | 0.265408  | -1.823162 | -2.243259 |
| 58 | 1 | 0 | -1.098550 | -1.899856 | -1.099058 |
| 59 | 1 | 0 | 2.400655  | 3.242562  | -1.465548 |
| 60 | 1 | 0 | 3.882789  | 4.182449  | -1.208312 |
| 61 | 1 | 0 | 2.921307  | 3.642549  | 0.179661  |
| 62 | 1 | 0 | 6.432948  | 2.810206  | -0.023771 |
| 63 | 1 | 0 | 6.414475  | 1.107892  | 0.459365  |
| 64 | 1 | 0 | 5.489398  | 2.302417  | 1.383417  |
| 65 | 1 | 0 | 5.604171  | 0.553241  | -2.579613 |
| 66 | 1 | 0 | 4.115510  | 1.250996  | -3.239497 |
| 67 | 1 | 0 | 5.509602  | 2.291926  | -2.900076 |
| 68 | 1 | 0 | 0.080919  | -0.982221 | 2.346387  |
| 69 | 1 | 0 | 0.883451  | -1.021329 | 3.921137  |
| 70 | 1 | 0 | 1.365912  | -2.158350 | 2.653576  |
| 71 | 1 | 0 | 3.716917  | -0.070075 | 4.357856  |
| 72 | 1 | 0 | 4.746230  | 0.507657  | 3.039018  |
| 73 | 1 | 0 | 4.313778  | -1.206580 | 3.141352  |
| 74 | 1 | 0 | 2.475569  | 2.647017  | 2.506910  |
| 75 | 1 | 0 | 0.824234  | 2.141843  | 2.119887  |
| 76 | 1 | 0 | 1.450479  | 1.933775  | 3.762826  |
| 77 | 1 | 0 | 2.772945  | -2.663649 | -2.688823 |
| 78 | 1 | 0 | 4.330536  | -3.505102 | -2.595860 |
| 79 | 1 | 0 | 4.272663  | -1.779946 | -3.002571 |
| 80 | 1 | 0 | 6.283391  | -3.013258 | -0.213963 |
| 81 | 1 | 0 | 5.947442  | -1.761809 | 0.990546  |
| 82 | 1 | 0 | 6.341752  | -1.306379 | -0.674867 |
| 83 | 1 | 0 | 3.340942  | -3.466690 | 1.543549  |
| 84 | 1 | 0 | 2.164327  | -3.769505 | 0.255650  |
| 85 | 1 | 0 | 3.757244  | -4.534914 | 0.196129  |

---



### TS-C

1,3-*syn*( $\phi=180$ )

Method: B3LYP/6-31+G(d)

SCF Done: E(RB+HF-LYP) = -2355.17844557 A.U. after 9 cycles

Imaginary frequencies: 1(-192)

Zero-point correction= 0.736117 (Hartree/Particle)

Thermal correction to Energy= 0.781821

Thermal correction to Enthalpy= 0.782766

Thermal correction to Gibbs Free Energy= 0.657490

Sum of electronic and zero-point Energies= -2354.442329

Sum of electronic and thermal Energies= -2354.396624

Sum of electronic and thermal Enthalpies= -2354.395680

Sum of electronic and thermal Free Energies= -2354.520955

Standard orientation:

| Center<br>Number | Atomic<br>Number | Atomic<br>Type | Coordinates (Angstroms) |           |           |
|------------------|------------------|----------------|-------------------------|-----------|-----------|
|                  |                  |                | X                       | Y         | Z         |
| 1                | 6                | 0              | 1.363738                | -2.615229 | -0.671728 |
| 2                | 6                | 0              | 2.641866                | -2.548994 | -0.173006 |
| 3                | 8                | 0              | 3.041932                | -1.516464 | 0.547542  |
| 4                | 6                | 0              | 3.680117                | -3.604262 | -0.460046 |
| 5                | 5                | 0              | 3.371945                | -0.145667 | -0.053762 |
| 6                | 6                | 0              | 4.770155                | -0.087671 | -0.866453 |
| 7                | 6                | 0              | 3.396415                | 0.992732  | 1.070994  |
| 8                | 6                | 0              | 3.525287                | 2.376438  | 0.383706  |
| 9                | 6                | 0              | 4.538264                | 0.662639  | 2.067153  |
| 10               | 6                | 0              | 4.903094                | 1.302764  | -1.544610 |
| 11               | 6                | 0              | 5.913060                | -0.411870 | 0.134443  |
| 12               | 6                | 0              | 4.704850                | 2.516325  | -0.606374 |
| 13               | 6                | 0              | 5.927454                | 0.443285  | 1.423545  |
| 14               | 8                | 0              | 2.128611                | 0.094609  | -0.998655 |
| 15               | 6                | 0              | 1.853098                | -0.708376 | -1.942194 |
| 16               | 6                | 0              | 0.590769                | -0.530531 | -2.741802 |
| 17               | 6                | 0              | -0.545660               | 0.288164  | -2.110367 |
| 18               | 6                | 0              | -1.577575               | 0.634223  | -3.188389 |
| 19               | 8                | 0              | -1.118302               | -0.461139 | -1.041657 |
| 20               | 14               | 0              | -2.349702               | 0.035249  | 0.057586  |
| 21               | 14               | 0              | -1.862733               | -1.207235 | 2.047503  |
| 22               | 14               | 0              | -4.476515               | -0.664726 | -0.809296 |
| 23               | 14               | 0              | -2.329502               | 2.388527  | 0.530562  |
| 24               | 6                | 0              | -0.107371               | -0.859927 | 2.677920  |
| 25               | 6                | 0              | -3.064872               | -0.744069 | 3.451879  |
| 26               | 6                | 0              | -2.039510               | -3.073883 | 1.715109  |
| 27               | 6                | 0              | -2.436369               | 3.497562  | -1.016673 |
| 28               | 6                | 0              | -3.863936               | 2.771715  | 1.595182  |
| 29               | 6                | 0              | -0.782937               | 2.912652  | 1.502217  |
| 30               | 6                | 0              | -4.255450               | -2.297542 | -1.762477 |
| 31               | 6                | 0              | -5.708798               | -0.973766 | 0.611237  |
| 32               | 6                | 0              | -5.302673               | 0.593367  | -1.979955 |

|    |   |   |           |           |           |
|----|---|---|-----------|-----------|-----------|
| 33 | 1 | 0 | 1.066749  | -3.469380 | -1.274953 |
| 34 | 1 | 0 | 0.573386  | -1.971289 | -0.307976 |
| 35 | 1 | 0 | 4.538900  | -3.168954 | -0.984798 |
| 36 | 1 | 0 | 3.275354  | -4.432510 | -1.049025 |
| 37 | 1 | 0 | 4.058417  | -3.999844 | 0.490632  |
| 38 | 1 | 0 | 4.843325  | -0.838636 | -1.674297 |
| 39 | 1 | 0 | 2.457554  | 1.000640  | 1.646676  |
| 40 | 1 | 0 | 3.600098  | 3.175885  | 1.138218  |
| 41 | 1 | 0 | 2.589220  | 2.567161  | -0.162769 |
| 42 | 1 | 0 | 4.622719  | 1.451732  | 2.831675  |
| 43 | 1 | 0 | 4.253278  | -0.252646 | 2.604541  |
| 44 | 1 | 0 | 5.882145  | 1.393648  | -2.042009 |
| 45 | 1 | 0 | 4.154596  | 1.362864  | -2.350259 |
| 46 | 1 | 0 | 6.891808  | -0.320804 | -0.363679 |
| 47 | 1 | 0 | 5.816263  | -1.467692 | 0.423338  |
| 48 | 1 | 0 | 4.551956  | 3.416835  | -1.219137 |
| 49 | 1 | 0 | 5.629587  | 2.700515  | -0.050569 |
| 50 | 1 | 0 | 6.587089  | -0.041019 | 2.158187  |
| 51 | 1 | 0 | 6.393392  | 1.411819  | 1.214048  |
| 52 | 1 | 0 | 2.669180  | -1.236664 | -2.441898 |
| 53 | 1 | 0 | 0.914650  | -0.013563 | -3.661016 |
| 54 | 1 | 0 | 0.218407  | -1.509701 | -3.063830 |
| 55 | 1 | 0 | -0.117805 | 1.217407  | -1.708144 |
| 56 | 1 | 0 | -2.395436 | 1.224919  | -2.768865 |
| 57 | 1 | 0 | -1.999572 | -0.277344 | -3.628278 |
| 58 | 1 | 0 | -1.120890 | 1.227315  | -3.990314 |
| 59 | 1 | 0 | 0.670200  | -1.066853 | 1.936111  |
| 60 | 1 | 0 | 0.097525  | -1.488990 | 3.555597  |
| 61 | 1 | 0 | 0.007215  | 0.184895  | 2.989178  |
| 62 | 1 | 0 | -2.852655 | -1.372022 | 4.328204  |
| 63 | 1 | 0 | -4.117361 | -0.893854 | 3.186892  |
| 64 | 1 | 0 | -2.942540 | 0.299948  | 3.764807  |
| 65 | 1 | 0 | -3.067606 | -3.348489 | 1.448810  |
| 66 | 1 | 0 | -1.381604 | -3.408412 | 0.904538  |
| 67 | 1 | 0 | -1.768870 | -3.640905 | 2.616382  |
| 68 | 1 | 0 | -1.547896 | 3.414573  | -1.653731 |
| 69 | 1 | 0 | -2.512805 | 4.546901  | -0.699466 |
| 70 | 1 | 0 | -3.315656 | 3.276318  | -1.633271 |
| 71 | 1 | 0 | -3.856852 | 3.832679  | 1.880444  |
| 72 | 1 | 0 | -3.891226 | 2.183842  | 2.519916  |
| 73 | 1 | 0 | -4.799853 | 2.584843  | 1.054480  |
| 74 | 1 | 0 | -0.746259 | 2.444438  | 2.492753  |
| 75 | 1 | 0 | 0.145267  | 2.650872  | 0.981207  |
| 76 | 1 | 0 | -0.785648 | 4.001206  | 1.651309  |
| 77 | 1 | 0 | -3.579083 | -2.181587 | -2.617509 |
| 78 | 1 | 0 | -5.222785 | -2.648787 | -2.146909 |
| 79 | 1 | 0 | -3.842963 | -3.086479 | -1.122355 |
| 80 | 1 | 0 | -6.688233 | -1.248155 | 0.196213  |
| 81 | 1 | 0 | -5.854988 | -0.085813 | 1.238306  |
| 82 | 1 | 0 | -5.387085 | -1.794000 | 1.263587  |
| 83 | 1 | 0 | -5.505694 | 1.548193  | -1.479651 |
| 84 | 1 | 0 | -4.698121 | 0.803432  | -2.869562 |
| 85 | 1 | 0 | -6.266220 | 0.193914  | -2.325630 |

## TS D

1,3-*anti*( $\phi=-60$ )

Method: B3LYP/6-31+G(d)

SCF Done: E(RB+HF-LYP) = -2355.18355023 A.U. after 8 cycles

Imaginary frequencies: 1(-255)

Zero-point correction= 0.736194 (Hartree/Particle)  
Thermal correction to Energy= 0.782089  
Thermal correction to Enthalpy= 0.783034  
Thermal correction to Gibbs Free Energy= 0.655510  
Sum of electronic and zero-point Energies= -2354.447356  
Sum of electronic and thermal Energies= -2354.401461  
Sum of electronic and thermal Enthalpies= -2354.400517  
Sum of electronic and thermal Free Energies= -2354.528040

Standard orientation:

| Center<br>Number | Atomic<br>Number | Atomic<br>Type | Coordinates (Angstroms) |           |           |
|------------------|------------------|----------------|-------------------------|-----------|-----------|
|                  |                  |                | X                       | Y         | Z         |
| 1                | 6                | 0              | -2.740914               | 2.735081  | -1.179013 |
| 2                | 6                | 0              | -3.199035               | 2.591690  | 0.122208  |
| 3                | 8                | 0              | -3.809993               | 1.531330  | 0.580443  |
| 4                | 6                | 0              | -2.884614               | 3.605642  | 1.192333  |
| 5                | 5                | 0              | -3.950582               | 0.187293  | -0.117870 |
| 6                | 6                | 0              | -5.297424               | 0.058102  | -1.002299 |
| 7                | 6                | 0              | -3.966175               | -0.992705 | 0.982998  |
| 8                | 6                | 0              | -3.971016               | -2.362350 | 0.255817  |
| 9                | 6                | 0              | -5.178604               | -0.762933 | 1.920732  |
| 10               | 6                | 0              | -5.284427               | -1.310647 | -1.729681 |
| 11               | 6                | 0              | -6.512564               | 0.272925  | -0.060124 |
| 12               | 6                | 0              | -5.072167               | -2.540309 | -0.815872 |
| 13               | 6                | 0              | -6.541084               | -0.619086 | 1.203145  |
| 14               | 8                | 0              | -2.716242               | 0.048585  | -1.061198 |
| 15               | 6                | 0              | -1.650416               | 0.741368  | -0.915181 |
| 16               | 6                | 0              | -0.611225               | 0.644712  | -2.004424 |
| 17               | 6                | 0              | 0.786759                | 1.153178  | -1.614760 |
| 18               | 6                | 0              | 0.873852                | 2.669902  | -1.428311 |
| 19               | 8                | 0              | 1.169300                | 0.475616  | -0.421551 |
| 20               | 14               | 0              | 2.692301                | -0.148333 | 0.064376  |
| 21               | 14               | 0              | 2.107593                | -2.299620 | 0.921374  |
| 22               | 14               | 0              | 3.535671                | 1.272168  | 1.791042  |
| 23               | 14               | 0              | 4.246671                | -0.327402 | -1.751333 |
| 24               | 6                | 0              | 0.962416                | -3.166672 | -0.323752 |
| 25               | 6                | 0              | 3.640456                | -3.392060 | 1.212162  |
| 26               | 6                | 0              | 1.168912                | -2.134893 | 2.567615  |
| 27               | 6                | 0              | 4.544984                | 1.326204  | -2.650488 |
| 28               | 6                | 0              | 5.915879                | -0.893563 | -1.030041 |
| 29               | 6                | 0              | 3.691948                | -1.602790 | -3.051868 |
| 30               | 6                | 0              | 2.076436                | 1.889167  | 2.843319  |
| 31               | 6                | 0              | 4.744248                | 0.315405  | 2.909553  |
| 32               | 6                | 0              | 4.459690                | 2.798777  | 1.122048  |
| 33               | 1                | 0              | -3.200251               | 2.202958  | -2.001323 |
| 34               | 1                | 0              | -2.209577               | 3.647368  | -1.433371 |
| 35               | 1                | 0              | -2.278007               | 3.148931  | 1.984644  |

|    |   |   |           |           |           |
|----|---|---|-----------|-----------|-----------|
| 36 | 1 | 0 | -3.819212 | 3.938916  | 1.659283  |
| 37 | 1 | 0 | -2.361718 | 4.477352  | 0.790762  |
| 38 | 1 | 0 | -5.357000 | 0.836671  | -1.781025 |
| 39 | 1 | 0 | -3.059573 | -0.961342 | 1.612197  |
| 40 | 1 | 0 | -4.053568 | -3.181915 | 0.987961  |
| 41 | 1 | 0 | -2.991768 | -2.489000 | -0.228603 |
| 42 | 1 | 0 | -5.250300 | -1.578370 | 2.658472  |
| 43 | 1 | 0 | -4.987035 | 0.153123  | 2.496746  |
| 44 | 1 | 0 | -6.218665 | -1.448171 | -2.297560 |
| 45 | 1 | 0 | -4.477560 | -1.286123 | -2.475982 |
| 46 | 1 | 0 | -7.453003 | 0.129489  | -0.616203 |
| 47 | 1 | 0 | -6.506469 | 1.326024  | 0.256249  |
| 48 | 1 | 0 | -4.820162 | -3.408681 | -1.441967 |
| 49 | 1 | 0 | -6.017473 | -2.800590 | -0.328795 |
| 50 | 1 | 0 | -7.273380 | -0.205411 | 1.911722  |
| 51 | 1 | 0 | -6.922303 | -1.611307 | 0.940741  |
| 52 | 1 | 0 | -1.316748 | 0.991290  | 0.092697  |
| 53 | 1 | 0 | -0.534482 | -0.424256 | -2.247796 |
| 54 | 1 | 0 | -0.967217 | 1.141907  | -2.914328 |
| 55 | 1 | 0 | 1.460881  | 0.870331  | -2.437234 |
| 56 | 1 | 0 | 1.910148  | 2.969656  | -1.238892 |
| 57 | 1 | 0 | 0.262833  | 2.997546  | -0.581529 |
| 58 | 1 | 0 | 0.529130  | 3.194538  | -2.327974 |
| 59 | 1 | 0 | 0.044259  | -2.589871 | -0.485255 |
| 60 | 1 | 0 | 0.668607  | -4.156094 | 0.052059  |
| 61 | 1 | 0 | 1.443742  | -3.310992 | -1.298261 |
| 62 | 1 | 0 | 3.335606  | -4.348406 | 1.658447  |
| 63 | 1 | 0 | 4.359814  | -2.925616 | 1.896217  |
| 64 | 1 | 0 | 4.167791  | -3.621630 | 0.278111  |
| 65 | 1 | 0 | 1.798336  | -1.721053 | 3.364824  |
| 66 | 1 | 0 | 0.287961  | -1.489855 | 2.465921  |
| 67 | 1 | 0 | 0.818323  | -3.120758 | 2.902102  |
| 68 | 1 | 0 | 3.647758  | 1.693960  | -3.162494 |
| 69 | 1 | 0 | 5.325821  | 1.195125  | -3.412339 |
| 70 | 1 | 0 | 4.882045  | 2.111424  | -1.963853 |
| 71 | 1 | 0 | 6.643190  | -1.030826 | -1.841750 |
| 72 | 1 | 0 | 5.837508  | -1.845950 | -0.493101 |
| 73 | 1 | 0 | 6.334803  | -0.153737 | -0.337018 |
| 74 | 1 | 0 | 3.580680  | -2.605456 | -2.622229 |
| 75 | 1 | 0 | 2.733664  | -1.332898 | -3.512938 |
| 76 | 1 | 0 | 4.437267  | -1.668343 | -3.856382 |
| 77 | 1 | 0 | 1.362789  | 2.457106  | 2.234400  |
| 78 | 1 | 0 | 2.432514  | 2.549150  | 3.646038  |
| 79 | 1 | 0 | 1.527862  | 1.062117  | 3.309166  |
| 80 | 1 | 0 | 5.121622  | 0.973551  | 3.703975  |
| 81 | 1 | 0 | 5.612903  | -0.060387 | 2.354940  |
| 82 | 1 | 0 | 4.262585  | -0.542060 | 3.394358  |
| 83 | 1 | 0 | 5.363630  | 2.522325  | 0.565608  |
| 84 | 1 | 0 | 3.831628  | 3.405609  | 0.458477  |
| 85 | 1 | 0 | 4.771367  | 3.441688  | 1.956773  |

---

## TS-E

1,3-*anti*( $\phi=60$ )

Method: B3LYP/6-31+G(d)

SCF Done: E(RB+HF-LYP) = -2355.18425994 A.U. after 13 cycles

Imaginary frequencies: 1(-220)

Zero-point correction= 0.735999 (Hartree/Particle)  
Thermal correction to Energy= 0.781976  
Thermal correction to Enthalpy= 0.782920  
Thermal correction to Gibbs Free Energy= 0.655514  
Sum of electronic and zero-point Energies= -2354.448261  
Sum of electronic and thermal Energies= -2354.402284  
Sum of electronic and thermal Enthalpies= -2354.401340  
Sum of electronic and thermal Free Energies= -2354.528746

Standard orientation:

| Center<br>Number | Atomic<br>Number | Atomic<br>Type | Coordinates (Angstroms) |           |           |
|------------------|------------------|----------------|-------------------------|-----------|-----------|
|                  |                  |                | X                       | Y         | Z         |
| 1                | 6                | 0              | 2.332153                | -1.598124 | -1.154350 |
| 2                | 6                | 0              | 3.375085                | -2.183629 | -0.453463 |
| 3                | 8                | 0              | 4.408704                | -1.540163 | 0.023684  |
| 4                | 6                | 0              | 3.337811                | -3.632593 | -0.038107 |
| 5                | 5                | 0              | 4.604278                | -0.035217 | 0.095229  |
| 6                | 6                | 0              | 5.323495                | 0.588672  | -1.210466 |
| 7                | 6                | 0              | 5.505014                | 0.330776  | 1.381883  |
| 8                | 6                | 0              | 5.578559                | 1.872681  | 1.529188  |
| 9                | 6                | 0              | 6.881727                | -0.362484 | 1.215702  |
| 10               | 6                | 0              | 5.382244                | 2.129872  | -1.054335 |
| 11               | 6                | 0              | 6.707410                | -0.095492 | -1.366593 |
| 12               | 6                | 0              | 6.020284                | 2.638566  | 0.259553  |
| 13               | 6                | 0              | 7.612142                | -0.056774 | -0.112795 |
| 14               | 8                | 0              | 3.171582                | 0.586075  | 0.213352  |
| 15               | 6                | 0              | 2.158344                | -0.090983 | 0.592706  |
| 16               | 6                | 0              | 0.806229                | 0.550196  | 0.485513  |
| 17               | 6                | 0              | -0.422436               | -0.370982 | 0.566013  |
| 18               | 6                | 0              | -0.453558               | -1.223556 | 1.836347  |
| 19               | 8                | 0              | -1.548685               | 0.496966  | 0.501427  |
| 20               | 14               | 0              | -3.164168               | 0.179475  | 0.023117  |
| 21               | 14               | 0              | -3.749980               | 2.272788  | -0.957911 |
| 22               | 14               | 0              | -4.500027               | -0.274437 | 1.957209  |
| 23               | 14               | 0              | -3.327103               | -1.610211 | -1.561310 |
| 24               | 6                | 0              | -2.379527               | 2.781959  | -2.173447 |
| 25               | 6                | 0              | -5.406187               | 2.191838  | -1.893828 |
| 26               | 6                | 0              | -3.873899               | 3.620793  | 0.379078  |
| 27               | 6                | 0              | -2.576905               | -3.242285 | -0.922171 |
| 28               | 6                | 0              | -5.173276               | -1.926460 | -1.907427 |
| 29               | 6                | 0              | -2.473431               | -1.184026 | -3.209394 |
| 30               | 6                | 0              | -3.861629               | 0.760260  | 3.419481  |
| 31               | 6                | 0              | -6.314932               | 0.198776  | 1.618983  |
| 32               | 6                | 0              | -4.491903               | -2.107599 | 2.480237  |
| 33               | 1                | 0              | 2.465362                | -0.679970 | -1.710721 |
| 34               | 1                | 0              | 1.513877                | -2.238400 | -1.470468 |

|    |   |   |           |           |           |
|----|---|---|-----------|-----------|-----------|
| 35 | 1 | 0 | 3.360415  | -3.717858 | 1.055672  |
| 36 | 1 | 0 | 4.235390  | -4.137941 | -0.414354 |
| 37 | 1 | 0 | 2.455431  | -4.148456 | -0.425162 |
| 38 | 1 | 0 | 4.758845  | 0.379837  | -2.134252 |
| 39 | 1 | 0 | 5.054623  | -0.064086 | 2.309563  |
| 40 | 1 | 0 | 6.251008  | 2.144214  | 2.358712  |
| 41 | 1 | 0 | 4.580468  | 2.230845  | 1.821549  |
| 42 | 1 | 0 | 7.545114  | -0.098975 | 2.055092  |
| 43 | 1 | 0 | 6.719613  | -1.447235 | 1.284432  |
| 44 | 1 | 0 | 5.920881  | 2.576851  | -1.905291 |
| 45 | 1 | 0 | 4.353299  | 2.512057  | -1.114148 |
| 46 | 1 | 0 | 7.255378  | 0.347223  | -2.213750 |
| 47 | 1 | 0 | 6.530965  | -1.146667 | -1.636773 |
| 48 | 1 | 0 | 5.774158  | 3.703101  | 0.384087  |
| 49 | 1 | 0 | 7.111042  | 2.603147  | 0.173353  |
| 50 | 1 | 0 | 8.428497  | -0.781976 | -0.243145 |
| 51 | 1 | 0 | 8.102267  | 0.919950  | -0.045106 |
| 52 | 1 | 0 | 2.309896  | -0.876487 | 1.336374  |
| 53 | 1 | 0 | 0.738627  | 1.264315  | 1.323661  |
| 54 | 1 | 0 | 0.764833  | 1.147367  | -0.430626 |
| 55 | 1 | 0 | -0.418201 | -1.035448 | -0.309827 |
| 56 | 1 | 0 | -1.370279 | -1.820540 | 1.873713  |
| 57 | 1 | 0 | -0.421625 | -0.587016 | 2.728703  |
| 58 | 1 | 0 | 0.390975  | -1.921899 | 1.874031  |
| 59 | 1 | 0 | -1.407511 | 2.831904  | -1.668779 |
| 60 | 1 | 0 | -2.589704 | 3.774905  | -2.593655 |
| 61 | 1 | 0 | -2.285492 | 2.079904  | -3.010217 |
| 62 | 1 | 0 | -5.663088 | 3.186055  | -2.283970 |
| 63 | 1 | 0 | -6.233161 | 1.867861  | -1.250470 |
| 64 | 1 | 0 | -5.360590 | 1.507101  | -2.749779 |
| 65 | 1 | 0 | -4.703918 | 3.442078  | 1.073357  |
| 66 | 1 | 0 | -2.951230 | 3.683837  | 0.968469  |
| 67 | 1 | 0 | -4.038423 | 4.601845  | -0.087231 |
| 68 | 1 | 0 | -1.495362 | -3.167830 | -0.758203 |
| 69 | 1 | 0 | -2.742900 | -4.038917 | -1.660472 |
| 70 | 1 | 0 | -3.034791 | -3.564919 | 0.020327  |
| 71 | 1 | 0 | -5.280968 | -2.707312 | -2.672543 |
| 72 | 1 | 0 | -5.687255 | -1.030940 | -2.276078 |
| 73 | 1 | 0 | -5.705180 | -2.270340 | -1.011861 |
| 74 | 1 | 0 | -2.949840 | -0.329883 | -3.705538 |
| 75 | 1 | 0 | -1.413536 | -0.936398 | -3.073403 |
| 76 | 1 | 0 | -2.528790 | -2.038518 | -3.897673 |
| 77 | 1 | 0 | -2.818120 | 0.519693  | 3.654621  |
| 78 | 1 | 0 | -4.462051 | 0.565972  | 4.318583  |
| 79 | 1 | 0 | -3.911680 | 1.835092  | 3.208836  |
| 80 | 1 | 0 | -6.933273 | -0.049587 | 2.492321  |
| 81 | 1 | 0 | -6.731640 | -0.339661 | 0.758790  |
| 82 | 1 | 0 | -6.432153 | 1.272458  | 1.429199  |
| 83 | 1 | 0 | -4.886516 | -2.761118 | 1.692731  |
| 84 | 1 | 0 | -3.489568 | -2.467666 | 2.741584  |
| 85 | 1 | 0 | -5.127333 | -2.241520 | 3.366576  |

---

**TS-F**

1,3-*syn*( $\phi = -60$ )

Method: B3LYP/6-31+G(d)

SCF Done: E(RB+HF-LYP) = -2394.49743653 A.U. after 7 cycles

Imaginary frequencies: 1(-242)

Zero-point correction= 0.764680 (Hartree/Particle)

Thermal correction to Energy= 0.811936

Thermal correction to Enthalpy= 0.812880

Thermal correction to Gibbs Free Energy= 0.683448

Sum of electronic and zero-point Energies= -2393.732757

Sum of electronic and thermal Energies= -2393.685500

Sum of electronic and thermal Enthalpies= -2393.684556

Sum of electronic and thermal Free Energies= -2393.813988

Standard orientation:

| Center<br>Number | Atomic<br>Number | Atomic<br>Type | Coordinates (Angstroms) |           |           |
|------------------|------------------|----------------|-------------------------|-----------|-----------|
|                  |                  |                | X                       | Y         | Z         |
| 1                | 6                | 0              | -3.188097               | -2.882003 | -0.953782 |
| 2                | 6                | 0              | -3.635895               | -2.589510 | 0.326578  |
| 3                | 8                | 0              | -3.997588               | -1.401023 | 0.728239  |
| 4                | 6                | 0              | -3.596006               | -3.608199 | 1.436448  |
| 5                | 5                | 0              | -3.817855               | -0.097751 | -0.032586 |
| 6                | 6                | 0              | -3.682740               | 1.114043  | 1.023503  |
| 7                | 6                | 0              | -5.047886               | 0.248289  | -1.025436 |
| 8                | 6                | 0              | -4.716629               | 1.557140  | -1.786793 |
| 9                | 6                | 0              | -6.346709               | 0.307488  | -0.179404 |
| 10               | 6                | 0              | -3.381469               | 2.432442  | 0.268016  |
| 11               | 6                | 0              | -4.981571               | 1.151859  | 1.870671  |
| 12               | 6                | 0              | -4.345070               | 2.765064  | -0.896153 |
| 13               | 6                | 0              | -6.293956               | 1.237664  | 1.055612  |
| 14               | 8                | 0              | -2.527194               | -0.276161 | -0.901877 |
| 15               | 6                | 0              | -1.669576               | -1.209617 | -0.713516 |
| 16               | 6                | 0              | -0.613221               | -1.455679 | -1.766938 |
| 17               | 6                | 0              | 0.469573                | -0.325616 | -1.733798 |
| 18               | 6                | 0              | 0.051764                | -2.830735 | -1.607876 |
| 19               | 6                | 0              | -0.045260               | 1.038172  | -2.191182 |
| 20               | 8                | 0              | 1.012436                | -0.267973 | -0.416570 |
| 21               | 14               | 0              | 2.599744                | 0.137473  | 0.088888  |
| 22               | 14               | 0              | 2.487841                | -0.494988 | 2.386751  |
| 23               | 14               | 0              | 3.080251                | 2.480299  | -0.104653 |
| 24               | 14               | 0              | 4.262220                | -1.148694 | -1.069501 |
| 25               | 6                | 0              | 1.651627                | -2.198208 | 2.525432  |
| 26               | 6                | 0              | 4.214758                | -0.606653 | 3.181154  |
| 27               | 6                | 0              | 1.450721                | 0.752901  | 3.378459  |
| 28               | 6                | 0              | 4.122122                | -1.040628 | -2.968207 |
| 29               | 6                | 0              | 5.984632                | -0.490600 | -0.588543 |
| 30               | 6                | 0              | 4.188066                | -2.991185 | -0.594169 |
| 31               | 6                | 0              | 1.582544                | 3.537256  | 0.400535  |
| 32               | 6                | 0              | 4.522910                | 2.902819  | 1.068010  |
| 33               | 6                | 0              | 3.617072                | 2.994611  | -1.859850 |
| 34               | 1                | 0              | -2.886569               | -3.904663 | -1.158040 |
| 35               | 1                | 0              | -3.496424               | -2.294133 | -1.807970 |

|    |   |   |           |           |           |
|----|---|---|-----------|-----------|-----------|
| 36 | 1 | 0 | -2.942230 | -3.263813 | 2.247408  |
| 37 | 1 | 0 | -3.255206 | -4.585127 | 1.084552  |
| 38 | 1 | 0 | -4.601052 | -3.716808 | 1.861859  |
| 39 | 1 | 0 | -2.846528 | 0.941517  | 1.722772  |
| 40 | 1 | 0 | -5.201053 | -0.533850 | -1.787360 |
| 41 | 1 | 0 | -5.560201 | 1.842453  | -2.435858 |
| 42 | 1 | 0 | -3.874154 | 1.346748  | -2.460984 |
| 43 | 1 | 0 | -7.198678 | 0.605389  | -0.811647 |
| 44 | 1 | 0 | -6.567923 | -0.713717 | 0.163022  |
| 45 | 1 | 0 | -3.369014 | 3.280563  | 0.971299  |
| 46 | 1 | 0 | -2.360328 | 2.363971  | -0.133573 |
| 47 | 1 | 0 | -4.948930 | 1.994850  | 2.579542  |
| 48 | 1 | 0 | -5.007816 | 0.240161  | 2.483384  |
| 49 | 1 | 0 | -3.887606 | 3.542856  | -1.525047 |
| 50 | 1 | 0 | -5.257973 | 3.218114  | -0.496396 |
| 51 | 1 | 0 | -7.138780 | 0.996141  | 1.716861  |
| 52 | 1 | 0 | -6.461061 | 2.273006  | 0.740698  |
| 53 | 1 | 0 | -1.418903 | -1.492076 | 0.311636  |
| 54 | 1 | 0 | -1.098709 | -1.389258 | -2.748686 |
| 55 | 1 | 0 | 1.248572  | -0.650653 | -2.440285 |
| 56 | 1 | 0 | 0.864329  | -2.942618 | -2.334687 |
| 57 | 1 | 0 | -0.660369 | -3.642779 | -1.774404 |
| 58 | 1 | 0 | 0.479738  | -2.947966 | -0.606747 |
| 59 | 1 | 0 | 0.783173  | 1.751127  | -2.248849 |
| 60 | 1 | 0 | -0.797173 | 1.431835  | -1.504047 |
| 61 | 1 | 0 | -0.495034 | 0.965663  | -3.188808 |
| 62 | 1 | 0 | 0.650928  | -2.182824 | 2.077915  |
| 63 | 1 | 0 | 1.542196  | -2.484639 | 3.580293  |
| 64 | 1 | 0 | 2.229974  | -2.983888 | 2.024823  |
| 65 | 1 | 0 | 4.117644  | -0.863159 | 4.244937  |
| 66 | 1 | 0 | 4.764495  | 0.340351  | 3.122507  |
| 67 | 1 | 0 | 4.834305  | -1.381920 | 2.713839  |
| 68 | 1 | 0 | 1.927212  | 1.739715  | 3.421993  |
| 69 | 1 | 0 | 0.452234  | 0.883213  | 2.944487  |
| 70 | 1 | 0 | 1.322135  | 0.402774  | 4.411788  |
| 71 | 1 | 0 | 3.223489  | -1.542617 | -3.346522 |
| 72 | 1 | 0 | 4.989277  | -1.533713 | -3.429321 |
| 73 | 1 | 0 | 4.102413  | -0.004848 | -3.327370 |
| 74 | 1 | 0 | 6.761085  | -1.124292 | -1.038731 |
| 75 | 1 | 0 | 6.145415  | -0.494456 | 0.496035  |
| 76 | 1 | 0 | 6.149748  | 0.532863  | -0.946658 |
| 77 | 1 | 0 | 4.397055  | -3.145302 | 0.471247  |
| 78 | 1 | 0 | 3.207572  | -3.433521 | -0.807045 |
| 79 | 1 | 0 | 4.938398  | -3.557177 | -1.163143 |
| 80 | 1 | 0 | 0.720066  | 3.376381  | -0.255775 |
| 81 | 1 | 0 | 1.843759  | 4.603346  | 0.351099  |
| 82 | 1 | 0 | 1.259685  | 3.320856  | 1.425535  |
| 83 | 1 | 0 | 4.796680  | 3.960193  | 0.950272  |
| 84 | 1 | 0 | 5.419268  | 2.306136  | 0.861258  |
| 85 | 1 | 0 | 4.255353  | 2.749837  | 2.120458  |
| 86 | 1 | 0 | 4.540529  | 2.489885  | -2.169170 |
| 87 | 1 | 0 | 2.852453  | 2.779937  | -2.615698 |
| 88 | 1 | 0 | 3.809574  | 4.075990  | -1.887533 |



## TS G

1,3-*syn*( $\phi = 60$ )

Method: B3LYP/6-31+G(d)

SCF Done: E(RB+HF-LYP) = -2394.49672589 A.U. after 9 cycles

Imaginary frequencies: 1(-246)

Zero-point correction= 0.764422 (Hartree/Particle)  
Thermal correction to Energy= 0.811772  
Thermal correction to Enthalpy= 0.812716  
Thermal correction to Gibbs Free Energy= 0.682435  
Sum of electronic and zero-point Energies= -2393.732304  
Sum of electronic and thermal Energies= -2393.684954  
Sum of electronic and thermal Enthalpies= -2393.684010  
Sum of electronic and thermal Free Energies= -2393.814291

Standard orientation:

| Center<br>Number | Atomic<br>Number | Atomic<br>Type | Coordinates (Angstroms) |           |           |
|------------------|------------------|----------------|-------------------------|-----------|-----------|
|                  |                  |                | X                       | Y         | Z         |
| 1                | 6                | 0              | -2.137059               | 2.249457  | 0.619387  |
| 2                | 6                | 0              | -3.451207               | 2.555894  | 0.303577  |
| 3                | 8                | 0              | -4.378584               | 1.667047  | 0.057721  |
| 4                | 6                | 0              | -3.901479               | 3.971902  | 0.052651  |
| 5                | 5                | 0              | -4.177190               | 0.173744  | -0.140831 |
| 6                | 6                | 0              | -5.303738               | -0.390577 | -1.145933 |
| 7                | 6                | 0              | -4.264157               | -0.674450 | 1.232232  |
| 8                | 6                | 0              | -3.979510               | -2.166217 | 0.922990  |
| 9                | 6                | 0              | -5.656510               | -0.410049 | 1.865580  |
| 10               | 6                | 0              | -5.017668               | -1.884691 | -1.445829 |
| 11               | 6                | 0              | -6.691450               | -0.121134 | -0.506924 |
| 12               | 6                | 0              | -4.843153               | -2.785124 | -0.200517 |
| 13               | 6                | 0              | -6.866586               | -0.656474 | 0.933703  |
| 14               | 8                | 0              | -2.738280               | 0.000774  | -0.746455 |
| 15               | 6                | 0              | -2.095531               | 0.974779  | -1.270599 |
| 16               | 6                | 0              | -0.647656               | 0.828952  | -1.669887 |
| 17               | 6                | 0              | 0.178197                | -0.148036 | -0.797848 |
| 18               | 6                | 0              | -0.587947               | 0.515655  | -3.184768 |
| 19               | 6                | 0              | -0.030343               | -1.628839 | -1.116231 |
| 20               | 8                | 0              | 1.543681                | 0.226621  | -0.986385 |
| 21               | 14               | 0              | 2.905893                | -0.062495 | 0.007405  |
| 22               | 14               | 0              | 4.176865                | 1.914591  | -0.406414 |
| 23               | 14               | 0              | 4.098027                | -2.002144 | -0.735664 |
| 24               | 14               | 0              | 2.372486                | -0.253608 | 2.336034  |
| 25               | 6                | 0              | 3.003475                | 3.411238  | -0.348042 |
| 26               | 6                | 0              | 5.556499                | 2.177408  | 0.879807  |
| 27               | 6                | 0              | 4.971942                | 1.869845  | -2.135891 |
| 28               | 6                | 0              | 1.079087                | -1.600200 | 2.707978  |
| 29               | 6                | 0              | 3.969989                | -0.726738 | 3.261377  |
| 30               | 6                | 0              | 1.738588                | 1.389163  | 3.061522  |
| 31               | 6                | 0              | 3.992819                | -2.137157 | -2.630064 |
| 32               | 6                | 0              | 5.929193                | -1.838889 | -0.233189 |
| 33               | 6                | 0              | 3.451916                | -3.634846 | 0.004357  |
| 34               | 1                | 0              | -1.437530               | 3.070164  | 0.749693  |
| 35               | 1                | 0              | -1.878501               | 1.316074  | 1.100885  |

|    |   |   |           |           |           |
|----|---|---|-----------|-----------|-----------|
| 36 | 1 | 0 | -4.260232 | 4.082239  | -0.978567 |
| 37 | 1 | 0 | -3.103598 | 4.694964  | 0.239684  |
| 38 | 1 | 0 | -4.748494 | 4.202149  | 0.710066  |
| 39 | 1 | 0 | -5.282831 | 0.145656  | -2.110646 |
| 40 | 1 | 0 | -3.512155 | -0.349342 | 1.970606  |
| 41 | 1 | 0 | -4.098531 | -2.772024 | 1.835634  |
| 42 | 1 | 0 | -2.920810 | -2.255802 | 0.640269  |
| 43 | 1 | 0 | -5.779802 | -1.019109 | 2.775317  |
| 44 | 1 | 0 | -5.678971 | 0.637770  | 2.197518  |
| 45 | 1 | 0 | -5.814853 | -2.306021 | -2.078963 |
| 46 | 1 | 0 | -4.097329 | -1.937437 | -2.046241 |
| 47 | 1 | 0 | -7.490269 | -0.539129 | -1.140374 |
| 48 | 1 | 0 | -6.848445 | 0.966347  | -0.498069 |
| 49 | 1 | 0 | -4.391542 | -3.738581 | -0.511288 |
| 50 | 1 | 0 | -5.827215 | -3.049306 | 0.199493  |
| 51 | 1 | 0 | -7.756587 | -0.188867 | 1.379246  |
| 52 | 1 | 0 | -7.090204 | -1.727720 | 0.901132  |
| 53 | 1 | 0 | -2.660392 | 1.721115  | -1.837860 |
| 54 | 1 | 0 | -0.189220 | 1.815153  | -1.531786 |
| 55 | 1 | 0 | -0.102115 | 0.029446  | 0.250595  |
| 56 | 1 | 0 | 0.458543  | 0.426600  | -3.492684 |
| 57 | 1 | 0 | -1.045035 | 1.323325  | -3.768107 |
| 58 | 1 | 0 | -1.107055 | -0.415887 | -3.432042 |
| 59 | 1 | 0 | 0.521993  | -2.247296 | -0.400767 |
| 60 | 1 | 0 | 0.337127  | -1.864777 | -2.120317 |
| 61 | 1 | 0 | -1.088389 | -1.898845 | -1.051499 |
| 62 | 1 | 0 | 2.207749  | 3.312736  | -1.096001 |
| 63 | 1 | 0 | 3.552553  | 4.338542  | -0.561074 |
| 64 | 1 | 0 | 2.527366  | 3.523061  | 0.633432  |
| 65 | 1 | 0 | 6.137584  | 3.074713  | 0.626671  |
| 66 | 1 | 0 | 6.256502  | 1.334193  | 0.920430  |
| 67 | 1 | 0 | 5.151557  | 2.324200  | 1.888672  |
| 68 | 1 | 0 | 5.736420  | 1.087892  | -2.219982 |
| 69 | 1 | 0 | 4.223197  | 1.690829  | -2.917116 |
| 70 | 1 | 0 | 5.457557  | 2.830769  | -2.354830 |
| 71 | 1 | 0 | 0.095848  | -1.368035 | 2.282848  |
| 72 | 1 | 0 | 0.950617  | -1.698558 | 3.794795  |
| 73 | 1 | 0 | 1.384297  | -2.580030 | 2.322173  |
| 74 | 1 | 0 | 3.775813  | -0.752573 | 4.342380  |
| 75 | 1 | 0 | 4.782464  | -0.010994 | 3.089718  |
| 76 | 1 | 0 | 4.333204  | -1.720302 | 2.971643  |
| 77 | 1 | 0 | 2.487979  | 2.185721  | 2.979252  |
| 78 | 1 | 0 | 0.826977  | 1.737957  | 2.561244  |
| 79 | 1 | 0 | 1.503053  | 1.265309  | 4.127393  |
| 80 | 1 | 0 | 2.956114  | -2.265727 | -2.963055 |
| 81 | 1 | 0 | 4.567668  | -3.003760 | -2.984119 |
| 82 | 1 | 0 | 4.391761  | -1.244983 | -3.126851 |
| 83 | 1 | 0 | 6.481819  | -2.740899 | -0.529352 |
| 84 | 1 | 0 | 6.050433  | -1.720805 | 0.850594  |
| 85 | 1 | 0 | 6.413477  | -0.983036 | -0.718610 |
| 86 | 1 | 0 | 3.522185  | -3.650090 | 1.098868  |
| 87 | 1 | 0 | 2.407463  | -3.830042 | -0.266477 |
| 88 | 1 | 0 | 4.050138  | -4.475248 | -0.374151 |

## TS H

1,3-*syn* ( $\phi = 180$ )

Method: B3LYP/6-31+G(d)

SCF Done: E(RB+HF-LYP) = -2394.48935655 A.U. after 8 cycles

Imaginary frequencies: 1(-202)

Zero-point correction= 0.764742 (Hartree/Particle)  
Thermal correction to Energy= 0.810884  
Thermal correction to Enthalpy= 0.811829  
Thermal correction to Gibbs Free Energy= 0.687466  
Sum of electronic and zero-point Energies= -2393.724615  
Sum of electronic and thermal Energies= -2393.678472  
Sum of electronic and thermal Enthalpies= -2393.677528  
Sum of electronic and thermal Free Energies= -2393.801890

Standard orientation:

| Center<br>Number | Atomic<br>Number | Atomic<br>Type | Coordinates (Angstroms) |           |           |
|------------------|------------------|----------------|-------------------------|-----------|-----------|
|                  |                  |                | X                       | Y         | Z         |
| 1                | 6                | 0              | 1.268734                | 2.375413  | 1.130420  |
| 2                | 6                | 0              | 2.537020                | 2.474760  | 0.609992  |
| 3                | 8                | 0              | 2.964109                | 1.644777  | -0.323133 |
| 4                | 6                | 0              | 3.541455                | 3.484329  | 1.105999  |
| 5                | 5                | 0              | 3.300709                | 0.168691  | -0.068962 |
| 6                | 6                | 0              | 4.712047                | -0.055707 | 0.692555  |
| 7                | 6                | 0              | 3.331252                | -0.665472 | -1.434972 |
| 8                | 6                | 0              | 3.490404                | -2.171091 | -1.100642 |
| 9                | 6                | 0              | 4.455569                | -0.084626 | -2.331663 |
| 10               | 6                | 0              | 4.879476                | -1.565322 | 1.014515  |
| 11               | 6                | 0              | 5.835447                | 0.523526  | -0.209406 |
| 12               | 6                | 0              | 4.686306                | -2.521834 | -0.185400 |
| 13               | 6                | 0              | 5.849249                | 0.002837  | -1.666287 |
| 14               | 8                | 0              | 2.079705                | -0.307446 | 0.805047  |
| 15               | 6                | 0              | 1.815437                | 0.254432  | 1.913766  |
| 16               | 6                | 0              | 0.604701                | -0.164283 | 2.721440  |
| 17               | 6                | 0              | -0.529492               | -0.818477 | 1.896551  |
| 18               | 6                | 0              | 1.151002                | -1.101531 | 3.831699  |
| 19               | 6                | 0              | -1.609198               | -1.407258 | 2.810295  |
| 20               | 8                | 0              | -1.072455               | 0.169003  | 1.019843  |
| 21               | 14               | 0              | -2.336949               | -0.006627 | -0.137123 |
| 22               | 14               | 0              | -1.886977               | 1.681173  | -1.778981 |
| 23               | 14               | 0              | -4.438066               | 0.492781  | 0.920139  |
| 24               | 14               | 0              | -2.383648               | -2.160608 | -1.198077 |
| 25               | 6                | 0              | -0.152752               | 1.516061  | -2.530832 |
| 26               | 6                | 0              | -3.133963               | 1.542564  | -3.212895 |
| 27               | 6                | 0              | -2.054539               | 3.418305  | -1.016702 |
| 28               | 6                | 0              | -2.420480               | -3.629660 | 0.016944  |
| 29               | 6                | 0              | -3.977147               | -2.264032 | -2.238776 |
| 30               | 6                | 0              | -0.899615               | -2.417439 | -2.358176 |
| 31               | 6                | 0              | -4.162174               | 1.820838  | 2.256105  |
| 32               | 6                | 0              | -5.688835               | 1.184805  | -0.340801 |
| 33               | 6                | 0              | -5.289765               | -1.002286 | 1.742684  |
| 34               | 1                | 0              | 0.955977                | 3.062352  | 1.912776  |

|    |   |   |           |           |           |
|----|---|---|-----------|-----------|-----------|
| 35 | 1 | 0 | 0.493019  | 1.800235  | 0.643039  |
| 36 | 1 | 0 | 4.423411  | 2.978764  | 1.517924  |
| 37 | 1 | 0 | 3.118143  | 4.152244  | 1.861856  |
| 38 | 1 | 0 | 3.890573  | 4.087117  | 0.258604  |
| 39 | 1 | 0 | 4.779505  | 0.481323  | 1.656600  |
| 40 | 1 | 0 | 2.386353  | -0.553489 | -1.989865 |
| 41 | 1 | 0 | 3.566444  | -2.765075 | -2.025633 |
| 42 | 1 | 0 | 2.564693  | -2.503545 | -0.606673 |
| 43 | 1 | 0 | 4.543690  | -0.667229 | -3.262835 |
| 44 | 1 | 0 | 4.147978  | 0.926372  | -2.633081 |
| 45 | 1 | 0 | 5.868420  | -1.752835 | 1.463176  |
| 46 | 1 | 0 | 4.146270  | -1.831934 | 1.791613  |
| 47 | 1 | 0 | 6.822172  | 0.337018  | 0.244651  |
| 48 | 1 | 0 | 5.714464  | 1.615381  | -0.235982 |
| 49 | 1 | 0 | 4.557222  | -3.545860 | 0.194985  |
| 50 | 1 | 0 | 5.605279  | -2.549679 | -0.779409 |
| 51 | 1 | 0 | 6.490463  | 0.662390  | -2.268894 |
| 52 | 1 | 0 | 6.334481  | -0.978212 | -1.698852 |
| 53 | 1 | 0 | 2.638509  | 0.680404  | 2.492604  |
| 54 | 1 | 0 | 0.198943  | 0.731969  | 3.207339  |
| 55 | 1 | 0 | -0.088183 | -1.625344 | 1.293184  |
| 56 | 1 | 0 | 0.399170  | -1.266905 | 4.607734  |
| 57 | 1 | 0 | 2.029559  | -0.662626 | 4.318060  |
| 58 | 1 | 0 | 1.447384  | -2.073268 | 3.419912  |
| 59 | 1 | 0 | -2.439696 | -1.794239 | 2.215701  |
| 60 | 1 | 0 | -2.002831 | -0.644326 | 3.493113  |
| 61 | 1 | 0 | -1.224834 | -2.242964 | 3.403618  |
| 62 | 1 | 0 | 0.649437  | 1.577238  | -1.788865 |
| 63 | 1 | 0 | 0.006020  | 2.325569  | -3.257354 |
| 64 | 1 | 0 | -0.032254 | 0.567103  | -3.066097 |
| 65 | 1 | 0 | -2.966790 | 2.370177  | -3.915895 |
| 66 | 1 | 0 | -4.176946 | 1.595162  | -2.882941 |
| 67 | 1 | 0 | -3.006068 | 0.609671  | -3.775054 |
| 68 | 1 | 0 | -3.061544 | 3.604997  | -0.624267 |
| 69 | 1 | 0 | -1.340577 | 3.572370  | -0.199047 |
| 70 | 1 | 0 | -1.850603 | 4.181053  | -1.780785 |
| 71 | 1 | 0 | -1.508328 | -3.698843 | 0.621248  |
| 72 | 1 | 0 | -2.504545 | -4.564154 | -0.555134 |
| 73 | 1 | 0 | -3.276167 | -3.585867 | 0.701043  |
| 74 | 1 | 0 | -3.998336 | -3.219115 | -2.781394 |
| 75 | 1 | 0 | -4.045620 | -1.462284 | -2.983045 |
| 76 | 1 | 0 | -4.880199 | -2.220726 | -1.617682 |
| 77 | 1 | 0 | -0.913192 | -1.711420 | -3.196837 |
| 78 | 1 | 0 | 0.059957  | -2.296771 | -1.841916 |
| 79 | 1 | 0 | -0.926056 | -3.431590 | -2.780100 |
| 80 | 1 | 0 | -3.475351 | 1.475061  | 3.037400  |
| 81 | 1 | 0 | -5.114849 | 2.079664  | 2.738112  |
| 82 | 1 | 0 | -3.740719 | 2.739771  | 1.831335  |
| 83 | 1 | 0 | -6.645940 | 1.373898  | 0.164459  |
| 84 | 1 | 0 | -5.885900 | 0.486890  | -1.163653 |
| 85 | 1 | 0 | -5.356716 | 2.133258  | -0.778617 |
| 86 | 1 | 0 | -5.479784 | -1.811684 | 1.027364  |
| 87 | 1 | 0 | -4.709756 | -1.419641 | 2.573550  |
| 88 | 1 | 0 | -6.262033 | -0.689146 | 2.147780  |

-----  
**TS I**

1,3-*anti*( $\phi = -60$ )

Method: B3LYP/6-31+G(d)

SCF Done: E(RB+HF-LYP) = -2394.49597828 A.U. after 8 cycles

Imaginary frequencies: 1(-263)

Zero-point correction= 0.764812 (Hartree/Particle)

Thermal correction to Energy= 0.811995

Thermal correction to Enthalpy= 0.812939

Thermal correction to Gibbs Free Energy= 0.684192

Sum of electronic and zero-point Energies= -2393.731166

Sum of electronic and thermal Energies= -2393.683983

Sum of electronic and thermal Enthalpies= -2393.683039

Sum of electronic and thermal Free Energies= -2393.811786

Standard orientation:

-----

| Center<br>Number | Atomic<br>Number | Atomic<br>Type | Coordinates (Angstroms) |           |           |
|------------------|------------------|----------------|-------------------------|-----------|-----------|
|                  |                  |                | X                       | Y         | Z         |
| 1                | 6                | 0              | -2.685681               | 2.484877  | -1.463728 |
| 2                | 6                | 0              | -3.128991               | 2.558096  | -0.149689 |
| 3                | 8                | 0              | -3.778742               | 1.605169  | 0.460808  |
| 4                | 6                | 0              | -2.745536               | 3.697611  | 0.758934  |
| 5                | 5                | 0              | -3.990554               | 0.186900  | -0.052646 |
| 6                | 6                | 0              | -5.342656               | 0.015498  | -0.924653 |
| 7                | 6                | 0              | -4.081952               | -0.825131 | 1.201190  |
| 8                | 6                | 0              | -4.169005               | -2.280543 | 0.675036  |
| 9                | 6                | 0              | -5.280968               | -0.390680 | 2.082957  |
| 10               | 6                | 0              | -5.414425               | -1.441637 | -1.448282 |
| 11               | 6                | 0              | -6.543554               | 0.438227  | -0.038631 |
| 12               | 6                | 0              | -5.281376               | -2.539529 | -0.367795 |
| 13               | 6                | 0              | -6.631477               | -0.260377 | 1.339011  |
| 14               | 8                | 0              | -2.770927               | -0.138471 | -0.963686 |
| 15               | 6                | 0              | -1.677418               | 0.531742  | -0.946921 |
| 16               | 6                | 0              | -0.658068               | 0.247429  | -2.039312 |
| 17               | 6                | 0              | 0.739357                | 0.826010  | -1.709495 |
| 18               | 6                | 0              | -0.582959               | -1.272697 | -2.301770 |
| 19               | 6                | 0              | 0.802246                | 2.355261  | -1.718928 |
| 20               | 8                | 0              | 1.146876                | 0.310389  | -0.442085 |
| 21               | 14               | 0              | 2.714172                | -0.105975 | 0.115073  |
| 22               | 14               | 0              | 2.182705                | -1.346039 | 2.085069  |
| 23               | 14               | 0              | 4.022096                | 1.825833  | 0.681788  |
| 24               | 14               | 0              | 3.904785                | -1.467190 | -1.462494 |
| 25               | 6                | 0              | 0.775321                | -2.564816 | 1.708341  |
| 26               | 6                | 0              | 3.691132                | -2.326185 | 2.708180  |
| 27               | 6                | 0              | 1.605226                | -0.187206 | 3.480277  |
| 28               | 6                | 0              | 4.045333                | -0.677825 | -3.192738 |
| 29               | 6                | 0              | 5.678567                | -1.720059 | -0.814070 |
| 30               | 6                | 0              | 3.104751                | -3.181025 | -1.675204 |
| 31               | 6                | 0              | 2.942915                | 3.157168  | 1.509318  |
| 32               | 6                | 0              | 5.380276                | 1.315570  | 1.917370  |
| 33               | 6                | 0              | 4.894985                | 2.610067  | -0.820594 |

-----

|    |   |   |           |           |           |
|----|---|---|-----------|-----------|-----------|
| 34 | 1 | 0 | -3.197337 | 1.872963  | -2.194381 |
| 35 | 1 | 0 | -2.118433 | 3.323982  | -1.854638 |
| 36 | 1 | 0 | -2.132690 | 3.330760  | 1.592170  |
| 37 | 1 | 0 | -3.652784 | 4.130065  | 1.197447  |
| 38 | 1 | 0 | -2.202637 | 4.482724  | 0.226638  |
| 39 | 1 | 0 | -5.352090 | 0.674545  | -1.808901 |
| 40 | 1 | 0 | -3.177736 | -0.760938 | 1.831114  |
| 41 | 1 | 0 | -4.299504 | -2.982242 | 1.514547  |
| 42 | 1 | 0 | -3.199835 | -2.531998 | 0.220113  |
| 43 | 1 | 0 | -5.406945 | -1.089089 | 2.925949  |
| 44 | 1 | 0 | -5.031734 | 0.582340  | 2.528662  |
| 45 | 1 | 0 | -6.354355 | -1.600431 | -2.001083 |
| 46 | 1 | 0 | -4.606538 | -1.573636 | -2.182434 |
| 47 | 1 | 0 | -7.489877 | 0.275502  | -0.579304 |
| 48 | 1 | 0 | -6.471624 | 1.523226  | 0.124777  |
| 49 | 1 | 0 | -5.087684 | -3.502657 | -0.862385 |
| 50 | 1 | 0 | -6.240702 | -2.666375 | 0.144359  |
| 51 | 1 | 0 | -7.333487 | 0.298572  | 1.974767  |
| 52 | 1 | 0 | -7.079659 | -1.252069 | 1.218126  |
| 53 | 1 | 0 | -1.303672 | 0.895858  | 0.011693  |
| 54 | 1 | 0 | -1.005971 | 0.721955  | -2.966221 |
| 55 | 1 | 0 | 1.416860  | 0.455797  | -2.493215 |
| 56 | 1 | 0 | 0.104331  | -1.468203 | -3.133409 |
| 57 | 1 | 0 | -1.566168 | -1.669938 | -2.564460 |
| 58 | 1 | 0 | -0.219875 | -1.806877 | -1.418961 |
| 59 | 1 | 0 | 1.835962  | 2.692209  | -1.593998 |
| 60 | 1 | 0 | 0.205881  | 2.782027  | -0.907329 |
| 61 | 1 | 0 | 0.432027  | 2.754532  | -2.671038 |
| 62 | 1 | 0 | -0.115332 | -2.043794 | 1.338873  |
| 63 | 1 | 0 | 0.488678  | -3.107303 | 2.619503  |
| 64 | 1 | 0 | 1.062940  | -3.309321 | 0.956278  |
| 65 | 1 | 0 | 3.434868  | -2.851556 | 3.638175  |
| 66 | 1 | 0 | 4.551467  | -1.680618 | 2.921804  |
| 67 | 1 | 0 | 4.012521  | -3.083525 | 1.982818  |
| 68 | 1 | 0 | 2.399650  | 0.494747  | 3.807082  |
| 69 | 1 | 0 | 0.746039  | 0.420881  | 3.172502  |
| 70 | 1 | 0 | 1.296020  | -0.777034 | 4.353982  |
| 71 | 1 | 0 | 3.082296  | -0.649259 | -3.716541 |
| 72 | 1 | 0 | 4.734152  | -1.270239 | -3.810998 |
| 73 | 1 | 0 | 4.435150  | 0.346012  | -3.152712 |
| 74 | 1 | 0 | 6.219835  | -2.405205 | -1.480796 |
| 75 | 1 | 0 | 5.699442  | -2.155201 | 0.191830  |
| 76 | 1 | 0 | 6.243142  | -0.780354 | -0.783151 |
| 77 | 1 | 0 | 3.093424  | -3.747289 | -0.736153 |
| 78 | 1 | 0 | 2.070656  | -3.110512 | -2.032195 |
| 79 | 1 | 0 | 3.670110  | -3.770842 | -2.409772 |
| 80 | 1 | 0 | 2.177265  | 3.545680  | 0.828307  |
| 81 | 1 | 0 | 3.565360  | 4.004264  | 1.828561  |
| 82 | 1 | 0 | 2.429820  | 2.767017  | 2.396096  |
| 83 | 1 | 0 | 6.017854  | 2.180547  | 2.145696  |
| 84 | 1 | 0 | 6.028370  | 0.524251  | 1.522027  |
| 85 | 1 | 0 | 4.959416  | 0.959329  | 2.865118  |
| 86 | 1 | 0 | 5.600328  | 1.912521  | -1.288647 |
| 87 | 1 | 0 | 4.191612  | 2.938716  | -1.595352 |

88 1 0 5.467437 3.492409 -0.502941

---

### TS J

1,3-*anti*( $\phi = 60$ )

Method: B3LYP/6-31+G(d)

SCF Done: E(RB+HF-LYP) = -2394.49729675 A.U. after 8 cycles

Imaginary frequencies: 1(-226)

Zero-point correction= 0.764861 (Hartree/Particle)

Thermal correction to Energy= 0.812047

Thermal correction to Enthalpy= 0.812991

Thermal correction to Gibbs Free Energy= 0.683643

Sum of electronic and zero-point Energies= -2393.732435

Sum of electronic and thermal Energies= -2393.685249

Sum of electronic and thermal Enthalpies= -2393.684305

Sum of electronic and thermal Free Energies= -2393.813653

Standard orientation:

---

| Center<br>Number | Atomic<br>Number | Atomic<br>Type | Coordinates (Angstroms) |           |           |
|------------------|------------------|----------------|-------------------------|-----------|-----------|
|                  |                  |                | X                       | Y         | Z         |
| 1                | 6                | 0              | 2.077507                | 1.889881  | 0.771210  |
| 2                | 6                | 0              | 3.223769                | 2.370796  | 0.152380  |
| 3                | 8                | 0              | 4.263255                | 1.643376  | -0.157812 |
| 4                | 6                | 0              | 3.311727                | 3.783229  | -0.367339 |
| 5                | 5                | 0              | 4.371122                | 0.126195  | -0.092529 |
| 6                | 6                | 0              | 4.932856                | -0.412342 | 1.323278  |
| 7                | 6                | 0              | 5.364295                | -0.396618 | -1.251404 |
| 8                | 6                | 0              | 5.361396                | -1.947256 | -1.258294 |
| 9                | 6                | 0              | 6.757509                | 0.239405  | -1.018494 |
| 10               | 6                | 0              | 4.914827                | -1.962362 | 1.305588  |
| 11               | 6                | 0              | 6.335285                | 0.212717  | 1.550350  |
| 12               | 6                | 0              | 5.641525                | -2.616898 | 0.107653  |
| 13               | 6                | 0              | 7.346755                | 0.021417  | 0.395408  |
| 14               | 8                | 0              | 2.927649                | -0.424008 | -0.309323 |
| 15               | 6                | 0              | 2.004341                | 0.274262  | -0.855266 |
| 16               | 6                | 0              | 0.622105                | -0.321552 | -0.927117 |
| 17               | 6                | 0              | -0.533119               | 0.713417  | -1.003898 |
| 18               | 6                | 0              | 0.623162                | -1.299873 | -2.129041 |
| 19               | 6                | 0              | -0.426104               | 1.693215  | -2.174373 |
| 20               | 8                | 0              | -1.759532               | -0.005047 | -1.123458 |
| 21               | 14               | 0              | -3.069733               | -0.100606 | -0.024553 |
| 22               | 14               | 0              | -4.613948               | -1.415312 | -1.282954 |
| 23               | 14               | 0              | -3.993666               | 2.053378  | 0.475496  |
| 24               | 14               | 0              | -2.428301               | -1.239743 | 1.984717  |
| 25               | 6                | 0              | -3.671299               | -2.821797 | -2.146276 |
| 26               | 6                | 0              | -5.954971               | -2.170401 | -0.162525 |
| 27               | 6                | 0              | -5.473228               | -0.370940 | -2.621066 |
| 28               | 6                | 0              | -0.964309               | -0.397487 | 2.866381  |
| 29               | 6                | 0              | -3.886683               | -1.267943 | 3.209560  |
| 30               | 6                | 0              | -1.918835               | -3.036117 | 1.610833  |
| 31               | 6                | 0              | -4.199956               | 3.122247  | -1.086407 |

---

|    |   |   |           |           |           |
|----|---|---|-----------|-----------|-----------|
| 32 | 6 | 0 | -5.719927 | 1.811021  | 1.246174  |
| 33 | 6 | 0 | -2.941699 | 3.050082  | 1.713916  |
| 34 | 1 | 0 | 2.104789  | 1.023335  | 1.418072  |
| 35 | 1 | 0 | 1.271285  | 2.595134  | 0.950215  |
| 36 | 1 | 0 | 3.480360  | 3.781994  | -1.451527 |
| 37 | 1 | 0 | 4.176680  | 4.280729  | 0.087922  |
| 38 | 1 | 0 | 2.413324  | 4.361981  | -0.138426 |
| 39 | 1 | 0 | 4.300386  | -0.092145 | 2.168063  |
| 40 | 1 | 0 | 5.021116  | -0.066796 | -2.247910 |
| 41 | 1 | 0 | 6.088195  | -2.326105 | -1.994755 |
| 42 | 1 | 0 | 4.374191  | -2.279543 | -1.611824 |
| 43 | 1 | 0 | 7.477158  | -0.133968 | -1.764754 |
| 44 | 1 | 0 | 6.666524  | 1.319860  | -1.197476 |
| 45 | 1 | 0 | 5.344511  | -2.357977 | 2.239855  |
| 46 | 1 | 0 | 3.863816  | -2.284629 | 1.296137  |
| 47 | 1 | 0 | 6.779356  | -0.180673 | 2.478879  |
| 48 | 1 | 0 | 6.195705  | 1.290772  | 1.715598  |
| 49 | 1 | 0 | 5.348669  | -3.675394 | 0.050000  |
| 50 | 1 | 0 | 6.720117  | -2.626651 | 0.295027  |
| 51 | 1 | 0 | 8.185242  | 0.717762  | 0.541331  |
| 52 | 1 | 0 | 7.788547  | -0.978558 | 0.458203  |
| 53 | 1 | 0 | 2.289263  | 0.984498  | -1.636000 |
| 54 | 1 | 0 | 0.475098  | -0.912268 | -0.015781 |
| 55 | 1 | 0 | -0.525011 | 1.284779  | -0.065520 |
| 56 | 1 | 0 | -0.376079 | -1.727461 | -2.246012 |
| 57 | 1 | 0 | 1.340934  | -2.107531 | -1.958133 |
| 58 | 1 | 0 | 0.894775  | -0.798756 | -3.065342 |
| 59 | 1 | 0 | -1.280901 | 2.376097  | -2.163420 |
| 60 | 1 | 0 | -0.435645 | 1.164430  | -3.132999 |
| 61 | 1 | 0 | 0.486598  | 2.297356  | -2.113751 |
| 62 | 1 | 0 | -2.911175 | -2.423579 | -2.828451 |
| 63 | 1 | 0 | -4.362195 | -3.439508 | -2.736074 |
| 64 | 1 | 0 | -3.164928 | -3.477865 | -1.428579 |
| 65 | 1 | 0 | -6.677326 | -2.732397 | -0.770033 |
| 66 | 1 | 0 | -6.515490 | -1.406355 | 0.389761  |
| 67 | 1 | 0 | -5.530850 | -2.868190 | 0.569759  |
| 68 | 1 | 0 | -6.118928 | 0.402429  | -2.187673 |
| 69 | 1 | 0 | -4.744824 | 0.125466  | -3.273394 |
| 70 | 1 | 0 | -6.103826 | -1.011065 | -3.253069 |
| 71 | 1 | 0 | -0.057618 | -0.386847 | 2.250574  |
| 72 | 1 | 0 | -0.723233 | -0.942194 | 3.789613  |
| 73 | 1 | 0 | -1.190141 | 0.638723  | 3.144621  |
| 74 | 1 | 0 | -3.620280 | -1.871044 | 4.088236  |
| 75 | 1 | 0 | -4.794476 | -1.702010 | 2.774739  |
| 76 | 1 | 0 | -4.135928 | -0.261919 | 3.568532  |
| 77 | 1 | 0 | -2.750591 | -3.625112 | 1.205833  |
| 78 | 1 | 0 | -1.094292 | -3.086949 | 0.889066  |
| 79 | 1 | 0 | -1.581150 | -3.531434 | 2.531446  |
| 80 | 1 | 0 | -3.234742 | 3.419146  | -1.512853 |
| 81 | 1 | 0 | -4.743489 | 4.043545  | -0.835392 |
| 82 | 1 | 0 | -4.764107 | 2.606159  | -1.871480 |
| 83 | 1 | 0 | -6.135416 | 2.785435  | 1.537354  |
| 84 | 1 | 0 | -5.694277 | 1.182649  | 2.144288  |
| 85 | 1 | 0 | -6.423301 | 1.353158  | 0.539874  |



|    |   |   |           |          |          |
|----|---|---|-----------|----------|----------|
| 86 | 1 | 0 | -2.859147 | 2.546108 | 2.684447 |
| 87 | 1 | 0 | -1.924081 | 3.227408 | 1.344117 |
| 88 | 1 | 0 | -3.402268 | 4.031772 | 1.891204 |

---

## General Procedures

All non-aqueous reactions were carried out under an atmosphere of nitrogen in flame-dried glassware and were stirred using a magnetic stir plate. All reactions were carried out using anhydrous solvent unless otherwise noted. Anhydrous CH<sub>2</sub>Cl<sub>2</sub>, THF, Et<sub>2</sub>O, and toluene were dried using an M BRAUN solvent system (A2 alumina). Yields refer to chromatographically and spectroscopically (<sup>1</sup>H NMR) homogenous materials unless noted otherwise. (*S*)-2-methyl butanal,<sup>17</sup> (*S*)-2-phenyl propanal,<sup>18</sup> *N*-benzyl, *N*-tosyl (*S*)-2-aminopropanal<sup>19</sup> 3-*t*-Butyldimethylsiloxy propanal<sup>20</sup> (*R*)-3-benzyloxy-2-methyl propanal<sup>21</sup> were prepared according to literature procedures. All other aldehydes were obtained from Sigma Aldrich and distilled prior to use.

Triflimide (HNTf<sub>2</sub>) was obtained from Sigma Aldrich and manipulated in a N<sub>2</sub> atmosphere glovebox. Dimethyl aluminum triflimide (Me<sub>2</sub>AlNTf<sub>2</sub>) was prepared from Me<sub>3</sub>Al and HNTf<sub>2</sub> according to the literature procedure.<sup>22</sup> Pentafluorophenylbis(triflyl)methide C<sub>6</sub>F<sub>5</sub>CH(Tf)<sub>2</sub><sup>23</sup> was prepared according to the literature procedure. BF<sub>3</sub>OEt<sub>2</sub>, LiHMDS (1.0 M toluene), 9-BBNOTf (0.5 M hexanes), Bu<sub>2</sub>BOTf (1.0 M CH<sub>2</sub>Cl<sub>2</sub>), (*c*-Hex)<sub>2</sub>BCl, (+)DIPCl, (-) DIPCl were obtained from Sigma Aldrich. Acetone TMS enol ether (isopropenyloxy trimethylsilane) was obtained from Sigma Aldrich. L-PTZ (L-proline tetrazole, (*S*)-(-)-5-(2-Pyrrolidinyl)-1*H*-tetrazole) was obtained from Chiro Technology (Japan). The *R*-enantiomer (D-PTZ) was synthesized from D-proline according to published procedures.<sup>24</sup> All other reagents were obtained from commercial sources.

All reactions were monitored by thin layer chromatography (TLC) on Whatman Partisil<sup>®</sup> K6F TLC plates (silica gel 60 Å, 0.25 mm thickness) and visualized using a UV lamp (366 or 254 nm) or by use of one of the following visualization reagents: PMA: 10 g phosphomolybdic acid/ 100 mL ethanol; KMnO<sub>4</sub>: 0.75 g potassium permanganate, 5 g K<sub>2</sub>CO<sub>3</sub>, / 100mL water; ANIS: 10% v/v concentrated H<sub>2</sub>SO<sub>4</sub> and 6% v/v *p*-anisaldehyde in ethanol. Products were isolated by flash chromatography (Zeochem<sup>®</sup> Zeoprep 60 Eco<sup>®</sup> silica gel 43-60 μm) or by automated flash chromatography using a Biotage<sup>®</sup> Isolera One<sup>®</sup> system (UV detector), using SNAP<sup>®</sup> cartridges.

Middle infrared spectra were recorded as thin films on polished sodium chloride plates using a Nicolet 6700 FTIR spectrometer unless otherwise noted. <sup>13</sup>C, and <sup>1</sup>H NMR

<sup>17</sup> Anelli, P.; Montanari, F.; Quici, S. *Org. Synth.* **1990**, *69*, 212, *Org. Synth.* **1993**, *Coll. Vol. 8*, 367

<sup>18</sup> Vogt, M.; Ceylan, S.; Kirschning, A. *Tetrahedron*, **2010**, *66*, 6450-6456

<sup>19</sup> Preparation of alanine methyl ester hydrochloride: *Eur. J. Org. Chem.*, **2010**, *22*, 4276. Conversion to *N*-tosyl 2-aminopropanal: *Tetrahedron*, **1998**, *54*, 6051. Product was recrystallized from boiling hexanes/ethyl acetate.

<sup>20</sup> W. H. Pearson, J. E. Kropf, A. L. Choy, Ill, Y. Lee, J.W. Kampf *J. Org. Chem.* **2007**, *72*, 4135.

<sup>21</sup> Kawabata, T.; Kimura, Y.; Ito, Y.; Terashima, S. *Tetrahedron* **1988**, *44*, 2149

<sup>22</sup> Marx, A.; Yamamoto, H. *Angew. Chem. Int. Ed.* **2000**, *39*, 178.

<sup>23</sup> A. Hasegawa, K. Ishihara, H. Yamamoto, *Angew. Chem.* **2003**, *115*, 5909–5911;

<sup>24</sup> *Org. Syn* **2008**, *85*, 72.

spectra were recorded on a Bruker Avance Model DRX 500 or DRX 400. Chemical shift values ( $\delta$ ) are reported in ppm and calibrated to the residual solvent peak  $\text{CDCl}_3$   $\delta = 7.26$  ppm, for  $^1\text{H}$ ,  $\delta = 77.16$  for  $^{13}\text{C}$ ;  $\text{C}_6\text{D}_6$   $\delta = 7.16$  ppm for  $^1\text{H}$ ,  $\delta = 128.0$  ppm for  $^{13}\text{C}$ , or calibrated to tetramethyl silane ( $\delta = 0.00$ ). Diastereomeric ratios were determined by  $^1\text{H}$  NMR integration of the unpurified reaction mixture. When noted, the diastereomeric ratio could not be determined by  $^1\text{H}$  NMR analysis of the crude mixture and instead given after silica gel flash chromatography. Integral values were determined using standard, uncalibrated NMR experiments and should be viewed accordingly. All NMR spectra were recorded at ambient temperature (290 K) unless otherwise noted.  $^1\text{H}$  NMR spectra are reported as follows: chemical shift (multiplicity, coupling constant, integration). The following abbreviations are used to indicate multiplicities: s, singlet; d, doublet; t, triplet; q, quartet; quint, quintet; m, multiplet; br, broad; app, apparent.

### Synthetic Procedures and Data for compounds 1 (Tables 1,2, 3).

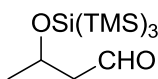

#### 1a

##### General procedure 1 (GP 1)

To a stirring solution of  $\text{CH}_2\text{Cl}_2$  (3 mL) at  $0^\circ\text{C}$  was added triflic acid (0.28 mL, 3.15 mmol, 1.05 equiv.). Tris(trimethylsilyl)silane was added dropwise over 2 min and gas evolution was observed. The reaction mixture was warmed to ambient temperature and stirred for one hour before being re-cooled to  $0^\circ\text{C}$ .  $\text{CH}_2\text{Cl}_2$  (5 mL) was added, followed by *i*- $\text{Pr}_2\text{NEt}$  (0.78 mL, 4.5 mmol, 1.5 equiv.). (*R*) – ethyl 3-hydroxy-butarate was added in one portion (0.39 mL, 3 mmol, 1.0 equiv.) The reaction was stirred for one hour at ambient temperature and quenched by addition of 5 mL saturated aqueous  $\text{NaHCO}_3$ . The mixture was diluted with hexanes (40 mL) and the layers were separated. The organic layer was washed consecutively with saturated aqueous  $\text{NH}_4\text{Cl}$  (20 mL),  $\text{H}_2\text{O}$  (20 mL) and brine (20 mL), and was dried over anhydrous  $\text{MgSO}_4$ . The organic layer was filtered and concentrated under reduced pressure. The material was sufficiently pure and was used without further purification.

A stirring solution of the methyl ester (3 mmol) in  $\text{CH}_2\text{Cl}_2$  (30 mL) was cooled to  $-85^\circ\text{C}$ . Diisobutylaluminum hydride (3.75 mL, 1.0 M hexanes, 1.25 equiv.) was added slowly over 10 min. The temperature was maintained at  $-78^\circ\text{C}$  for 1 hour then cooled to  $-90^\circ\text{C}$ . The reaction was quenched by slow addition of a mixture of  $\text{Et}_2\text{O}$  (2 mL) and  $\text{MeOH}$  (1 mL). The mixture was stirred vigorously and allowed to warm to ambient temperature, whereupon saturated aqueous  $\text{NaK}$ (tartate) was added (30 mL). The biphasic mixture was stirred for 2 hr, then diluted with 60 mL hexanes. The layers were separated and the organic layer was washed consecutively with saturated aqueous  $\text{NaHCO}_3$  (20 mL) and brine (20 mL), followed by drying over  $\text{MgSO}_4$  followed by filtration and concentration under reduced pressure. The crude material was purified by flash chromatography on silica gel (25g, 1-5%  $\text{Et}_2\text{O}$ /hexanes) to yield the product as a waxy solid (0.91 g, 90% yield for 2 steps).

**Data for 1a:** TLC:  $R_f = 0.27$  (10:90  $\text{EtOAc}$ /hexanes);  $^{13}\text{C}$  NMR (500 MHz,  $\text{CDCl}_3$ , 295K),  $\delta = 202.26, 68.93, 53.00, 23.91, 0.5$ ;  $^1\text{H}$  NMR (500 MHz,  $\text{CDCl}_3$ , 295K),  $\delta =$

9.77 (t,  $J=2.4$  Hz, 1 H), 4.03 (sxt,  $J=6.0$  Hz, 1 H), 2.44 - 2.48 (m, 2 H), 1.21 (d,  $J=6.1$  Hz, 3 H), 0.19 (s, 27 H); LRMS (API-ES +):  $C_{13}H_{35}O_2Si_4^+$   $[M+H]^+$   $m/z = 335.2$  (100%); FTIR (thin film): 2944, 2868, 2722, 1728, 1464, 1117, 1032, 883, 680; colorless oil.

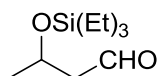

**1b**

Prepared according to GP using commercial TESOTf

**Data for 1b:** TLC:  $R_f = 0.38$  (10:90 EtOAc/Hexanes);  $^{13}C$  NMR (500 MHz,  $CDCl_3$ , 295K)  $\delta = 202.31, 64.45, 53.21, 24.40, 6.92, 4.98$ ;  $^1H$  NMR (500 MHz,  $CDCl_3$ , 295K)  $\delta = 9.80$  (t,  $J=2.4$  Hz, 1 H), 4.36 (sxt,  $J=6.1$  Hz, 1 H), 2.57 (ddd,  $J=15.9, 6.7, 3.1$  Hz, 1 H), 2.47 (ddd,  $J=15.6, 5.2, 1.8$  Hz, 1 H), 1.25 (d,  $J=6.1$  Hz, 3 H), 0.95 (t,  $J=7.9$  Hz, 6 H), 0.60 (q,  $J=7.7$  Hz, 6 H); LRMS (API-ES +):  $C_{11}H_{30}NO_3Si^+$   $[M + NH_4 + MeOH]^+$   $m/z = 252.1$  (85%); FTIR (thin film): 2957, 2978, 2827, 2723, 1730, 1457, 1376, 1135, 1016, 744; colorless oil

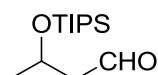

Prepared according to GP using commercial TESOTf

**1c<sup>25</sup>**

**Data for 1c** TLC:  $R_f = 0.39$  (10:90 EtOAc/Hexanes);  $^{13}C$  NMR (500 MHz,  $CDCl_3$ , 295K),  $\delta = 202.48, 64.93, 53.36, 24.45, 18.18, 12.50$ ;  $^1H$  NMR (500 MHz,  $CDCl_3$ , 295K),  $\delta = 9.86$  (t,  $J=2.4$  Hz, 1 H), 4.46 (sxt,  $J=5.9$  Hz, 1 H), 2.56 (app dd,  $J=5.8, 2.4$  Hz, 2 H), 1.29 (d,  $J=6.1$  Hz, 3 H), 1.02 - 1.08 (m, 21 H); LRMS (API-ES +):  $C_{13}H_{29}O_2Si^+$   $[M+H]^+$   $m/z = 245.2$  (100%); FTIR (thin film): 2950, 2894, 2823, 2719, 1729, 1374, 1245, 1111, 1011, 834, 687; colorless oil

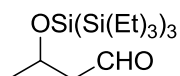

**1d**

Synthesized and used *in situ*

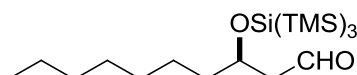

**1e**

Previously described compound

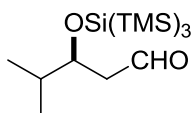

**1f**

Generated and used *in situ*

<sup>25</sup> Silylation of ethyl 3-hydroxybutanoate: *J. Org. Chem.*, **1989**, *54*, 3792. Reduction of ester to aldehyde: *J. Am. Chem. Soc.*, **2000**, *122*, 3792.

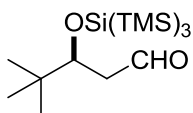

**1g**

Generated and used *in situ*

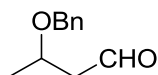

**1h**

$^{13}\text{C}$  NMR (500 MHz,  $\text{CDCl}_3$ ):  $\delta$  = 201.62, 138.32, 128.57, 127.83, 77.07, 70.37, 50.64, 19.94;  $^1\text{H}$  NMR (500 MHz,  $\text{CDCl}_3$ ):  $\delta$  = 9.79 (t,  $J$ =2.1 Hz, 1 H), 4.61 (d,  $J$ =11.6 Hz, 1 H), 4.48 (d,  $J$ =11.6 Hz, 1 H), 4.05 - 4.13 (m, 1 H), 2.71 (ddd,  $J$ =16.2, 7.3, 2.4 Hz, 1 H), 2.52 (ddd,  $J$ =16.5, 4.9, 1.8 Hz, 1 H), 1.30 (d,  $J$ =6.1 Hz, 3 H); LRMS (API-ES +):  $m/z$  = 193.2 (100%); FTIR (thin film): 3064, 2973, 2727, 1725, 1377, 1098, 1060, 738, 698; colorless oil

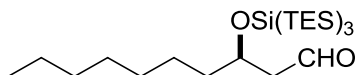

**1i**

Prepared according to **Scheme S-7**.

**Scheme S-7:**

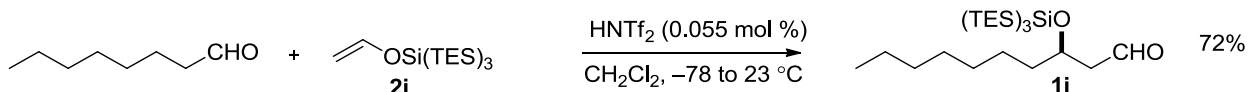

### General Procedure 2 (GP 2)

A dry 25mL round bottomed flask with magnetic stir bar was charged with **2i** (1.14, 2.72 mmol), fitted with a septum and purged with  $\text{N}_2$ .  $\text{CH}_2\text{Cl}_2$  (7.0 mL) and octanal (430 $\mu\text{L}$ ) were added sequentially, stirred and cooled to  $-78^\circ\text{C}$  in a dry ice/acetone bath.  $\text{HNTf}_2$  (150 $\mu\text{L}$ , 0.010 M  $\text{CH}_2\text{Cl}_2$ ,  $1.5 \times 10^{-3}$  mmol) was added dropwise. After stirring for 1 h at the same temperature, TLC analysis indicated formation of product, and the reaction vessel was allowed to warm to ambient temperature, and the reaction was quenched by the addition of sat. aq.  $\text{NaHCO}_3$  (10 mL). The layers were separated and the aqueous layer was extracted with  $\text{CH}_2\text{Cl}_2$  (5mL). The combined organic layers were dried ( $\text{Na}_2\text{SO}_4$ ), filtered through cotton and concentrated. Flash column chromatography (75mL silica gel, 12 $\rightarrow$ 20%  $\text{CH}_2\text{Cl}_2$ /hexanes eluent) afforded 1.06 g of **1i** a colorless oil (72%).

**Data for 1i** TLC:  $R_f$  = 0.2 (80:20 hexanes/ $\text{CH}_2\text{Cl}_2$ ); FTIR: (thin film): 2953, 2934, 2875, 2727, 1726, 1461, 1416, 1235, 1004, 723; LRMS (APCI +)  $\text{C}_{28}\text{H}_{65}\text{O}_2\text{Si}^+$   $[\text{M}+\text{H}]^+$   $m/z$  = 545.5 (25%);  $^{13}\text{C}$  NMR (500 MHz,  $\text{CDCl}_3$ ):  $\delta$  = 202.6, 73.3, 49.4, 37.2, 31.7, 29.7, 29.2, 24.9, 22.6, 14.0, 9.8, 8.6, 5.3, 4.7;  $^1\text{H}$  NMR (500 MHz,  $\text{CDCl}_3$ ):  $\delta$  = 9.70 (dd,  $J$ = 3.5, 2.0 Hz, 1H), 3.75 (dddd,  $J$  = 4.5, 6.0, 4.5, 6.0 Hz, 1H), 2.53, (ddd,  $J$ = 15.5, 6.0, 2.0 Hz, 1H), 2.39 (ddd,  $J$  = 15.5, 4.5, 3.5 Hz, 1H), 1.51-1.61 (m, 1H), 1.40-1.48 (m, 1H), 1.2-1.3 (m,

10 H), 1.1-1.18 (m, 1 H), 1.04, (t,  $J = 8\text{Hz}$ , 27H), 0.88 (t,  $J = 7.0\text{Hz}$ , 3H), 0.76 (q,  $J = 8.0\text{Hz}$ , 18H).

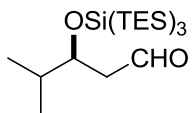

**1j**

Generated according to **GP 2** and used *in situ*

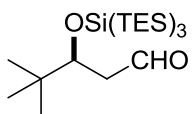

**1k**

Generated according to **GP 2** and used *in situ*

### Synthetic Procedures and Data for enolsilanes **2** and **23**

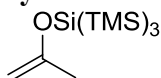

**2a** Previously described compound<sup>26</sup>

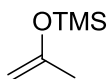

**2b** Obtained from Sigma Aldrich and reused without further purification.

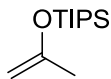

**2c** Previously described compound<sup>27</sup>

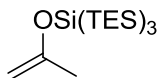

**2d** Previously described compound.<sup>28</sup>

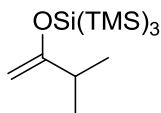

**2e** Previously described compound<sup>9</sup>

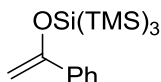

**2f** Previously described compound<sup>9</sup>

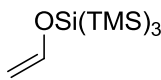

<sup>26</sup> Boxer, M. B.; Akakura, M.; Yamamoto, H. *J. Am. Chem. Soc.* **2008**, *130*, 1580–1582.

<sup>27</sup> Simchen, G.; Jonas, S. *Journal für Praktische Chemie/Chemiker-Zeitung* **1998**, *340*, 506–512.

<sup>28</sup> Yamaoka, Y.; Yamamoto, H. *J. Am. Chem. Soc.* **2010**, *132*, 5354–5356.

**2g** Previously described compound<sup>29</sup>

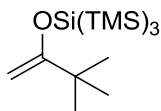

**2h** <sup>13</sup>C NMR (500MHz, CDCl<sub>3</sub>, 295K) δ = 170.39, 82.85, 36.93, 28.34, 0.56; <sup>1</sup>H NMR (500MHz, CDCl<sub>3</sub>, 295K) δ = 3.98 (d, *J*=1.8 Hz, 1 H), 3.79 (d, *J*=1.8 Hz, 1 H), 1.03 (s, 9 H), 0.21 (s, 27 H);

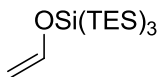

**2i**

### Synthetic procedure for **2i**

A flame-dried 100 mL round-bottomed flask fitted with a rubber septum containing a magnetic stir bar was charged with *tris*(triethylsilyl)silane (5.63 g, 15 mmol). CH<sub>2</sub>Cl<sub>2</sub> (22 mL) was added and the stirring flask was cooled to 0 °C. Triflic acid was added dropwise by syringe over 4 min. Gas evolution was observed. The reaction vessel was allowed to warm to ambient temperature and the reaction was stirred for 1 h. To a dry 25 mL secondary pear-shaped flask fitted with a rubber septum was added acetaldehyde (0.74 g, 17 mmol) under N<sub>2</sub>. The flask was immediately cooled to 0 °C and CH<sub>2</sub>Cl<sub>2</sub> (mL) and Et<sub>3</sub>N (3.2 mL, 23 mmol) were added. The contents of the flask were mixed and transferred by syringe to the reaction flask at 0°C in a dropwise manner. The reaction was stirred for 25 min then quenched by the addition of NaHCO<sub>3</sub> (sat. aq., 25mL) hexanes. The mixture was stirred vigorously then diluted with 50mL hexanes. The organic layer was washed with H<sub>2</sub>O (2 x 25mL), NaHCO<sub>3</sub> (25mL), and brine (25mL), dried over Na<sub>2</sub>SO<sub>4</sub>, filtered through cotton and concentrated. Purification by flash chromatography (200 mL silica gel, hexanes eluent) afforded **20** as a colorless oil (3.64 g, 58%).

**Data for 20:** TLC: R<sub>f</sub> = 0.59 (hexanes); <sup>13</sup>C NMR (500 MHz, CDCl<sub>3</sub>): δ = 150.8, 92.6, 8.7, 5.3 <sup>1</sup>H NMR (500 MHz, CDCl<sub>3</sub>): δ = 6.20 (dd, *J*=13.1, 5.5 Hz, 1 H), 4.23 (dd, *J*=13.4, 0.6 Hz, 1 H), 3.95 (dd, *J*=5.5, 0.6 Hz, 1 H), 1.03 (t, *J*=7.9 Hz, 27 H), 0.79 (q, *J*=7.9 Hz, 18 H); FTIR (thin film): 2953, 2909, 2876, 1622, 1460, 1416, 1310, 1171, 1001, 828, 724. GCMS (EI) C<sub>18</sub>H<sub>43</sub>OSi<sub>4</sub><sup>+</sup> [M – CH<sub>3</sub>CH<sub>2</sub>]<sup>+</sup> m/z = 387.2 (20%)

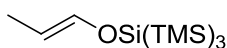

**23-E** Previously described compound<sup>30</sup>

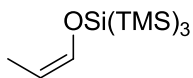

**23-Z** Previously described compound<sup>13</sup>

### Synthetic procedure and data for compounds **3**

<sup>29</sup> Boxer, M. B.; Yamamoto, H. *Org. Lett.* **2005**, *7*, 3127–3129.; Boxer, M. B.; Yamamoto, H. *Nature Protocols* **2006**, *1*, 2434–2438.

<sup>30</sup> Brady, P. B.; Yamamoto, H. *Angew. Chem. Int. Ed.* **2012**, *51*, 1942–1946.

Compounds **3a-3l** (Table 1, entries 1 – 12), were prepared according to **GP3**.

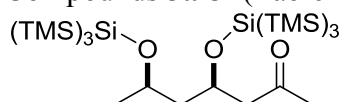

### General procedure 3 (GP3)

A dry 10mL round bottomed flask with magnetic stir bar was charged with aldehyde **1a** (83mg, 0.2 mmol), enolsilane **2a** (73 mg, 0.24 mmol), then fitted with a septum and purged with N<sub>2</sub>. CH<sub>2</sub>Cl<sub>2</sub> (2.0 mL) was added, and the vessel was cooled to -45 °C in a dry ice/acetonitrile bath. HNTf<sub>2</sub> (20μL, 0.010 M CH<sub>2</sub>Cl<sub>2</sub>,) was added dropwise. After stirring for 1 h at the same temperature, TLC analysis indicated formation of product and consumption of starting materials, and the reaction vessel was allowed to warm to ambient temperature, then was quenched by the addition of sat. aq. NaHCO<sub>3</sub> (10 mL). The mixture was poured over 20 mL hexanes. The layers were then separated, and the organic layer was washed with H<sub>2</sub>O, dried (Na<sub>2</sub>SO<sub>4</sub>), filtered through cotton and concentrated. Flash column chromatography (16mL silica gel, 12→35% CH<sub>2</sub>Cl<sub>2</sub>/hexanes eluent) afforded **3a** (76%). **Data for 3a:** TLC: R<sub>f</sub> = 0.60 (10:90 EtOAc/Hexanes); <sup>13</sup>C NMR (500MHz, CDCl<sub>3</sub>, 295K) δ = 207.86, 70.76, 69.53, 50.05, 46.28, 31.12, 23.96, 0.7; <sup>1</sup>H NMR (500MHz, CDCl<sub>3</sub>, 295K) δ = 3.95 - 4.06 (m, 1 H), 3.66 (dqdd, J=8.2, 6.1, 6.1, 6.1, 4.0, 1.8 Hz, 1 H), 2.63 (dd, J=14.3, 4.9 Hz, 1 H), 2.45 (dd, J=14.3, 6.4 Hz, 1 H), 2.14 (s, 3 H), 1.71 (ddd, J=13.6, 8.4, 5.5 Hz, 1 H), 1.34 (ddd, J=13.4, 8.9, 4.3 Hz, 1 H), 1.13 (d, J=6.1 Hz, 3 H), 0.18 (s, 27 H), 0.18 (s, 27 H); LRMS (API-ES): C<sub>16</sub>H<sub>39</sub>O<sub>2</sub>Si<sub>4</sub><sup>+</sup> [M - TMS<sub>3</sub>SiO]<sup>+</sup> m/z = 375.2 (100%); FTIR (thin film): 2949, 2893, 1719, 1244, 1035, 835, 687, 623; white solid

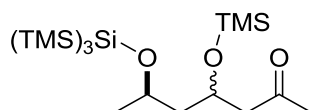

### 3b

**Data for 3b** TLC: R<sub>f</sub> = 0.22 (10:90 EtOAc/Hexanes); <sup>13</sup>C NMR (500MHz, CDCl<sub>3</sub>, 295K, mixture of diastereomers) δ = 207.71, 207.67, 70.13, 69.78, 67.58, 66.49, 51.80, 51.74, 48.41, 47.58, 31.77, 31.68, 24.01, 23.20, 0.61, 0.48; <sup>1</sup>H NMR (500MHz, CDCl<sub>3</sub>, 295K, 1:1 mixture of diastereomers) δ = 4.22 (quin, J=6.1 Hz, 1 H), 4.16 - 4.21 (m, 1 H), 3.60 (sxt, J=6.1 Hz, 1 H), 3.51 (sxt, J=6.1 Hz, 1 H), 2.60 (dd, J=15.0, 8.2 Hz, 2 H), 2.57 (d, J=5.8 Hz, 2 H), 2.44 (dd, J=15.0, 4.3 Hz, 1 H), 2.15 (s, 3 H), 2.14 (s, 3 H), 1.64 (s, 3 H), 1.54 (s, 0 H), 1.14 (s, 2 H), 1.12 (d, J=4.3 Hz, 3 H), 0.18 (s, 27 H), 0.09 (s, 8 H), 0.08 (s, 9 H)

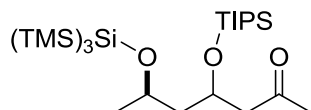

### 3c

**Data for 3c:** TLC: R<sub>f</sub> = 0.33 (10:90 EtOAc/Hexanes); <sup>13</sup>C NMR (500MHz, CDCl<sub>3</sub>, 295K, mixture of diastereomers) δ = 208.05, 207.60, 70.43, 69.55, 67.71, 67.08, 51.72, 50.72, 48.33, 46.99, 32.05, 31.74, 23.91, 23.67, 18.33, 18.31, 12.81, 12.75, 0.62; <sup>1</sup>H NMR (500MHz, CDCl<sub>3</sub>, 295K, mixture of diastereomers) δ = 4.39 - 4.52 (m, 1 H), 4.29

(ddt,  $J=8.9, 7.2, 4.4, 4.4$  Hz, 1 H), 3.61 - 3.73 (m, 1 H), 3.46 (dq,  $J=7.5, 5.9, 5.9, 5.9$  Hz, 1 H), 2.74 (dd,  $J=14.8, 4.7$  Hz, 1 H), 2.57 - 2.63 (m, 1 H), 2.49 - 2.55 (m, 2 H), 2.17 (s, 3 H), 2.15 - 2.16 (m, 3 H), 1.60 - 1.77 (m, 4 H), 1.53 (ddd,  $J=13.1, 9.1, 4.4$  Hz, 1 H), 1.13 (d,  $J=6.1$  Hz, 3 H), 1.12 (d,  $J=6.4$  Hz, 3 H), 1.02 - 1.06 (m, 52 H), 0.18 (s, 54 H); LRMS (API-ES +):  $C_{25}H_{61}O_3Si_5^+$   $[M+H]^+$   $m/z = 549.3$  (100%); LRMS (API-ES -):  $C_{22}H_{51}O_3Si_4^-$   $[M - TMS]^-$   $m/z = 475.2$  (35%). FTIR (thin film): 2949, 2894, 1715, 1372, 1245, 1093, 835, 687; colorless oil.

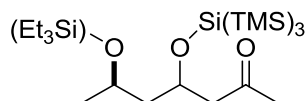

### 3d

**Data for 3d:** TLC:  $R_f = 0.69$  (10:90 EtOAc/Hexanes);  $^{13}C$  NMR (500MHz,  $CDCl_3$ , 295K, mixture of diastereomers)  $\delta = 207.79, 207.45, 71.74, 70.95, 66.53, 65.55, 51.32, 50.16, 47.43, 46.58, 31.89, 31.73, 24.58, 24.40, 7.06, 5.24, 0.64$ .  $^1H$  NMR (500MHz,  $CDCl_3$ , 295K, mixture of diastereomers)  $\delta = 3.96 - 4.02$  (m, 1 H), 3.90 - 3.95 (m, 1 H), 3.85 - 3.90 (m, 1 H), 3.78 - 3.84 (m, 1 H), 2.55 - 2.71 (m, 2 H), 2.42 - 2.54 (m, 3 H), 2.13 (s, 3 H), 2.13 (s, 2 H), 1.51 - 1.77 (m, 2 H), 1.34 - 1.45 (m, 1 H), 1.14 (d,  $J=6.1$  Hz, 6 H), 0.93 (t,  $J=8.2$  Hz, 18 H), 0.67 - 0.68 (m, 12 H), 0.57 (q,  $J=7.7$  Hz, 15 H), 0.16 - 0.22 (m, 54 H); LRMS (API-ES +)  $C_{16}H_{39}O_2Si_4^+$   $[M - TESO]^+$   $m/z = 375.2$  (100%); FTIR (thin film): 2953, 2878, 1718, 1373, 1245, 1058, 837, 745; colorless oil.

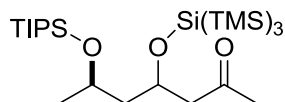

### 3e

**Data for 3e:** TLC:  $R_f = 0.66$  (10:90 EtOAc/Hexanes);  $^{13}C$  NMR (500MHz,  $CDCl_3$ , 295K, mixture of diastereomers)  $\delta = 207.46, 71.42, 70.69, 66.52, 65.95, 70.78, 50.81, 50.78, 47.77, 47.06, 31.86, 31.70, 24.18, 24.07, 138.39, 18.35, 18.30, 18.28, 12.7, 12.63, 0.66$ ;  $^1H$  NMR (500MHz,  $CDCl_3$ , 295K, mixture of diastereomers)  $\delta = 4.05 - 4.19$  (m, 1 H), 3.96 - 4.04 (m, 1 H), 3.82 - 3.93 (m, 1 H), 2.65 (dd,  $J=15.3, 6.1$  Hz, 1 H), 2.52 - 2.59 (m, 1 H), 2.45 - 2.51 (m, 1 H), 2.13 (s, 3 H), 1.62 - 1.82 (m, 3 H), 1.44 (dt,  $J=13.4, 6.4$  Hz, 1 H), 1.20 (d,  $J=6.1$  Hz, 3 H), 1.17 (d,  $J=6.1$  Hz, 2 H), 1.02 - 1.08 (m, 21 H), 0.15 - 0.22 (m, 27 H); LRMS (API-ES +)  $C_{16}H_{39}O_2Si_4^+$   $[M - TIPS]_2^+$   $m/z = 375.2$  (100%),  $C_{25}H_{61}O_3Si_5^+$   $[M+H]^+$   $m/z = 549.2$  (92%). FTIR (thin film): 2946, 2867, 1720, 1464, 1376, 1245, 1104, 1015, 882, 836, 684; colorless oil.

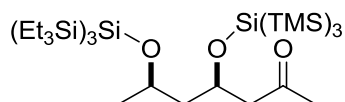

### 3f

**Data for 3f:** TLC:  $R_f = 0.22$  (25:75  $CH_2Cl_2$ /hexanes);  $^{13}C$  NMR (500MHz,  $CDCl_3$ , 295K,)  $\delta = 207.11, 70.35, 70.10, 51.36, 46.18, 31.58, 22.87, 9.04, 5.57, 0.66$ ;  $^1H$  NMR (500MHz,  $CDCl_3$ , 295K,)  $\delta = 3.89 - 4.00$  (m, 1 H), 3.58 - 3.70 (m, 1 H), 2.53 - 2.67 (m, 2 H), 2.12 (s, 2 H), 1.65 - 1.77 (m, 1 H), 1.37 (dt,  $J=13.4, 6.6$  Hz, 1 H), 1.10 (d,  $J=6.1$  Hz, 3 H), 0.99 - 1.07 (m, 27 H), 0.71 - 0.82 (m, 18 H), 0.14 - 0.23 (m, 27 H); LRMS (API-ES +)  $C_{16}H_{39}O_2Si_4^+$   $[M - TES_3SiO]^+$   $m/z = 375.2$  (100%); LRMS (API-ES -)  $C_{31}H_{75}O_3Si_7^-$



[M – TMS]<sup>−</sup> m/z = 691.3, (40%); FTIR (thin film): 2953, 2876, 1719, 1458, 1418, 1376, 1245, 1091, 1005, 838, 724; colorless oil

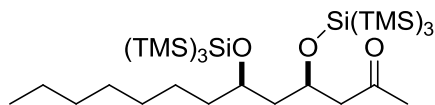

### 3g

**Data for 3g:** TLC: R<sub>f</sub> = 0.11 (CH<sub>2</sub>Cl<sub>2</sub>:hexanes 25:75); <sup>1</sup>H NMR (500 MHz, CDCl<sub>3</sub>): 4.01 (dq, *J*=8.1, 5.8 Hz, 1 H), 3.47 (tt, *J*=8.2, 4.3 Hz, 1 H), 2.59 (dd, *J*=14.2, 5.3 Hz, 1 H), 2.48 (dd, *J*=18.3, 6.1 Hz, 1 H), 2.14 (s, 3 H), 1.63 (ddd, *J*=13.4, 7.6, 4.9 Hz, 1 H), 1.37 - 1.46 (m, 2 H), 1.28 (br. s., 10 H), 0.88 (t, *J*=6.9 Hz, 3 H), 0.19 (s, 27 H), 0.18 (s, 27 H); <sup>13</sup>C NMR (500 MHz, CDCl<sub>3</sub>): δ = 207.8, 73.6, 70.8, 50.0, 43.5, 37.8, 32.1, 31.9, 30.1, 29.5, 25.3, 22.8, 14.3, 0.8, 0.7; FTIR (thin film): 2955, 2896, 2857, 1720, 1373, 1245, 1052, 836, 755, 688, 624.

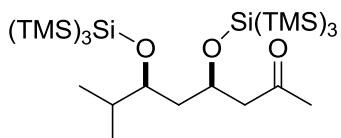

### 3h

**Data for 3h:** TLC: R<sub>f</sub> = 0.30 (CH<sub>2</sub>Cl<sub>2</sub>:hexanes 25:75); <sup>1</sup>H NMR (500 MHz, CDCl<sub>3</sub>): δ = 3.97 (quin, *J*=6.3 Hz, 1 H), 3.45 (ddd, *J*=8.4, 5.0, 3.1 Hz, 1 H), 2.55 - 2.65 (m, 2 H), 2.46 - 2.54 (m, 1 H), 2.15 (s, 3 H), 1.73 - 1.87 (m, 1 H), 1.54 - 1.69 (m, 1 H), 1.26 (ddd, *J*=13.1, 7.8, 5.0 Hz, 1 H), 0.87 (d, *J*=6.7 Hz, 3 H), 0.84 (d, *J*=7.0 Hz, 3 H), 0.82 (d, *J*=6.7 Hz, 3 H), 0.18 (s, 54 H); <sup>13</sup>C NMR (500 MHz, CDCl<sub>3</sub>): δ = 207.57, 77.28, 70.86, 50.12, 38.62, 32.17, 17.73, 17.51, 17.36, 0.97, 0.70; LRMS (API-ES +) C<sub>27</sub>H<sub>71</sub>O<sub>3</sub>Si<sub>8</sub><sup>+</sup> [M+H]<sup>+</sup> m/z = 667.2 (100%); FTIR (thin film): 2958, 2895, 1720, 1386, 1246, 1032, 831, 755, 687.4, 624; colorless oil.

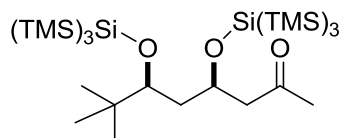

### 3i

**Data for 3i:** TLC: R<sub>f</sub> = 0.30 (CH<sub>2</sub>Cl<sub>2</sub>:hexanes 25:75); <sup>13</sup>C NMR (500 MHz, CDCl<sub>3</sub>): δ = 206.82, 79.86, 70.44, 52.28, 42.74, 36.65, 31.48, 27.2, 26.27, 1.16, 0.88; <sup>1</sup>H NMR (500 MHz, CDCl<sub>3</sub>): δ = 4.16 (sxt, *J*=5.5 Hz, 1 H), 3.36 (dd, *J*=8.4, 3.8 Hz, 1 H), 2.73 (dd, *J*=16.5, 4.6 Hz, 1 H), 2.54 (dd, *J*=16.3, 8.1 Hz, 1 H), 2.13 (s, 3 H), 1.60 - 1.70 (m, 1 H), 1.53 - 1.60 (m, 1 H), 0.90 (s, 9 H), 0.18 - 0.20 (m, 54 H); <sup>1</sup>H NMR (500 MHz, CDCl<sub>3</sub>): δ = LRMS (API-ES +) C<sub>19</sub>H<sub>45</sub>O<sub>2</sub>Si<sub>4</sub><sup>+</sup> [M – TMS<sub>3</sub>SiO]<sup>+</sup> m/z = 417.1 (100%); LRMS (APCI -) C<sub>25</sub>H<sub>63</sub>O<sub>3</sub>Si<sub>7</sub><sup>−</sup> [M – TMS]<sup>−</sup> m/z = 607.2 (100%). FTIR (thin film): 2950, 2894, 1720, 1394, 1244, 1090, 1021, 835, 687; white solid.

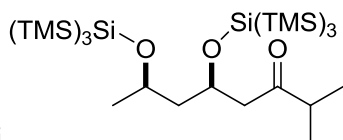

**3j**

**Data for 3j:**  $^{13}\text{C}$  NMR (500 MHz,  $\text{CDCl}_3$ ):  $\delta$  = 213.01, 70.61, 69.75, 47.01, 46.25, 42.15, 23.66, 18.26, 17.75, 0.70;  $^1\text{H}$  NMR (500 MHz,  $\text{CDCl}_3$ ):  $\delta$  = 4.01 (quin,  $J$ =5.5 Hz, 1 H), 3.68 (sxt,  $J$ =5.8 Hz, 1 H), 2.66 (dd,  $J$ =15.3, 5.5 Hz, 1 H), 2.55 - 2.63 (m, 1 H), 2.49 (dd,  $J$ =16.0, 6.6 Hz, 1 H), 1.65 - 1.74 (m, 1 H), 1.29 - 1.38 (m, 1 H), 1.13 (d,  $J$ =5.8 Hz, 3 H), 1.07 (d,  $J$ =7.0 Hz, 3 H), 1.05 (d,  $J$ =7.0 Hz, 3 H), 0.18 - 0.20 (m, 27 H), 0.17 (d,  $J$ =1.8 Hz, 27 H); LRMS (API-ES +)  $\text{C}_{27}\text{H}_{71}\text{O}_3\text{Si}_8^+$   $[\text{M}+\text{H}]^+$   $m/z$  = 667.3 (100%); FTIR (thin film): 2949, 2894, 1717, 1257, 1244, 1049, 835, 687, 624; waxy solid

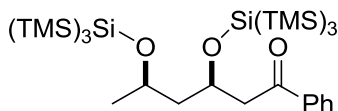

**3k**

**Data for 3k:**  $^{13}\text{C}$  NMR (500 MHz,  $\text{CDCl}_3$ )  $\delta$  = 199.07, 138.14, 132.88, 128.55, 128.51, 71.22, 69.82, 46.69, 45.34, 23.63, 0.68;  $^{13}\text{C}$  NMR (500 MHz,  $\text{CDCl}_3$ )  $\delta$  = 7.94 (d,  $J$ =7.9 Hz, 2 H), 7.50 - 7.56 (m, 1 H), 7.41 - 7.49 (m, 2 H), 4.20 (sxt,  $J$ =5.5 Hz, 1 H), 3.75 (sxt,  $J$ =6.0 Hz, 1 H), 3.11 (dd,  $J$ =15.3, 5.5 Hz, 1 H), 3.04 (dd,  $J$ =15.3, 6.4 Hz, 1 H), 1.79 (dt,  $J$ =13.4, 6.6 Hz, 1 H), 1.44 - 1.54 (m, 1 H), 1.18 (d,  $J$ =6.1 Hz, 3 H), 0.17 (s, 27 H), 0.14 (s, 27 H); LRMS (API-ES +)  $\text{C}_{30}\text{H}_{69}\text{O}_3\text{Si}_8^+$   $[\text{M}+\text{H}]^+$   $m/z$  = 701.3 (100%); FTIR (thin film): 2949, 2894, 1687, 1244, 1055, 835, 623; white solid.

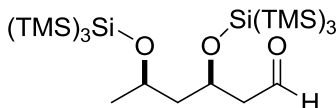

**3l**

**Data for 3l:**  $^{13}\text{C}$  NMR (500 MHz,  $\text{CDCl}_3$ , 295K)  $\delta$  = 202.6, 70.01, 69.36, 49.72, 46.58, 24.05, 0.72, 0.62;  $^1\text{H}$  NMR (500 MHz,  $\text{CDCl}_3$ , 295K)  $\delta$  = 9.77 (dq,  $J$ =2.1, 0.6 Hz, 1 H), 4.10 (sxt,  $J$ =5.2 Hz, 2 H), 3.57 - 3.68 (m, 2 H), 2.60 (dd,  $J$ =15.0, 4.0 Hz, 1 H), 2.38 (ddd,  $J$ =15.3, 6.7, 3.7 Hz, 1 H), 1.82 (ddd,  $J$ =13.7, 8.8, 5.0 Hz, 1 H), 1.42 (ddd,  $J$ =12.8, 8.9, 3.7 Hz, 2 H), 1.15 (d,  $J$ =6.1 Hz, 3 H), 0.18 (d,  $J$ =1.5 Hz, 54 H); LRMS (API-ES -)  $\text{C}_{21}\text{H}_{55}\text{O}_3\text{Si}_7$   $[\text{M}-\text{TMS}]^+$   $m/z$  = 551.2 (40%); LRMS (APCI +)  $\text{C}_9\text{H}_{27}\text{OSi}_4^+$   $[\text{TMS}_3\text{SiO}]^+$   $m/z$  = 263.0 (100%); waxy semi-solid.

### Stereochemical assignment for compounds 3

Compounds 3 were assigned 1,3 *syn* based on prior studies.<sup>31</sup>

### Synthetic procedures and data for compounds 5

Compounds 5 (Table 3) were prepared according to GP4

<sup>31</sup> Boxer, M. B.; Yamamoto, H. *J. Am. Chem. Soc.* **2006**, *128*, 48–49.

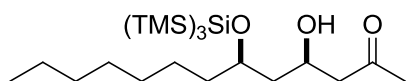

**5a**

**General Procedure 4:** To a dry 1 dram vial containing a magnetic stir bar and fitted with a septum was added CH<sub>2</sub>Cl<sub>2</sub> (0.5 mL) and acetone (30 μL, 0.41 mmol) under an N<sub>2</sub> atmosphere. The solution was stirred, and cooled to -78 °C. Chlorodicyclohexylborane (0.4 mL, 1.0 M hexanes) and triethylamine (60 μL, 0.43 mmol) were sequentially added dropwise, resulting in the immediate formation of a white precipitate (Et<sub>3</sub>NHCl). The vial was stirred for 5 min at this temperature then warmed to 0 °C. A separate 10 mL round-bottomed flask containing a magnetic stir bar and fitted with a septum was charged with **1e** (105 mg, 0.21 mmol). CH<sub>2</sub>Cl<sub>2</sub> (1.8 mL) was added and the flask was cooled to -78 °C. The enolborinate solution was added dropwise to the reaction flask (0.2 mL CH<sub>2</sub>Cl<sub>2</sub> rinse), leaving some of the white precipitate behind. The reaction was stirred 30 min, and TLC analysis indicated >90% conversion of the starting material. The reaction was quenched by the addition of MeOH (1 mL) and pH 7.0 Buffer (0.2 M, 4 mL). The mixture was allowed to warm to ambient temperature and stirred vigorously. H<sub>2</sub>O<sub>2</sub> was then added (30% aq., 0.1 mL), and the reaction was stirred for 30 min. The mixture was poured onto H<sub>2</sub>O, the layers separated, and the aqueous layer extracted with CH<sub>2</sub>Cl<sub>2</sub> (5 mL) and hexanes (5 mL) the combined organic layers were dried (Na<sub>2</sub>SO<sub>4</sub>), filtered through cotton and concentrated. Flash column chromatography (16 mL silica gel, 5→20% Et<sub>2</sub>O/hexanes eluent) afforded 102 mg of **5a** a colorless oil (72%).

Data for **5a**: TLC: R<sub>f</sub> = 0.11 (5:95 EtOAc/hexanes); <sup>1</sup>H NMR (500 MHz, CDCl<sub>3</sub>): δ = 4.12 - 4.21 (m, 1 H), 3.66 (d, J=1.8 Hz, 1 H), 3.61 (spt, J=4.1 Hz, 1 H), 2.57 (dd, J=9.2, 7.8 Hz, 1 H), 2.16 (s, 3 H), 1.55 - 1.64 (m, 2 H), 1.43 - 1.54 (m, 2 H), 1.26 (br. s., 10 H), 0.87 (t, J=6.9 Hz, 3 H), 0.20 (s, 27 H); <sup>13</sup>C NMR (500 MHz, CDCl<sub>3</sub>): δ = 208.9, 76.9, 66.9, 51.1, 42.3, 37.6, 31.9, 30.0, 29.5, 22.8, 14.2, 0.7; FTIR (thin film): 3479 (br, OH), 2948, 2857, 1714 (C=O), 1245, 1074, 837; LRMS (APCI+) C<sub>22</sub>H<sub>53</sub>O<sub>3</sub>Si<sub>4</sub><sup>+</sup> [M + H]<sup>+</sup> 477.2 (100%).

**5c** (See 6c)

**5d** (See 6d)

**5f** (See 6f)

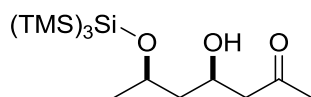

**5i**

**Data for 5i:** TLC: R<sub>f</sub> = 0.37 (10:90 EtOAc/hexanes); <sup>13</sup>C NMR (500 MHz, CDCl<sub>3</sub>, 293K) δ = 208.65, 72.72, 68.86, 50.86, 45.43, 30.86, 23.78, 0.56; <sup>1</sup>H NMR (500 MHz, CDCl<sub>3</sub>, 293K) δ = 4.09 - 4.20 (m, 1 H), 3.72 - 3.81 (m, 1 H), 3.64 (s, 1 H), 2.57 (dd, J=16.8, 7.3 Hz, 1 H), 2.50 (dd, J=16.8, 5.2 Hz, 1 H), 2.13 (s, 3 H), 1.50 (d, J=6.4 Hz, 1 H), 1.12 (d, J=6.1 Hz, 3 H), 0.15 - 0.19 (m, 27 H); LRMS (API-ES +): C<sub>16</sub>H<sub>41</sub>O<sub>3</sub>Si<sub>4</sub><sup>+</sup> [M + H]<sup>+</sup> m/z = 393.2 (100%); FTIR (thin film): 3482 (br), 2947, 2868, 1721, 1464, 1773, 1245, 1103, 836, 684.

colorless oil

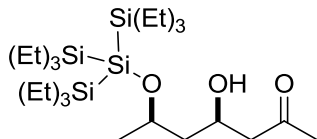

**5l**

**Data for 5l:** TLC:  $R_f = 0$ . (EtOAc/hexanes);  $^{13}\text{C}$  NMR (500 MHz,  $\text{CDCl}_3$ , 293K)  $\delta = 209.50, 71.57, 65.75, 50.94, 45.60, 30.75, 32.25, 8.94, 5.48$ ;  $^1\text{H}$  NMR (500 MHz,  $\text{CDCl}_3$ , 293K)  $\delta = 4.05 - 4.21$  (m, 1 H), 3.71 (sxt,  $J=6.1$  Hz, 1 H), 3.23 (d,  $J=2.7$  Hz, 1 H), 2.50 - 2.61 (m, 2 H), 2.14 (s, 3 H), 1.62 (ddd,  $J=14.3, 9.5, 6.7$  Hz, 1 H), 1.39 (ddd,  $J=13.7, 6.1, 3.4$  Hz, 1 H), 1.12 (d,  $J=6.1$  Hz, 3 H), 1.03 (t,  $J=7.9$  Hz, 27 H), 0.76 (q,  $J=7.7$  Hz, 18 H); LRMS (API-ES):  $\text{C}_{25}\text{H}_{59}\text{O}_3\text{Si}_4^+$   $[\text{M} + \text{H}]^+$   $m/z = 519.3$  (100%); FTIR (Thin film): 3483, 2951, 2875, 2729, 1713, 1458, 1417, 1376, 1095, 1004, 723, 579; colorless oil

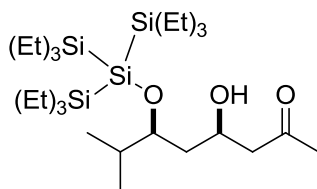

**5n**

**Data for 5n:** TLC:  $R_f = 0.20$  (10:90 Et<sub>2</sub>O/hexanes);  $^{13}\text{C}$  NMR (500 MHz,  $\text{CDCl}_3$ , 293K)  $\delta = 209.11, 79.41, 66.18, 50.96, 38.27, 32.01, 30.77, 17.50, 17.16, 9.03, 5.60$ ;  $^1\text{H}$  NMR (500 MHz,  $\text{CDCl}_3$ , 293K)  $\delta = 4.06 - 4.16$  (m, 1 H), 3.46 (ddd,  $J=7.7, 5.9, 2.9$  Hz, 1 H), 3.26 (br. s., 1 H), 2.51 - 2.58 (m, 2 H), 2.15 (s, 3 H), 1.46 - 1.56 (m, 1 H), 1.36 - 1.43 (m, 1 H), 1.03 (t,  $J=7.9$  Hz, 27 H), 0.85 (d,  $J=6.7$  Hz, 3 H), 0.74 - 0.81 (m, 18 H); LRMS (API-ES):  $\text{C}_{27}\text{H}_{61}\text{O}_2\text{Si}_4^+$   $[\text{M} - \text{OH}]^+$   $m/z = 529.4$  (100%); FTIR (thin film): 3495, 2953, 2728, 1716, 1877, 1458, 1418, 1367, 1005, 722; colorless oil

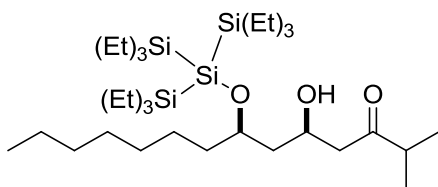

**5o**

**Data for 5o:** TLC:  $R_f = 0.13$  (10:90 EtOAc/hexanes);  $^{13}\text{C}$  NMR (500 MHz,  $\text{CDCl}_3$ , 293K)  $\delta = 215.68, 75.52, 65.65, 47.69, 41.82, 41.47, 36.34, 31.93, 30.06, 29.46, 24.80, 22.78, 18.14, 18.10, 8.98, 5.53$ ;  $^1\text{H}$  NMR (500 MHz,  $\text{CDCl}_3$ , 293K)  $\delta = 4.07 - 4.17$  (m, 1 H), 3.51 - 3.60 (m, 1 H), 3.35 (d,  $J=2.7$  Hz, 1 H), 2.64 (dd,  $J=17.4, 4.0$  Hz, 1 H), 2.58 (s, 2 H), 1.48 - 1.63 (m, 3 H), 1.36 - 1.46 (m, 1 H), 1.19 - 1.33 (m, 10H), 1.09 (d,  $J=7.0$  Hz, 3 H), 1.09 (d,  $J=7.0$  Hz, 3 H), 1.03 (t,  $J=7.8$  Hz, 27 H), 0.85 - 0.91 (m, 0 H), 0.77 (q,  $J=7.6$  Hz, 18 H); LRMS (API-ES):  $\text{C}_{32}\text{H}_{72}\text{O}_3\text{Si}_4^+$   $[\text{M} + \text{H}]^+$   $m/z = 631.5$  (100%); FTIR (thin film): 3509 (br), 2952, 2874, 1704, 1463, 1416, 1378, 1236, 1005, 723; colorless oil

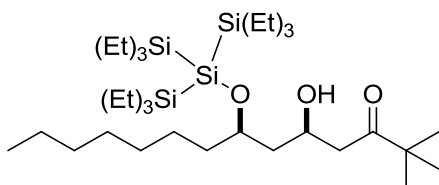

### 5p

**Data for 5p:** TLC:  $R_f = 0.19$  (10:90 EtOAc/hexanes);  $^{13}\text{C}$  NMR (500 MHz,  $\text{CDCl}_3$ , 293K)  $\delta = 217.20, 75.44, 65.67, 44.00, 41.86, 36.27, 31.95, 30.08, 29.47, 26.38, 24.71, 22.79, 14.22, 8.99, 5.53$ ;  $^1\text{H}$  NMR (500 MHz,  $\text{CDCl}_3$ , 293K)  $\delta = 4.09$  (spt,  $J=4.1$  Hz, 1 H), 3.49 - 3.60 (m, 1 H), 3.40 (d,  $J=2.7$  Hz, 1 H), 2.65 (dd,  $J=17.7, 4.3$  Hz, 1 H), 2.58 (dd,  $J=17.7, 7.3$  Hz, 1 H), 1.48 - 1.61 (m, 3 H), 1.38 - 1.47 (m, 1 H), 1.26 (br. s., 10 H), 1.12 (s, 9 H), 1.03 (t,  $J=7.9$  Hz, 27 H), 0.87 (t,  $J=6.7$  Hz, 3 H), 0.76 (q,  $J=7.6$  Hz, 18 H); LRMS (API-ES):  $\text{C}_{34}\text{H}_{77}\text{O}_3\text{Si}_4^+$   $[\text{M}+\text{H}]^+$   $m/z = 645.5$  (100%); FTIR (thin film): 3524 (br), 2952, 1696, 1458, 1418, 1394, 1236, 1063, 1004, 722; colorless oil

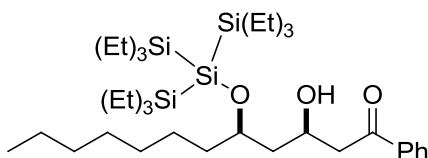

### 5q

**Data for 5q:** TLC:  $R_f = 0.13$  (25:75  $\text{CH}_2\text{Cl}_2$ /hexanes);  $^{13}\text{C}$  NMR (500 MHz,  $\text{CDCl}_3$ , 293K)  $\delta = 200.53, 137.04, 133.46, 128.72, 128.18, 75.58, 65.85, 46.02, 41.93, 36.44, 31.92, 30.07, 29.47, 24.77, 22.78, 14.21, 8.99, 5.54$ ;  $^1\text{H}$  NMR (500 MHz,  $\text{CDCl}_3$ , 293K)  $\delta = 7.95$  (dd,  $J=8.4, 1.4$  Hz, 2 H), 7.57 (tt,  $J=7.6, 1.2$  Hz, 1 H), 7.46 (t,  $J=7.9$  Hz, 2 H), 4.28 - 4.37 (m, 1 H), 3.56 - 3.66 (m, 1 H), 3.48 (d,  $J=2.7$  Hz, 1 H), 3.16 (dd,  $J=17.4, 4.0$  Hz, 1 H), 3.09 (dd,  $J=17.4, 7.6$  Hz, 1 H), 1.63 - 1.73 (m, 2 H), 1.51 - 1.61 (m, 1 H), 1.40 - 1.50 (m, 1 H), 1.27 (br. s., 9 H), 1.16 (d,  $J=6.4$  Hz, 1 H), 1.00 - 1.08 (m, 27 H), 0.88 (t,  $J=7.0$  Hz, 3 H), 0.78 (q,  $J=8.0$  Hz, 18 H); LRMS (API-ES):  $\text{C}_{36}\text{H}_{73}\text{O}_3\text{Si}_4^+$   $[\text{M}+\text{H}]^+$   $m/z = 665.5$  (100%); FTIR (thin film): 3545 (br), 2952, 2874, 1679, 1623, 1598, 1581, 1460, 1415, 1376, 1209, 1004, 732; colorless oil

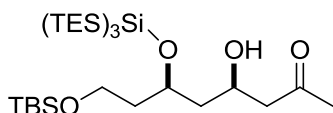

### 5r

$R_f = 0.28$  (1:4  $\text{Et}_2\text{O}$ /hexanes); IR (neat): 3487 (br, OH), 2952, 2875, 1712 (C=O), 1462, 1416, 1255, 1091, 1005, 836  $\text{cm}^{-1}$ ;  $^1\text{H}$  NMR (500 MHz,  $\text{CDCl}_3$ , 293K)  $\delta$  4.23–4.17 (m, 1H), 3.72–3.58 (m, 3H), 3.29 (d, 1H,  $J = 2.5$  Hz), 2.58 (dd,  $J = 17.1, 3.5$  Hz), 2.51 (dd, 1H,  $J = 17.1, 8.3$  Hz), 2.15 (s, 3H), 1.88–1.80 (m, 1H), 1.60–1.48 (m, 3H), 1.03 (t, 27H,  $J = 7.8$  Hz), 0.87 (s, 9H), 0.77 (q, 18H, 7.8 Hz), 0.02 (s, 6H);  $^{13}\text{C}$  NMR (126 MHz,  $\text{CDCl}_3$ , 293K)  $\delta$  209.3, 72.9, 65.1, 59.7, 51.0, 41.9, 38.3, 30.6, 25.9, 18.3, 8.9, 5.4, -5.46, -5.54; LRMS (API-ES+)  $\text{C}_{32}\text{H}_{74}\text{NaO}_4\text{Si}_5$   $[\text{M} + \text{Na}]^+$  685.4 (100%).

### Stereochemical assignments for compounds 5

Compound **5a** was determined to be 1,3-*syn* by comparison to its corresponding 1,3-*anti* diastereomer **6a**, which was determined to be 1,3-*anti* by conversion to acetonide and evaluation of  $^{13}\text{C}$  NMR resonances.

### Synthetic Procedures and Data for compounds **6** (Table 3)

Compounds **6a-6j** (Table 2) were prepared according to **GP 5**.

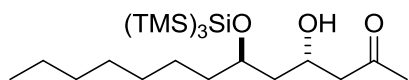

#### **6a**

**General Procedure 5** A dry 10mL round bottomed flask with magnetic stir bar was charged with aldehyde **1e** (118mg, 0.387 mmol), and enolsilane **2a** (105 mg), then fitted with a septum and purged with  $\text{N}_2$ .  $\text{CH}_2\text{Cl}_2$  (2.5 mL) was added, and the vessel was cooled to  $-78^\circ\text{C}$ .  $\text{BF}_3\cdot\text{OEt}_2$  (1.0 M  $\text{CH}_2\text{Cl}_2$ ) was added dropwise. After stirring for 20 min at the same temperature, TLC analysis indicated formation of product and consumption of starting materials and formation of product. The reaction was quenched by addition sat. aq.  $\text{NaHCO}_3$  (10 mL). The mixture was stirred vigorously, and warmed to  $0^\circ\text{C}$ . The layers were then separated, and the aqueous layer was extracted with  $\text{CH}_2\text{Cl}_2$  (2x 3 mL) and hexanes (3mL). The combined organic layers were dried ( $\text{Na}_2\text{SO}_4$ ), filtered through cotton and concentrated. Flash column chromatography (12mL silica gel, 2 $\rightarrow$ 10% v/v EtOAc/hexanes eluent) afforded **6a** a colorless oil (90mg, 75%).

**Data for 6a:**  $R_f$  = 0.26 (1:4 Et<sub>2</sub>O/hexanes); IR (neat): 3479 (br, OH), 2948, 2857, 1714 (C=O), 1245, 1074, 837  $\text{cm}^{-1}$ ;  $^1\text{H}$  NMR (500 MHz,  $\text{CDCl}_3$ , 293K)  $\delta$  4.38–4.32 (m, 1H), 3.84 (br s, 1H), 3.68–3.62 (m, 1H), 2.63 (dd, 1H,  $J$  = 16.5, 7.5 Hz), 2.47 (dd, 1H,  $J$  = 16.5, 5.0 Hz), 2.17 (s, 3H), 1.66–1.48 (m, 4H), 1.31–1.11 (m, 10H), 0.88 (t, 3H,  $J$  = 6.8 Hz), 0.20 (s, 27H);  $^{13}\text{C}$  NMR (126 MHz,  $\text{CDCl}_3$ , 293K)  $\delta$  208.4, 76.4, 64.7, 51.2, 40.1, 35.9, 31.8, 30.9, 29.8, 29.3, 25.6, 22.6, 14.1, 0.5; LRMS (APCI+)  $\text{C}_{22}\text{H}_{53}\text{O}_3\text{Si}_4$  [ $\text{M} + \text{H}$ ]<sup>+</sup> 477.2 (100%),  $\text{C}_{22}\text{H}_{51}\text{O}_2\text{Si}_4$  [ $\text{M} - \text{OH}$ ]<sup>+</sup> 459.2 (38%); colorless oil.

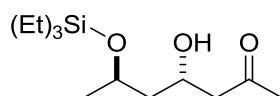

#### **6c**

**Data for 6c:** TLC:  $R_f$  = 0.14 (10:90 EtOAc/hexanes);  $^{13}\text{C}$  NMR (500 MHz,  $\text{CDCl}_3$ , 293K)  $\delta$  = 209.27, 66.46, 64.74, 50.93, 44.68, 30.92, 23.63, 6.94, 4.94;  $^1\text{H}$  NMR (500 MHz,  $\text{CDCl}_3$ , 293K)  $\delta$  = 4.30 - 4.40 (m, 1 H), 4.13 - 4.20 (m, 1 H), 3.64 (d,  $J$  = 2.1 Hz, 1 H), 2.59 (dd,  $J$  = 16.8, 8.2 Hz, 1 H), 2.52 (dd,  $J$  = 16.5, 3.7 Hz, 1 H), 1.60 (ddd,  $J$  = 14.0, 10.1, 3.4 Hz, 1 H), 1.44 (ddd,  $J$  = 14.3, 7.0, 2.4 Hz, 1 H), 1.21 (d,  $J$  = 6.4 Hz, 3 H), 0.95 (t,  $J$  = 7.9 Hz, 9 H), 0.60 (q,  $J$  = 8.0 Hz, 6 H); LRMS (API-ES):  $\text{C}_{13}\text{H}_{29}\text{O}_3\text{Si}^+$  [ $\text{M} + \text{H}$ ]<sup>+</sup>  $m/z$  = 261.2 (100%); FTIR (thin film): 3481 (br), 2957, 2912, 2877, 1713, 1458, 1417, 1374, 1239, 1147, 1117, 1007, 746, colorless oil;

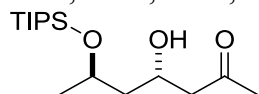

#### **6d**

**Data for 6d:** TLC:  $R_f = 0.15$  (10:90 EtOAc/hexanes);  $^{13}\text{C}$  NMR (500 MHz,  $\text{CDCl}_3$ , 293K)  $\delta = 208.83, 67.6, 64.81, 44.32, 31.00, 23.16, 18.23, 12.49$ ;  $^1\text{H}$  NMR (500 MHz,  $\text{CDCl}_3$ , 293K)  $\delta = 4.45$  (tdd,  $J=8.0, 8.0, 4.2, 2.1$  Hz, 1 H), 4.31 (dd,  $J=5.3, 3.8$  Hz, 1 H), 3.81 (d,  $J=1.8$  Hz, 1 H), 2.62 (dd,  $J=16.8, 8.2$  Hz, 1 H), 2.49 (dd,  $J=16.5, 4.3$  Hz, 1 H), 2.17 (s, 3 H), 1.67 - 1.75 (m, 2 H), 1.48 (ddd,  $J=14.0, 5.2, 2.1$  Hz, 2 H), 1.28 (d,  $J=6.4$  Hz, 3 H), 1.06 (s, 21 H); LRMS (API-ES):  $\text{C}_{16}\text{H}_{35}\text{O}_3\text{Si}^+ [\text{M}+\text{H}]^+ m/z = 303.3$  (100%); FTIR (thin film): 3489, 2943, 2887, 1715, 1464, 1419, 1373, 1256, 1098, 1057, 1014, 833, 877; colorless oil

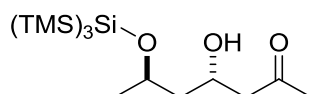

**6e**

**Data for 6e:** TLC:  $R_f = 0.20$  (10:75 EtOAc/hexanes);  $^{13}\text{C}$  NMR (500 MHz,  $\text{CDCl}_3$ , 293K)  $\delta = 208.70, 71.90, 64.79, 51.18, 43.87, 30.99, 22.57, 0.52, 0.51$ ;  $^1\text{H}$  NMR (500 MHz,  $\text{CDCl}_3$ , 293K)  $\delta = 4.34 - 4.41$  (m, 1 H), 3.83 - 3.93 (m, 1 H), 3.75 (s, 1 H), 2.60 (dd,  $J=16.5, 8.2$  Hz, 1 H), 2.46 (dd,  $J=16.5, 4.9$  Hz, 1 H), 2.16 (s, 3 H), 1.63 (ddd,  $J=14.0, 10.2, 3.5$  Hz, 1 H), 1.42 (ddd,  $J=14.3, 5.5, 2.1$  Hz, 1 H), 1.20 (d,  $J=6.4$  Hz, 3 H), 0.18 (s, 27 H); LRMS (API-ES):  $\text{C}_{16}\text{H}_{39}\text{O}_2\text{Si}_4^+ [\text{M} - \text{OH}]^+ m/z = 375.2$  (100%); HRMS (ESI/APCI +):  $\text{C}_{16}\text{H}_{39}\text{O}_2\text{Si}_4^+ [\text{M}+\text{H}-\text{H}_2\text{O}]^+ m/z = 375.2025$  (calc: 375.2027; 0.91 ppm)  $\text{C}_{16}\text{H}_{41}\text{O}_3\text{Si}_4^+ [\text{M}+\text{H}]^+ m/z = 393.2131$  (calc: 393.2133, 0.94 ppm);

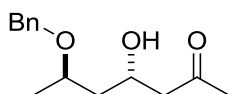

**6f**

**Data for 6f:** TLC:  $R_f = 0.15$  (25:75 EtOAc/hexanes);  $^{13}\text{C}$  NMR (500 MHz,  $\text{CDCl}_3$ , 293K)  $\delta = 209.53, 138.61, 128.53, 127.94, 127.76, 72.23, 70.92, 64.85, 50.50, 43.20, 30.86, 19.66$ ;  $^1\text{H}$  NMR (500 MHz,  $\text{CDCl}_3$ , 293K)  $\delta = 7.35 - 7.41$  (m, 18 H), 7.32 (dd,  $J=4.7, 3.8$  Hz, 1 H), 4.66 (d,  $J=11.3$  Hz, 1 H), 4.48 (d,  $J=11.3$  Hz, 5 H), 4.38 (d,  $J=5.2$  Hz, 1 H), 3.85 - 3.94 (m, 1 H), 3.36 (br. s., 1 H), 2.60 (m,  $J=6.4$  Hz, 2 H), 2.18 (s, 3 H), 1.65 - 1.73 (m, 1 H), 1.58 - 1.65 (m, 1 H), 1.28 (d,  $J=6.1$  Hz, 3 H); (LMRS (API-ES)  $\text{C}_7\text{H}_{13}\text{O}_2^+ [\text{M} - \text{benzyl} - \text{OH} + \text{H}]^+ m/z = 129.1$  (100%); HRMS (ESI-TOF +)  $\text{C}_{14}\text{H}_{21}\text{O}_3^+ [\text{M}+\text{H}]^+ m/z = 237.140909$  (calc: 237.14907, 10 ppm); FTIR (thin film): 3466, 2968, 2931, 1711, 1454, 1419, 1376, 1165, 1095, 1064, 740, 699; colorless oil

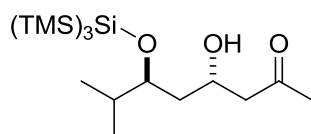

**6g**

**Data for 6g:** TLC:  $R_f = 0.11$  (10:90 EtOAc/hexanes);  $^{13}\text{C}$  NMR (500 MHz,  $\text{CDCl}_3$ , 293K)  $\delta = 203.39, 78.99, 64.88, 51.20, 37.37, 32.89, 30.86, 19.27, 16.38, 0.80$ ;  $^1\text{H}$  NMR (500 MHz,  $\text{CDCl}_3$ , 293K)  $\delta = 4.25$  (dq,  $J=9.9, 4.0, 4.0, 4.0, 2.7$  Hz, 1 H), 3.49 (ddd,  $J=7.8, 5.0, 2.7$  Hz, 1 H), 2.59 (dd,  $J=17.7, 8.2$  Hz, 1 H), 2.53 (dd,  $J=17.1, 4.3$  Hz, 1 H), 2.16 (s, 3 H), 1.82 - 1.92 (m, 1 H), 1.42 - 1.49 (m, 2 H), 1.37 (ddd,  $J=14.0, 7.9, 2.7$  Hz, 2

H), 0.87 (d,  $J=7.0$  Hz, 3 H), 0.81 (d,  $J=7.0$  Hz, 3 H), 0.19 (s, 27 H); LRMS (API-ES):  $C_{18}H_{43}O_2Si_4^+$   $[M-OH]^+$   $m/z = 403.3$  (100%),  $C_{18}H_{45}O_3Si_4^+$   $[M+H]^+$   $m/z = 421.2$  (50%); FTIR (thin film): 3480 (br) 2958, 2895, 1716, 1680, 1367, 1245, 1040, 835, 687; colorless oil.

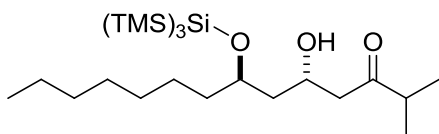

### 6h

**Data for 6h:** TLC:  $R_f = 0.44$  (10:90 EtOAc/hexanes);  $^{13}C$  NMR (500 MHz,  $CDCl_3$ , 293K)  $\delta = 214.53, 76.34, 64.80, 47.92, 41.57, 40.67, 36.20, 31.91, 29.97, 29.41, 25.61, 22.77, 18.17, 18.10, 14.22, 0.61$ ;  $^1H$  NMR (500 MHz,  $CDCl_3$ , 293K)  $\delta = 4.28 - 4.39$  (m, 1 H), 3.79 (s, 1 H), 3.65 (m,  $J=7.6, 5.2, 5.2, 3.1$  Hz, 1 H), 2.66 (dd,  $J=16.9, 7.2$  Hz, 1 H), 2.58 (dq,  $J=13.9, 7.0, 7.0, 7.0, 7.0$  Hz, 1 H), 2.49 (dd,  $J=17.1, 5.2$  Hz, 1 H), 1.47 - 1.64 (m, 4 H), 1.27 (br. s., 10 H), 1.16 (d,  $J=7.9$  Hz, 1 H), 1.08 (d,  $J=7.0$  Hz, 3 H), 0.87 (t,  $J=6.7$  Hz, 3 H), 0.19 (s, 27 H); LRMS (API-ES):  $C_{24}H_{57}O_3Si_4^+$   $[M+H]^+$   $m/z = 505.4$  (100%); FTIR (thin film): 3081, 2958, 2995, 1716, 1879, 1387, 1367, 1245, 1040, 835, 687, 624; colorless oil

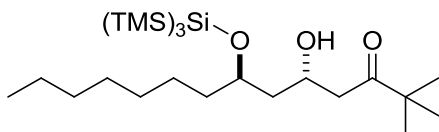

### 6i

**Data for 6i:** TLC:  $R_f = 0$ . (EtOAc/hexanes);  $^{13}C$  NMR (500 MHz,  $CDCl_3$ , 293K)  $\delta = 216.01, 76.20, 64.82, 44.32, 40.90, 36.34, 31.93, 29.99, 29.41, 26.38, 25.52, 27.79, 14.24, 0.62$ ;  $^1H$  NMR (500 MHz,  $CDCl_3$ , 293K)  $\delta = 4.23 - 4.45$  (m, 1 H), 3.82 (s, 1 H), 3.66 (br. s., 1 H), 2.70 (dd,  $J=17.5, 6.9$  Hz, 1 H), 2.53 (dd,  $J=17.4, 5.2$  Hz, 1 H), 1.49 - 1.63 (m, 4 H), 1.28 (br. s., 10 H), 1.19 (br. s., 1 H), 1.12 (s, 9 H), 0.19 (s, 27 H); LRMS (API-ES):  $C_{25}H_{59}O_3Si_4^+$   $[M+H]^+$   $m/z = 519.3$  (100%); FTIR (thin film): 3489, 2956, 2858, 1697, 1465, 1394, 1367, 1245, 1066, 838, 687, 624

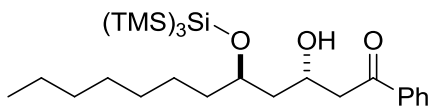

### 6j

**Data for 6j:** TLC:  $R_f = 0.44$  (EtOAc/hexanes);  $^{13}C$  NMR (500 MHz,  $CDCl_3$ , 293K)  $\delta = 199.56, 137.18, 133.34, 128.72, 128.27, 76.52, 65.05, 46.45, 40.61, 36.16, 31.92, 29.98, 29.42, 25.63, 22.79, 14.25, 0.63$ ;  $^1H$  NMR (500 MHz,  $CDCl_3$ , 293K)  $\delta = 7.96$  (d,  $J=7.9$  Hz, 2 H), 7.56 (t,  $J=7.3$  Hz, 1 H), 7.45 (t,  $J=7.3$  Hz, 2 H), 4.51 - 4.59 (m, 1 H), 3.96 (s, 1 H), 3.67 - 3.74 (m, 1 H), 3.23 (dd,  $J=17.1, 6.7$  Hz, 1 H), 3.02 (dd,  $J=16.9, 5.6$  Hz, 1 H), 1.55 - 1.76 (m, 5 H), 1.28 (br. s., 10 H), 1.19 (m,  $J=8.5$  Hz, 1 H), 0.88 (t,  $J=6.7$  Hz, 3 H),



0.20 (s, 27 H); HRMS (CI +)  $C_{27}H_{54}O_3Si_4 [M]^+$   $m/z = 538.3153$  (calc.: 538.3150, 5.6 ppm),  $C_{19}H_{47}O_2Si_4 [M\text{-acetophenone}]^+$   $m/z = 419.2686$  (calc: 419.2653, 8 ppm).

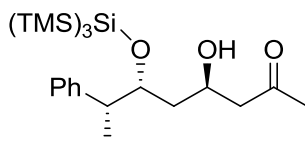

### 6k

**Data for 6k:** TLC:  $R_f = 0.21$  (20:80 Et<sub>2</sub>O/hexanes); FTIR (thin film) 3527, 2951, 2874, 1711, 1458, 1416, 1236, 1080, 1004, 700; LRMS (API-ES +)  $C_{32}H_{74}O_4NaSi_5^+ [M+Na]^+$   $m/z = 685.4$  (100%). <sup>13</sup>C NMR (500 MHz, CDCl<sub>3</sub>)  $\delta = 209.1, 144.0, 128.3, 128.0, 126.3, 78.9, 65.4, 50.8, 43.0, 40.0, 30.6, 15.1, 0.7$ ; <sup>1</sup>H NMR (500 MHz, CDCl<sub>3</sub>)  $\delta = 7.17\text{-}7.28$  (m, 5H), 4.09, (m, 1H), 3.82 (m, 1H), 3.01-3.02 (m, 2H), 2.47-2.52 (m, 2H), 2.14 (s, 3H), 1.43-1.45 (m, 2H), 1.24 (d,  $J = 3$ H), 0.19 (s, 27 H).

### Stereochemical assignment for compounds 6

Compound **6a** was determined to be 1,3-*anti* configured by conversion to SI-1 by the synthetic sequence shown in **Scheme S-8**. 1,3-diol <sup>13</sup>C resonances at  $\delta = 100.2, 29.5, 29.2$  indicated a 1,3-*anti* configuration as established by Rychnovsky.<sup>32,33,34</sup>

### Scheme S-8: Preparation of SI-11

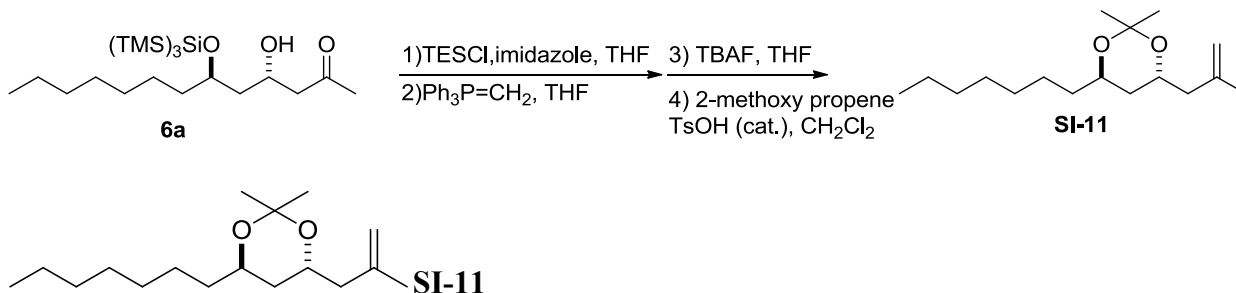

**General Procedure 6:** (1) To a dry 25 mL round bottomed flask was added **3-A** (141 mg, 0.3 mmol) under a N<sub>2</sub> atmosphere. Imidazole (37 mg, 0.54 mmol) was added followed by THF. The stirring reaction flask was cooled to 0 °C. TESCl was then added (75  $\mu$ L, 0.45 mmol) dropwise. The cooling bath was removed and the reaction stirred for an addition 2 h. The reaction was then diluted with H<sub>2</sub>O (10 mL) and hexanes (5 mL). The layers were separated and the organic layer was extracted with EtOAc/Hexanes (1:4, 5 mL). The combined organic layers were washed with H<sub>2</sub>O, NaHCO<sub>3</sub> (sat. aq.) and brine (10 mL each), dried over Na<sub>2</sub>SO<sub>4</sub>, filtered through cotton, and concentrated under reduced pressure. The silyl ether was purified by column chromatography (20 mL silica, 2  $\rightarrow$  5% EtOAc/hexanes eluent) affording a colorless oil (163 mg, 93%).

(2) To a stirring suspension of methyltriphenylphosphium bromide (220mg, 0.53 mmol) in anhydrous THF (1.5 mL) at 0°C was added *n*-Butyllithium (0.210mL, 0.62mmol, 2.5 M hexanes), dropwise. The yellow solution was stirred at this temperature

<sup>32</sup> Rychnovsky, S. D.; Skalitzky, D. J. *Tetrahedron Lett.* **1990**, *31*, 945–948.

<sup>33</sup> Rychnovsky, S. D.; Rogers, B.; Yang, G. *J. Org. Chem.* **1993**, *58*, 3511–3515.

<sup>34</sup> Evans, D. A.; Rieger, D. L.; Gage, J. R. *Tetrahedron Lett.* **1990**, *31*, 7099–7100.

for 45 min then cooled to  $-78^{\circ}\text{C}$ . In a separate flask, the intermediate was described above was dissolved in anhydrous THF (0.3 mL) and added to the ylide solution by syringe, dropwise. The flask was rinsed with 2x 0.2 mL THF and added to the reaction vessel to quantitate the transfer. The reaction was slowly warmed to  $0^{\circ}\text{C}$  over 3 hr and quenched by the addition of 5 mL MeOH/H<sub>2</sub>O (3:2 v/v) and 3 mL of saturated aqueous NH<sub>4</sub>Cl. 20 mL hexanes was then added. The layers were separated and the organic layer was washed with 5 mL of H<sub>2</sub>O and 5 mL of brine. The organic layer was dried over Na<sub>2</sub>SO<sub>4</sub>, filtered through cotton and evaporated. The crude mixture was purified by flash chromatography (16 mL SiO<sub>2</sub> with hexanes as an eluent).

(3) The resulting olefin (145 mg, 92% yield) was dissolved in THF and cooled to  $0^{\circ}\text{C}$  and tetrabutylammonium fluoride (0.50 mL, 0.05 mmol, 1.0M THF) was added dropwise. Gas evolution was observed. The stirring solution was warmed to  $23^{\circ}\text{C}$  and stirred for an additional 30 min. 0.05 mL glacial acetic acid and the reaction was stirred overnight. The solvent was evaporated. The mixture was redissolved in 25 mL ethyl acetate and washed with water (2x 7 mL) and brine (10 mL) the organic layer was dried over Na<sub>2</sub>SO<sub>4</sub>, filtered through cotton and evaporated. The crude reaction mixture was purified by flash chromatography (16 mL SiO<sub>2</sub>) with *i*-PrOH/Hexanes as the eluent (2% → 20% v/v), giving the intermediate diol (55 mg, >95 yield).

(4) The intermediate diol (24 mg, 0.1 mmol) was dissolved in CH<sub>2</sub>Cl<sub>2</sub> (1.0 mL) and cooled to  $0^{\circ}\text{C}$ . 2-methoxypropene (11  $\mu\text{L}$ , 0.11 mmol) was added, followed by *p*-toluenesulfonic acid monohydrate (0.2 mg) was added. The reaction was stirred for 1h and slowly warmed to  $23^{\circ}\text{C}$ . The reaction was quenched by the addition of sat. aq. NaHCO<sub>3</sub> (2 mL). The layers were separated and aqueous layer was extracted with CH<sub>2</sub>Cl<sub>2</sub> (2x 5 mL CH<sub>2</sub>Cl<sub>2</sub>). The organic layer was dried over Na<sub>2</sub>SO<sub>4</sub>, filtered through cotton and evaporated. The crude reaction mixture was purified by flash chromatography (5 mL SiO<sub>2</sub>) with EtOAc/hexanes as an eluent (1% → 5% v/v) to give acetone **SI-11** (22 mg, 78% yield).

**Data for SI-11:** TLC:  $R_f = 0.44$  (5:95 EtOAc/hexanes); FTIR (thin film) 2931, 2856, 1651, 1458, 1378, 1224, 1168, 1028, 889; LRMS (API-ES +): C<sub>17</sub>H<sub>31</sub>O<sup>+</sup> [M - H<sub>2</sub>O + H]<sup>+</sup>  $m/z = 251.2$  (20%). <sup>13</sup>C NMR (500 MHz, CDCl<sub>3</sub>)  $\delta = 142.4, 112.1, 100.2, 66.6, 65.1, 44.1, 38.5, 35.9, 31.8, 29.6, 29.5, 29.2, 25.4, 25.0, 24.8, 22.8, 22.6, 14.1$ ; (500 MHz, CDCl<sub>3</sub>)  $\delta = 4.78$  (s, 1H), 4.74 (s, 1H), 3.97 (app quint,  $J = 6.5\text{Hz}$ , 1H), 3.75 (m, 1H), 2.27 (dd,  $J = 7\text{ Hz}, 9.5\text{ Hz}$ , 1H), 2.11 (dd,  $J = 6\text{ Hz}, 9.5\text{ Hz}$ , 1H), 1.73 (s, 3H), 1.48-1.161 (m, 3H), 1.40-1.44 (m, 2H), 1.36 (s, 3H), 1.34 (s, 3H), 1.25-1.31 (m, 10H), 0.86 (t,  $J = 7\text{ Hz}$ , 1H)

### Synthetic procedures and data for compounds **8**

Compounds **8** were prepared according to **GP 7**, according to Scheme **S-5**<sup>8</sup>

### Scheme **S-9**: synthesis of **8d**

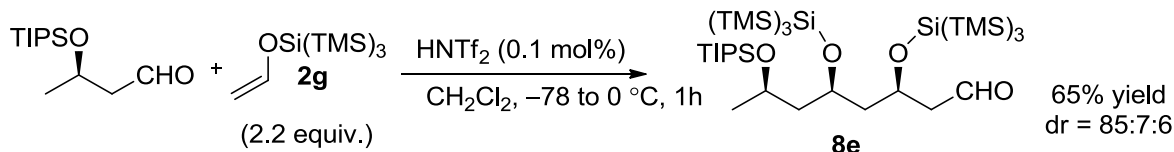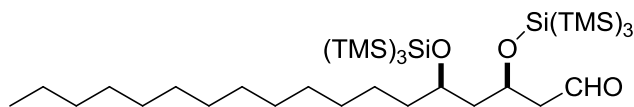

**8a** Known compound<sup>8</sup>

Data for **8a**: TLC: R<sub>f</sub> = 0.49 (20:80 CH<sub>2</sub>Cl<sub>2</sub>/hexanes) FTIR (thin film) 2926, 2896, 2854, 1727, 1466, 1394, 1257, 1084, 836, 687, 624; <sup>13</sup>C NMR (500 MHz, CDCl<sub>3</sub>) δ = 202.4, 73.4, 69.6, 49.5, 43.6, 37.9, 31.9, 29.9, 29.7, 29.7, 29.6, 29.5, 29.4, 29.3, 25.3, 22.7, 14.1, 0.8, 0.6; <sup>1</sup>H NMR (500 MHz, CDCl<sub>3</sub>) δ = 9.77 (dd, 1H, J = 4.0, 1.1 Hz), 4.14–4.08 (m, 1H), 3.39 (app tt, 1H, J = 8.5, 4.3 Hz), 2.57 (ddd, 1H, J = 15.2, 4.7, 1.1 Hz), 2.36 (ddd, 1H, J = 15.2, 6.8, 4.0 Hz), 1.74 (ddd, 1H, J = 14.0, 9.0, 5.5 Hz), 1.64–1.56 (m, 1H), 1.47 (ddd, 1H, J = 13.2, 9.3, 4.0 Hz), 1.33–1.23 (m, 23H), 0.88 (t, 3H, J = 6.8 Hz), 0.19 (s, 27H), 0.18 (s, 27H)

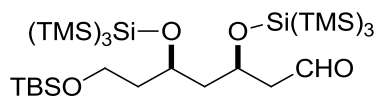

Data for **8b**: TLC: R<sub>f</sub> = 0.07 (25:75 CH<sub>2</sub>Cl<sub>2</sub>/hexanes); <sup>13</sup>C NMR (500 MHz, CDCl<sub>3</sub>) δ = 202.36, 70.86, 69.9, 59.70, 49.71, 43.69, 40.21, 26.08, 18.39, 0.83, 0.67, -5.27, -5.32; <sup>1</sup>H NMR (500 MHz, CDCl<sub>3</sub>) δ = 9.76 (dd, J=3.4, 1.5 Hz, 1 H), 4.07 - 4.22 (m, 1 H), 3.57 - 3.69 (m, 3 H), 2.56 (ddd, J=15.3, 4.5, 1.2 Hz, 1 H), 2.35 (ddd, J=15.3, 6.8, 3.8 Hz, 1 H), 1.95 (dtd, J=12.9, 7.8, 7.8, 4.7 Hz, 1 H), 1.76 (ddd, J=13.7, 8.7, 5.6 Hz, 1 H), 1.47 - 1.55 (m, 2 H), 0.87 (s, 9 H), 0.18 (d, J=1.8 Hz, 54 H), 0.03 (s, 6 H); LRMS (API-ES): C<sub>31</sub>H<sub>80</sub>O<sub>4</sub>NaSi<sub>9</sub><sup>+</sup> [M+Na]<sup>+</sup> m/z = 791.3 (15%)

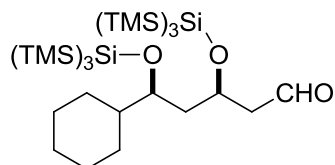

**8c** Known compound<sup>35</sup>

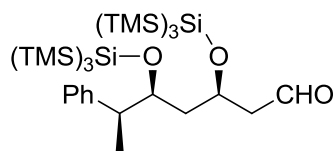

**8d** PB-5135 Known compound<sup>18</sup>

<sup>35</sup> Boxer, M. B.; Yamamoto, H. *J. Am. Chem. Soc.* **2006**, *128*, 48–49.

### General Procedure GP 7

To a flame-dried 50 mL round bottomed-flask was added enolsilane **2g** (960mg, 3.3 mmol, 2.2 equiv.), CH<sub>2</sub>Cl<sub>2</sub> (12 mL), and (*S*) 2-phenyl propanal (199μL, 1.5 mmol). The stirring flask was cooled to -78°C in a dry ice/acetone cooling bath. HNTf<sub>2</sub> (0.010M CH<sub>2</sub>Cl<sub>2</sub>, 100μL) was added dropwise over 2 min. The reaction was stirred at this temperature for 15 min then slowly warmed to 0°C over the course of 1.5h. The reaction was judged to be complete by consumption of **2g**, (*S*) 2-phenyl propanal, and formation of product. The reaction was quenched by addition of 5mL pH 7.0 phosphate buffer and stirred vigorously. The layers were separated and the aqueous phases was extracted with hexanes (3x 5mL). The combined organic layers were dried (Na<sub>2</sub>SO<sub>4</sub>), filtered (cotton plug) and concentrated under reduced pressure. The crude mixture was purified by flash chromatography with CH<sub>2</sub>Cl<sub>2</sub>/hexanes as an eluent (5→20% gradient) to give **8d** as a colorless oil (760 mg, 71%). Previously described compound.

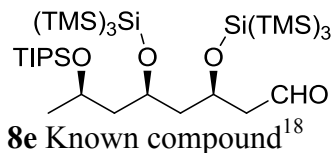

### Synthetic procedures and Data for Compounds 9-12.

Compounds 9 and 10 were synthesized according to **GP 4** and **GP 5**, respectively.

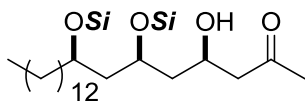

#### 9a

TLC: R<sub>f</sub> = 0.1 (5:95 Et<sub>2</sub>O/hexanes); FTIR (thin film): 3148 (br), 2926, 2854, 1713, 1395, 1366, 1244, 1047, 837, 687; LRMS (APCI -) C<sub>39</sub>H<sub>94</sub>O<sub>4</sub>Si<sub>8</sub><sup>-</sup> [M+<sup>35</sup>Cl]<sup>-</sup> m/z = 885.5 (10%), C<sub>33</sub>H<sub>76</sub>O<sub>4</sub>Si<sub>6</sub><sup>-</sup> [M-TMS<sub>2</sub>]<sup>-</sup> m/z = 703 (100%); <sup>13</sup>C NMR (500 MHz, CDCl<sub>3</sub>) δ = 208.1, 73.8, 73.4, 66.9, 66.9, 51.2, 44.1, 41.8, 38.2, 31.9, 30.5, 29.85, 29.66, 29.64, 29.59, 29.55, 29.45, 29.35, 25.35, 22.7, 14.1, 0.7, 0.6; <sup>1</sup>H NMR 500 MHz, CDCl<sub>3</sub>) δ = 4.35 (br, app tt, J = 6.4, 4.3, 1H), 4.10 (s, 1H), 3.99 (app dq, J = 9.8, 4.2, 1H), 3.34-3.40 (m, 1H), 2.65 (dd, J = 16.4, 6.7 Hz, 1H), 2.45 (dd, J = 16.4, 5.5 Hz), 2.15 (s, 3H), 1.78-1.5 (m, 7H), 1.24-1.34 (m, 24H), 0.88 (t, J = 6.9 Hz, 3H), 0.205 (s, 27H), 0.17 (s, 27H).

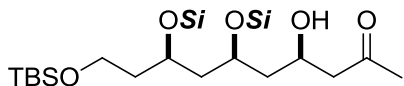

#### 9b

TLC: R<sub>f</sub> = 0.27 (10:90 EtOAc/hexanes); <sup>13</sup>C NMR 500 MHz, CDCl<sub>3</sub>) δ = 208.34, 73.95, 70.79, 67.00, 59.76, 51.42, 43.99, 42.05, 40.48, 30.67, 26.07, 18.39, 0.82, 0.79, -5.32; <sup>1</sup>H NMR 500 MHz, CDCl<sub>3</sub>) δ = 4.17 - 4.29 (m, 1 H), 3.91 (tt, J=8.8, 4.6 Hz, 1 H), 3.77 (s, 1 H), 3.53 - 3.68 (m, 3 H), 2.54 (m, J=15.6, 8.2 Hz, 1 H), 2.49 (dd, J=16.2, 4.3 Hz, 1 H), 2.18 (s, 3 H), 1.98 (dtd, J=12.7, 8.0, 8.0, 4.6 Hz, 1 H), 1.71 (ddd, J=13.0, 9.6, 5.5 Hz, 1 H), 1.63 (ddd, J=14.0, 4.3, 2.7 Hz, 1 H), 1.33 - 1.53 (m, 3 H), 0.87 (s, 9 H), 0.20 - 0.22 (m, 27 H), 0.18 (s, 27 H); LRMS (API-ES) C<sub>34</sub>H<sub>87</sub>O<sup>5</sup>Si<sub>9</sub><sup>+</sup> [M+H]<sup>+</sup> m/z = 827.2 (100%)

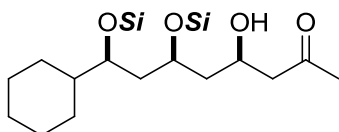

**9c**

TLC:  $R_f$  = 0.29 (10:90 EtOAc/hexanes);  $^{13}\text{C}$  NMR 500 MHz,  $\text{CDCl}_3$ )  $\delta$  = 208.73, 77.54, 73.22, 66.22, 51.33, 43.02, 42.51, 39.80, 30.70, 28.77, 27.53, 27.03, 26.70, 26.43, 0.99, 0.78;  $^1\text{H}$  NMR 500 MHz,  $\text{CDCl}_3$ )  $\delta$  = 4.15 - 4.24 (m, 1 H), 3.84 (ddd,  $J$ =12.8, 8.0, 6.4 Hz, 1 H), 3.57 (d,  $J$ =1.5 Hz, 1 H), 3.33 (dt,  $J$ =8.8, 3.4 Hz, 1 H), 2.50 - 2.56 (m, 2 H), 2.17 (s, 3 H), 1.75 (d,  $J$ =11.0 Hz, 2 H), 1.64 - 1.71 (m, 3 H), 1.52 - 1.58 (m, 2 H), 1.44 - 1.52 (m, 2 H), 1.29 (ddd,  $J$ =13.0, 8.4, 4.0 Hz, 1 H), 1.21 (tt,  $J$ =12.5, 3.1 Hz, 1 H), 1.03 - 1.16 (m, 1 H), 0.97 (qd,  $J$ =12.8, 3.1 Hz, 1 H), 0.20 (s, 27 H), 0.18 (s, 27 H);

LRMS (API-ES):

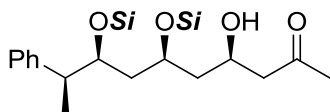

**9d**

$R_f$  = 0.33 (10:90 EtOAc/hexanes);  $^{13}\text{C}$  NMR (500 MHz,  $\text{CDCl}_3$ )  $\delta$  = 209.15, 144.66, 128.52, 128.09, 126.07, 77.13, 71.75, 65.61, 51.08, 43.53, 42.37, 40.84, 30.76, 14.87, 1.05, 0.84; 7.26 - 7.35 (m, 6 H), 7.16 - 7.25 (m, 2 H), 4.20 (dq,  $J$ =9.8, 4.8, 4.8, 2.4 Hz, 1 H), 3.89 - 3.96 (m, 1 H), 3.85 (td,  $J$ =6.5, 3.2 Hz, 1 H), 3.33 (d,  $J$ =2.1 Hz, 1 H), 3.03 (qd,  $J$ =7.0, 3.4 Hz, 1 H), 2.23 (s, 3 H), 1.83 (ddd,  $J$ =13.7, 10.1, 5.8 Hz, 1 H), 1.60 (td,  $J$ =6.4, 4.0 Hz, 3 H), 1.51 (ddd,  $J$ =13.4, 7.6, 2.3 Hz, 1 H), 1.37 (dd,  $J$ =7.2, 2.6 Hz, 1 H), 1.27 (d,  $J$ =7.3 Hz, 1 H), 0.20 (s, 27 H), 0.19 (s, 27 H); LRMS (API-ES):  $\text{C}_{34}\text{H}_{75}\text{O}_3\text{Si}_8^+$  [ $\text{M} - \text{OH}$ ] $^+$   $m/z$  = 755.3 (10%).

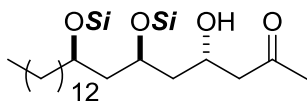

**10a**

$R_f$  = 0.2 (5:95  $\text{Et}_2\text{O}$ /hexanes); FTIR (thin film) 3469 (br), 2948, 2926, 2895, 1717, 1437, 1373, 1244, 1050, 836; LRMS (APCI+)  $\text{C}_{39}\text{H}_{93}\text{O}_3\text{Si}_8^+$  [ $\text{M} - \text{OH}$ ] $^+$   $m/z$  = 833.5 (10%),  $\text{C}_{30}\text{H}_{68}\text{O}_3\text{Si}_4^+$  [ $\text{M} - \text{TMS}_3\text{SiOH}$ ] $^+$   $m/z$  = 587.5 (100%).  $^{13}\text{C}$  NMR (500 MHz,  $\text{CDCl}_3$ )  $\delta$  = 207.3, 74.0, 73.5, 64.8, 51.4, 41.4, 38.9, 38.7, 31.92, 30.94, 29.96, 29.69, 29.65, 29.63, 29.53, 29.35, 25.45, 22.7, 14.1, 0.6, 0.5;  $^1\text{H}$  NMR (500 MHz,  $\text{CDCl}_3$ )  $\delta$  = 4.20-4.24 (m, 1H), 3.91, (app tt,  $J$  = 9.0, 4.5 Hz, 1H), 3.82 (s, 1H), 3.37 (br, app. tt,  $J$  = 9.4, 4.8, 1H), 2.46-2.56 (m, 2H), 2.19 (s, 3H) 1.70 (ddd,  $J$  = 12.5, 10.0, 5.2 Hz, 1H), 1.61-1.67 (m, 2H), 1.37-1.53 (m, 2H) 1.24-1.34 (m, 25 H), 0.88 (t,  $J$  = 3H), 0.21 (s, 27H), 0.17 (s, 27H).

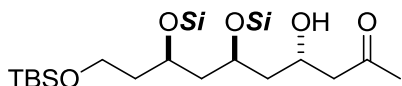

**10b**

TLC:  $R_f$  = 0.40 (10:90 EtOAc/hexanes)  $^{13}\text{C}$  NMR (500 MHz,  $\text{CDCl}_3$ , 295K)  $\delta$  = 207.63, 73.18, 71.18, 64.97, 59.78, 51.44, 41.97, 41.14, 39.42, 31.09, 26.09, 18.37, 0.82, 0.65, -

5.31;  $^1\text{H}$  NMR (500 MHz,  $\text{CDCl}_3$ , 295K)  $\delta$  = 4.34 (br. s., 1 H), 3.93 - 4.05 (m, 2 H), 3.60 - 3.72 (m, 2 H), 3.53 - 3.60 (m, 1 H), 2.61 (dd,  $J$ =16.2, 7.0 Hz, 1 H), 2.46 (dd,  $J$ =16.5, 4.9 Hz, 1 H), 2.17 - 2.19 (m, 1 H), 2.14 - 2.16 (m, 3 H), 1.95 - 2.05 (m, 1 H), 1.64 - 1.76 (m, 4 H), 1.48 - 1.61 (m, 3 H), 0.88 (s, 9 H), 0.20 (s, 27 H), 0.18 (d,  $J$ =1.8 Hz, 25 H), 0.04 (s, 6 H); LRMS (API-ES+)  $\text{C}_{34}\text{H}_{87}\text{O}_5\text{Si}_9^+ [\text{M}+\text{H}]^+$   $m/z$  = 827.2 (100%); colorless oil

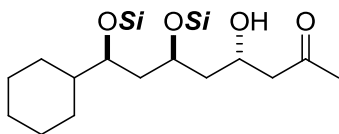

### 10c

$^{13}\text{C}$  NMR (500 MHz,  $\text{CDCl}_3$ , 295K)  $\delta$  = 207.40, 77.75, 74.46, 64.70, 51.59, 44.09, 39.07, 36.68, 31.03, 30.15, 29.85, 27.03, 26.79, 26.40, 26.22, 0.98, 0.62;  $^1\text{H}$  NMR (500 MHz,  $\text{CDCl}_3$ , 295K)  $\delta$  = 4.27 - 4.35 (m, 1 H), 4.14 (s, 1 H), 3.90 - 4.00 (m, 1 H), 3.28 (d,  $J$ =8.5 Hz, 1 H), 2.65 (dd,  $J$ =16.5, 6.4 Hz, 1 H), 2.46 (m,  $J$ =5.8 Hz, 1 H), 2.15 (s, 3 H), 1.68 - 1.83 (m, 5 H), 1.58 - 1.68 (m, 3 H), 1.48 - 1.58 (m, 2 H), 1.11 - 1.36 (m, 3 H), 0.93 - 1.10 (m, 2 H), 0.17 - 0.22 (m, 54 H)

LRMS (API-ES+)  $\text{C}_{32}\text{H}_{79}\text{O}_4\text{Si}_8^+ [\text{M}+\text{H}]^+$   $m/z$  = 751.3 (90%),  $\text{C}_{23}\text{H}_{51}\text{O}_3\text{Si}_4^+ [\text{M} - \text{TMS}_3\text{SiO}]^+$   $m/z$  = 487.4 (100%)

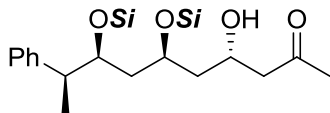

### 10d

$R_f$  = 0.36 (10:90 EtOAc/hexanes)  $^{13}\text{C}$  NMR (500 MHz,  $\text{CDCl}_3$ , 295K)  $\delta$  = 208.08, 142.60, 128.63, 128.11, 126.37, 78.60, 73.26, 64.64, 51.36, 43.54, 40.84, 38.67, 30.99, 29.86, 17.41, 1.33, 0.54;  $^1\text{H}$  NMR (500 MHz,  $\text{CDCl}_3$ , 295K)  $\delta$  = 7.26 - 7.33 (m, 6 H), 7.22 (td,  $J$ =5.7, 2.9 Hz, 1 H), 4.27 - 4.44 (m, 1 H), 3.90 (s, 1 H), 3.86 (sxt,  $J$ =4.3 Hz, 1 H), 3.68 (dt,  $J$ =8.9, 3.4 Hz, 1 H), 3.11 (qd,  $J$ =7.0, 4.1 Hz, 1 H), 2.69 (dd,  $J$ =16.9, 7.2 Hz, 1 H), 2.54 (dd,  $J$ =16.8, 5.2 Hz, 1 H), 2.21 (s, 3 H), 1.77 (ddd,  $J$ =14.3, 10.2, 4.1 Hz, 2 H), 1.53 - 1.68 (m, 3 H), 1.36 (d,  $J$ =7.3 Hz, 3 H), 0.27 (s, 27 H), 0.10 (s, 27 H); LRMS (API-ES+)  $\text{C}_{25}\text{H}_{49}\text{O}_3\text{Si}_4^+ [\text{M} - \text{TMS}_3\text{SiO}]^+$   $m/z$  = 509.3 (100%),  $\text{C}_{34}\text{H}_{77}\text{O}_4\text{Si}_8^+ [\text{M}+\text{H}]^+$   $m/z$  = 773.2 (15%).

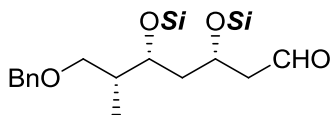

### 12 Prepared according to GP 6

**Data for 12:**  $R_f$  = 0.32 (5:95 EtOAc/hexanes);  $^{13}\text{C}$  NMR (500 MHz,  $\text{CDCl}_3$ , 295K)  $\delta$  = 201.49, 138.76, 128.36, 127.83, 127.50, 75.05, 73.44, 72.71, 69.77, 50.10, 40.01, 38.23, 13.02, 0.9, 0.69;  $^{13}\text{C}$  NMR (500 MHz,  $\text{CDCl}_3$ , 295K)  $\delta$  = 9.80 - 9.86 (m, 1 H), 4.58 (d,  $J$ =12.2 Hz, 1 H), 4.47 (d,  $J$ =11.6 Hz, 1 H), 4.08 (quin,  $J$ =6.0 Hz, 1 H), 3.55 - 3.65 (m, 2 H), 3.27 (t,  $J$ =8.9 Hz, 1 H), 2.63 (ddd,  $J$ =15.6, 6.4, 1.8 Hz, 1 H), 2.51 (ddd,  $J$ =15.6, 5.5, 3.1 Hz, 1 H), 2.03 - 2.13 (m, 1 H), 1.64 - 1.76 (m, 1 H), 1.48 (br. s., 1 H), 0.97 (d,  $J$ =7.0 Hz, 3 H), 0.24 (s, 54 H); LRMS (API-ES+)  $\text{C}_{33}\text{H}_{75}\text{O}_4\text{Si}_8^+ [\text{M}+\text{H}]^+$   $m/z$  = 759.3 (20%);

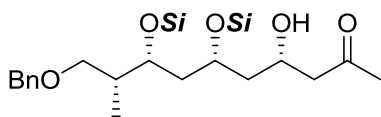

### 13

$R_f = 0.27$  (10:90 EtOAc/hexanes);

$^{13}\text{C}$  NMR (500 MHz,  $\text{CDCl}_3$ , 295K)  $\delta = 208.88, 138.82, 128.33, 127.82, 127.46, 75.32, 73.38, 72.93, 72, 39, 65.75, 51.12, 42.47, 39.48, 38.25, 30.69, 13.06, 0.86, 0.77$ ;  $^1\text{H}$  NMR (500 MHz,  $\text{CDCl}_3$ , 295K)  $\delta = 7.36$  (d,  $J=4.6$  Hz, 4 H), 7.30 (q,  $J=3.9$  Hz, 1 H), 4.57 (d,  $J=11.9$  Hz, 1 H), 4.45 (d,  $J=11.9$  Hz, 1 H), 4.16 - 4.25 (m, 1 H), 3.86 (quin,  $J=6.6$  Hz, 1 H), 3.55 - 3.62 (m, 2 H), 3.48 (s, 1 H), 3.23 (t,  $J=9.0$  Hz, 1 H), 2.53 - 2.62 (m, 2 H), 2.19 - 2.24 (m, 3 H), 2.03 - 2.12 (m, 1 H), 1.62 - 1.70 (m, 1 H), 1.55 - 1.62 (m, 1 H), 1.45 - 1.54 (m, 2 H), 0.96 (d,  $J=6.7$  Hz, 3 H), 0.22 - 0.24 (m, 32 H), 0.21 (s, 27 H); LRMS (API-ES)  $\text{C}_{36}\text{H}_{81}\text{O}_5\text{Si}_8^+$   $[\text{M}+\text{H}]^+$   $m/z = 817.3$  (100%)

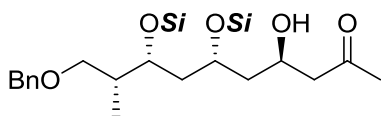

### 14

$^{13}\text{C}$  NMR (500 MHz,  $\text{CDCl}_3$ , 320 K)  $\delta = 207.45, 138.69, 128.39, 127.87, 127.55, 76.52, 74.13, 73.61, 71.67, 64.62, 51.40, 39.39, 36.58, 30.99, 15.09, 0.89, 0.61$ ;  $^1\text{H}$  NMR (500 MHz,  $\text{CDCl}_3$ , 320 K)  $\delta = 7.34 - 7.43$  (m, 4 H), 7.28 - 7.34 (m, 1 H), 4.54 - 4.60 (m, 1 H), 4.44 - 4.52 (m, 1 H), 4.35 (s, 1 H), 4.07 (s, 1 H), 3.94 (s, 1 H), 3.63 - 3.70 (m, 1 H), 3.43 - 3.49 (m, 1 H), 3.21 (t,  $J=9.0$  Hz, 1 H), 2.69 (dd,  $J=16.8, 6.4$  Hz, 1 H), 2.52 (dd,  $J=17.1, 6.1$  Hz, 1 H), 2.19 (br. s, 3 H), 2.12 (dtt,  $J=9.7, 6.5, 6.5, 3.3, 3.3$  Hz, 1 H), 1.62 - 1.76 (m, 3 H), 1.52 - 1.61 (m, 1 H), 1.07 (d,  $J=7.0$  Hz, 3 H), 0.86 - 1.00 (m, 1 H), 0.22 (s, 54 H); LRMS (API-ES)  $\text{C}_{36}\text{H}_{81}\text{O}_5\text{Si}_8^+$   $[\text{M}+\text{H}]^+$   $m/z = 817.3$  (100%);

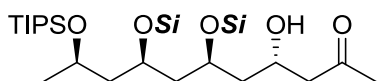

### 10e

TLC:  $R_f = 0.42$  (10:90 EtOAc/hexanes);  $^1\text{H}$  NMR (500 MHz,  $\text{CDCl}_3$ , 320 K)  $\delta = 4.27 - 4.36$  (m, 1 H), 4.04 - 4.14 (m, 1 H), 3.97 (sxt,  $J=4.9$  Hz, 1 H), 3.70 (tt,  $J=9.2, 4.8$  Hz, 1 H), 3.63 (d,  $J=2.4$  Hz, 1 H), 2.55 (dd,  $J=15.6, 8.2$  Hz, 1 H), 2.47 (dd,  $J=16.2, 4.0$  Hz, 1 H), 2.17 (s, 3 H), 2.01 (ddd,  $J=13.3, 8.4, 5.2$  Hz, 1 H), 1.66 - 1.80 (m, 3 H), 1.50 (ddd,  $J=14.3, 5.5, 2.4$  Hz, 1 H), 1.27 - 1.34 (m, 3 H), 1.24 (d,  $J=6.1$  Hz, 3 H), 1.06 (s, 18 H), 0.20 (s, 27 H), 0.19 (s, 27 H);  $^{13}\text{C}$  NMR (500 MHz,  $\text{CDCl}_3$ , 320 K)  $\delta = 208.1, 72.9, 70.0, 66.1, 65.1, 51.2, 48.6, 42.9, 40.3, 30.9, 24.8, 18.44, 18.36, 12.9, 0.9, 0.6$ ; LRMS (API-ES+)  $\text{C}_{38}\text{H}_{94}\text{O}_5\text{NaSi}_9^+$   $[\text{M}+\text{Na}]^+$   $m/z = 905.2$  (100%).

**Stereochemical assignments for compounds 9,10 13, 14:** Compounds 9a was determined to be *syn-syn* by conversion to compound SI-12 according to GP 7 and evaluation of its  $^{13}\text{C}$  NMR shifts according to the method described by Kishi.<sup>36,37</sup>

<sup>36</sup> Kobayashi, Y.; Tan, C.-H.; Kishi, Y. *Journal of the American Chemical Society* **2001**, *123*, 2076–2078.

<sup>37</sup> Kobayashi, Y.; Tan, C.-H.; Kishi, Y. *Helvetica Chimica Acta* **2000**, *83*, 2562–2571.

Resonances at 72.0, 71.3, 70.2 and 68.9 indicated a *syn-syn* configuration. In a similar manner, **10a** was converted to **SI-13** and determined to be *anti-syn* by resonances at 72.0, 71.5, 68.3 and 67.0 (**Scheme S-10**). Compounds **9b**, **9c**, **9d**, **10a**, **10b**, **10c**, **10d** were assigned by analogy.

### Scheme S-10

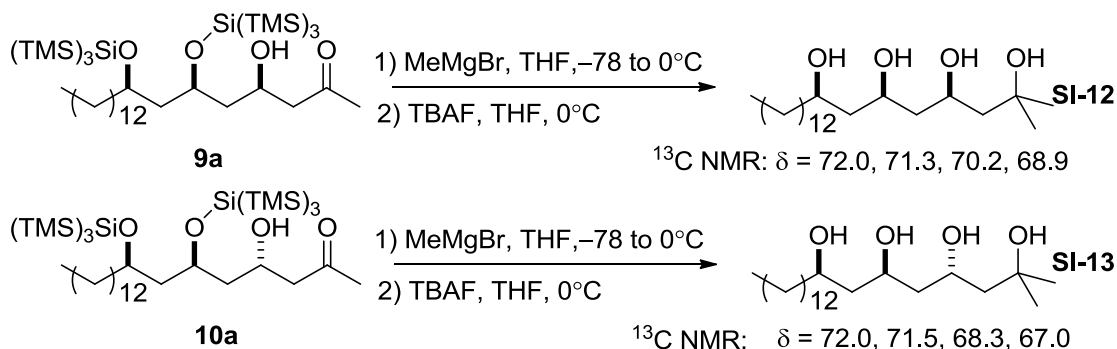

**Stereochemical determination:** The C(6)-C(8)-C(10) stereochemistry of **10e** was assigned *syn-syn*, by previous determination of stereochemistry of **8e**.<sup>18</sup> The C(4) stereochemistry was determined to be (*S*) (1,3-*anti* aldol) by conversion to **SI-14** following procedure **GP6** (**Scheme S-11**). Analysis of the  $^{13}\text{C}$  NMR spectrum indicated C(4)-C(6)-*anti*- stereochemistry ( $\delta = 100.4, 24.9, 25.1$ ).

### Scheme S-11

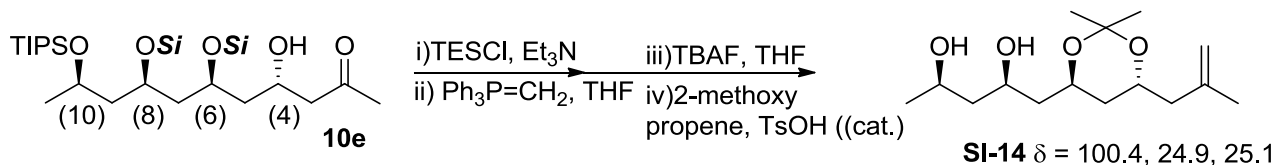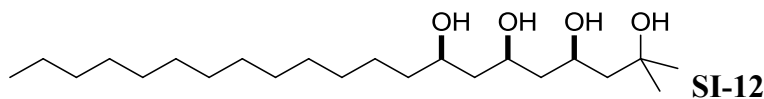

Data for **SI-2**: TLC:  $R_f = 0.11$  (10:90 *i*-PrOH/hexanes); FTIR (thin film) 3370, 2919, 2850, 1467, 1378, 1324, 1132, 847; LRMS (APCI -)  $\text{C}_{22}\text{H}_{46}^{35}\text{ClO}_4^-$   $[\text{M}+^{35}\text{Cl}]^-$   $m/z = 409.2$  (100%),  $\text{C}_{22}\text{H}_{46}^{37}\text{ClO}_4^-$   $[\text{M}+^{37}\text{Cl}]^-$   $m/z = 411.2$  (36%);  $^{13}\text{C}$  NMR (500 MHz,  $\text{CD}_3\text{OD}$ )  $\delta = 71.9, 71.5, 70.4, 46.1, 44.8, 38.6, 32.9, 30.63, 30.57, 30.55, 30.26, 28.7, 26.3, 23.5, 14.4$ ;  $^1\text{H}$  NMR (500 MHz,  $\text{CD}_3\text{OD}$ )  $\delta = 4.15$  (dddd,  $J = 7.6, 7.5, 5.2, 5.0$  Hz, 1H), 3.97 (app tt,  $J = 8.3, 4.4$ , 1H), 3.71-3.77 (m, 1H), 1.50-1.64 (m, 5H), 1.38-1.48 (m, 3H), 1.24-1.34 (m, 25H), 1.23 (s, 3H), 0.88 (t,  $J = 6.9$  Hz, 3H).

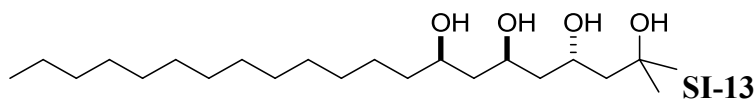



**Data for SI-13:** TLC:  $R_f = 0.26$  (15:85 *i*-PrOH/hexanes); FTIR (thin film) 3349 (br), 2919, 2850, 2496, 1468, 1378, 1137, 1081, 740.1, LRMS(APCI - )  $C_{22}H_{46}^{35}ClO_4^-$   $[M+^{35}Cl]^-$   $m/z = 409.2$  (100%),  $C_{22}H_{46}^{37}ClO_4^-$   $[M+^{37}Cl]^-$   $m/z = 411.2$  (37%);  $^{13}C$  NMR (500 MHz,  $CD_3OD$ )  $\delta = 72.0, 71.5, 68.3, 67.0, 46.6, 45.3, 38.6, 32.9, 30.72, 30.66, 30.35, 28.7, 26.4, 23.6, 14.4$ ;  $^1H$  NMR (500 MHz,  $CD_3OD$ )  $\delta = 4.21$  (br, app.  $t$   $J = 4.3$  Hz, 1H), 3.98-4.04 (m, 1H), 3.72-3.78 (m, 1H) 1.55-1.65 (m, 6H), 1.34-1.38 (m, 6 H), 1.25-1.31 (m, 35H), 1.23 (s, 3H), 0.88 (t,  $J = 7$  Hz, 1H).

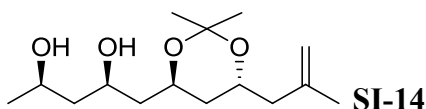

**Data for SI-4:**  $^1H$  NMR (500 MHz,  $CDCl_3$ )  $\delta = 4.78$  (s, 3 H), 4.74 (s, 1 H), 3.93 - 4.03 (m, 4 H), 2.28 (dd,  $J=14.3, 7.6$  Hz, 1 H), 2.13 (dd,  $J=14.3, 5.8$  Hz, 1 H), 1.83 (dt,  $J=14.0, 7.2$  Hz, 1 H), 1.74 (s, 3 H), 1.55 - 1.65 (m, 3 H), 1.45 - 1.53 (m, 2 H), 1.36 (s, 3 H), 1.34 (s, 3 H), 1.17 (d,  $J=6.1$  Hz, 3 H);  $^{13}C$  NMR (500 MHz,  $CDCl_3$ )  $\delta = 142.4, 112.3, 100.4, 65.7, 65.2, 65.1, 63.0, 44.2, 42.4, 38.6, 38.3, 25.1, 24.9, 23.0, 22.4$ ; LRMS (API-ES+)  $C_{12}H_{21}O_2^+$   $[M - \text{acetone} - OH]^+$   $m/z = 197.0$  (95%).

### Synthetic Procedures, Stereochemical determination, and data for 15, 16, 17, 18

Compound **15a**, **15b**, **15c**, and **17** were prepared according to published procedure<sup>38</sup>.

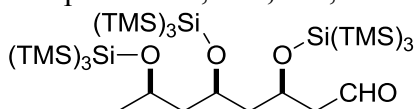

**15a**  
 $^{13}C$  NMR (500 MHz,  $CDCl_3$ , 290 K)  $\delta = 202.24, 69.80, 69.76, 69.12, 49.95, 48.58, 44.36, 24.51, 0.96, 0.75$ ;  $^1H$  NMR (500 MHz,  $CDCl_3$ , 290 K)  $\delta = 9.75$  (t,  $J=2.1$  Hz, 1 H), 4.18 - 4.31 (m, 1 H), 3.65 (qd,  $J=8.9, 4.6$  Hz, 2 H), 2.50 (ddd,  $J=15.4, 3.7, 1.8$  Hz, 1 H), 2.33 (ddd,  $J=15.3, 8.9, 3.7$  Hz, 1 H), 1.95 (ddd,  $J=12.8, 9.8, 4.9$  Hz, 1 H), 1.75 (ddd,  $J=12.8, 9.8, 5.5$  Hz, 1 H), 1.48 (ddd,  $J=12.8, 9.2, 3.7$  Hz, 1 H), 1.16 - 1.22 (m, 1 H), 1.17 (br. s., 3 H), 0.18 (s, 81 H); LRMS (API-ES +)  $C_{26}H_{67}O_3Si_8^+$   $[M - TMS_3SiO]^+$   $m/z = 651.2$  (80%)

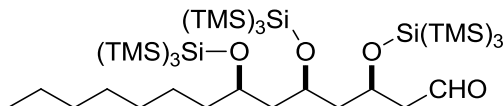

**15b**  
Known compound<sup>21</sup>

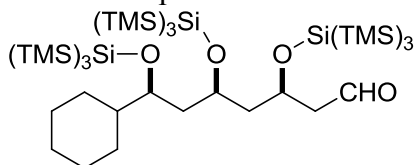

<sup>38</sup> Albert, B. J.; Yamamoto, H. *Angew. Chem. Int. Ed.* **2010**, *49*, 2747-2749.

Known compound<sup>21</sup>

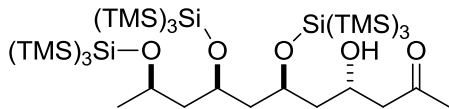

**16a** Prepared according to **GP 4**

<sup>13</sup>C NMR (500 MHz, CDCl<sub>3</sub>, 290 K)  $\delta$  = 208.73, 72.14, 69.71, 69.36, 65.05, 51.23, 48.84, 43.90, 41.49, 30.97, 24.47, 1.03, 0.81; <sup>1</sup>H NMR (500 MHz, CDCl<sub>3</sub>, 290 K)  $\delta$  = 4.22 - 4.38 (m, 1 H), 3.88 - 4.04 (m, 1 H), 3.66 (m,  $J$ =3.4 Hz, 2 H), 3.30 (d,  $J$ =3.1 Hz, 1 H), 2.48 - 2.59 (m, 2 H), 2.17 (s, 3 H), 1.95 (ddd,  $J$ =13.1, 9.5, 4.9 Hz, 1 H), 1.65 - 1.75 (m, 2 H), 1.56 (ddd,  $J$ =13.0, 9.5, 3.5 Hz, 1 H), 1.44 (ddd,  $J$ =14.0, 7.0, 2.7 Hz, 1 H), 1.17 (d,  $J$ =6.1 Hz, 3 H), 0.16 - 0.22 (m, 81 H); LRMS (API-ES<sup>+</sup>) C<sub>44</sub>H<sub>113</sub>O<sub>5</sub>Si<sub>12</sub><sup>+</sup> [M+H]<sup>+</sup>  $m/z$  = 973.5 (100%);

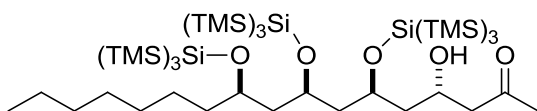

**16b** Prepared according to **GP 4**

<sup>13</sup>C NMR (500 MHz, CDCl<sub>3</sub>, 290 K)  $\delta$  = 208.97, 77.68, 72.03, 69.90, 64.93, 51.30, 41.57, 30.95, 27.12, 26.83, 26.27, 1.15, 1.10, 0.84; <sup>1</sup>H NMR (500 MHz, CDCl<sub>3</sub>, 290 K)  $\delta$  = 4.27 - 4.37 (m, 1 H), 3.94 (br. s., 1 H), 3.69 (tt,  $J$ =9.3, 4.6 Hz, 1 H), 3.34 (d,  $J$ =9.8 Hz, 1 H), 3.17 (d,  $J$ =3.1 Hz, 1 H), 2.52 (d,  $J$ =5.8 Hz, 2 H), 2.18 (s, 3 H), 1.67 - 1.85 (m, 5 H), 1.50 - 1.66 (m, 4 H), 1.48 (br. s., 0 H), 1.01 - 1.33 (m, 5 H), 0.20 (d,  $J$ =2.1 Hz, 81 H); C<sub>44</sub>H<sub>112</sub>O<sub>5</sub>Si<sub>12</sub><sup>+</sup> [M+H]<sup>+</sup>  $m/z$  = 1057.5 (100%);

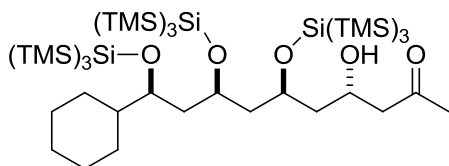

**16c** Prepared according to **GP 4** <sup>13</sup>C NMR (500 MHz, CDCl<sub>3</sub>, 290 K)  $\delta$  = 208.86, 73.68, 71.88, 69.59, 65.03, 51.23, 46.05, 43.95, 41.68, 38.65, 31.80, 30.95, 29.91, 29.38, 26.20, 22.76, 14.28, 1.00, 0.87, 0.83; <sup>13</sup>C NMR (500 MHz, CDCl<sub>3</sub>, 290 K)  $\delta$  = 4.26 - 4.40 (m, 1 H), 3.88 - 4.10 (m, 1 H), 3.71 (d,  $J$ =4.0 Hz, 1 H), 3.40 (br. s., 1 H), 3.21 (d,  $J$ =3.7 Hz, 1 H), 2.52 (d,  $J$ =5.8 Hz, 2 H), 2.18 (s, 3 H), 1.80 (t,  $J$ =8.9 Hz, 1 H), 1.62 - 1.74 (m, 3 H), 1.47 - 1.57 (m, 1 H), 1.36 - 1.45 (m, 2 H), 1.15 - 1.34 (m, 12 H), 0.84 - 0.94 (m, 3 H), 0.14 - 0.27 (m, 81 H); LMRS (API-ES) C<sub>43</sub>H<sub>108</sub>O<sub>5</sub>Si<sub>12</sub><sup>+</sup> [M+H]<sup>+</sup>  $m/z$  = 1041.5 (100%)

**Stereochemical determination of 16a:** There stereochemistry of **16a** was confirmed by derivatization to **SI-5**, by a 1,3-*syn*- selective chelation controlled reduction followed by desilylation (**Scheme S-12**). The stereochemistry of resultant penta-ol **SI-15** was determined as follows: C(2),C(4), C(6) was assigned to be *syn-syn* based on the stereochemical outcome of the tri-aldol cascade to form **15a**.<sup>21</sup>The C(8)-C(10) *syn* stereochemistry was assigned to the literature precedent of 1,3-chelation controlled-*syn*

reduction.<sup>39</sup> Finally, <sup>13</sup>C NMR analysis revealed PB-5149 to possess C<sub>1</sub>-symmetry, indicating C(6)-C(8) *anti*-relationship resulting from a 1,3-*anti* aldol addition to **15a**. **16b** and **16c** were assigned by analogy.

### Scheme S-12

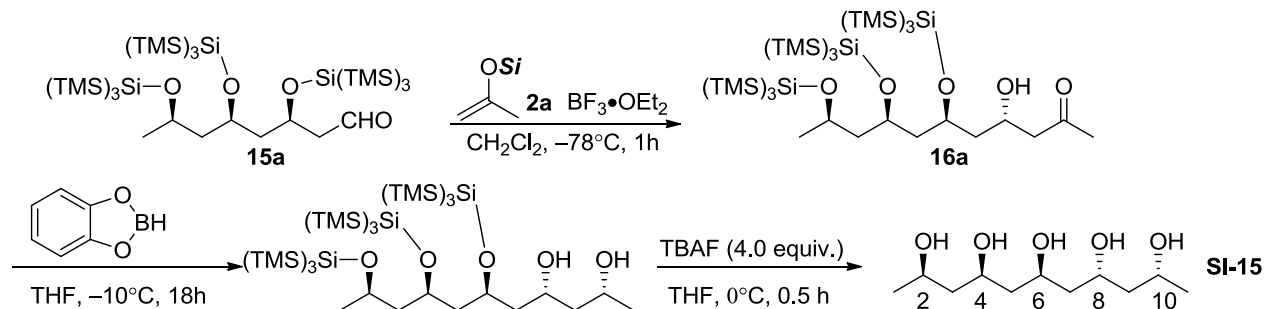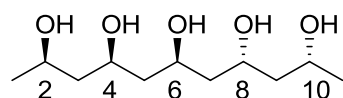

**Data for SI-15** <sup>1</sup>H NMR (500MHz, CD<sub>3</sub>OD, 294K)  $\delta$  = 3.98 - 4.06 (m, 2 H), 3.91 - 3.98 (m, 3 H), 1.65 - 1.69 (m, 1 H), 1.61 - 1.65 (m, 1 H), 1.57 - 1.61 (m, 2 H), 1.52 - 1.57 (m, 2 H), 1.49 (ddd,  $J$ =14.0, 5.2, 4.3 Hz, 1 H), 1.18 (d,  $J$ =6.1 Hz, 6 H); <sup>13</sup>C NMR (500MHz, CD<sub>3</sub>OD, 294K)  $\delta$  = 70.16, 68.08, 67.90, 67.34, 67.32, 47.50, 46.88, 46.07, 45.97, 23.68, 23.66; LRMS (API-ES +) C<sub>11</sub>H<sub>24</sub>NaO<sub>5</sub><sup>+</sup> [M+Na]<sup>+</sup>  $m/z$  = 259.2 (100%), C<sub>11</sub>H<sub>25</sub>O<sub>5</sub><sup>+</sup> [M+H]<sup>+</sup>  $m/z$  237.2 (40%); LRMS (API-ES -) C<sub>11</sub>H<sub>24</sub><sup>35</sup>ClO<sub>5</sub><sup>-</sup> [M+<sup>35</sup>Cl]<sup>-</sup>  $m/z$  = 271.0 (100%), C<sub>11</sub>H<sub>24</sub><sup>37</sup>ClO<sub>5</sub><sup>-</sup> [M+<sup>37</sup>Cl]<sup>-</sup>  $m/z$  = 273.1 (30%); HRMS-TOF (ESI/CI multimode +): C<sub>11</sub>H<sub>25</sub>O<sub>5</sub><sup>+</sup> [M+H]<sup>+</sup>  $m/z$  = 237.1703 (calc: 237.17023, 0.2 ppm); HRMS-TOF (ESI/CI multimode -): C<sub>11</sub>H<sub>24</sub><sup>35</sup>ClO<sub>5</sub><sup>-</sup>  $m/z$  = 271.1310 (calc: 271.13125, 0.9 ppm)

### Additional data for eq. 3,4,5

In order to determine diastereoselection for the overall tetra-aldol process of eq. 5 compound **18**, the individual aldol steps were evaluated using diastereomerically pure aldehyde substrates.

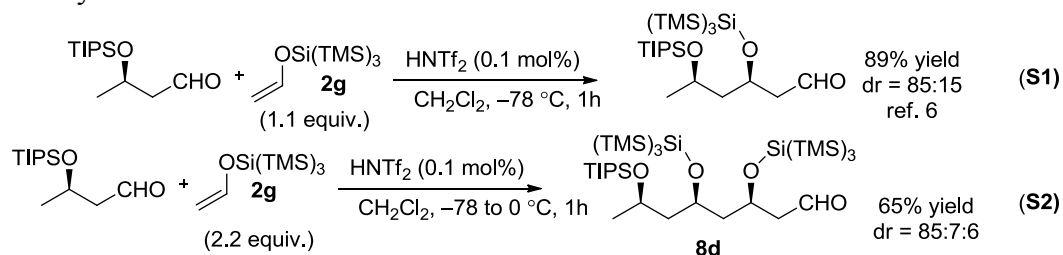

<sup>39</sup> Evans et. al. *J. Org. Chem.* **1990**, *55*, 5190.

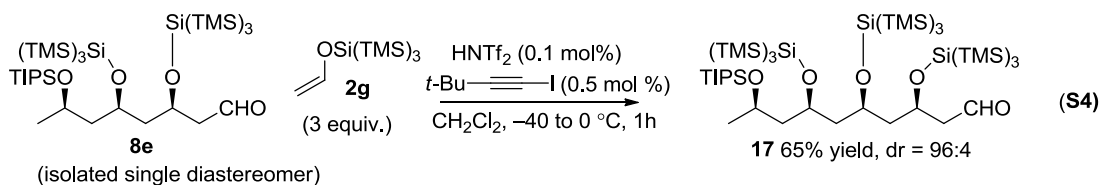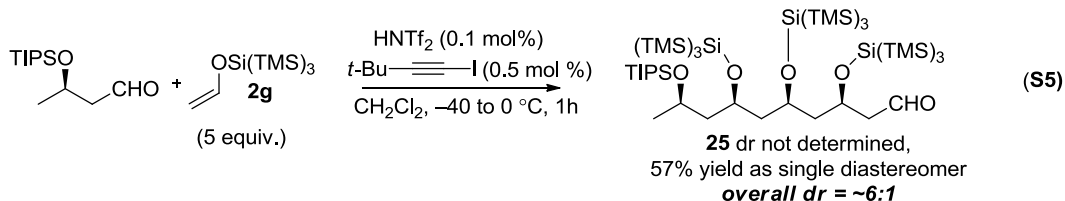

Aldol reaction of **23** and **17** yields **25** with excellent diastereoselectivity. Because the dr of the triple aldol reaction of **17** and *R*-3-(TIPSOxy)butanal (eq. **S5**) cannot be directly determined by <sup>1</sup>H NMR, the dr can be inferred by comparing eq. **S4** and eq. **S2**. Thus the diastereoselectivity of **S5** can be estimated at ~5:1.

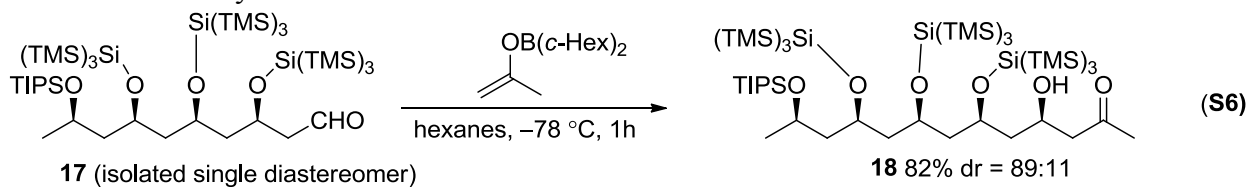

Reaction of **17** with acetone enolborinate by **GP 4** gives product **18** in good selectivity dr = 89:11. The overall diastereoselectivity (ds) of the tetraaldol sequence in eq. 5, therefore is approximately 75%

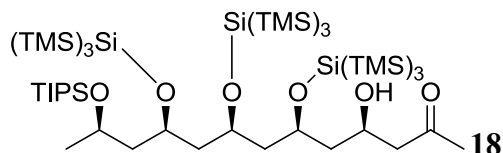

**Data for 26:** TLC:  $R_f = 0.58$  (10:90 EtOAc/hexanes); <sup>1</sup>H NMR (500 MHz, C<sub>6</sub>D<sub>6</sub>, 333K)  $\delta = 4.55 - 4.64$  (m, 1 H), 4.37 - 4.45 (m, 1 H), 4.24 (tt,  $J=9.0, 4.4$  Hz, 1 H), 4.14 - 4.21 (m, 1 H), 4.10 (tt,  $J=9.0, 4.4$  Hz, 1 H), 2.40 - 2.57 (m, 2 H), 2.21 - 2.30 (m, 1 H), 2.13 - 2.20 (m, 2 H), 2.09 (ddd,  $J=12.9, 9.7, 5.3$  Hz, 1 H), 1.92 - 2.01 (m, 1 H), 1.88 (ddd,  $J=12.5, 8.9, 3.5$  Hz, 1 H), 1.81 (s, 3 H), 1.61 (d,  $J=6.0$  Hz, 3 H), 1.33 - 1.39 (m, 21 H), 0.53 (s, 27 H), 0.47 - 0.50 (m, 54 H); <sup>13</sup>C NMR (500 MHz, C<sub>6</sub>D<sub>6</sub>, 333K)  $\delta = 207.3, 73.5, 71.3, 70.4, 66.9, 65.7, 50.9, 48.1, 46.5, 46.2, 45.1, 30.0, 24.4, 18.8, 18.7, 13.2, 1.5, 1.32, 1.27$ ; LRMS (API-ES+) C<sub>49</sub>H<sub>123</sub>O<sub>5</sub>Si<sub>13</sub><sup>+</sup> [M-OH]<sup>+</sup>  $m/z = 1155.5$  (22%), C<sub>9</sub>H<sub>27</sub>Si<sub>4</sub><sup>+</sup> [TMS<sub>3</sub>Si]<sup>+</sup>  $m/z = 247.3$  (95%). FTIR (thin film): 3521 (br), 2947, 2894, 2867, 1715, 1376, 1244, 1034, 835, 686, 624.

**Stereochemical assignment:** **18** was determined to be C(4)-C(6)-C(8)-C(10)-(C12)-*syn-syn-syn-syn*-configured by previous determination of the stereochemistry of intermediate **17**. The C(4) stereochemistry was determined to be (*R*) by conversion to C<sub>2</sub>-symmetric *meso*-hexa-ol **SI-16** by a *syn*-selective<sup>22</sup> reduction and desilylation sequences shown in

**Scheme S-13.**  $C_2$ - symmetry was inferred from the simplicity of  $^{13}\text{C}$  NMR spectrum: resonances at  $\delta = 70.1, 70.0, 67.3, 46.8, 45.4, 45.3, 23.7$  ppm.

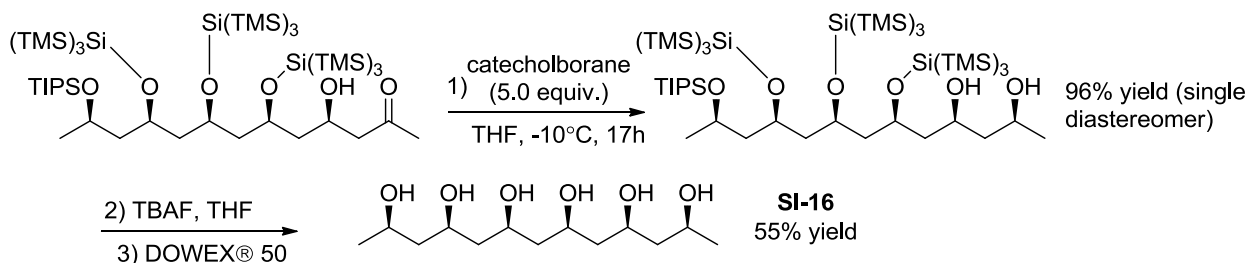

**Scheme S-13: Synthesis of hexa-ol SI-16**

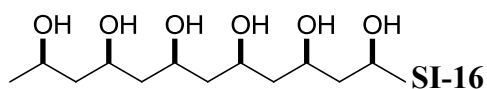

(1) A 25 mL flame-dried round-bottomed flask with magnetic stir bar was charged with ketone **26** (171mg, 0.15 mmol), fitted with a rubber septum, and purged with  $\text{N}_2$ . THF (1 mL) was added and the reaction was stirred and cooled to  $-10^\circ\text{C}$ . Catecholborane (0.75 mL, 1.0 M THF, obtained from Sigma-Aldrich) was added dropwise. The reaction was stirred overnight, then quenched by addition of methanol (1mL) and NaK tatrata solution (sat. aq., 2mL). The biphasic mixture was stirred at r.t. for 2 hrs, then extracted with  $\text{CH}_2\text{Cl}_2$  (3x 5 mL). The combined organic layers were dried ( $\text{Na}_2\text{SO}_4$ ), filtered through cotton, and concentrated. Flash chromatography (35mL  $\text{SiO}_2$ , 0.5  $\rightarrow$  5% v/v EtOAc/hexanes eluent) yield the intermediate diol (166mg, 94% yield). (2) The intermediate diol (166 mg, 0.141 mmol) was added to a dry 25 mL round-bottomed flask containing a magnetic stir bar and fitted with a septum. THF (1.0 mL) was added, the reaction cooled to  $0^\circ\text{C}$  and TBAF (0.8 mL, 1.0 THF) was added dropwise (gas evolution observed). The reaction was stirred for 1 h, and the volatiles were then removed by evacuation. 15 mL  $\text{H}_2\text{O}$  was added, the aqueous layer was extracted with  $\text{CH}_2\text{Cl}_2$ ,  $\text{Et}_2\text{O}$ , and EtOAc (5 mL each). The aqueous layer was concentrated, revealing the product contaminated with a large excess of  $\text{Bu}_4\text{N}^+\text{X}^-$ . (3) The mixture was purified by passing through a column of DOWEX® -50WX8-200 ion exchange resin (30g, pretreated by elution of MeOH (100mL), 1N HCl (100mL) and  $\text{H}_2\text{O}$  (100mL) eluting with 1 N  $\text{NH}_4\text{OH}$ . Evaporation of the volatiles gave **SI-16** (20 mg, 54% yield).

**Data for SI-16:**  $^1\text{H}$  NMR (500 MHz,  $\text{CD}_3\text{OD}$ )  $\delta = 3.88 - 4.06$  (m, 6 H), 1.50 - 1.74 (m, 10 H), 1.18 (d,  $J=6.1$  Hz, 6 H);  $^{13}\text{C}$  NMR (500 MHz,  $\text{CD}_3\text{OD}$ )  $\delta = 70.1, 70.0, 67.3, 46.8, 45.4, 45.3, 23.7$ ; LRMS (API-ES  $-$ )  $\text{C}_{13}\text{H}_{27}\text{O}_6^-$   $[\text{M}-\text{H}]^-$   $m/z = 279.1$  (100%);

**Synthetic Procedures, Stereochemical Assignments, and Data for Compounds 20, 21, and 22**

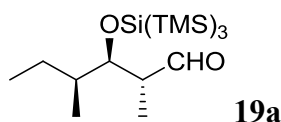

Known compound.<sup>13</sup> Prepared by Me<sub>2</sub>AlNTf<sub>2</sub>-catalyzed aldol reaction of **E-23** and (*S*)-2-methyl propanal. Stereochemistry previously determined.

**Data for 19a:** TLC: (CH<sub>2</sub>Cl<sub>2</sub>:hexanes, 25:75)R<sub>f</sub> = 0.38; <sup>1</sup>H NMR (500 MHz, C<sub>6</sub>D<sub>6</sub>, dr = 88:8:4) δ 9.73 (d, *J*=1.8 Hz, 1 H), 3.53 (t, *J*=3.9 Hz, 1 H), 2.36 (ddd, *J*=7.1, 3.4, 2.0 Hz, 1 H), 1.43 - 1.55 (m, 2 H), 1.00 (d, *J*=7.1 Hz, 3 H), 0.84 - 0.95 (m, 1 H), 0.82 (t, *J*=7.1 Hz, 3 H), 0.77 (d, *J*=7.0 Hz, 3 H), 0.25 (s, 27 H); FTIR (thin film): 2961, 2893, 1724, 1459, 1425, 1245, 1023, 834, 756, 687, 624; <sup>13</sup>C NMR (500 MHz, C<sub>6</sub>D<sub>6</sub>, dr = 88:8:4) δ = 202.5, 83.6, 49.7, 40.5, 26.8, 15.6, 12.3, 12.1, 0.9; LRMS (APCI+) C<sub>9</sub>H<sub>28</sub>OSi<sub>4</sub>Na<sup>+</sup> [TMS<sub>3</sub>SiOHNa]<sup>+</sup> m/z = 288.1 (100%), C<sub>17</sub>H<sub>43</sub>O<sub>2</sub>Si<sub>4</sub><sup>+</sup> [M+H]<sup>+</sup> m/z = 391.2 (30%). [α]<sub>D</sub><sup>24</sup> = -12.020° (c 1.00, CH<sub>2</sub>Cl<sub>2</sub>).

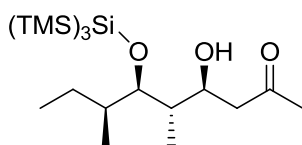

**22a** Prepared according to **GP: 4** with the following modifications: Acetone 9-BBN enolborinate must be generated at -78 °C, rather than 0 °C as it is unstable at higher temperatures. A solution of the aldehyde is therefore added to a stirring solution of enolborinate at -78 °C.

**Data for 22a:** <sup>1</sup>H NMR (500 MHz, CDCl<sub>3</sub>) δ = 3.97 (tt, *J*=9.2, 2.6 Hz, 1 H), 3.64 (dd, *J*=2.4, 0.9 Hz, 1 H), 3.49 (dd, *J*=4.9, 3.1 Hz, 1 H), 2.63 (dd, *J*=15.9, 2.6 Hz, 1 H), 2.44 (dd, *J*=15.9, 9.5 Hz, 1 H), 2.20 (s, 3 H), 1.83 - 1.92 (m, 1 H), 1.67 - 1.77 (m, 0 H), 1.48 - 1.58 (m, 2 H), 1.08 - 1.19 (m, 1 H), 0.87 - 0.93 (m, 3 H), 0.85 (d, *J*=6.9 Hz, 3 H), 0.82 (d, *J*=7.0 Hz, 3 H), 0.22 (s, 27 H); <sup>13</sup>C NMR (500 MHz, CDCl<sub>3</sub>) δ = 209.5, 84.5, 70.5, 48.7, 41.4, 39.7, 30.9, 25.0, 15.7, 15.4, 12.2, 0.9; FTIR (thin film) 3497 (br), 2961, 2894, 1711, 1380, 1244, 1041, 836, 687; LRMS (APCI+): C<sub>20</sub>H<sub>49</sub>O<sub>3</sub>Si<sub>4</sub><sup>+</sup> [M+H]<sup>+</sup> m/z = 449.2 (100%), C<sub>20</sub>H<sub>47</sub>O<sub>2</sub>Si<sub>4</sub><sup>+</sup> [M - OH]<sup>+</sup> m/z = 431.2 (65%).

#### Procedure for one-pot *anti*-propionaldehyde, *anti*-acetone addition: **GP 7**

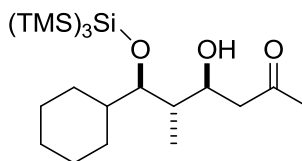

#### **22b**

**General procedure GP 7:** An oven-dried 10 mL pear-shaped flask (primary reaction flask) was equipped with a magnetic stir bar and septum, then charged with **E-23** (96 mg, 0.315 mmol), CH<sub>2</sub>Cl<sub>2</sub> (2 mL) and cyclohexane carboxyaldehyde (36.5 μL, 0.3 mmol). The stirring reaction was cooled to -78 °C, and HNTf<sub>2</sub> was added dropwise (30 mL, 0.01M CH<sub>2</sub>Cl<sub>2</sub> 3 x 10<sup>-4</sup> mmol). The reaction was stirred at this temperature for 1.5 h, then warmed to -45 °C, stirred for 30min, then re-cooled to -78 °C, at which point <3 μL Et<sub>3</sub>N was added to quench the Lewis acid catalyst. Simultaneously, an oven-dried secondary reaction flask (25 mL round-bottomed) was charged with toluene (1.5 mL), acetone (26

$\mu\text{L}$ , 0.36 mmol), and  $\text{Et}_3\text{N}$  (56  $\mu\text{L}$ , 0.39 mmol). The stirring flask was cooled to  $-78^\circ\text{C}$ , at which point 9-BBN OTf (0.5 M hexanes, 0.720 mL) was added dropwise, with immediate formation of a white precipitate. After stirring for 15 min, the contents of the primary reaction flask were slowly cannulated to the secondary reaction flask over 3 min, down the side of the flask to minimize local heating. The primary flask was rinsed (2 x 0.3 mL). The reaction was stirred for 45 min at  $-78^\circ\text{C}$  then warmed to  $-45^\circ\text{C}$ . The reaction was quenched by addition of MeOH (0.2 mL) and pH 7.0 buffer (0.2 M, 4 mL), warmed to  $0^\circ\text{C}$ , and stirred vigorously.  $\text{Et}_2\text{O}$  was then added (2 mL), followed by 1 mL 3:1 MeOH/ $\text{H}_2\text{O}_2$  (30% aq.). The biphasic mixture was stirred vigorously for 0.5 h.  $\text{H}_2\text{O}$  was added (5 mL), and the layers were separated. The aqueous layer was extracted (3x 3 mL  $\text{Et}_2\text{O}$ ), and the combined organic layers were washed with  $\text{NaHCO}_3$ , dried ( $\text{Na}_2\text{SO}_4$ ), filtered (cotton plug) and concentrated. The mixture was purified by flash chromatography (16 mL  $\text{SiO}_2$ , EtOAc/Hex 0.5 $\rightarrow$ 3% v/v). 135 mg, 95% yield colorless oil.

TLC:  $R_f = 0.27$  (10:90 EtOAc/Hexanes);  $^{13}\text{C}$  NMR (500 MHz,  $\text{CDCl}_3$ )  $\delta = 209.2, 85.6, 70.5, 48.7, 43.7, 40.7, 30.8, 29.6, 27.4, 26.6, 26.2, 16.4, 0.8$ ;  $^1\text{H}$  NMR (500 MHz,  $\text{CDCl}_3$ )  $\delta = 3.99$  (tt,  $J=9.2, 2.2$  Hz, 1 H), 3.67 (t,  $J=0.9$  Hz, 1 H), 3.34 (t,  $J=4.1$  Hz, 1 H), 2.60 (dd,  $J=15.4, 2.9$  Hz, 1 H), 2.42 (dd,  $J=15.6, 9.5$  Hz, 1 H), 2.18 (s, 3 H), 1.70 - 1.78 (m, 3 H), 1.61 - 1.68 (m, 2 H), 1.50 - 1.57 (m, 2 H), 1.09 - 1.25 (m, 3 H), 0.97 - 1.08 (m, 1 H), 0.80 (d,  $J=7.0$  Hz, 3 H), 0.19 - 0.23 (m, 27 H); LRMS (API-ES):  $\text{C}_{22}\text{H}_{51}\text{O}_3\text{Si}_4^+ [\text{M}+\text{H}]^+ m/z = 475.2$  (20%);

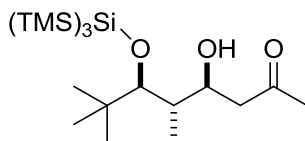

### 22c

$^{13}\text{C}$  NMR (500 MHz,  $\text{CDCl}_3$ )  $\delta = 209.1, 89.6, 70.6, 49.1, 42.0, 37.5, 31.4, 27.1, 17.8, 1.5$ ;  $^1\text{H}$  NMR (500 MHz,  $\text{CDCl}_3$ )  $\delta = 4.01$  (tt,  $J=8.9, 2.7$  Hz, 1 H), 3.54 (s, 1 H), 3.30 (d,  $J=4.0$  Hz, 1 H), 2.61 (dd,  $J=15.1, 2.3$  Hz, 1 H), 2.42 (dd,  $J=15.3, 8.9$  Hz, 1 H), 2.19 (s, 3 H), 1.76 (dq,  $J=10.3, 6.9, 6.9, 6.9, 3.7$  Hz, 1 H), 0.90 (s, 9 H), 0.88 (d,  $J=7.0$  Hz, 3 H), 0.23 (s, 27 H);  $\text{C}_{20}\text{H}_{49}\text{O}_3\text{Si}_4^+ [\text{M} + \text{H}]^+ m/z = 449.3$ ;  $\text{C}_{20}\text{H}_{47}\text{O}_2\text{Si}_4^+ [\text{M} - \text{OH}]^+ m/z = 431.3$  (85%)

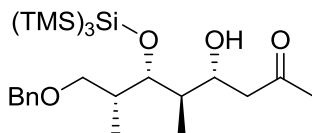

### 22d

TLC:  $R_f = 0.17$  (10:90 EtOAc/hexanes),  $^{13}\text{C}$  NMR (500 MHz,  $\text{CDCl}_3$ )  $\delta = 209.09, 137.86, 128.55, 128.00, 127.88, 76.56, 75.10, 73.5, 70.38, 48.87, 44.93, 35.04, 31.04, 13.16, 11.58, 0.83$ ;  $^1\text{H}$  NMR (500 MHz,  $\text{CDCl}_3$ )  $\delta = 7.28 - 7.41$  (m, 5 H), 4.58 (d,  $J=11.3$  Hz, 1 H), 4.49 (d,  $J=11.6$  Hz, 1 H), 3.88 - 3.97 (m, 2 H), 3.61 (dd,  $J=3.1, 1.2$  Hz, 1 H), 3.41 (t,  $J=8.2$  Hz, 1 H), 3.36 (dd,  $J=8.9, 5.5$  Hz, 1 H), 2.60 (dt,  $J=15.6, 0.9$  Hz, 1 H), 2.52 (dd,  $J=15.9, 9.5$  Hz, 1 H), 2.21 (s, 3 H), 2.05 (m,  $J=7.0$  Hz, 1 H), 1.72 - 1.81 (m, 1 H), 0.90 (d,  $J=6.7$  Hz, 3 H), 0.83 (d,  $J=6.7$  Hz, 3 H), 0.24 (s, 27 H); FTIR (thin film): 3485 (br), 2948, 2893, 1713, 1380, 1244, 1105, 1030, 837, 744, 687, 511; HMRS-TOF:

$C_{26}H_{51}O_3Si_4^+$   $[M-OH]^+$   $m/z = 523.2900$  (calc.: 523.2915, 3ppm),  $C_{26}H_{53}O_4Si_4^+$   $[M+H]^+$   
 $m/z = 541.3003$  (calc.: 541.3020, 3ppm) colorless oil.

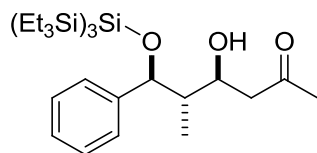

### 22f

<sup>13</sup>C NMR (500 MHz, CDCl<sub>3</sub>)  $\delta = 210.6, 140.9, 128.0, 127.3, 126.9, 78.3, 69.3, 47.7, 45.3, 30.9, 9.4, 9.0, 5.4$ ; <sup>1</sup>H NMR (500 MHz, CDCl<sub>3</sub>)  $\delta = 7.30$  (dd,  $J=8.2, 0.9$  Hz, 2 H), 7.24 (td,  $J=7.6, 0.6$  Hz, 2 H), 7.18 (tt,  $J=7.0, 1.2$  Hz, 1 H), 4.91 (d,  $J=4.0$  Hz, 1 H), 3.30 - 3.39 (m, 2 H), 2.56 (dd,  $J=17.4, 2.1$  Hz, 1 H), 2.42 (dd,  $J=17.9, 8.7$  Hz, 1 H), 2.11 (s, 3 H), 1.97 (dq,  $J=10.5, 6.7, 6.7, 6.7, 3.1$  Hz, 1 H), 0.99 (t,  $J=7.9$  Hz, 27 H), 0.70 (q,  $J=7.9$  Hz, 18 H), 0.61 (d,  $J=6.7$  Hz, 3 H);

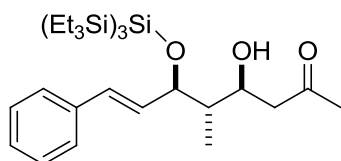

### 22h

<sup>13</sup>C NMR (500 MHz, CDCl<sub>3</sub>)  $\delta = 210.5, 137.2, 131.3, 129.8, 128.6, 127.4, 126.4, 77.8, 69.7, 47.9, 45.2, 30.9, 9.4, 8.9, 5.5$ ; <sup>1</sup>H NMR (500 MHz, CDCl<sub>3</sub>)  $\delta = 7.36$  (dd,  $J=8.5, 1.2$  Hz, 2 H), 7.31 (t,  $J=7.6$  Hz, 2 H), 7.22 (m,  $J=7.3, 7.3, 7.3, 1.2, 1.2$  Hz, 1 H), 6.52 (d,  $J=16.2$  Hz, 1 H), 6.07 (dd,  $J=16.2, 7.0$  Hz, 1 H), 4.44 (ddd,  $J=7.0, 4.3, 0.9$  Hz, 1 H), 3.69 (tdd,  $J=9.5, 9.5, 3.7, 2.4$  Hz, 1 H), 3.20 (d,  $J=4.0$  Hz, 1 H), 2.70 (dd,  $J=17.7, 2.1$  Hz, 1 H), 2.48 (dd,  $J=17.7, 9.5$  Hz, 1 H), 2.16 (s, 3 H), 1.80 - 1.93 (m, 1 H), 1.03 (t,  $J=7.9$  Hz, 27 H), 0.78 (m,  $J=7.6, 7.6, 7.6$  Hz, 18 H); LRMS (API-ES+)  $C_{33}H_{64}NaO_3Si_4^+$   $[M+Na]^+$   $m/z = 643.2$  (20%)

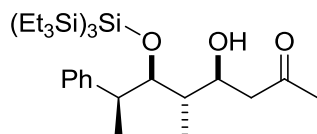

**22i** Me<sub>2</sub>AlNTf<sub>2</sub> (0.5 mol%) used as a catalyst for the first aldol, rather than HNTf<sub>2</sub>.

<sup>13</sup>C NMR (500 MHz, CDCl<sub>3</sub>)  $\delta = 209.56, 145.60, 128.42, 128.16, 126.55, 79.25, 69.06, 49.04, 45.05, 42.76, 30.56, 21.05, 11.20, 9.19, 5.81$ ; <sup>1</sup>H NMR (500 MHz, CDCl<sub>3</sub>)  $\delta = 7.18 - 7.38$  (m, 7 H), 4.06 (dd,  $J=8.2, 2.7$  Hz, 1 H), 2.76 - 2.87 (m, 2 H), 2.47 (dd,  $J=16.8, 1.8$  Hz, 1 H), 2.17 - 2.27 (m, 2 H), 2.03 (s, 3 H), 1.74 (quint,  $J=7.0, 7.0, 7.0, 7.0, 2.7, 2.7$  Hz, 1 H), 1.32 (d,  $J=7.0$  Hz, 3 H), 1.08 - 1.17 (m, 27 H), 0.85 (q,  $J=7.9$  Hz, 21 H); LRMS (API-ES):  $C_{33}H_{66}NaO_3Si_4^+$   $[M+Na]^+$   $m/z = 645.3$  (100%);  $C_{33}H_{65}O_2Si_4^+$   $[M-OH]^+$   $m/z = 605.5$  (95%)



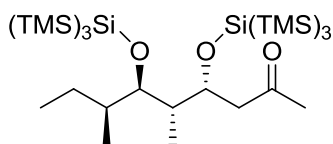

**20a**

$^1\text{H}$  NMR (500 MHz,  $\text{CDCl}_3$ )  $\delta$  = 3.84 (dt,  $J$ =8.8, 3.5 Hz, 1 H), 3.32 (m,  $J$ =4.9, 1.2 Hz, 1 H), 2.74 (dd,  $J$ =17.1, 8.5 Hz, 1 H), 2.61 (dd,  $J$ =17.1, 3.1 Hz, 1 H), 2.13 (s, 3 H), 1.59 - 1.66 (m, 1 H), 1.51 - 1.59 (m, 1 H), 1.25 - 1.34 (m, 1 H), 1.16 - 1.25 (m, 1 H), 0.90 (d,  $J$ =7.0 Hz, 3 H), 0.87 (t,  $J$ =7.0 Hz, 3 H), 0.80 (d,  $J$ =6.7 Hz, 3 H), 0.19 (s, 27 H), 0.17 - 0.19 (m, 27 H);  $^{13}\text{C}$  NMR (500 MHz,  $\text{CDCl}_3$ )  $\delta$  = 205.9, 81.5, 72.7, 50.29, 46.03, 37.3, 31.2, 30.1, 14.5, 12.4, 9.5, 0.94, 0.91; FTIR (thin film): 2949, 2893, 1718, 1243, 1018.4, 835; LRMS (APCI+)  $\text{C}_{20}\text{H}_{45}\text{O}_2\text{Si}_4$   $[\text{M}-\text{OSiTMS}_3]^+$   $m/z$  = 431 (35%).

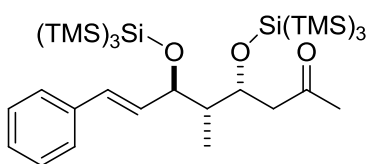

**20b**

$^{13}\text{C}$  NMR (500 MHz,  $\text{CDCl}_3$ )  $\delta$  = 206.7, 140.0, 131.2, 130.5, 128.6, 127.4, 126.8, 78.1, 74.4, 50.2, 47.0, 31.3, 10.9, 0.9, 0.7;  $^1\text{H}$  NMR (500 MHz,  $\text{CDCl}_3$ )  $\delta$  = 7.36 (dd,  $J$ =7.9, 1.2 Hz, 2 H), 7.30 (t,  $J$ =7.3 Hz, 2 H), 7.22 (tt,  $J$ =7.0, 1.2 Hz, 1 H), 6.49 (d,  $J$ =15.9 Hz, 1 H), 6.18 (dd,  $J$ =15.9, 6.4 Hz, 1 H), 4.02 (ddd,  $J$ =6.1, 4.6, 1.2 Hz, 1 H), 3.83 (td,  $J$ =6.5, 4.1 Hz, 1 H), 2.78 (dd,  $J$ =16.5, 6.7 Hz, 1 H), 2.70 (dd,  $J$ =16.5, 4.0 Hz, 1 H), 2.16 (s, 3 H), 1.79 - 1.88 (m, 0 H), 0.86 (d,  $J$ =6.7 Hz, 3 H), 0.18 (s, 27 H), 0.17 (s, 27 H); LRMS (API-ES -)  $\text{C}_{30}\text{H}_{63}\text{O}_3\text{Si}_7$   $[\text{M} - \text{TMS}]^-$   $m/z$  = 667.2 (100%). FTIR (thin film): 3032, 2950, 2895, 1297, 1868, 1718, 1653, 1496, 1396, 1360, 1245, 1048, 836, 689. Waxy solid.

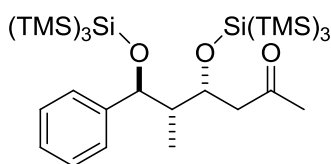

**20c**

Compound previously described, and stereochemical determination previously established.<sup>13</sup>

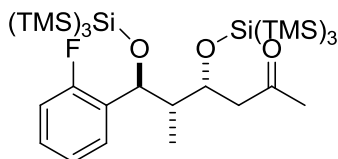

**20d**

$^{13}\text{C}$  NMR (500 MHz,  $\text{CDCl}_3$ )  $\delta$  = 159.89 (d,  $J$ =242.3 Hz), 130.18 (d,  $J$ =4.5 Hz), 129.39 (d,  $J$ =13.5 Hz), 128.98 (d,  $J$ =8.5 Hz), 124.17 (d,  $J$ =3.0 Hz), 115.16 (d,  $J$ =23.4 Hz), 73.29, 71.93, 49.52, 47.02, 31.53, 10.40, 0.87, 0.49;  $^1\text{H}$  NMR (500 MHz,  $\text{CDCl}_3$ )  $\delta$  = 7.36 (td,  $J$ =7.5, 1.5 Hz, 1 H), 7.20 (tdd,  $J$ =7.3, 7.3, 5.5, 1.8 Hz, 1 H), 7.12 (t,  $J$ =7.3 Hz, 1 H), 6.95 (dd,  $J$ =9.9, 8.7 Hz, 1 H), 4.79 (d,  $J$ =4.9 Hz, 1 H), 3.45 (quind,  $J$ =4.9, 4.9, 4.9, 4.9, 0.9 Hz,

1 H), 2.79 (dd,  $J=16.2, 5.5$  Hz, 1 H), 2.74 (dd,  $J=15.9, 4.3$  Hz, 1 H), 2.16 (s, 3 H), 2.01 - 2.11 (m, 1 H), 0.79 (d,  $J=7.0$  Hz, 3 H), 0.08 (s, 54H);  $^{19}\text{F}$  NMR (500MHz,  $\text{CDCl}_3$ , 295K,  $\text{C}_6\text{H}_5\text{CF}_3$  external std.,  $\delta = -63.72$ )  $\delta = -119.41$ ; LRMS (API-ES +):  $\text{C}_{31}\text{H}_{70}\text{FO}_3\text{Si}_8^+$   $[\text{M}+\text{H}]^+$   $m/z = 733.3$  (18%),  $\text{C}_{22}\text{H}_{42}\text{FO}_2\text{Si}_4$   $[\text{M} - \text{TMS}_3\text{SiO}]^+$   $m/z = 469.2$  (100%); LRMS (API-ES -)  $\text{C}_{28}\text{H}_{60}\text{FO}_3\text{Si}_7^-$   $[\text{M} - \text{TMS}]^-$   $m/z = 659.3$  (100%); FTIR (thin film): 2949, 2894, 2071, 1925, 1863, 1727, 1704, 1615, 1585, 1458, 1367, 1244, 1046, 834, 687, 624; white solid.

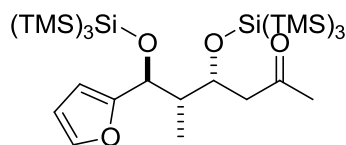

### 20e

$^{13}\text{C}$  NMR (500 MHz,  $\text{CDCl}_3$ )  $\delta = 207.21, 155.37, 141.25, 110.51, 108.51, 74.67, 72.33, 48.96, 46.13, 31.65, 10.84, 0.91, 0.43$ ;  $^1\text{H}$  NMR (500 MHz,  $\text{CDCl}_3$ )  $\delta = 7.30$  (t,  $J=0.9$  Hz, 1 H), 6.32 (dd,  $J=3.1, 1.8$  Hz, 1 H), 6.17 (d,  $J=2.7$  Hz, 1 H), 4.53 (d,  $J=4.9$  Hz, 1 H), 3.38 (tdd,  $J=5.2, 5.2, 4.3, 3.7$  Hz, 1 H), 2.65 (dd,  $J=15.3, 3.7$  Hz, 2 H), 2.57 (dd,  $J=15.6, 5.2$  Hz, 2 H), 2.15 (s, 3 H), 1.97 - 2.06 (m, 1 H), 0.84 (d,  $J=6.7$  Hz, 3 H), 0.14 (s, 27 H), 0.11 (s, 27 H); LRMS (API-ES +):  $\text{C}_{29}\text{H}_{68}\text{NaO}_4\text{Si}_8^+$   $[\text{M}+\text{Na}]^+$   $m/z = 727.3$  (5%); LRMS (API-ES -):  $\text{C}_{26}\text{H}_{59}\text{O}_4\text{Si}_7^-$   $[\text{M} - \text{TMS}]^-$   $m/z = 631.2$  (100%); FTIR (thin film): 2949, 2894, 1720, 1705, 1245, 1051, 835, 687, 624; white solid.

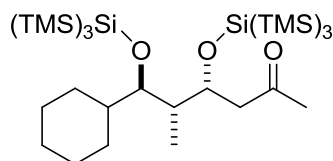

### 20f

$^{13}\text{C}$  NMR (500 MHz,  $\text{CDCl}_3$ )  $\delta = 205.8, 82.0, 73.8, 51.1, 47.0, 40.6, 33.1, 31.1, 28.2, 26.8, 26.5, 26.4, 11.8, 1.00, 0.98$ ;  $^1\text{H}$  NMR (500 MHz,  $\text{CDCl}_3$ )  $\delta = 3.82$  (td,  $J=7.0, 3.4$  Hz, 1 H), 3.11 (dd,  $J=4.3, 1.8$  Hz, 1 H), 2.75 (dd,  $J=17.2, 7.2$  Hz, 1 H), 2.59 (dd,  $J=17.4, 3.4$  Hz, 1 H), 2.13 (s, 3 H), 1.56 - 1.73 (m, 6 H), 1.34 - 1.51 (m, 2 H), 1.15 - 1.32 (m, 5 H), 1.01 - 1.12 (m, 1 H), 0.94 (d,  $J=7.0$  Hz, 3 H), 0.20 (s, 27 H), 0.19 (s, 27 H); LRMS (APCI+),  $\text{C}_{31}\text{H}_{76}\text{O}_3\text{Si}_8^+$   $[\text{M}+\text{H}]^+$   $m/z = 721.3$  (15%),  $\text{C}_{22}\text{H}_{49}\text{O}_2\text{Si}_4^+$   $[\text{M} - \text{TMS}_3\text{SiO}]^+$   $m/z = 457.2$  (100%); LRMS (API-ES -)  $\text{C}_{28}\text{H}_{67}\text{O}_3\text{Si}_7^-$   $[\text{M} - \text{TMS}]^-$   $m/z = 647.2$  (100%); FTIR (thin film): 2949, 2895, 1721, 1450, 1361, 1244, 1050, 835, 687; waxy solid

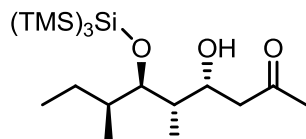

(21a) TLC:  $R_f = 0.16$  (10:90 EtOAc/hexanes);  $^{13}\text{C}$  NMR (500 MHz,  $\text{CDCl}_3$ )  $\delta = 208.56, 87.68, 67.87, 48.84, 40.73, 37.67, 30.97, 24.10, 15.90, 13.28, 12.47, 1.00, 0.99$ ;  $^1\text{H}$  NMR (500 MHz,  $\text{CDCl}_3$ )  $\delta = 4.46$  (tt,  $J=6.4, 1.8$  Hz, 1 H), 3.42 (s, 1 H), 3.35 (dd,  $J=4.3, 2.7$  Hz, 1 H), 2.66 (dd,  $J=16.5, 7.9$  Hz, 1 H), 2.40 (dd,  $J=16.5, 5.2$  Hz, 1 H), 2.16 (s, 3 H),

1.69 - 1.76 (m, 1 H), 1.61 - 1.69 (m, 3 H), 1.13 - 1.23 (m, 1 H), 0.99 (d,  $J=7.3$  Hz, 3 H), 0.91 (m,  $J=7.3$ , 7.3 Hz, 2 H), 0.88 (d,  $J=7.0$  Hz, 3 H), 0.21 (s, 27 H); LRMS (APCI+):  $C_{20}H_{49}O_3Si_4^+ [M+H]^+ m/z = 449.2$  (100%);  $C_{20}H_{47}O_2Si_4^+ [M - OH]^+ m/z = 431.2$  (65%).

### Stereochemical assignment for compounds 20, 21, 22

The stereochemistry of 20a was determined to be 3,5-*anti* by conversion to SI-7 (Scheme S-10). Compounds 20b, 20c, 20d, 20e, and 20f were assigned by analogy. The stereochemistry of compound 21a was determined by conversion to 20a (Scheme S-11). The stereochemistry of 22a was assigned 3,4-*anti* by contrast to 21a. The stereochemistry of 22f was determined by conversion to SI-8 (Scheme S-8). 3,5-*syn* stereochemistry was established by  $^{13}C$  NMR resonances of  $\delta = 23.3, 19.5, 98.7$  ppm.

### Scheme S-14

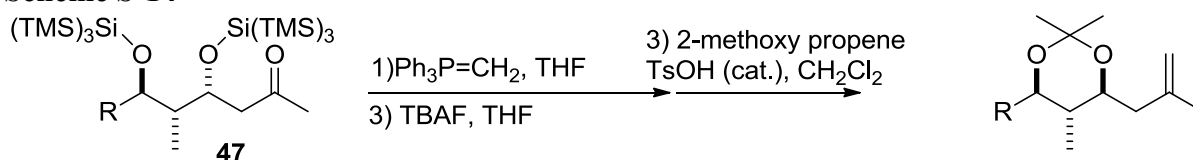

### Scheme S-15

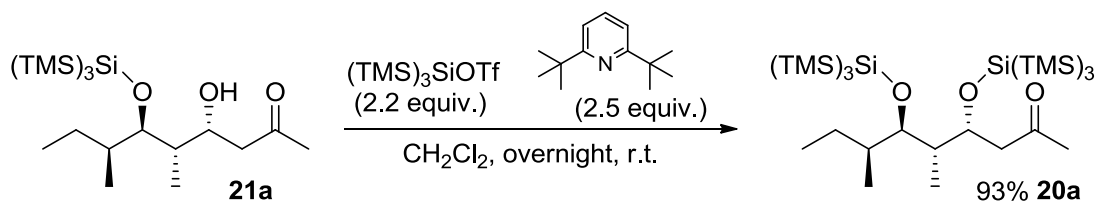

### Scheme S-16

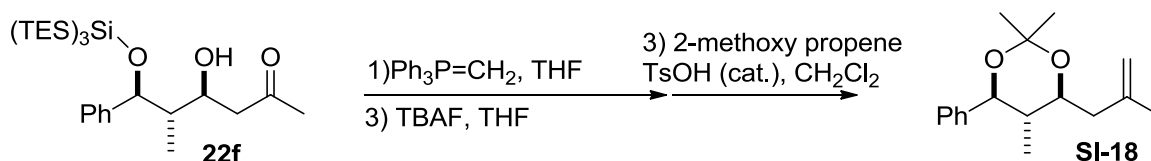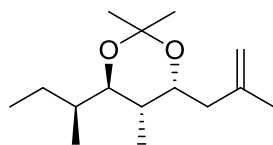

SI-17 Data for SI-7: TLC:  $R_f = 0.34$  (5:95 EtOAc/hexanes);  $^1H$  NMR (500 MHz,  $CDCl_3$ )  $\delta = 4.73 - 4.82$  (m, 2 H), 3.97 (dt,  $J=8.5, 4.9$  Hz, 1 H), 3.18 (dd,  $J=7.3, 3.4$  Hz, 1 H), 2.17 (dd,  $J=14.6, 8.9$  Hz, 1 H), 2.06 (dd,  $J=14.6, 4.9$  Hz, 1 H), 1.74 - 1.79 (m, 1 H), 1.76 (s, 1 H), 1.37 - 1.52 (m, 2 H), 1.31 - 1.32 (m, 3 H), 1.31 (s, 3 H), 1.18 - 1.28 (m, 1 H), 0.90 (d,  $J=6.7$  Hz, 3 H), 0.90 (t,  $J=7.3$  Hz, 3 H), 0.84 (d,  $J=6.7$  Hz, 3 H);  $^{13}C$  NMR (500 MHz,  $CDCl_3$ )  $\delta = 143.2, 111.8, 100.3, 77.3, 67.9, 39.1, 38.2, 36.8, 26.3, 25.6, 23.8, 23.2, 14.0, 12.5, 12.2$ ; LRMS (APCI+)  $C_{15}H_{29}O_2 [M+H]^+ m/z = 241.2$  (45%); FTIR (thin film) = 2964, 2935, 2877, 1653, 1437, 1379, 1227, 1172, 1021, 888.

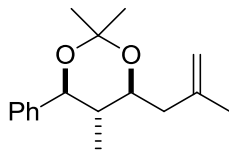

**SI-18**

$^{13}\text{C}$  NMR (500 MHz,  $\text{CDCl}_3$ )  $\delta$  = 143.2, 140.9, 128.4, 128.1, 127.9, 112.2, 98.7, 78.7, 73.7, 41.5, 40.4, 30.4, 23.3, 19.5, 12.6;  $^1\text{H}$  NMR (500 MHz,  $\text{CDCl}_3$ )  $\delta$  = 7.32 - 7.41 (m, 4 H), 7.25 - 7.31 (m, 1 H), 4.79 (d,  $J=18.6$  Hz, 1 H), 4.43 (d,  $J=10.1$  Hz, 1 H), 3.83 (ddd,  $J=11.3, 8.5, 2.7$  Hz, 1 H), 2.39 (d,  $J=15.0$  Hz, 1 H), 2.17 (dd,  $J=14.6, 8.5$  Hz, 1 H), 1.81 (d,  $J=0.6$  Hz, 3 H), 1.59 - 1.68 (m, 1 H), 1.56 (s, 3 H), 1.47 (s, 3 H), 0.66 (d,  $J=6.4$  Hz, 3 H);

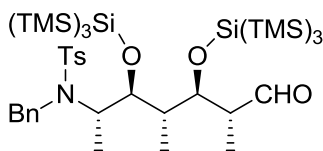

**25** Known compound<sup>13</sup> Stereochemistry previously determined.

**Data for 25:** TLC: (EtOAc:hexanes, 10:90),  $R_f$  = 0.63;  $^1\text{H}$  NMR (500MHz,  $\text{CDCl}_3$ )  $\delta$  = 9.99 (s, 1 H), 7.08 - 7.16 (m, 5 H), 7.02 - 7.07 (m, 2 H), 6.90 - 6.97 (m, 2 H), 5.07 (dd,  $J=10.3, 2.4$  Hz, 1 H), 4.79 (d,  $J=15.4$  Hz, 1 H), 4.48 (qd,  $J=7.1, 1.5$  Hz, 1 H), 4.43 (d,  $J=15.4$  Hz, 1 H), 3.94 (dd,  $J=4.6, 1.7$  Hz, 1 H), 2.85 (qd,  $J=6.7, 2.4$  Hz, 1 H), 2.30 (s, 3 H), 2.06 (m,  $J=10.4, 7.4, 4.6$  Hz, 1 H), 1.36 (d,  $J=7.0$  Hz, 3 H), 1.16 (d,  $J=6.8$  Hz, 3 H), 1.00 (d,  $J=7.6$  Hz, 3 H), 0.30 (s, 27 H), 0.18 (s, 27 H);  $^{13}\text{C}$  NMR (500MHz,  $\text{CDCl}_3$ )  $\delta$  = 202.7, 142.1, 139.8, 136.5, 130.2, 129.1, 128.9, 128.0, 127.1, 127.0, 81.1, 75.3, 53.9, 53.3, 51.0, 42.7, 21.4, 20.2, 10.2, 7.6, 1.5, 1.3; LRMS (APCI+)  $\text{C}_{41}\text{H}_{85}\text{NO}_5\text{SSi}_8^+$  [M+H]<sup>+</sup>  $m/z$  = 926.7 (8%),  $\text{C}_{29}\text{H}_{50}\text{NO}_3\text{SSi}_4^+$  [M - TMS<sub>3</sub>SiOH - CH<sub>3</sub>CH<sub>2</sub>CHO]<sup>+</sup>  $m/z$  = 604 (100%). FTIR (thin film): 2949, 2893, 1724, 1684, 1653, 1339, 1244, 1166, 1091, 1022, 836, 688.  $[\alpha]_D^{25} = +7.72^\circ$  ( $c, 1.00, \text{CH}_2\text{Cl}_2$ ).

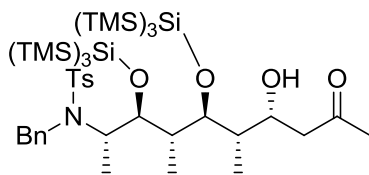

**26a** :

**Data for 26a:** TLC:  $R_f$  = 0.33 (10:90 acetone/hexanes);  $^1\text{H}$  NMR (500MHz,  $\text{CDCl}_3$ )  $\delta$  = 7.12 (s, 7 H), 6.97 (d,  $J=8.2$  Hz, 2 H), 4.73 (d,  $J=15.3$  Hz, 1 H), 4.41 (d,  $J=15.3$  Hz, 1 H), 4.39 (q,  $J=7.3$  Hz, 1 H), 4.31 (dd,  $J=10.1, 1.2$  Hz, 1 H), 4.12 (t,  $J=9.9$  Hz, 1 H), 3.91 (dd,  $J=4.6, 0.9$  Hz, 1 H), 3.66 (d,  $J=18.0$  Hz, 1 H), 3.39 (d,  $J=2.4$  Hz, 1 H), 2.50 (dd,  $J=18.2, 10.5$  Hz, 1 H), 2.32 (s, 3 H), 2.17 (s, 3 H), 2.06 (s, 1 H), 1.95 - 2.02 (m, 1 H), 1.60 - 1.76 (m, 1 H), 1.44 - 1.58 (m, 2 H), 1.31 (d,  $J=7.0$  Hz, 3 H), 1.14 (d,  $J=6.7$  Hz, 3 H), 1.14 (d,  $J=7.3$  Hz, 3 H), 0.31 (s, 27 H), 0.16 (s, 27 H);  $^{13}\text{C}$  NMR (500MHz,  $\text{CDCl}_3$ )  $\delta$  = 211.5, 142.1, 138.8, 136.1, 129.8, 128.8, 127.9, 126.9, 126.8, 81.1, 75.7, 70.5, 52.9, 50.9, 48.2, 46.3, 41.9, 34.8, 30.8, 27.4, 22.7, 21.4, 20.0, 12.0, 10.0, 1.7, 1.2; FTIR (thin film): 3545,

2948, 2894, 1711, 1652, 1599, 1332, 1245, 1165, 1026, 835, 690; LRMS (APCI+)  
 $C_{44}H_{89}NNaO_6SSi_8^+ [M+Na]^+ m/z = 1006.3$  (35%).

**Stereochemical Assignment:** Stereochemistry confirmed by conversion to **SI-9** (TMSCl,  $Et_3N$ ,  $CH_2Cl_2$ , DMAP (cat)), which was analyzed by single crystal X-ray diffraction analysis. Crystallographic information file can be obtained at CCDC # 936272 See below for details.

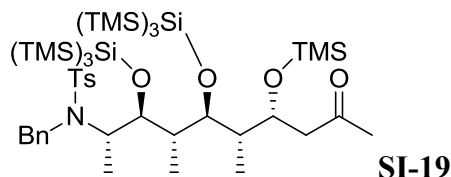

**Data for SI-19** TLC:  $R_f = 0.36$  (10:90 EtOAc/hexanes); recrystallized by slow evaporation from  $Et_2O$ , mp = 217–219 °C;  $^1H$  NMR (500MHz,  $CDCl_3$ )  $\delta = 7.02 - 7.17$  (m, 7 H), 6.95 (d,  $J=8.2$  Hz, 2 H), 4.68 (d,  $J=15.3$  Hz, 1 H), 4.40 (d,  $J=15.3$  Hz, 1 H), 4.35 (q,  $J=7.0$  Hz, 1 H), 4.26 - 4.32 (m, 2 H), 3.88 (d,  $J=4.6$  Hz, 1 H), 3.42 (d,  $J=17.1$  Hz, 1 H), 2.62 (dd,  $J=17.2, 9.6$  Hz, 1 H), 2.30 (s, 3 H), 2.11 (s, 3 H), 1.95 - 2.06 (m, 2 H), 1.27 (d,  $J=6.7$  Hz, 3 H), 1.09 (d,  $J=7.3$  Hz, 3 H), 1.05 (d,  $J=6.7$  Hz, 3 H), 0.30 (s, 27 H), 0.16 (s, 27 H), 0.10 (s, 9 H);  $^{13}C$  NMR (500MHz,  $CDCl_3$ )  $\delta = 207.7, 142.1, 138.8, 136.4, 129.8, 128.9, 127.9, 127.0, 126.9, 81.3, 76.3, 72.2, 52.8, 50.9, 49.8, 47.7, 41.8, 31.1, 21.5, 20.0, 13.3, 10.0, 1.8, 1.3, 0.8$ ; FTIR: 2950, 2895, 1722, 1457, 1334, 1246, 11163, 1111, 1027, 835, 689. LRMS (APCI+)  $C_{38}H_{69}NO_5SSi_5^+ [M - (TMS_3SiOH)_2]^+ m/z = 790.3$  (100%).

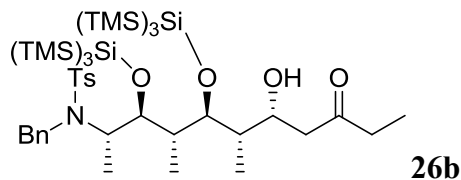

Prepared according to TLC:  $R_f = 0.38$  (10:90 EtOAc/hexanes);  $^1H$  NMR (500 MHz,  $CDCl_3$ )  $\delta = 4.71$  (d,  $J=15.3$  Hz, 1 H), 4.41 (d,  $J=15.1$  Hz, 1 H), 4.37 (q,  $J=6.6$  Hz, 1 H), 4.30 (d,  $J=10.2$  Hz, 1 H), 4.12 (t,  $J=9.9$  Hz, 1 H), 3.91 (d,  $J=4.4$  Hz, 1 H), 3.62 (d,  $J=17.9$  Hz, 1 H), 3.55 (s, 1 H), 2.39 - 2.58 (m, 3 H), 2.32 (s, 3 H), 2.03 - 2.11 (m, 1 H), 1.95 - 2.02 (m, 1 H), 1.29 (d,  $J=7.0$  Hz, 3 H), 1.14 (t,  $J=6.0$  Hz, 6 H), 1.00 (td,  $J=7.3, 1.0$  Hz, 3 H), 0.30 (s, 27 H), 0.16 (s, 27 H);  $^{13}C$  NMR (500 MHz,  $CDCl_3$ )  $\delta = 214.3, 142.1, 138.9, 136.3, 129.8, 128.9, 127.9, 127.0, 126.9, 81.2, 75.8, 70.7, 52.9, 51.0, 47.0, 46.6, 42.0, 36.8, 21.4, 20.2, 12.2, 10.1, 7.6, 1.8, 1.3$ ; LRMS (API-ES +):  $C_{36}H_{63}NO_5SSi_4^+ [M - Si(TMS)_3]^+ m/z = 734.3$  (36%),  $C_{45}H_{91}NO_6NaSSi_4^+ [M+Na]^+ m/z = 1020.5$  (5%); FTIR (thin film): 3545, 2950, 2895, 1702, 1675, 1624, 1457, 1335, 1245, 1154, 1031, 835, 690, 654, 547.

**Synthetic procedures and Data for 27a, 28, 31, 32, 33, 34**

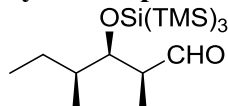

## 27a

Known compound.<sup>7</sup> Stereochemistry previously determined.

<sup>1</sup>H NMR (500 MHz, CDCl<sub>3</sub>) δ = 9.82 (s, 1 H), 3.65 - 3.73 (m, 1 H), 2.46 - 2.54 (m, 1 H), 1.45 - 1.58 (m, 2 H), 1.06 - 1.19 (m, 2 H), 1.04 (d, *J*=7.0 Hz, 3 H), 0.88 (t, *J*=7.2 Hz, 6 H), 0.78 (d, *J*=6.7 Hz, 3 H), 0.19 (s, 27 H); <sup>13</sup>C NMR (500 MHz, CDCl<sub>3</sub>) δ = 205.1, 80.9, 50.4, 39.5, 26.1, 14.6, 12.5, 10.2, 0.8; LRMS (APCI+) C<sub>9</sub>H<sub>28</sub>OSi<sub>4</sub>Na<sup>+</sup> [TMS<sub>3</sub>SiOHNa]<sup>+</sup> *m/z* = 288.1 (100%), C<sub>17</sub>H<sub>43</sub>O<sub>2</sub>Si<sub>4</sub><sup>+</sup> [M+H]<sup>+</sup> *m/z* = 391.2 (30%); 2961, 2893, 1724, 1459, 1425, 1245, 1023, 834, 756, 687, 624; [α]<sub>D</sub><sup>21</sup> = +33.97° (*c* 0.37, CH<sub>2</sub>Cl<sub>2</sub>).

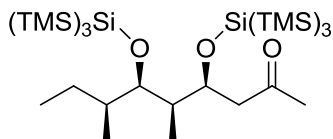

**28a** Prepared according to **GP2**, using Me<sub>2</sub>AlNTf<sub>2</sub> as a catalyst instead of HNTf<sub>2</sub> (Table 3, entry 1). **28a**: TLC: R<sub>f</sub> = 0.39 (25:75 CH<sub>2</sub>Cl<sub>2</sub>/hexanes); <sup>1</sup>H NMR (500 MHz, CDCl<sub>3</sub>) δ = 4.01 (dt, *J*=9.4, 3.0 Hz, 1 H), 3.28 (dd, *J*=6.8, 1.7 Hz, 1 H), 2.77 (dd, *J*=16.4, 9.6 Hz, 1 H), 2.55 (dd, *J*=16.4, 3.5 Hz, 1 H), 2.13 (s, 3 H), 1.47 - 1.53 (m, 1 H), 1.37 - 1.46 (m, 1 H), 1.20 - 1.32 (m, 2 H), 0.90 (t, *J*=7.3 Hz, 3 H), 0.86 (d, *J*=6.7 Hz, 3 H), 0.82 (d, *J*=6.8 Hz, 3 H), 0.19 (s, 27 H), 0.17 - 0.18 (m, 27 H); <sup>13</sup>C NMR (500 MHz, CDCl<sub>3</sub>) δ = 206.6, 82.9, 72.3, 48.6, 41.4, 38.3, 31.3, 27.1, 12.2, 12.0, 11.9, 1.3, 0.7; FTIR (thin film): 2949, 2894, 1718, 1244, 1015, 835, 744; LRMS (APCI+) C<sub>20</sub>H<sub>45</sub>O<sub>2</sub>Si<sub>4</sub> [M-OSiTMS<sub>3</sub>]<sup>+</sup> *m/z* = 431 (35%).

**Stereochemical Assignment:** Stereochemistry at position C(3) of **28a** was determined to be (*S*) by conversion to 1,3-diol acetone **SI-20** (**Scheme S-13**) following **GP 6** (steps 2-4). 3,5-*syn* stereochemistry was indicated by <sup>13</sup>C NMR analysis (δ = 99.0, 19.7, 30.2 ppm).

## Scheme S-17

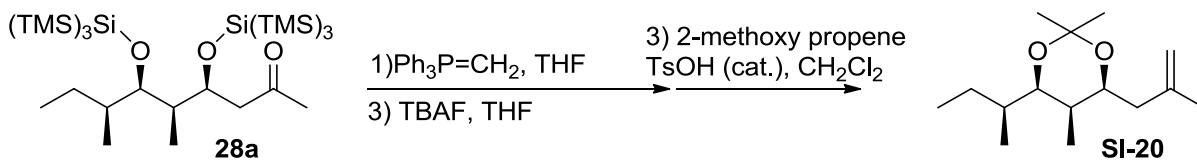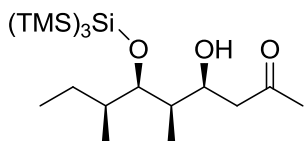

**29a** TLC: R<sub>f</sub> = 0.17 (10:90 EtOAc/hexanes); <sup>1</sup>H NMR (500 MHz, CDCl<sub>3</sub>) δ = 4.06 (dq, *J*=7.5, 3.8 Hz, 1 H), 3.36 (t, *J*=3.2 Hz, 1 H), 2.77 (d, *J*=3.1 Hz, 1 H), 2.58 (m, *J*=2.4 Hz, 2 H), 2.17 (s, 3 H), 1.52 - 1.63 (m, 4 H), 0.99 - 1.11 (m, 1 H), 0.88 (m, *J*=7.5, 7.5 Hz, 4 H), 0.88 (d, *J*=7.0 Hz, 3 H), 0.84 (d, *J*=7.0 Hz, 3 H), 0.20 (s, 27 H); <sup>13</sup>C NMR (500 MHz, CDCl<sub>3</sub>) δ = 210.0, 82.6, 69.6, 48.7, 40.3, 39.9, 31.0, 25.1, 15.2, 12.4, 10.7, 1.0; LRMS (APCI+) C<sub>20</sub>H<sub>48</sub>NaO<sub>3</sub>Si<sub>4</sub><sup>+</sup> [M + Na]<sup>+</sup> *m/z* = 417.2 (100%).

**Stereochemical Assignment:** **29a** was determined to be 3,4-*syn* by conversion to **SI-20**.

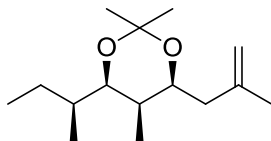

**Data for SI-20:**  $^1\text{H NMR}$  (500 MHz,  $\text{CDCl}_3$ )  $\delta$  = 4.79 (s, 2 H), 4.76 (s, 1 H), 4.01 (ddd,  $J$ =7.6, 5.8, 2.1 Hz, 1 H), 3.41 (dd,  $J$ =9.8, 1.8 Hz, 1 H), 2.23 (dd,  $J$ =14.3, 7.3 Hz, 1 H), 2.10 (dd,  $J$ =14.5, 6.0 Hz, 1 H), 1.75 (s, 3 H), 1.45 - 1.55 (m, 2 H), 1.41 (s, 3 H), 1.40 (s, 3 H), 0.92 (d,  $J$ =6.4 Hz, 7 H), 0.88 (t,  $J$ =6.4 Hz, 3 H), 0.84 (d,  $J$ =6.7 Hz, 3 H); TLC:  $R_f$  = 0.31 (5:95 EtOAc/hexanes);  $^{13}\text{C NMR}$  (500 MHz,  $\text{CDCl}_3$ )  $\delta$  = 142.7, 112.1, 99.0, 78.3, 72.1, 41.2, 35.5, 32.7, 30.2, 23.6, 23.1, 19.7, 15.6, 11.0, 4.9; FTIR (thin film): 2967, 2937, 1653, 1278, 1200, 1011, 836. LRMS (APCI +)  $\text{C}_{15}\text{H}_{32}\text{NO}_2^+$  [ $\text{M} + \text{NH}_4$ ] $^+$   $m/z$  = 258 (40%),  $\text{C}_{15}\text{H}_{27}\text{O}^+$  [ $\text{M}-\text{OH}$ ] $^+$   $m/z$  = 223 (35%);

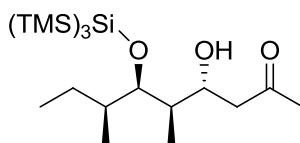

**30a:**

**General Procedure GP9** An oven-dried 1 dram vial was charged with a magnetic stir bar, **27a** (40mg, 0.1 mmol), acetone 0.4 mL, DMF (0.8 mL) and L-PTZ (2.6 mg, weighed on a microbalance, 0.02 mmol). The vial was sealed and stirred under air for 5 days. The reaction mixture was poured onto cold water (10 mL) and  $\text{NaHCO}_3$  (sat. aq., 1 mL) was added. The mixture was extracted with  $\text{CH}_2\text{Cl}_2$  (3 x 6 mL). The combined organic layers were washed with  $\text{H}_2\text{O}$  and brine (5 mL each), dried over  $\text{Na}_2\text{SO}_4$ , filtered through cotton and concentrated. Purification by flash chromatography (10 mL silica, 1-7% EtOAc/hexanes) afforded **30a** as a white semi-solid (32 mg, 71%).

**Data for 30a:** TLC:  $R_f$  = 0.23 (10:90 EtOAc/hexanes);  $^1\text{H NMR}$  (500 MHz,  $\text{CDCl}_3$ )  $\delta$  = 3.98 (tt,  $J$ =9.2, 2.4 Hz, 1 H), 3.89 - 3.94 (m, 1 H), 3.53 (d,  $J$ =5.5 Hz, 1 H), 2.57 (dd,  $J$ =15.9, 3.1 Hz, 1 H), 2.47 (dd,  $J$ =15.6, 8.9 Hz, 1 H), 2.20 (s, 3 H), 1.74 (dq,  $J$ =9.4, 7.0, 7.0, 2.1 Hz, 1 H), 1.45 - 1.57 (m, 2 H), 1.07 - 1.18 (m, 1 H), 0.92 (d,  $J$ =6.7 Hz, 3 H), 0.88 (t,  $J$ =7.5 Hz, 3 H), 0.76 (d,  $J$ =7.0 Hz, 3 H), 0.21 (s, 27 H);  $^{13}\text{C NMR}$  (500 MHz,  $\text{CDCl}_3$ )  $\delta$  = 209.7, 83.6, 71.0, 49.0, 41.8, 38.4, 31.5, 27.2, 15.7, 13.3, 12.4, 0.9; FTIR (thin film): 3534 (br), 2949, 2894, 1712, 1381, 1244, 1016, 836, 686, 624; LRMS (APCI +)  $\text{C}_{20}\text{H}_{48}\text{NaO}_3\text{Si}_4^+$  [ $\text{M} + \text{Na}$ ] $^+$   $m/z$  = 417.2 (100%).

**Stereochemical Assignment:** The stereochemistry of **30a** determined by conversion to acetone **SI-21** following **GP 6**. 3,5-*anti* stereochemistry was indicated by  $^{13}\text{C NMR}$  analysis ( $\delta$  = 100.8, 24.7, 24.9 ppm).

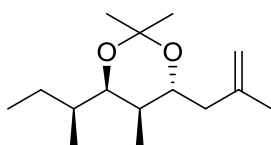

**Data for SI-21:** TLC:  $R_f = 0.37$  (5:95 EtOAc/hexanes);  $^1\text{H NMR}$  (500 MHz,  $\text{CDCl}_3$ )  $\delta = 4.74 - 4.81$  (m, 2 H), 3.37 - 3.42 (m, 1 H), 3.42 (dd,  $J=9.2, 4.3$  Hz, 1 H), 2.24 (dd,  $J=15.0, 8.5$  Hz, 1 H), 2.19 (dd,  $J=14.6, 4.3$  Hz, 1 H), 1.75 (s, 3 H), 1.71 (quind,  $J=6.9, 6.9, 6.9, 6.9, 4.6$  Hz, 1 H), 1.36 - 1.51 (m, 2 H), 1.34 (s, 3 H), 1.31 (s, 3 H), 0.93 - 0.98 (m, 0 H), 0.92 (d,  $J=6.4$  Hz, 3 H), 0.90 (t,  $J=6.7$  Hz, 3 H), 0.85 (d,  $J=6.7$  Hz, 3 H);  $^{13}\text{C NMR}$  (500 MHz,  $\text{CDCl}_3$ )  $\delta = 143.3, 112.0, 100.8, 73.8, 73.3, 43.1, 38.7, 34.3, 24.9, 24.7, 23.8, 23.0, 15.7, 12.1, 12.2$ ; LRMS (APCI+)  $\text{C}_{15}\text{H}_{29}\text{O}_2$   $[\text{M}+\text{H}]^+$   $m/z = 241.2$  (45%). FTIR (thin film) 2985, 2968, 2934, 2876, 1653, 1378, 1227, 1107, 996, 888.

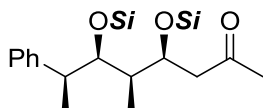

**28b** dr = 90:8:2

$^1\text{H NMR}$  (500MHz,  $\text{CDCl}_3$ , 294K)  $\delta = 7.27 - 7.33$  (m, 4 H), 7.19 - 7.25 (m, 1 H), 4.04 (dt,  $J=7.4, 4.7$  Hz, 1 H), 3.70 (dd,  $J=7.0, 2.4$  Hz, 1 H), 3.47 (dd,  $J=18.5, 4.7$  Hz, 1 H), 2.80 (quin,  $J=7.0$  Hz, 1 H), 2.53 (dd,  $J=18.6, 4.3$  Hz, 1 H), 2.09 (s, 3 H), 1.74 (dq,  $J=7.0, 6.8, 6.8, 6.8, 2.0$  Hz, 1 H), 1.28 (d,  $J=7.0$  Hz, 3 H), 0.34 (d,  $J=7.3$  Hz, 3 H), 0.30 (s, 27 H), 0.20 (s, 27 H);  $^{13}\text{C NMR}$  (500MHz,  $\text{CDCl}_3$ , 294K)  $\delta = 206.74, 144.21, 128.37, 128.36, 126.34, 83.29, 73.04, 51.02, 44.87, 43.11, 30.69, 20.25, 15.72, 1.28, 0.85$ ; LRMS (APCI+):  $\text{C}_{24}\text{H}_{47}\text{O}_2\text{Si}_4$   $[\text{M} - \text{TMS}_3\text{SiO}]^+$   $m/z = 479.2$  (100%); FTIR (thin film): 2949, 2894, 1926, 1868, 1720, 1680, 1453, 1365, 1245, 1067, 1031, 835, 687; waxy solid.

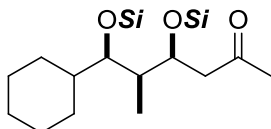

**29c**  $^1\text{H NMR}$  (500MHz,  $\text{CDCl}_3$ , 294K)  $\delta = 4.01$  (dt,  $J=8.6, 3.3$  Hz, 1 H), 3.27 (dd,  $J=5.5, 0.9$  Hz, 1 H), 2.81 (dd,  $J=16.8, 8.9$  Hz, 1 H), 2.54 (dd,  $J=16.9, 3.5$  Hz, 1 H), 2.13 (s, 3 H), 1.72 - 1.81 (m, 2 H), 1.63 - 1.69 (m, 1 H), 1.49 - 1.62 (m, 4 H), 1.19 - 1.31 (m, 4 H), 1.07 - 1.18 (m, 2 H), 0.83 (d,  $J=6.7$  Hz, 3 H), 0.20 (s, 27 H), 0.19 (s, 27 H);  $^{13}\text{C NMR}$  (500MHz,  $\text{CDCl}_3$ , 294K)  $\delta = 206.56, 81.59, 72.71, 48.71, 42.03, 41.08, 31.22, 29.58, 27.17, 26.67, 26.4, 12.07, 1.40, 0.81$ ; LRMS (APCI+):  $\text{C}_{22}\text{H}_{49}\text{O}_2\text{Si}_4$   $[\text{M} - \text{TMS}_3\text{SiO}]^+$   $m/z = 457.4$  (100%); LRMS (APCI-):  $\text{C}_{28}\text{H}_{67}\text{O}_3\text{Si}_7$   $[\text{M} - \text{TMS}]^-$   $m/z = 642.7$  (55%), FTIR (thin film): 2948m 2854, 1719, 1445, 1359, 1244, 1014, 834m 745, 687, 624; waxy solid.

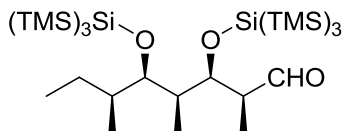

**31** Synthesized by double propionaldehyde addition of **23-Z** and (*S*)-2-methylbutanal.<sup>7</sup> As shown in **Scheme S-17**

**Scheme S-17**



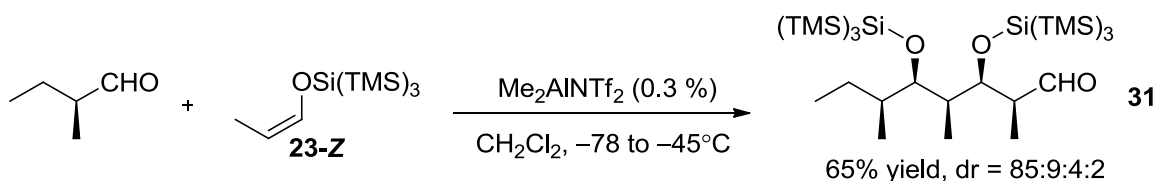

A 200 mL round bottomed flask with magnetic stir bar and septum was charged with **23-Z** (3.5g, 11.5 mmol), CH<sub>2</sub>Cl<sub>2</sub> (60 mL), and (*S*)-2-methyl butanal (0.525 mL, 5.0 mmol). The reaction was cooled to -78 °C and freshly prepared Me<sub>2</sub>AlNTf<sub>2</sub> (0.05 M CH<sub>2</sub>Cl<sub>2</sub>, 0.7 mL) was added dropwise. The reaction was stirred at -78 °C then warmed to -45 °C and stirred at this temperature overnight. The reaction was then quenched with 10mL of NaK tartrate (sat. aq.). The mixture was vigorously stirred at r.t. for 10 min, then poured on hexanes 100 mL. The layers were separated and the organic layer was washed with brined, dried (MgSO<sub>4</sub>), filtered and concentrated. Flash chromatography (300 mL silica gel, 5→15% v/v CH<sub>2</sub>Cl<sub>2</sub>/hexanes) yield **31** with good separation of diastereomers (3.15 g, 65% yield)

**Data for 31:** TLC: R<sub>f</sub> = 0.36 (25:75 CH<sub>2</sub>Cl<sub>2</sub>/hexanes); <sup>1</sup>H NMR (500 MHz, CDCl<sub>3</sub>) δ = 9.89 (s, 1 H), 3.83 (t, *J*=4.1 Hz, 1 H), 3.23 (dd, *J*=6.1, 2.4 Hz, 1 H), 2.65 (qd, *J*=7.0, 4.7 Hz, 1 H), 1.63 (quind, *J*=6.6, 6.6, 6.6, 6.6, 3.8 Hz, 1 H), 1.51 - 1.59 (m, 2 H), 1.46 (dqdd, *J*=8.0, 7.0, 7.0, 7.0, 6.7, 3.1 Hz, 1 H), 1.20 - 1.30 (m, 1 H), 1.04 (d, *J*=7.0 Hz, 3 H), 0.91 (t, *J*=7.3 Hz, 5 H), 0.89 (d, *J*=7.0 Hz, 3 H), 0.77 (d, *J*=6.7 Hz, 3 H), 0.20 (s, 27 H), 0.18 (s, 27 H); <sup>13</sup>C NMR (500 MHz, CDCl<sub>3</sub>) δ = 204.9, 82.8, 78.4, 51.0, 40.6, 38.3, 27.3, 14.1, 12.6, 12.0, 9.9, 1.3, 1.1; FTIR (thin film): 2940, 2894, 1723, 1457, 1244, 1018, 835, 686, 624; LRMS (APCI+) C<sub>20</sub>H<sub>47</sub>O<sub>2</sub>Si<sub>4</sub><sup>+</sup> [M-TMS<sub>3</sub>SiO]<sup>+</sup> m/z = 431.2 (100%). HRMS (FIA-APIC +) C<sub>17</sub>H<sub>43</sub>O<sub>2</sub>Si<sub>4</sub><sup>+</sup> [M - **23Z** (retro-aldol)]<sup>+</sup> m/z (found: 391.2781 calc: 391.2340) (100%).

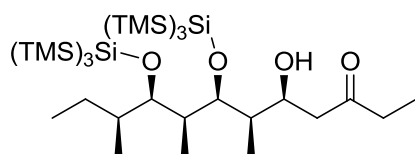

**32** Synthesized according to **GP 4**. Enoloboration was conducted with 2-butanone rather than acetone, with (*c*-Hex)<sub>2</sub>BCl and Et<sub>3</sub>N at room 0°C. **Data for 32:** TLC: R<sub>f</sub> = 0.51 (10:90 EtOAc/hexanes); 4.16 (td, *J*=6.3, 3.2 Hz, 1 H), 3.42 (dd, *J*=5.0, 3.2 Hz, 1 H), 3.24 (dd, *J*=7.0, 1.8 Hz, 1 H), 3.00 (d, *J*=2.7 Hz, 1 H), 2.59 (dd, *J*=17.7, 9.8 Hz, 1 H), 2.52 (m, *J*=2.1 Hz, 1 H), 2.44 (q, *J*=7.3 Hz, 2 H), 1.80 (quind, *J*=6.9, 6.9, 6.9, 6.9, 3.5 Hz, 1 H), 1.59 - 1.67 (m, 1 H), 1.52 - 1.58 (m, 1 H), 1.42 (dq, *J*=11.6, 7.6, 7.6, 7.6, 4.0 Hz, 1 H), 1.20 - 1.30 (m, 2 H), 1.06 (t, *J*=7.3 Hz, 3 H), 1.01 (d, *J*=7.0 Hz, 3 H), 0.95 (d, *J*=7.0 Hz, 3 H), 0.89 (t, *J*=7.3 Hz, 4 H), 0.78 (d, *J*=7.0 Hz, 3 H), 0.19 (br. s, 54 H); <sup>13</sup>C NMR (500 MHz, CDCl<sub>3</sub>) δ = 214.8, 83.0, 80.1, 67.3, 47.9, 42.2, 41.5, 38.9, 36.8, 27.4, 16.1, 12.9, 12.3, 11.1, 7.8, 1.4, 1.3; LRMS (APCI +) C<sub>36</sub>H<sub>55</sub>O<sub>3</sub>Si<sub>4</sub><sup>+</sup> [M - TMS<sub>3</sub>SiO]<sup>+</sup> m/z = 503.2 (55%), m/z = 387.2 (100%); LRMS (APCI -): C<sub>29</sub>H<sub>74</sub>O<sub>3</sub>Si<sub>8</sub><sup>-</sup> [M-butanone]<sup>-</sup> m/z = 693.3 (15%).

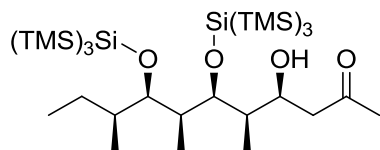

**33** Synthesized according to **GP 4** using 9-BBNOTf for enolborination (Table 4, eq. 3).

**Data for 33** TLC:  $R_f = 0.38$  (10:90 EtOAc/hexanes);  $^1\text{H NMR}$  (500 MHz,  $\text{CDCl}_3$ )  $\delta = 4.16$  (dq,  $J = 10.1, 2.4$  Hz, 1 H), 3.42 (dd,  $J = 5.0, 3.2$  Hz, 1 H), 2.92 (d,  $J = 2.7$  Hz, 1 H), 2.62 (dd,  $J = 17.7, 9.8$  Hz, 1 H), 2.54 (dd,  $J = 17.7, 2.1$  Hz, 1 H), 2.16 (s, 3 H), 1.87 (qt,  $J = 6.1, 3.4$  Hz, 1 H), 1.80 (quind,  $J = 6.9, 6.9, 6.9, 6.9, 3.4$  Hz, 1 H), 1.58 - 1.66 (m, 1 H), 1.50 - 1.58 (m, 1 H), 1.34 - 1.48 (m, 1 H), 1.01 (d,  $J = 7.0$  Hz, 3 H), 0.94 (d,  $J = 6.7$  Hz, 3 H), 0.89 (t,  $J = 7.5$  Hz, 3 H), 0.78 (d,  $J = 6.7$  Hz, 3 H), 0.18 - 0.21 (m, 54 H);  $^{13}\text{C NMR}$  (500 MHz,  $\text{CDCl}_3$ )  $\delta = 210.0, 83.0, 80.2, 67.2, 49.2, 42.1, 41.5, 38.9, 30.8, 27.4, 16.1, 12.9, 12.2, 11.0, 1.4, 1.3$ ; LRMS (APCI $^-$ ):  $\text{C}_{32}\text{H}_{79}\text{O}_4\text{Si}_8$   $[\text{M} - \text{H}]^-$   $m/z = 751.4$  (90%); FTIR (thin film): 3543 (br), 2949, 2894, 1713, 1379, 1244, 1019, 835, 686, 624.

**Stereochemical Assignment:** **33** was determined to (*S*) at C(4) by conversion to *p*-methoxy benzylidene acetal **SI-23** as shown in **Scheme S-19**. The 2,3-*syn*-stereochemistry of **SI-23** was determined by vicinal couplings  $J^{\text{H}2-\text{H}3} = 2.1$  Hz  $J^{\text{H}4-\text{H}3} = 2.1$  Hz. A NOESY experiment revealed NOE between the benzylidene H and  $\text{H}^2/\text{H}^4$ , indicating C(4)-C(6)-*syn* stereochemistry. NOE interactions between  $\text{H}^2$  and  $\text{H}^4$  also support this structure. A COSY experiment validated assignment of  $^1\text{H NMR}$  resonances.

**Scheme S-19:** Synthesis of **SI-23** and selected  $^1\text{H NMR}$   $J$  values and NOE interactions.

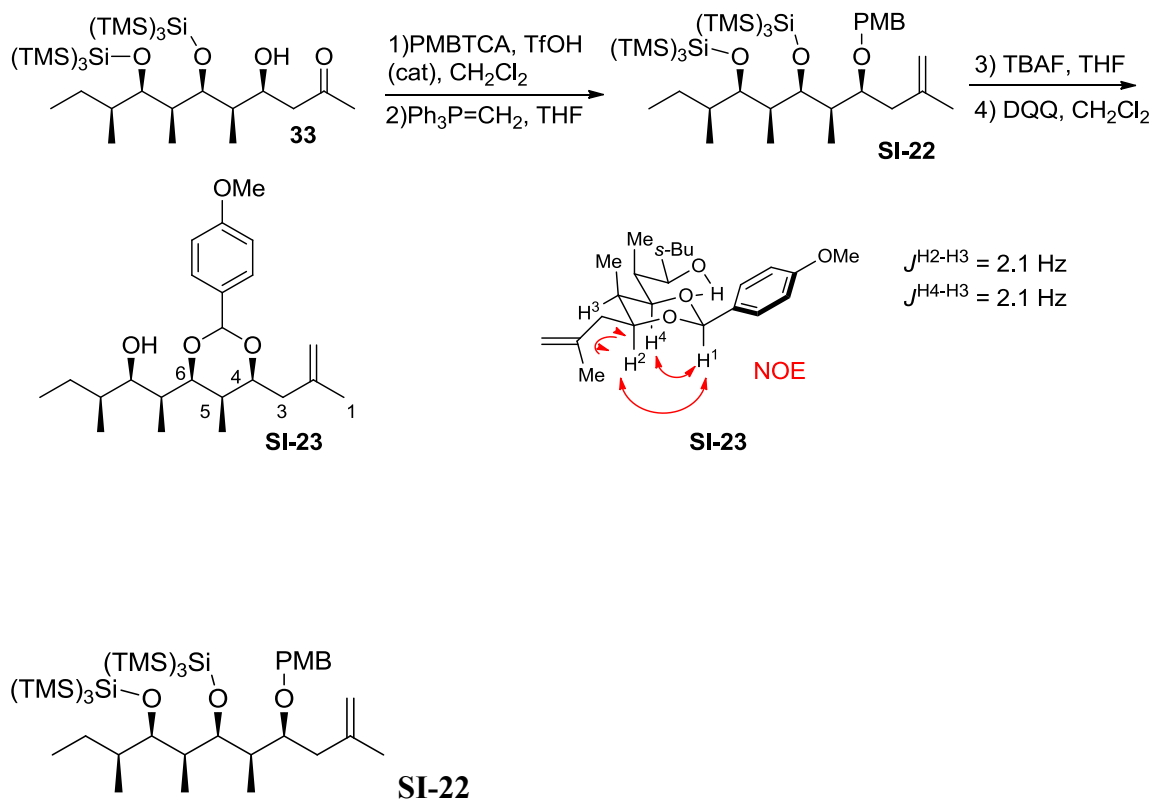

(1) To a dry 10 mL round-bottomed flask with stir bar was added **33** (0.2 mmol). CH<sub>2</sub>Cl<sub>2</sub> (0.5 mL) and hexanes (1.5 mL) were added and flask cooled to 0°C. *p*-methoxybenzyltrichloroacetimidate was added (90 mg, 0.35 mmol), followed by TfOH (0.03 mL, 1.0 M CH<sub>2</sub>Cl<sub>2</sub>). The reaction was allowed to warm to r.t., and stirred overnight. The reaction was then quenched by addition of NaHCO<sub>3</sub>. Normal aqueous workup, followed by column chromatography (30 mL silica gel, 1→10% v/v Et<sub>2</sub>O/hexanes) afford the PMB-protected alcohol in 71% yield.

(2) Wittig reaction performed according to **GP 6** (step 2), 63% yield)

**Data for SI-22:** TLC: R<sub>f</sub> = 0.59 (20:80 Et<sub>2</sub>O/hexanes); <sup>1</sup>H NMR (500 MHz, CDCl<sub>3</sub>) δ = 7.20 (d, *J* = 8.7 Hz, 2 H), 6.84 (d, *J* = 8.7 Hz, 2 H), 4.37 (s, 2 H), 4.10 (qd, *J* = 5.2, 1.1 Hz, 1 H), 3.48 (dd, *J* = 6.5, 2.1 Hz, 1 H), 3.26 (dd, *J* = 7.6, 1.1 Hz, 1 H), 2.78 (dd, *J* = 16.9, 6.6 Hz, 1 H), 2.63 (dd, *J* = 16.8, 5.2 Hz, 1 H), 2.12 (s, 3 H), 1.73 - 1.81 (m, 1 H), 1.56 - 1.70 (m, 2 H), 1.37 - 1.44 (m, 1 H), 1.26 - 1.35 (m, 1 H), 1.07 (d, *J* = 6.9 Hz, 3 H), 1.04 (d, *J* = 6.9 Hz, 3 H), 0.84 - 0.91 (m, 3 H), 0.73 (d, *J* = 6.7 Hz, 3 H), 0.21 (s, 27 H), 0.19 (s, 27 H); <sup>13</sup>C NMR (500 MHz, CDCl<sub>3</sub>) δ = 206.9, 159.1, 131.1, 129.2, 113.7, 84.0, 79.6, 75.4, 71.7, 55.4, 47.7, 42.7, 42.1, 38.1, 31.1, 27.9, 15.5, 13.2, 12.1, 12.1, 1.4, 1.3; LRMS (APCI -): C<sub>37</sub>H<sub>79</sub>O<sub>5</sub>Si<sub>7</sub> [M - TMS]<sup>-</sup> m/z = 799.3 (60%);

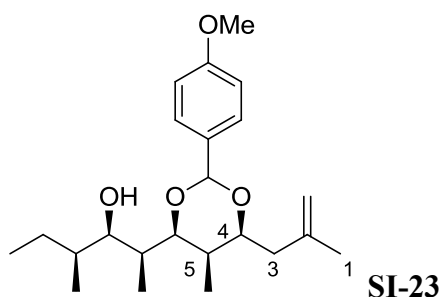

Preparation of **3** TBAF desilylation carried out by analogy to **GP 6** (3). The resultant triol (28 mg, 0.073 mmol) was loaded into a 25 mL round-bottomed flask. CH<sub>2</sub>Cl<sub>2</sub> was added, and stirring mixture cooled to 0°C. Powdered molecular sieves (4Å, 150 mg) were added and the reaction stirred for 1 h. DDQ (25 mg, 0.11 mmol) was then added. A blue color appeared immediately. After 2 h, the reaction was warmed to r.t. filtered through celite (Et<sub>2</sub>O eluent). The resulting organic layer was washed with NaHCO<sub>3</sub> and brine (10 mL) each, dried (Na<sub>2</sub>SO<sub>4</sub>), filtered and concentrated. Flash chromatography (8 mL silica gel, 2→25% EtOAc/hexanes eluent) afforded **SI13** (16 mg, 58% yield), along with the fully oxidized *p*-methoxy benzoyl ester (7 mg, 24% yield).

**Data for SI-23:** TLC: R<sub>f</sub> = 0.38 (25:75 EtOAc/hexanes); <sup>1</sup>H NMR (500 MHz, CDCl<sub>3</sub>) δ = 7.43 (d, *J* = 8.8 Hz, 2 H), 6.88 (d, *J* = 8.5 Hz, 5 H), 5.51 (s, *H*<sup>1</sup>), 4.81 (app d, *J* = 7.3 Hz, 2 H), 4.02 (ddd, *J* = 7.7, 5.7, 2.1 Hz, *H*<sup>2</sup>), 3.80 (s, 1 H), 3.78 (dd, *J* = 11.4, 2.1 Hz, *H*<sup>4</sup>), 3.28 - 3.35 (m, 1 H), 2.41 (dd, *J* = 14.0, 7.6 Hz, 1 H), 2.21 (dd, *J* = 14.2, 6.0 Hz, 1 H), 2.02 (qdd, *J* = 9.2, 9.2, 9.2, 6.9, 2.1 Hz, 6 H), 1.79 (s, 3 H), 1.74 (qt, *J* = 6.8, 2.1 Hz, *H*<sup>3</sup>), 1.53 (td, *J* = 6.1, 3.1 Hz, 1 H), 1.42 - 1.50 (m, 1 H), 1.19 - 1.30 (m, 1 H), 1.00 (d, *J* = 6.7 Hz, 1 H), 1.01 (d, *J* = 5.5 Hz, 1 H), 0.97 (d, *J* = 6.7 Hz, 3 H), 0.90 (t, *J* = 7.3 Hz, 1 H); <sup>13</sup>C NMR (500 MHz, CDCl<sub>3</sub>) δ = 159.8, 142.5, 131.9, 127.4, 113.7, 112.7, 101.6, 84.1, 79.7, 74.6, 55.4, 41.1, 38.1, 35.8, 32.3, 24.9, 23.2, 15.7, 11.1, 8.8, 6.4; LRMS (API-ES +), C<sub>23</sub>H<sub>35</sub>O<sub>3</sub> [M - OH]<sup>+</sup> m/z = 359.1 (100%), C<sub>23</sub>H<sub>35</sub>O<sub>3</sub><sup>+</sup> [M+H]<sup>+</sup> m/z = 377.2 (35%).

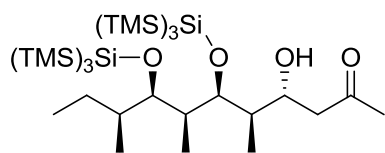

**34** Synthesized according to **GP 9**. **Data for 34:** TLC:  $R_f = 0.60$  (10:90 EtOAc/hexanes);  $^1\text{H NMR}$  (500 MHz,  $\text{CDCl}_3$ )  $\delta = 3.95$  (tt,  $J=9.5, 2.5$  Hz, 1 H), 3.75 (dd,  $J=5.8, 1.5$  Hz, 1 H), 3.48 (d,  $J=2.7$  Hz, 1 H), 3.21 (dd,  $J=4.9, 3.7$  Hz, 1 H), 2.63 (dd,  $J=16.3, 2.6$  Hz, 1 H), 2.44 (dd,  $J=16.5, 9.5$  Hz, 1 H), 2.19 (s, 3 H), 1.83 (dq,  $J=9.8, 7.0, 7.0, 7.0, 1.5$  Hz, 1 H), 1.67 - 1.74 (m, 1 H), 1.64 (qt,  $J=7.0, 3.4$  Hz, 1 H), 1.50 (dq,  $J=13.2, 7.6, 7.6, 7.6, 3.4$  Hz, 1 H), 1.13 - 1.23 (m, 1 H), 1.03 (d,  $J=7.0$  Hz, 3 H), 0.88 (t,  $J=7.3$  Hz, 3 H), 0.79 (d,  $J=6.7$  Hz, 3 H), 0.72 (d,  $J=7.0$  Hz, 3 H), 0.20 - 0.22 (m, 27 H), 0.19 - 0.20 (m, 27 H);  $^{13}\text{C NMR}$  (500 MHz,  $\text{CDCl}_3$ )  $\delta = 210.0, 83.0, 79.7, 69.8, 48.6, 42.4, 41.0, 38.8, 31.3, 27.1, 16.4, 13.9, 12.2, 12.1, 1.4, 1.3$ ; LRMS (APCI -):  $\text{C}_{32}\text{H}_{79}\text{O}_4\text{Si}_8$   $[\text{M} - \text{H}]^-$   $m/z = 751.4$  (85%).

**Stereochemical Assignment:** **34** was assigned (*R*) at C(4) by contrast to **33**.

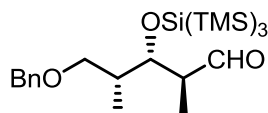

### SI-3

TLC:  $R_f = 0.47$  (25:75  $\text{CH}_2\text{Cl}_2$ /hexanes);  $^{13}\text{C NMR}$  (500 MHz,  $\text{CDCl}_3$ )  $\delta = 203.83, 138.41, 128.41, 127.62, 127.57, 79.68, 72.92, 71.79, 50.75, 38.53, 15.01, 10.98, 0.82$ ;  $^1\text{H NMR}$  (500 MHz,  $\text{CDCl}_3$ )  $\delta = 9.61 - 9.68$  (m, 1 H), 7.26 - 7.40 (m, 4 H), 4.42 (d,  $J=11.9$  Hz, 1 H), 4.38 (d,  $J=11.9$  Hz, 1 H), 3.84 (ddd,  $J=5.5, 3.8, 1.7$  Hz, 1 H), 3.37 (dd,  $J=9.8, 5.2$  Hz, 1 H), 3.30 (dd,  $J=8.5, 4.0$  Hz, 1 H), 2.60 (s, 1 H), 1.95 (spt,  $J=5.8$  Hz, 1 H), 1.15 (d,  $J=7.0$  Hz, 3 H), 1.04 (d,  $J=7.0$  Hz, 3 H), 0.23 (s, 27 H); LRMS (APCI +)  $\text{C}_{23}\text{H}_{47}\text{O}_3\text{Si}_4^+$   $[\text{M} + \text{H}]^+$   $m/z = 483.4$  (100%)

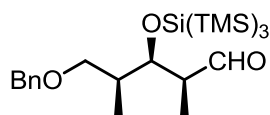

**SI-5a** TLC:  $R_f = 0.42$  (25:75  $\text{CH}_2\text{Cl}_2$ /hexanes)  $^{13}\text{C NMR}$  (500 MHz,  $\text{CDCl}_3$ )  $\delta = 205.03, 138.56, 128.42, 127.72, 127.60, 50.76, 37.29, 12.77, 0.89, 0.80$ ;  $^1\text{H NMR}$  (500 MHz,  $\text{CDCl}_3$ )  $\delta = 9.92$  (s, 1 H), 7.22 - 7.44 (m, 5 H), 4.56 (d,  $J=11.0$  Hz, 9 H), 4.48 (d,  $J=12.2$  Hz, 5 H), 3.92 (dd,  $J=4.7, 2.9$  Hz, 5 H), 3.66 - 3.75 (m, 1 H), 3.52 (dd,  $J=8.7, 6.0$  Hz, 5 H), 3.30 (dd,  $J=8.7, 7.2$  Hz, 5 H), 2.58 - 2.65 (m, 1 H), 2.04 (dq,  $J=13.3, 6.6, 6.6, 6.6, 2.9$  Hz, 5 H), 1.06 (d,  $J=6.7$  Hz, 3 H), 0.90 (d,  $J=7.0$  Hz, 3 H), 0.24 (s, 27 H); LRMS (APCI +)  $\text{C}_{23}\text{H}_{47}\text{O}_3\text{Si}_4^+$   $[\text{M} + \text{H}]^+$   $m/z = 483.4$  (100%)

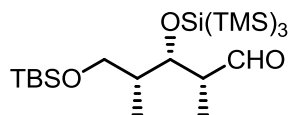

**SI-5b**

TLC:  $R_f = 0.36$  (25:75  $\text{CH}_2\text{Cl}_2$ /hexanes);  $^{13}\text{C}$  NMR (500 MHz,  $\text{CDCl}_3$ )  $\delta = 205.18, 78.12, 65.46, 51.17, 39.38, 26.05, 18.38, 12.21, 9.97, 0.83, -5.14, -5.17$ ;  $^1\text{H}$  NMR (500 MHz,  $\text{CDCl}_3$ )  $\delta = 9.89$  (s, 2 H), 3.87 (dd,  $J=4.9, 3.1$  Hz, 1 H), 3.53 (dd,  $J=9.8, 6.4$  Hz, 2 H), 3.39 (dd,  $J=9.8, 6.4$  Hz, 2 H), 2.56 - 2.66 (m, 2 H), 1.72 - 1.81 (m, 1 H), 1.00 (d,  $J=7.0$  Hz, 3 H), 0.87 (s, 5 H), 0.78 (d,  $J=7.0$  Hz, 3 H), 0.21 (s, 27 H), 0.01 - 0.05 (m, 6 H); LRMS (APCI +)  $\text{C}_{22}\text{H}_{55}\text{O}_3\text{Si}_5^+$   $[\text{M}+\text{H}] m/z = 507.5$  (32%).

**NMR spectra**

1a

PB-4003.001.001.1f.esp

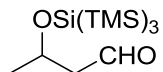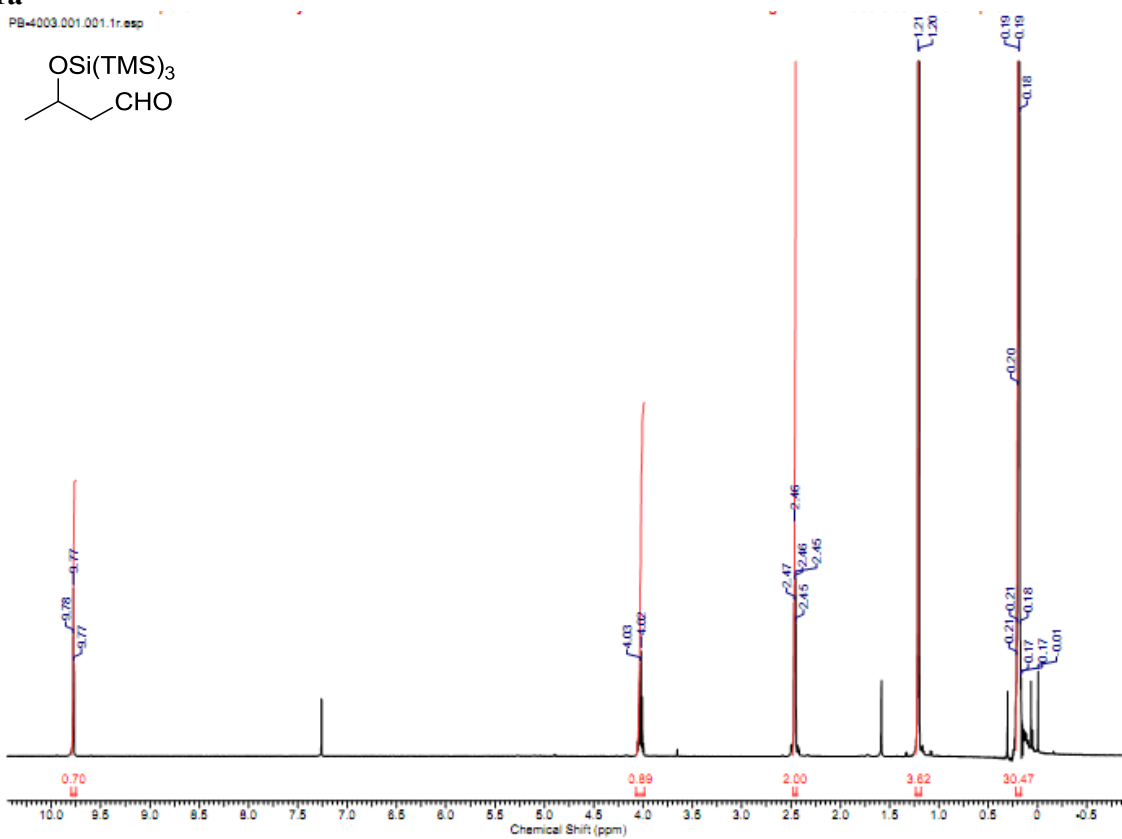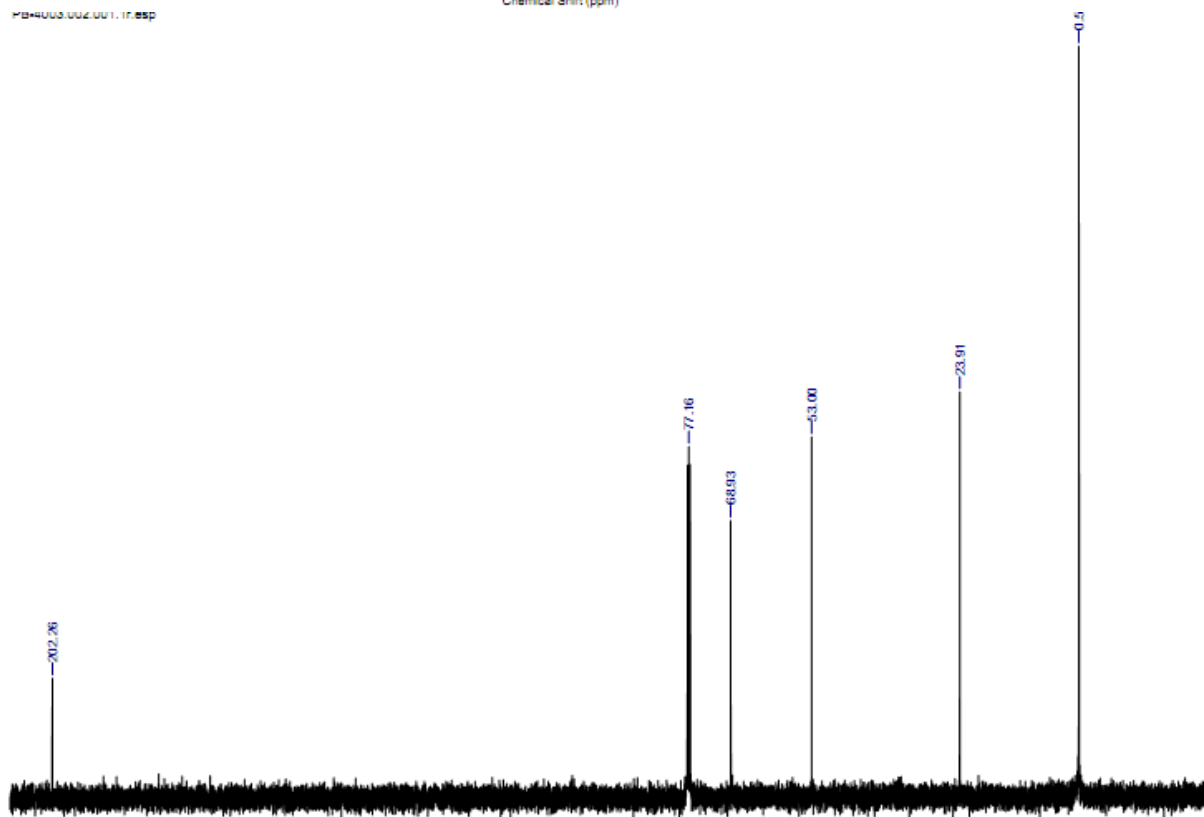

1b

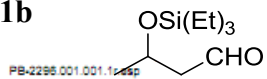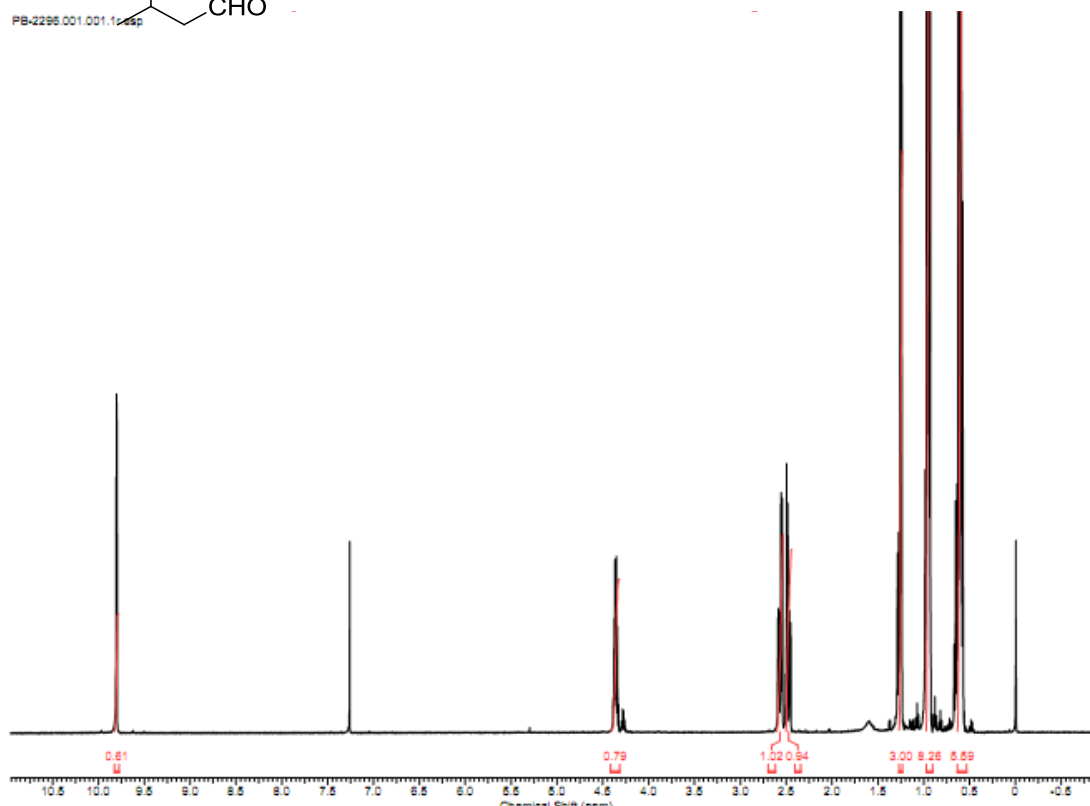

This report was created by ACD/NMR Processor Academic Edition. For more information go to [www.acdlabs.com/nmrprod/](http://www.acdlabs.com/nmrprod/)

PB-2298.002.001.1r.esp

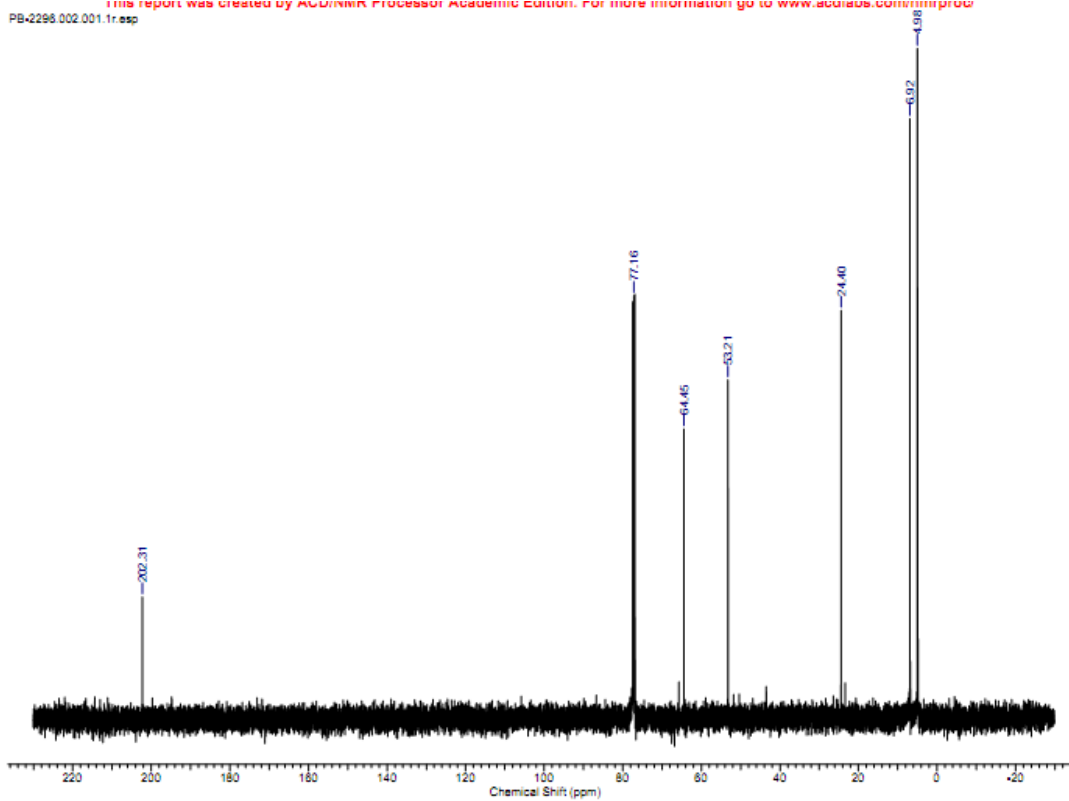

1c

PB-5012-b.001.001.1r.esp

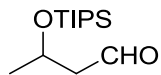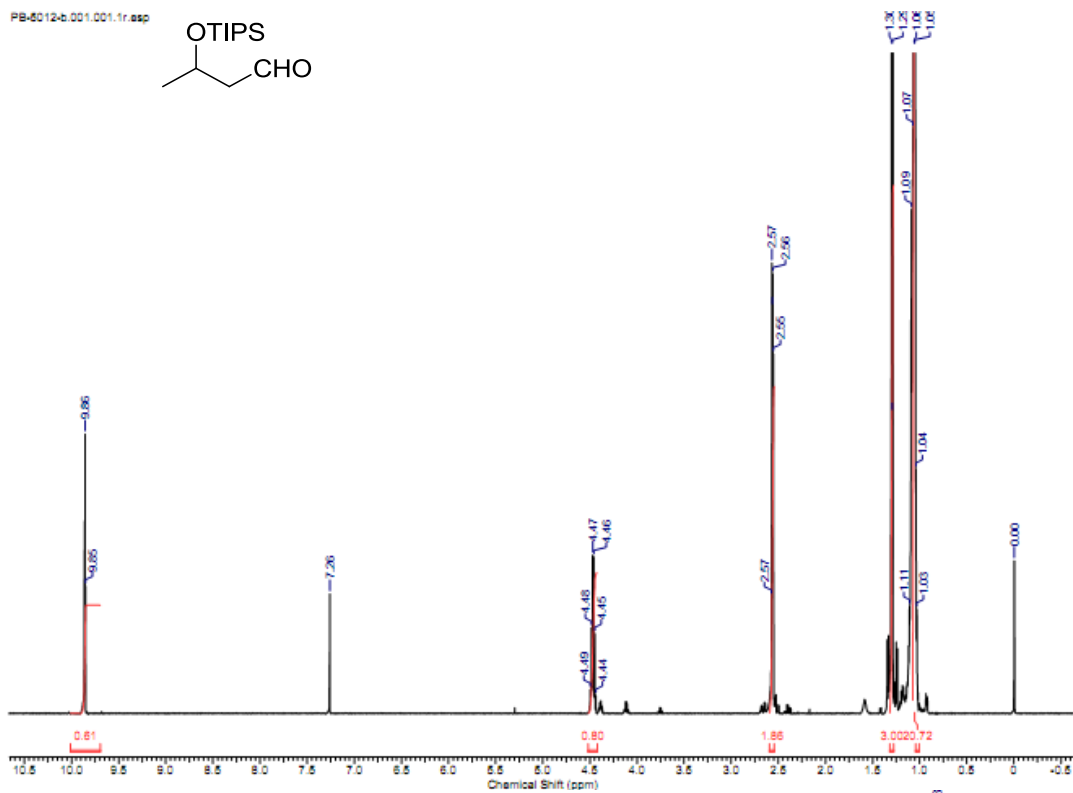

PB-5012-b.002.001.1r.esp

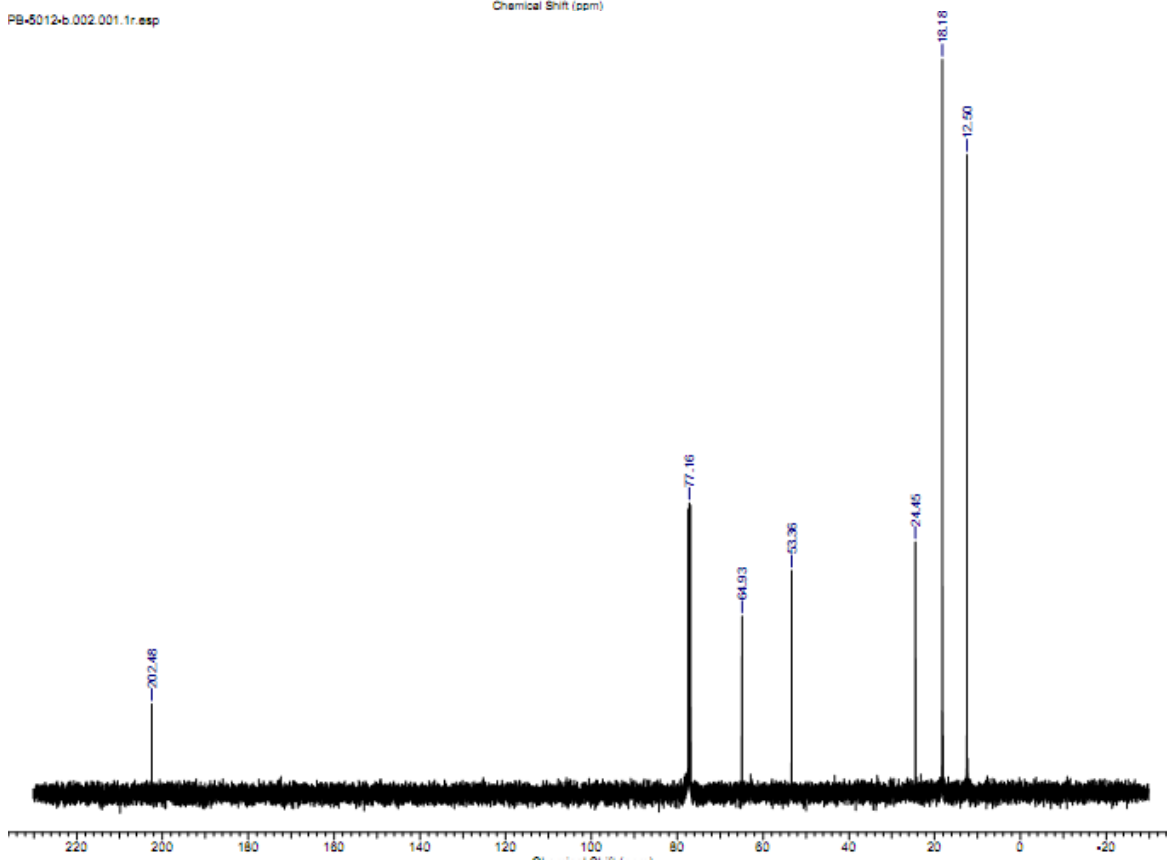



1h

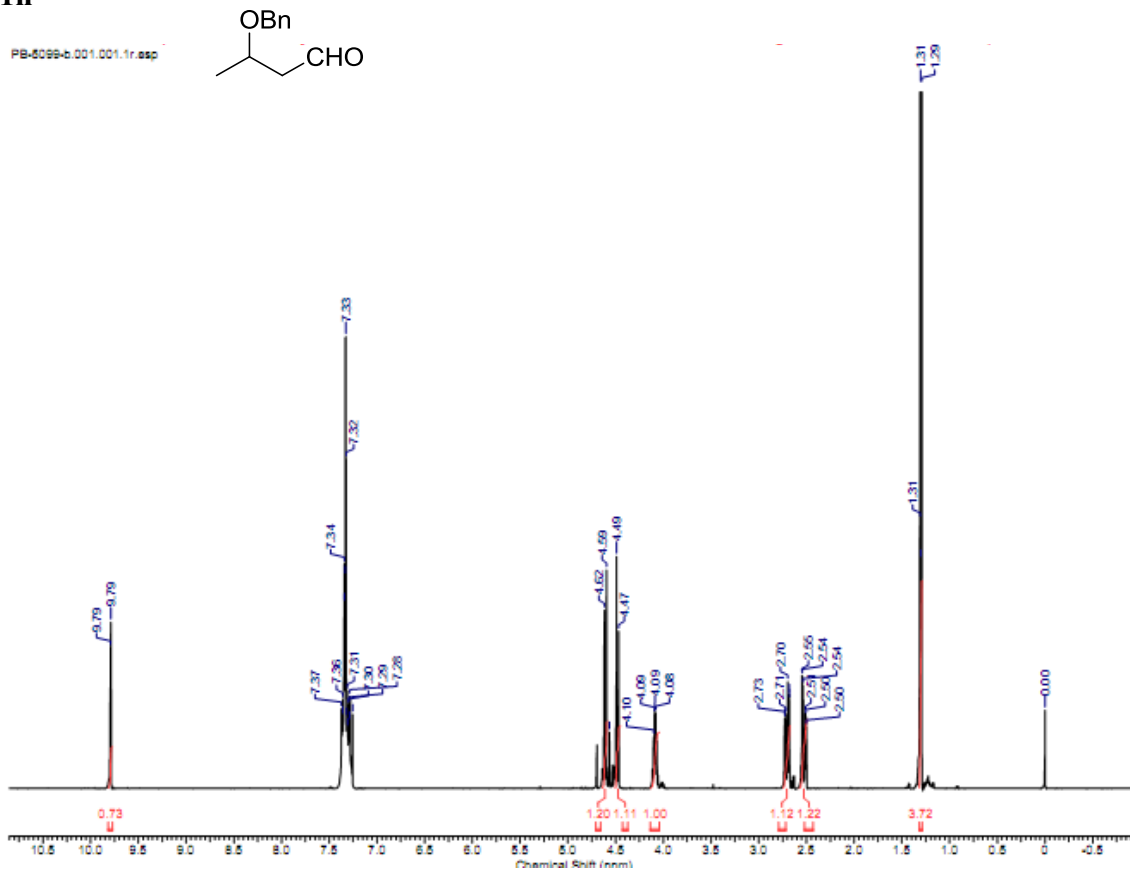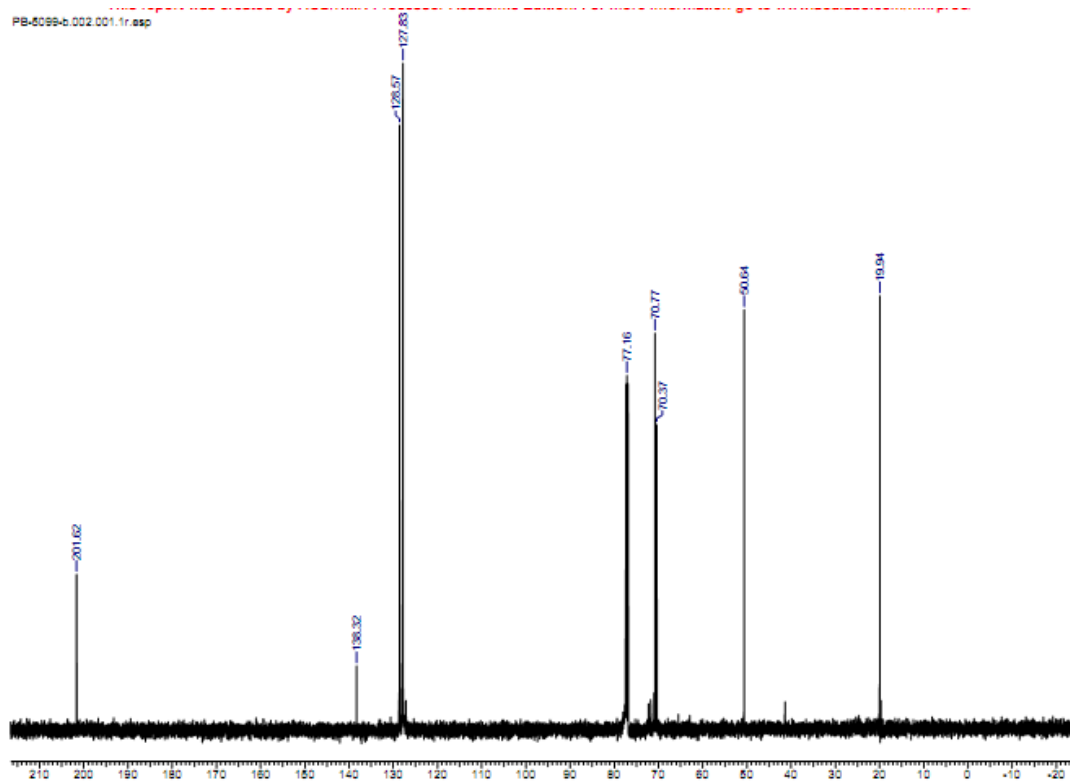

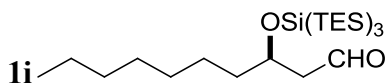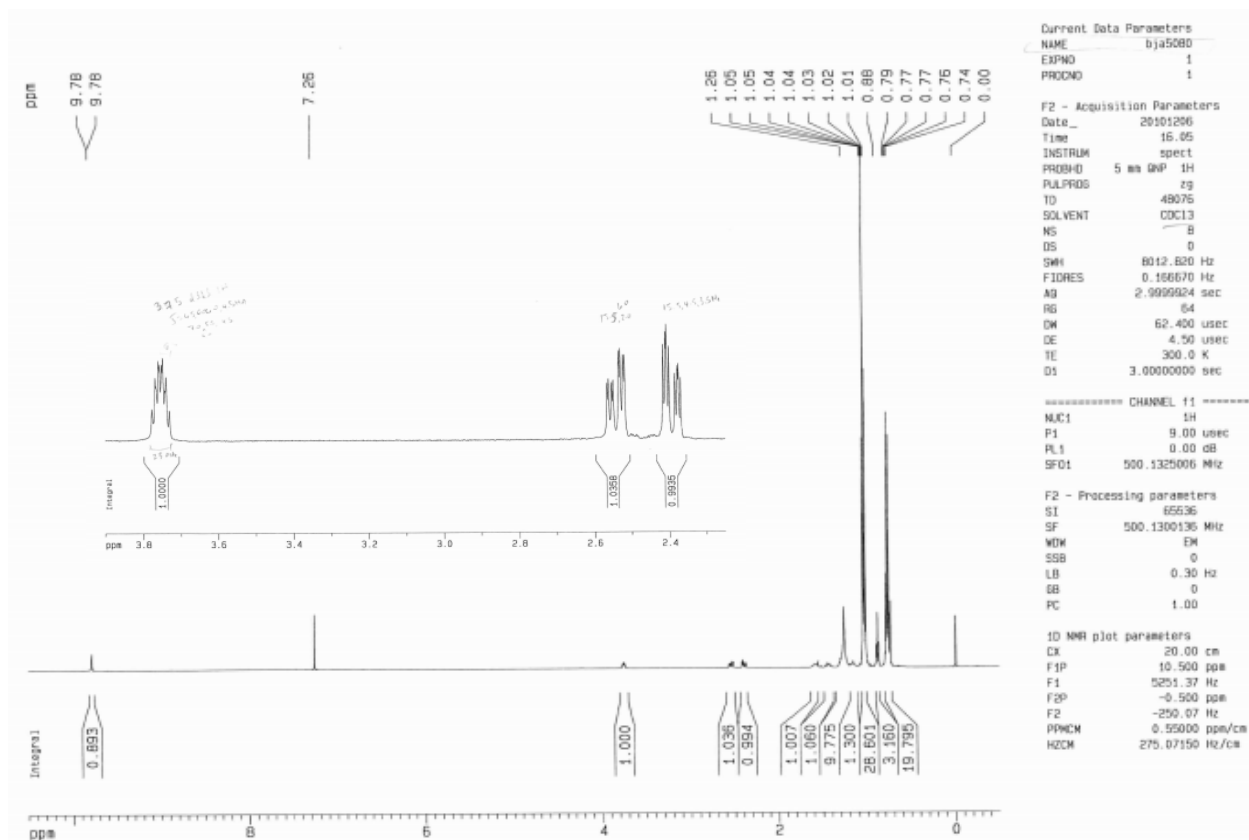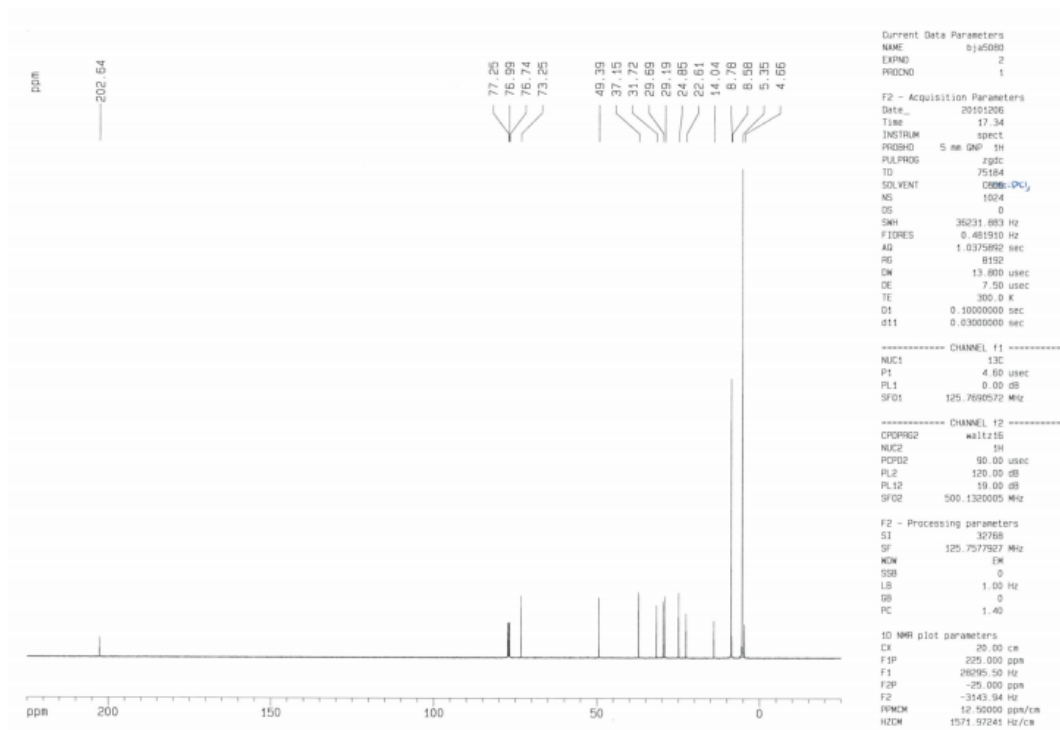

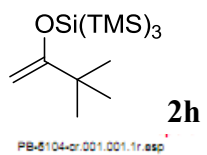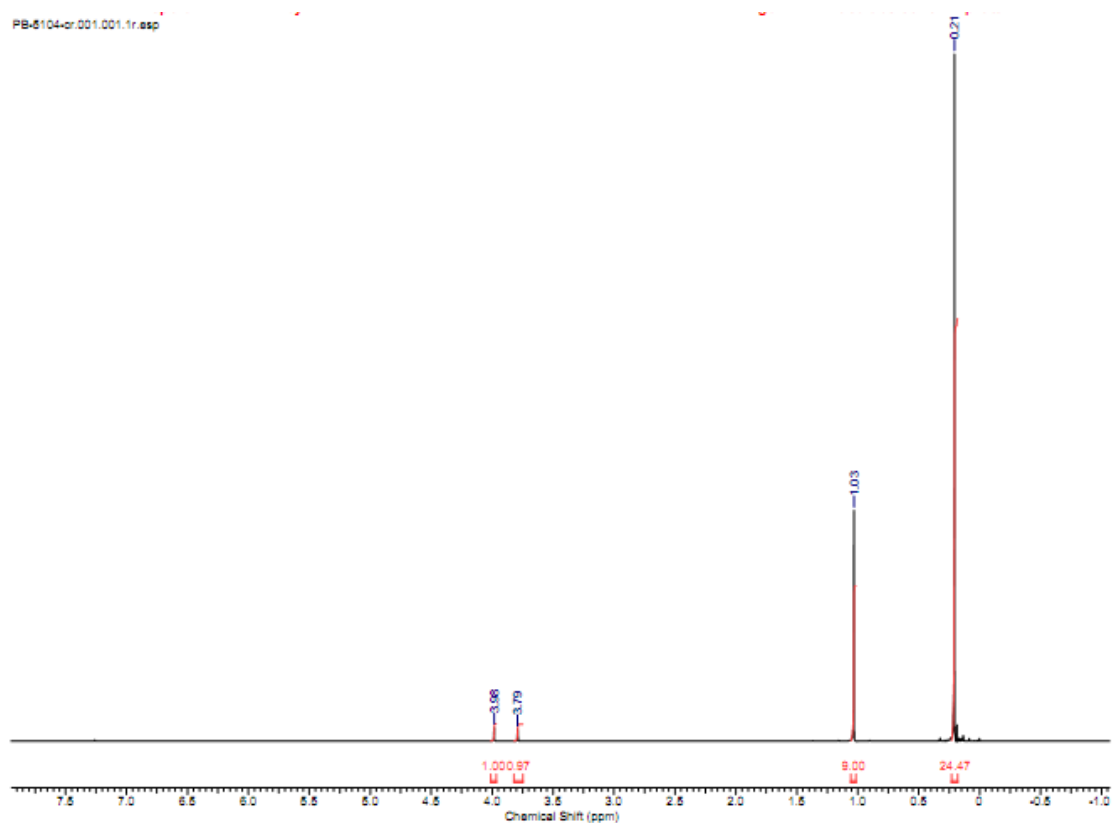

PB-5104-cr.002.001.1r.esp

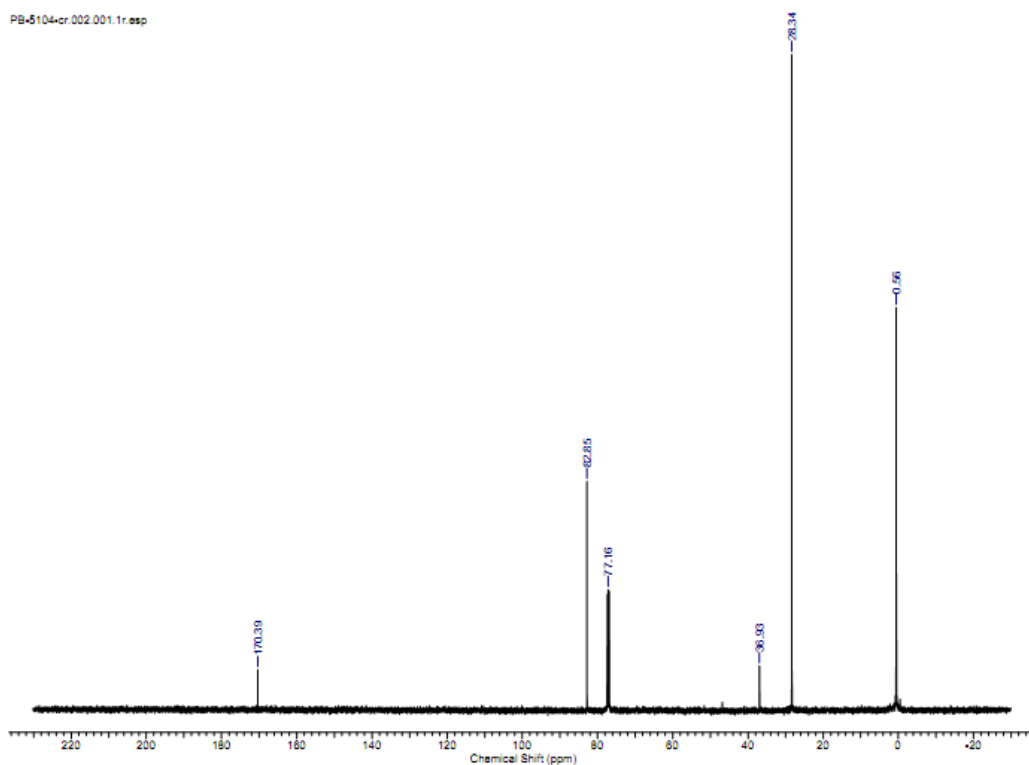

2i

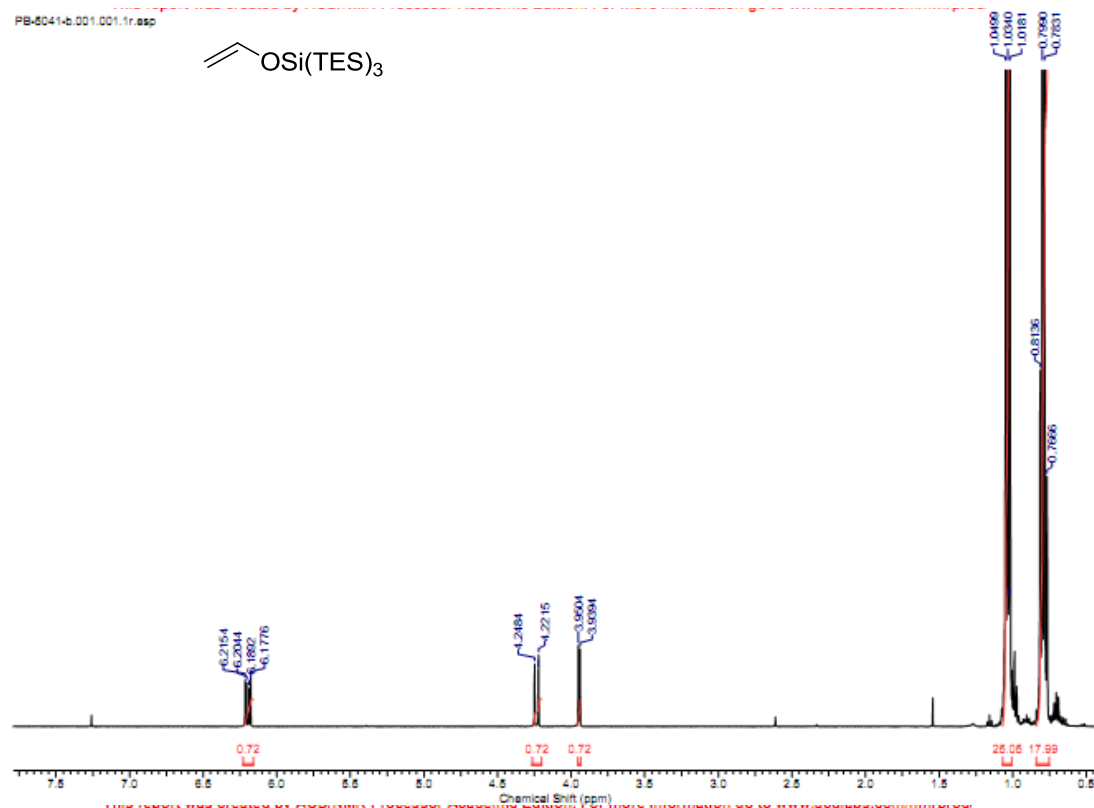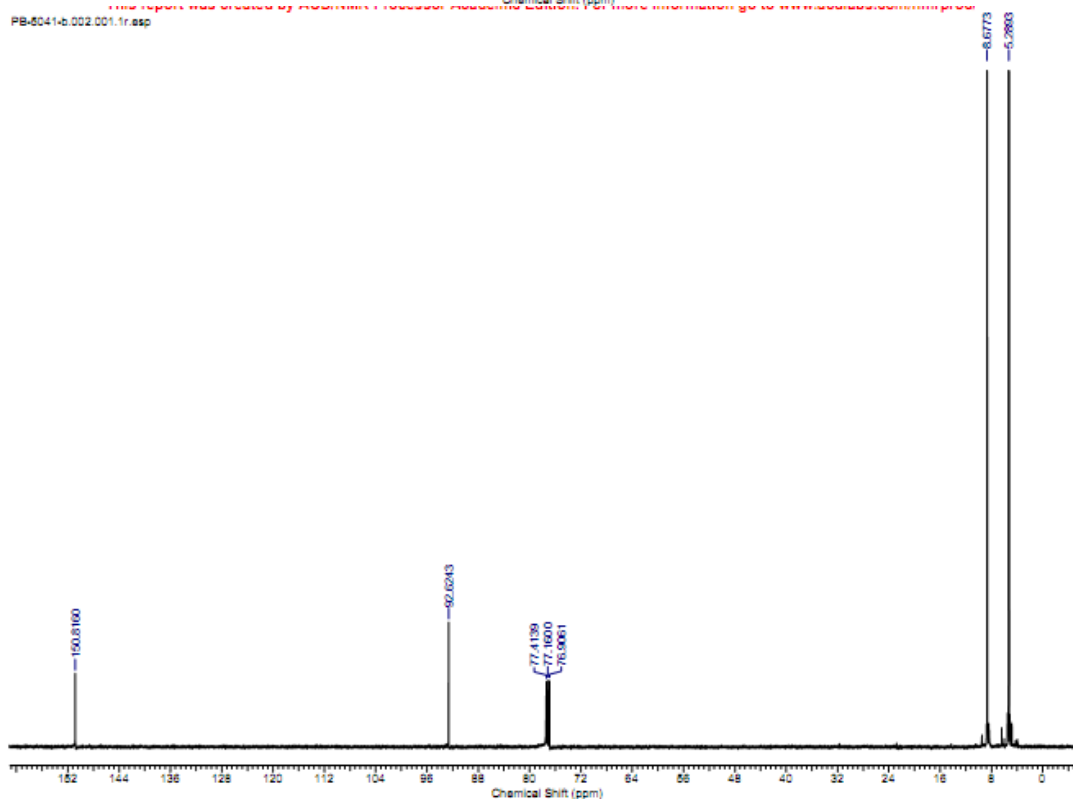

**3a** (dr = 78:22)

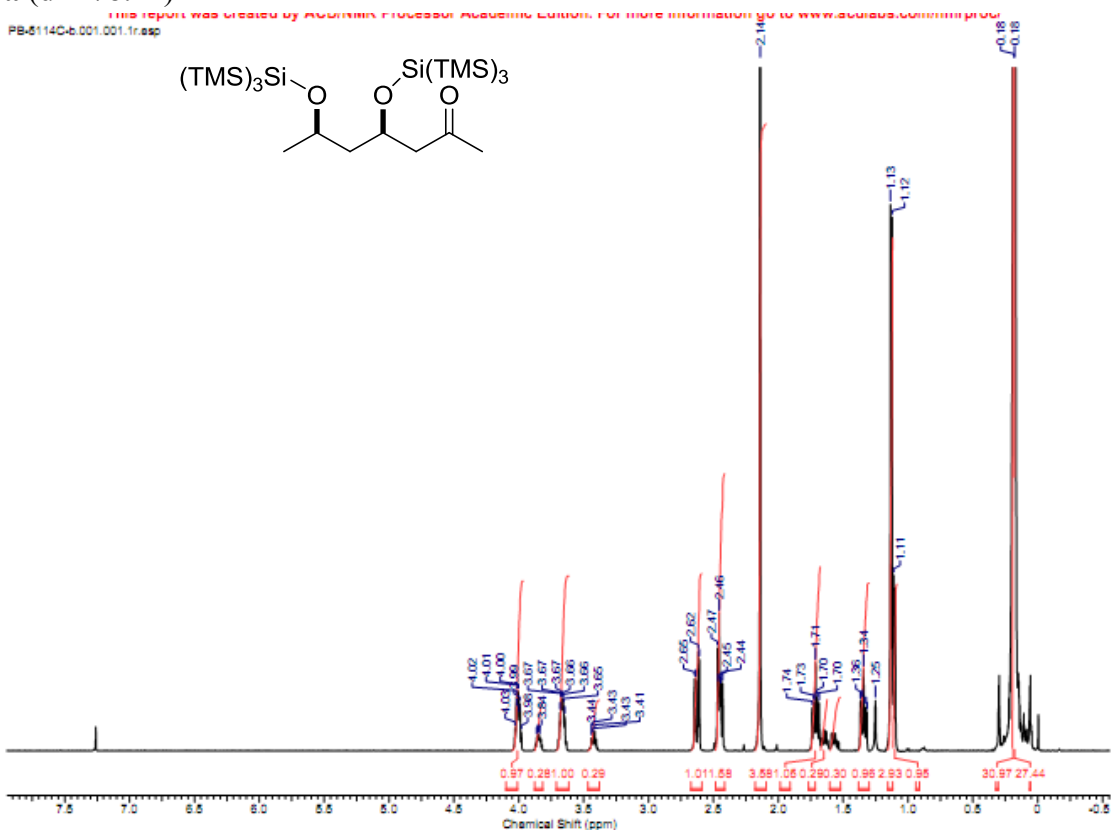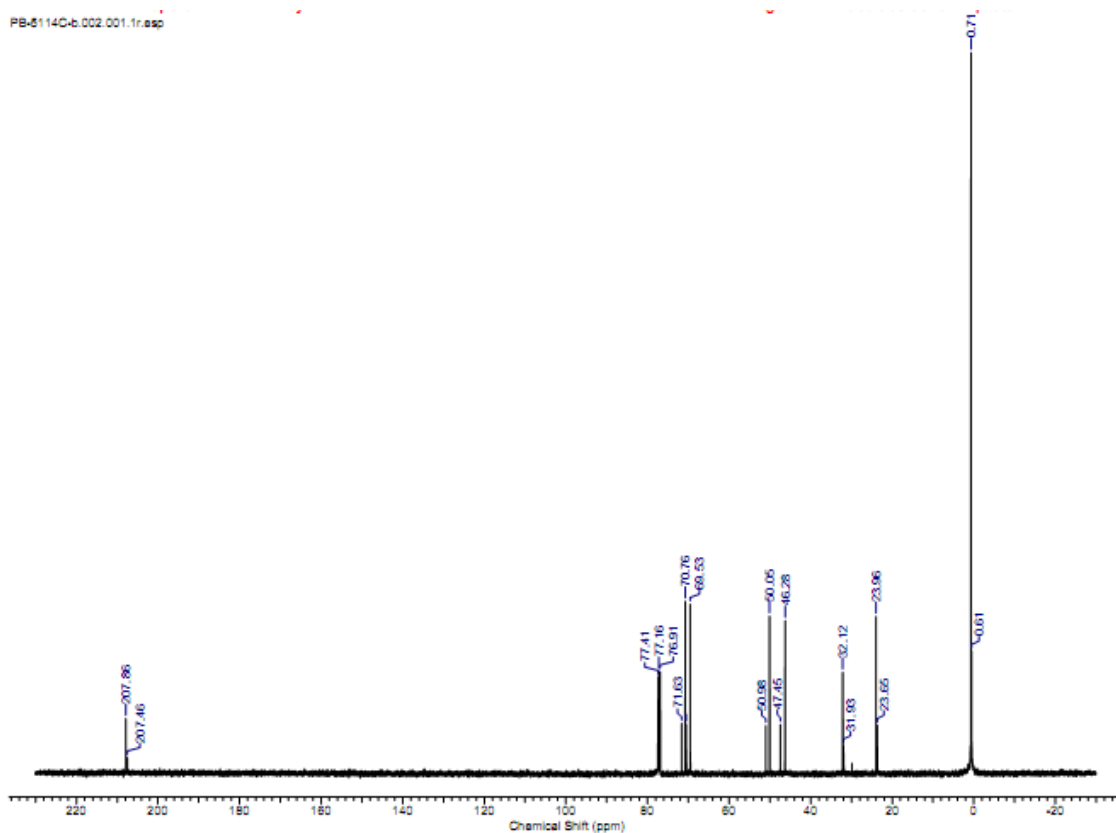

**3b** (dr ~1:1)

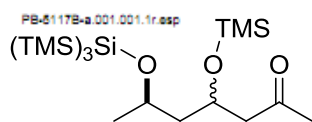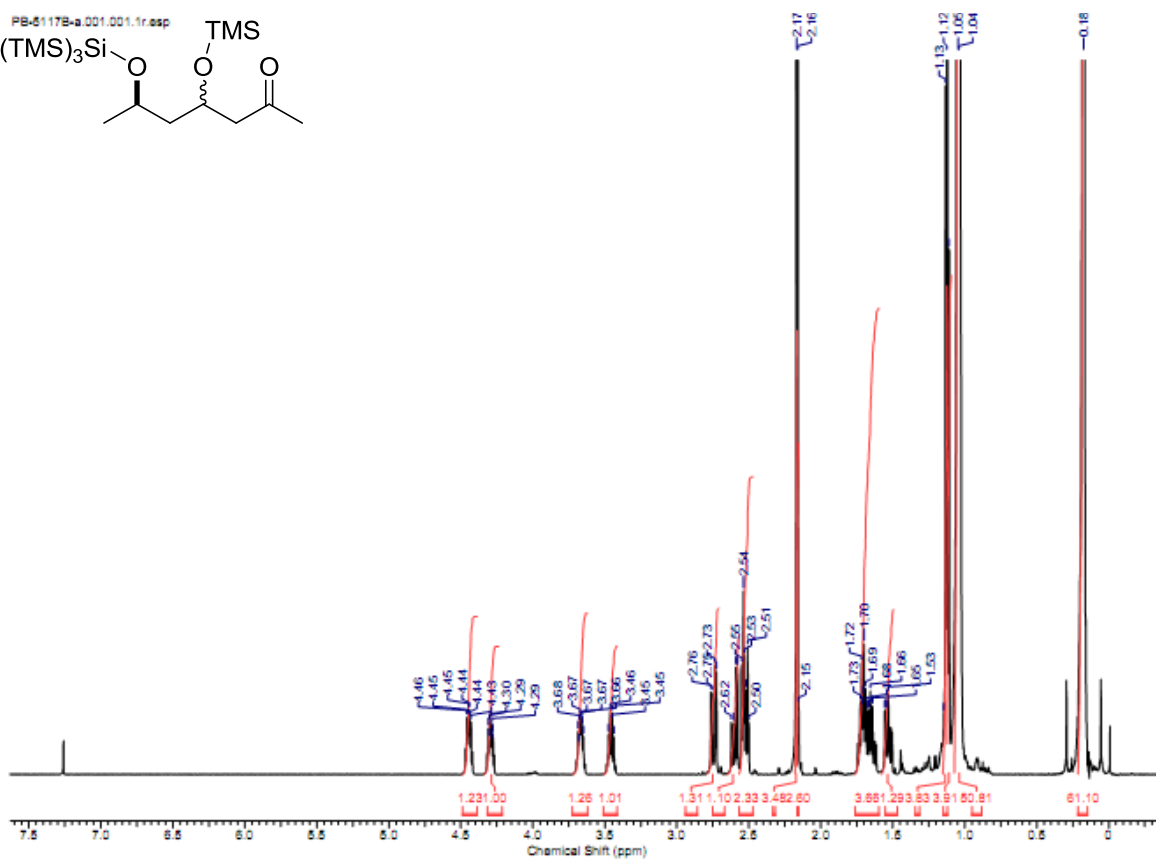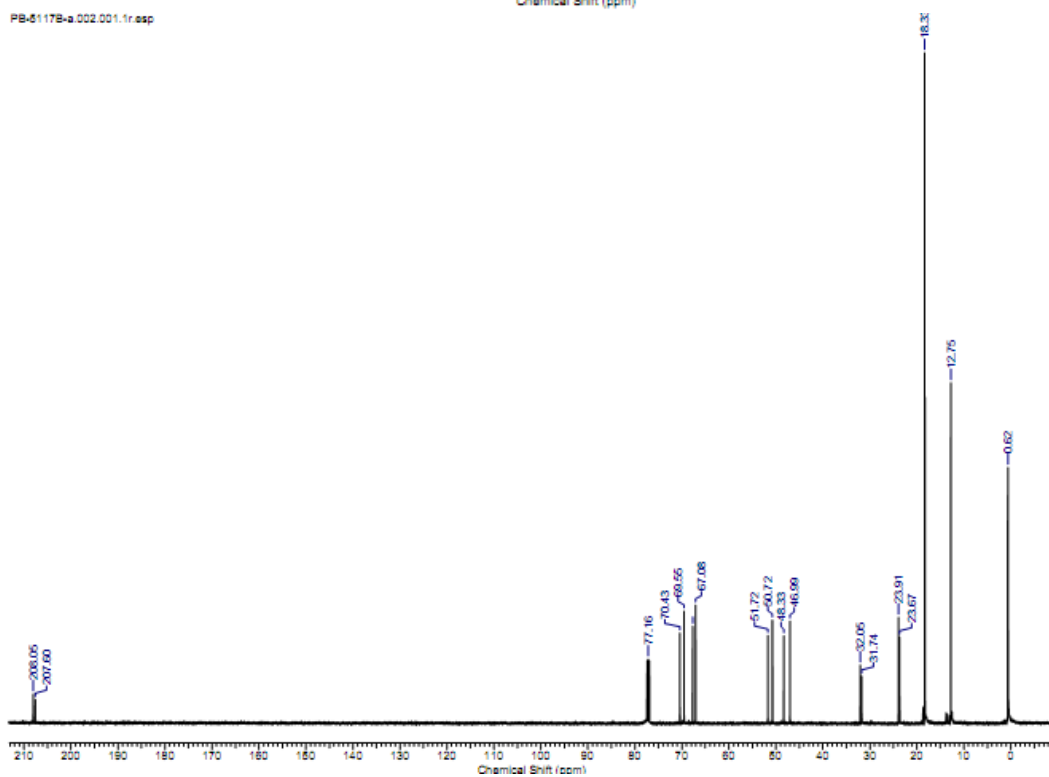

**3c** (dr ~1:1)

PB-5117B-e.001.001.1r.esp

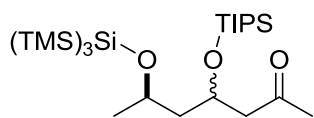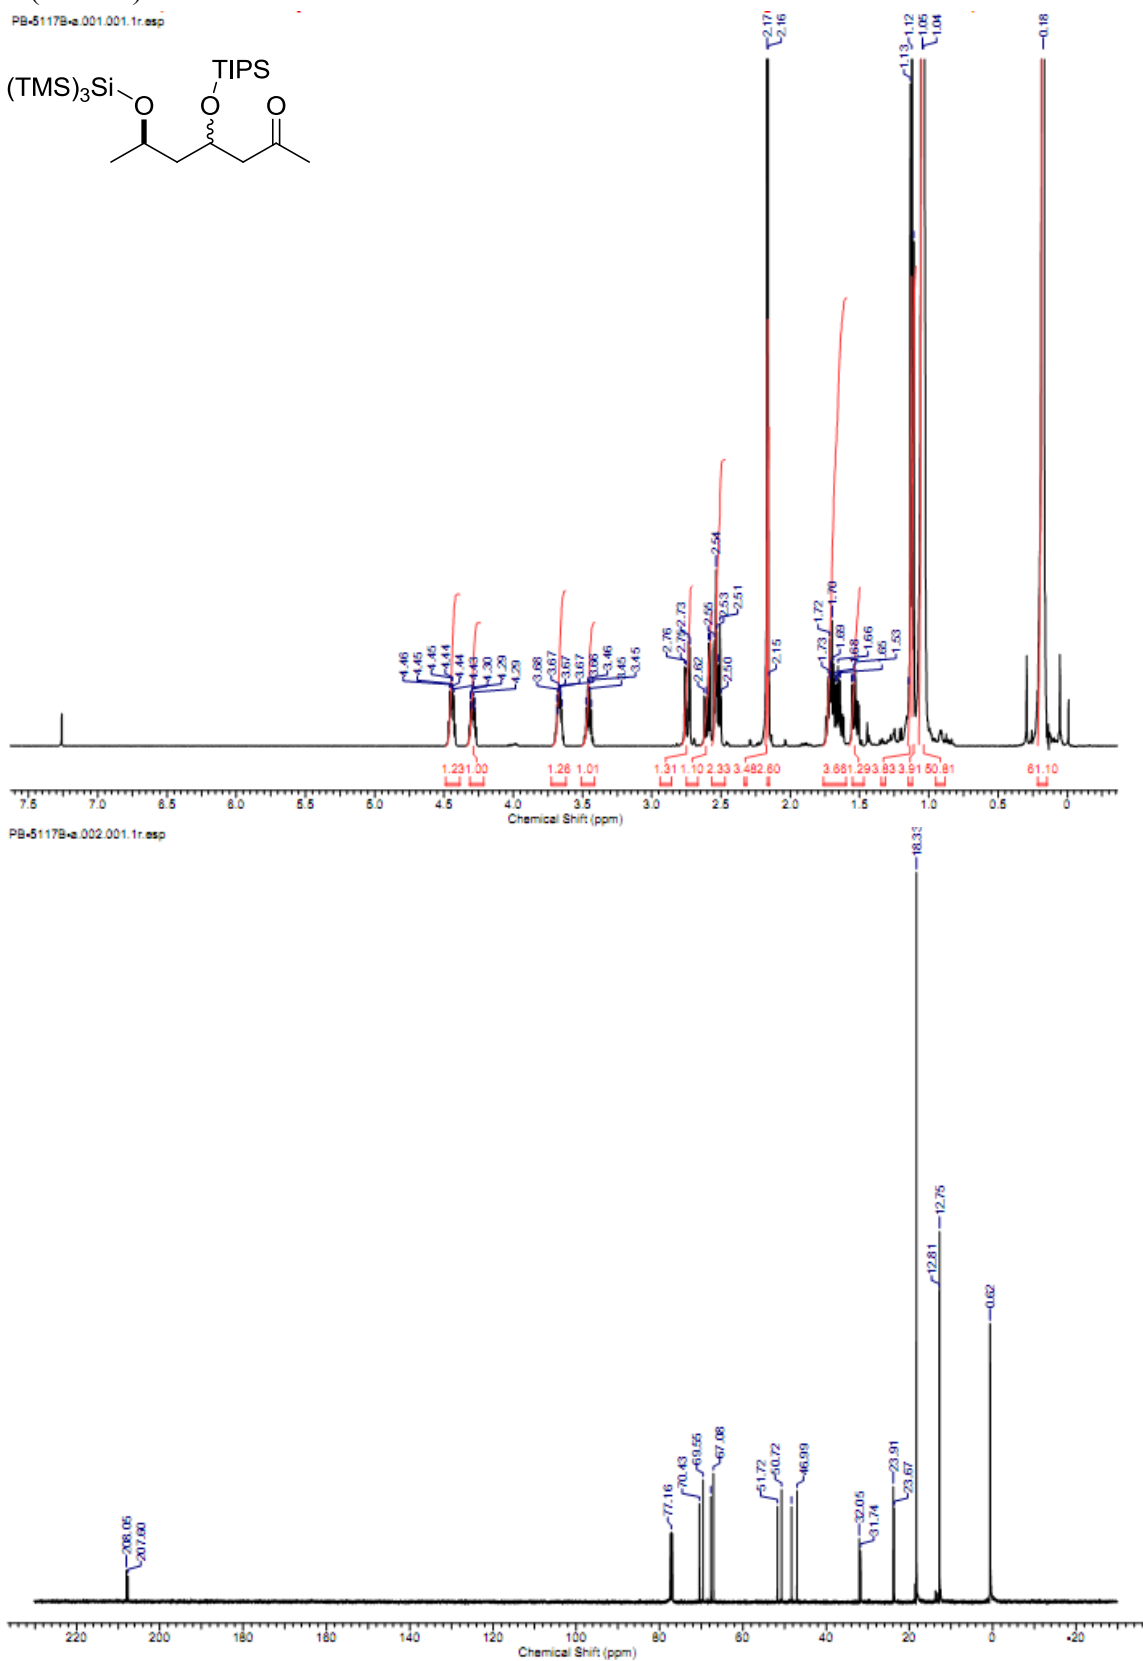

**3d** (dr ~1:1)

PB-5114A-a.001.001.1r.esp

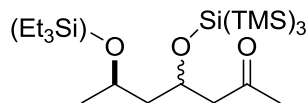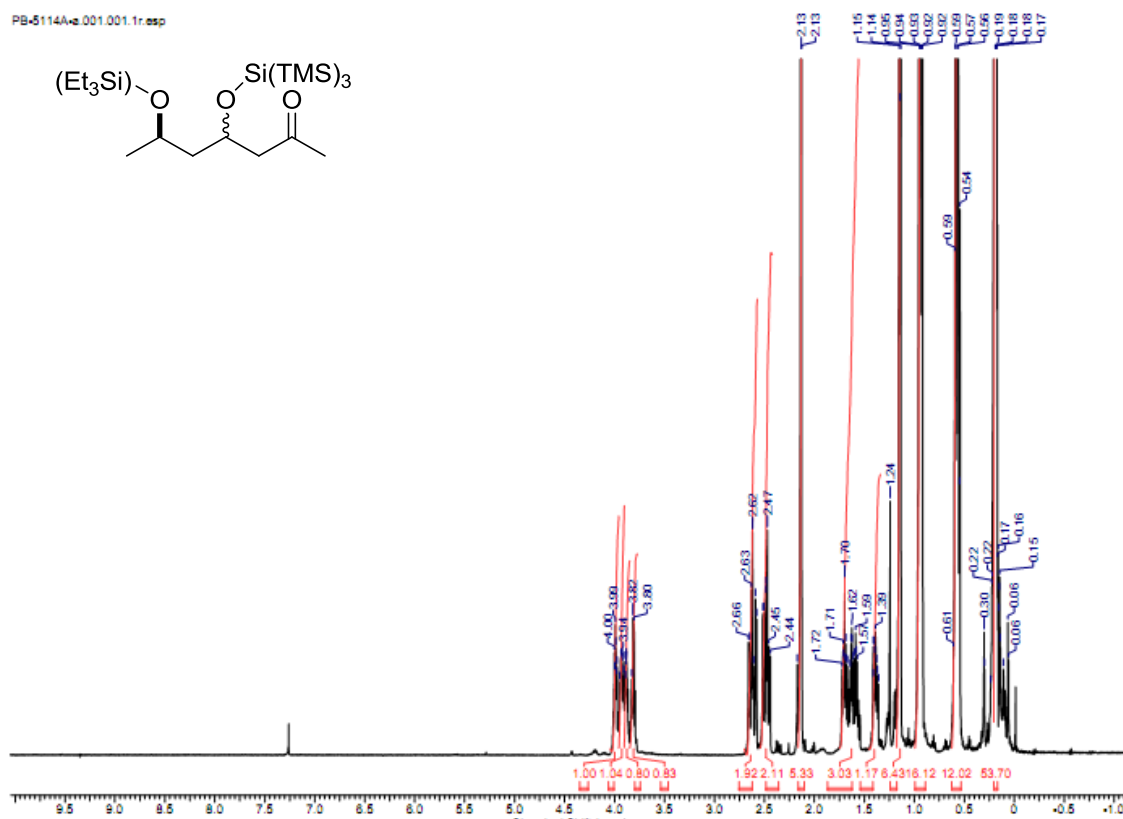

PB-5114A-a.002.001.1r.esp

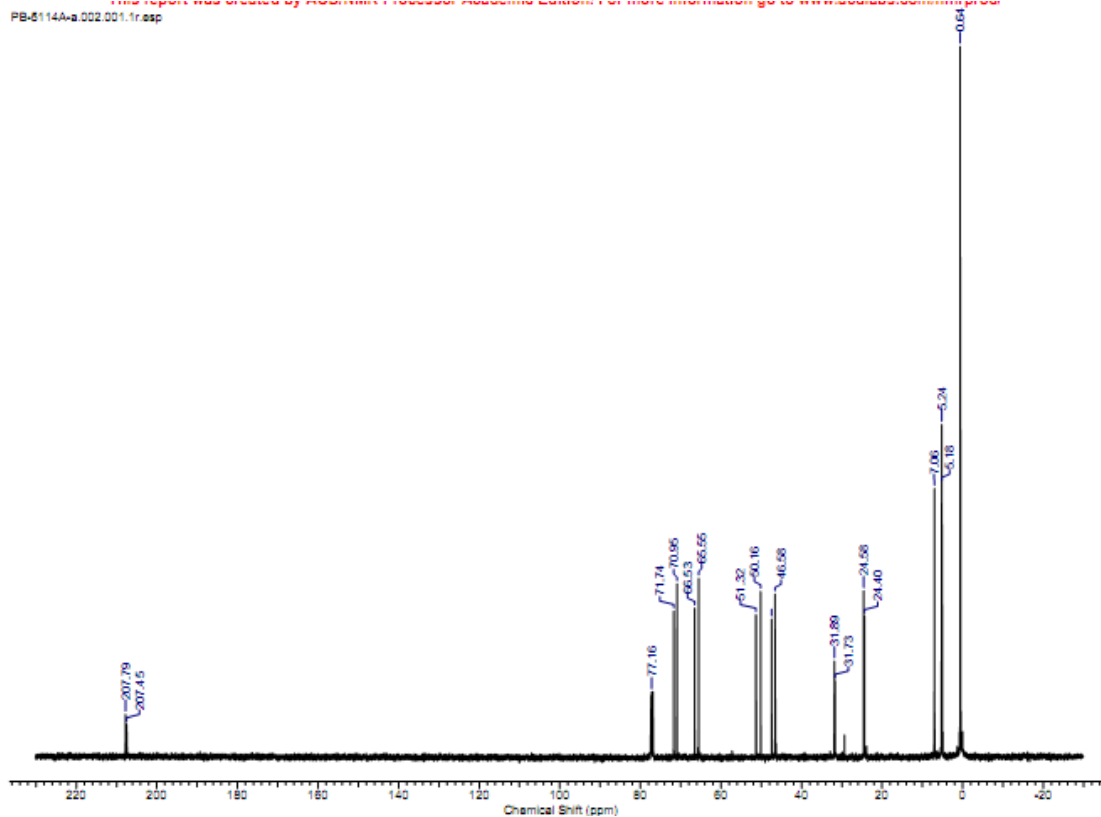



**3e(dr ~1:1)**

PB-5114B-a.001.001.1r.esp

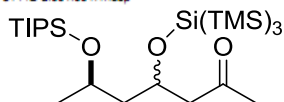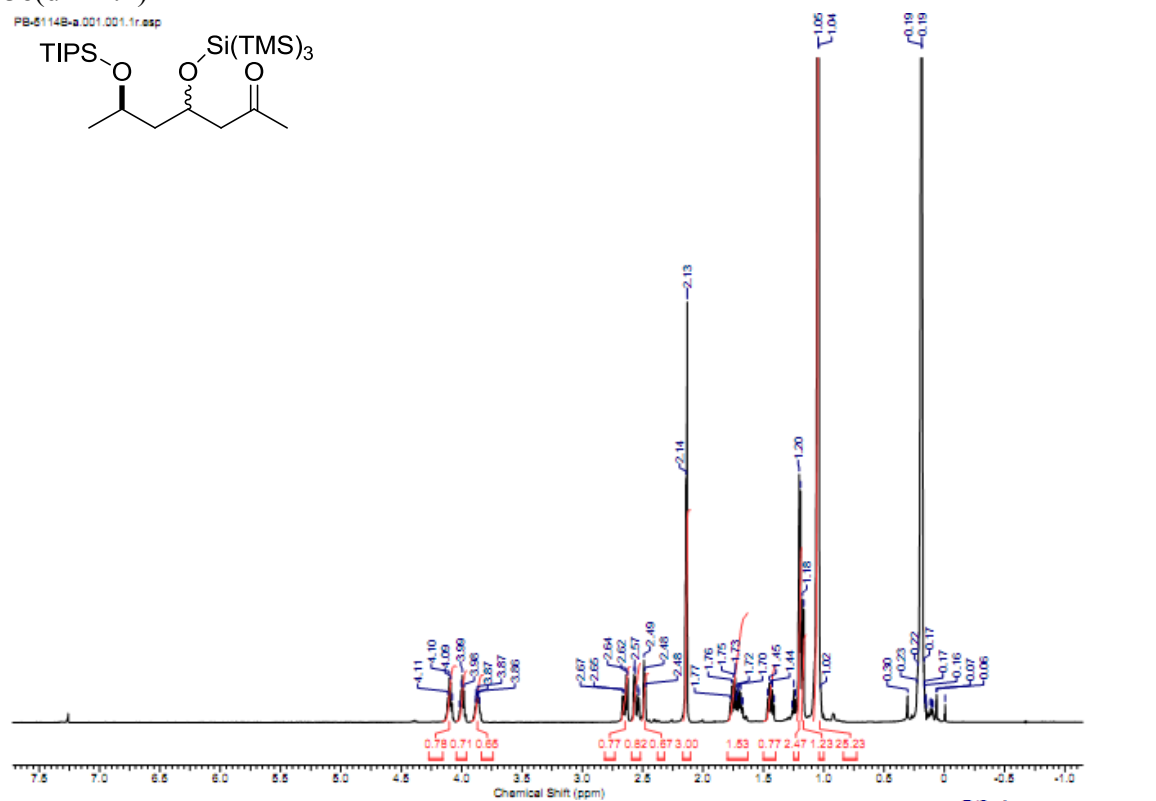

PB-5114B-a.002.001.1r.esp

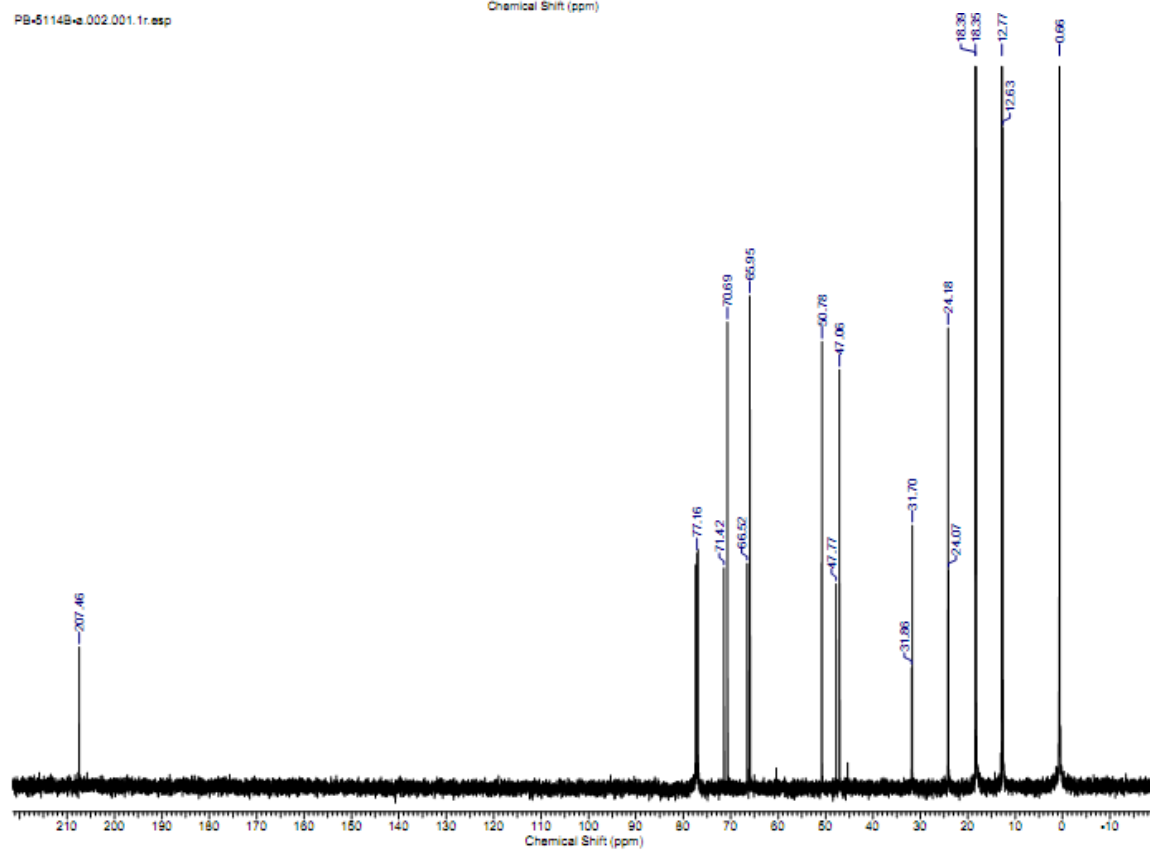

3f

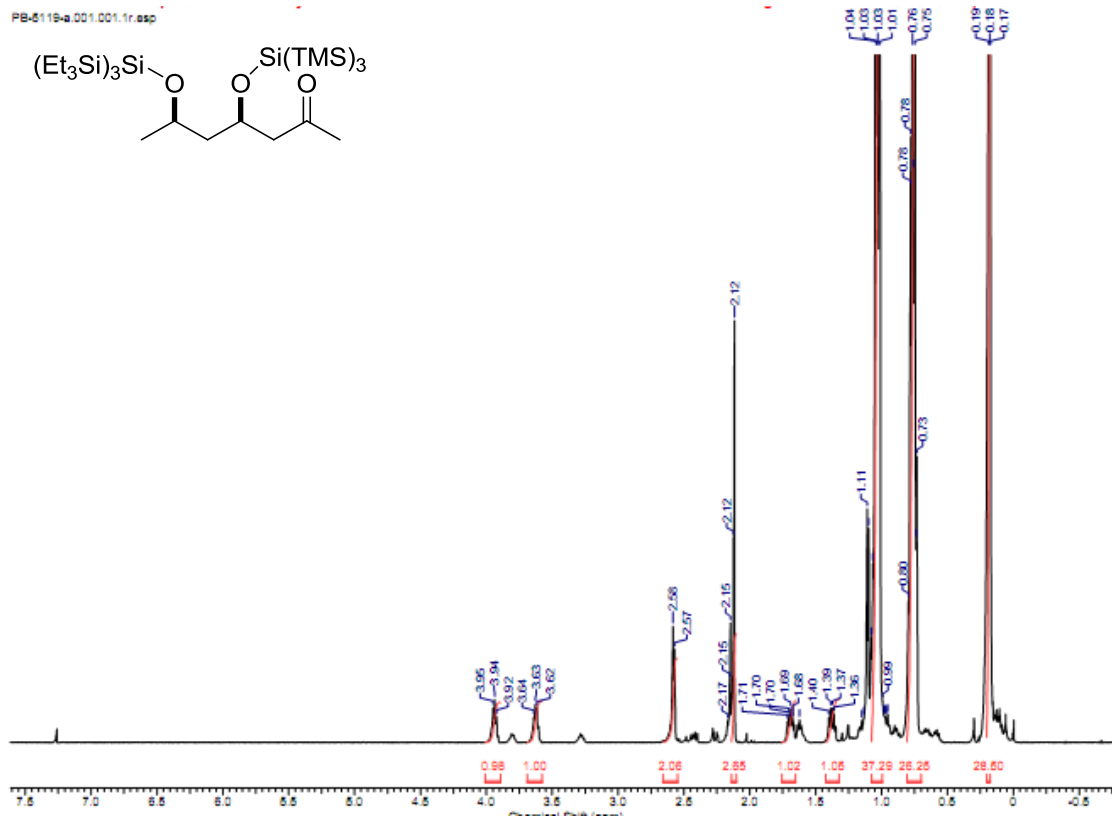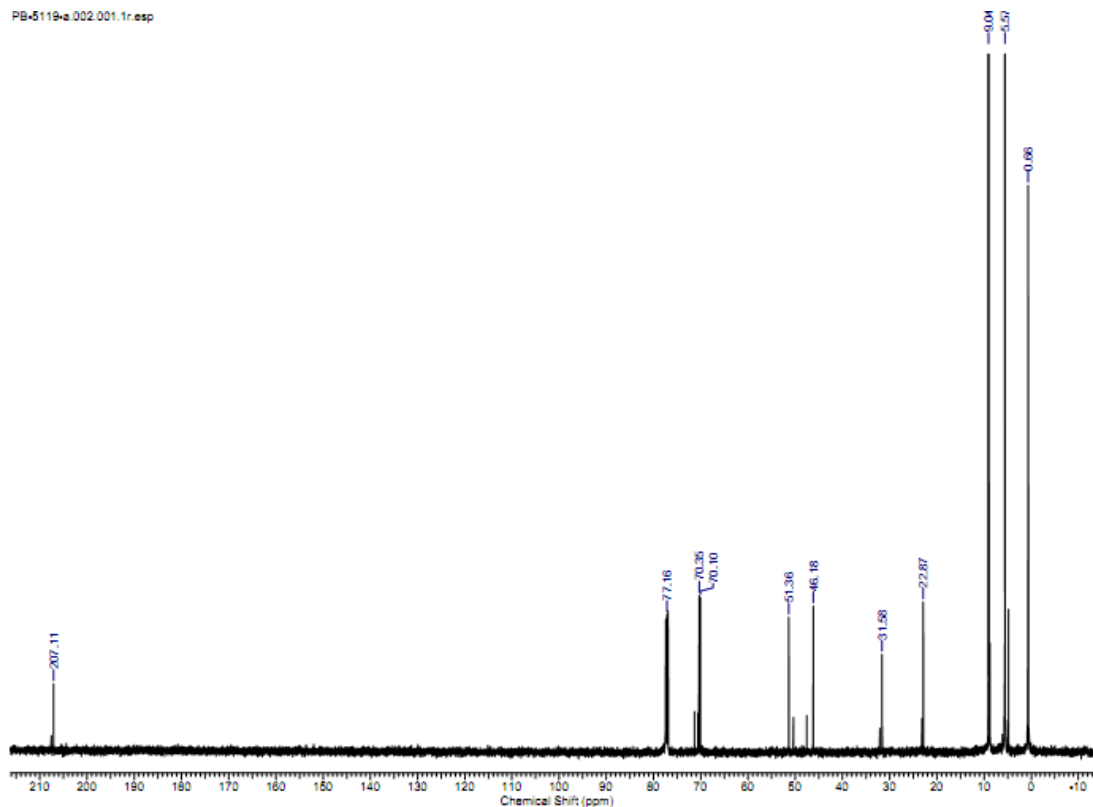

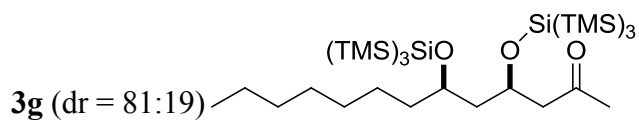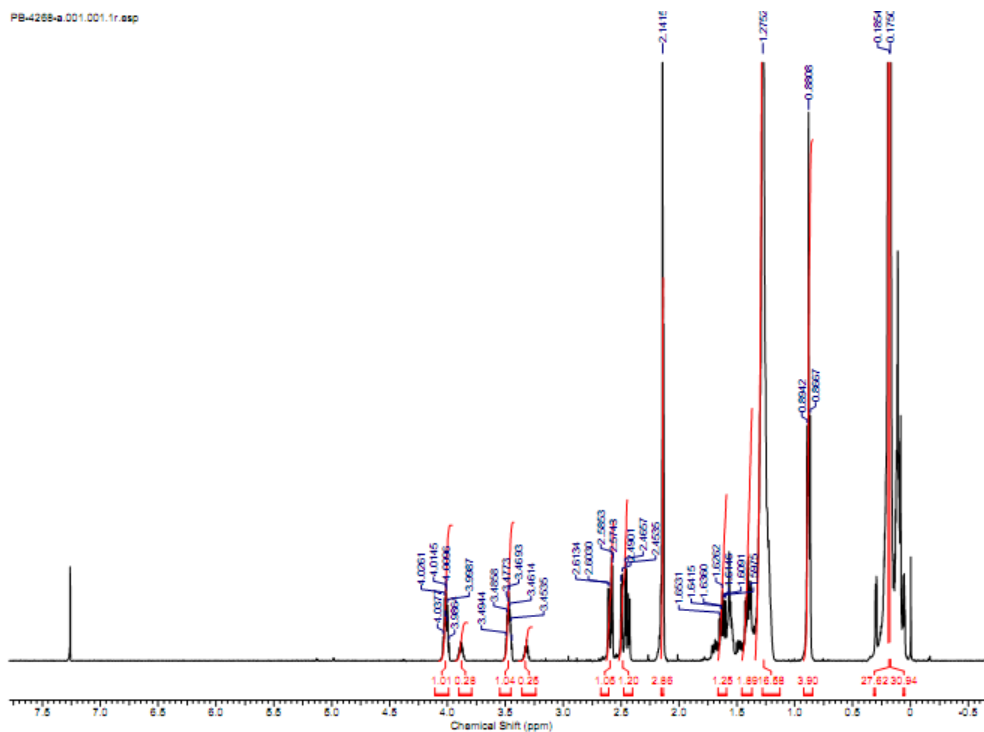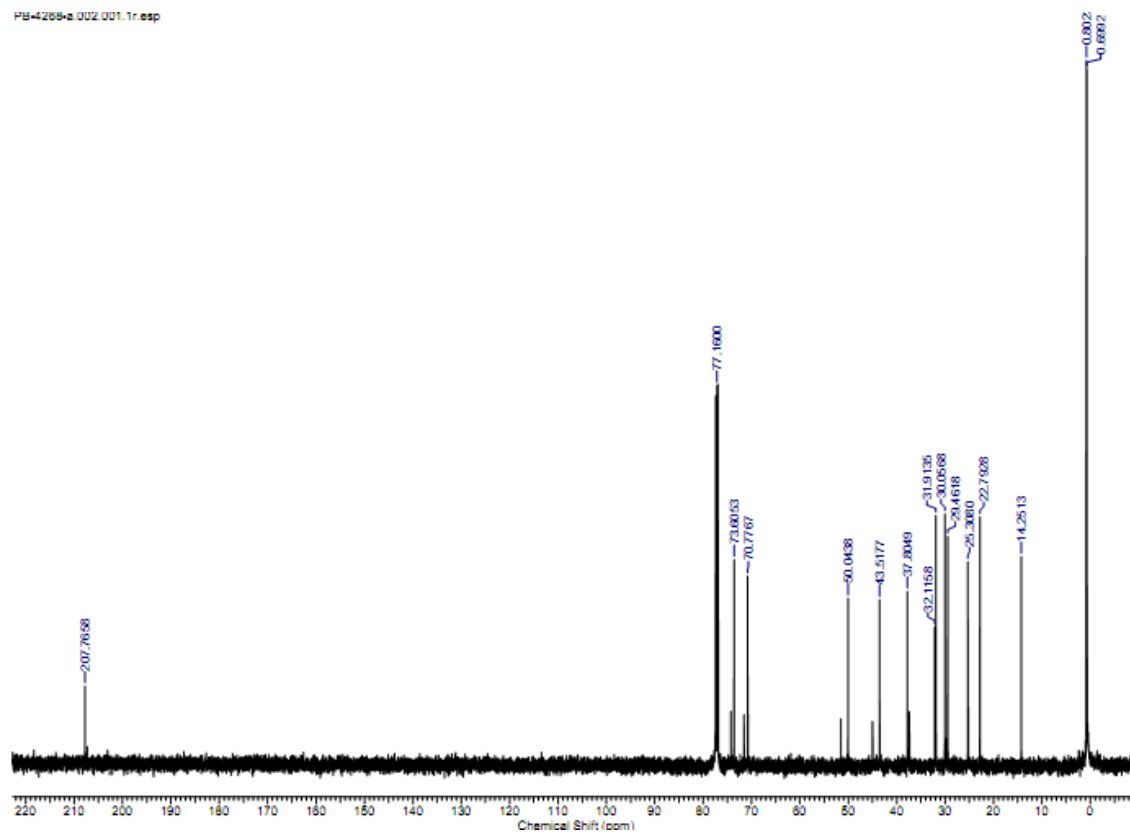



3i

PB-5118D-a.002.001.1r.esp

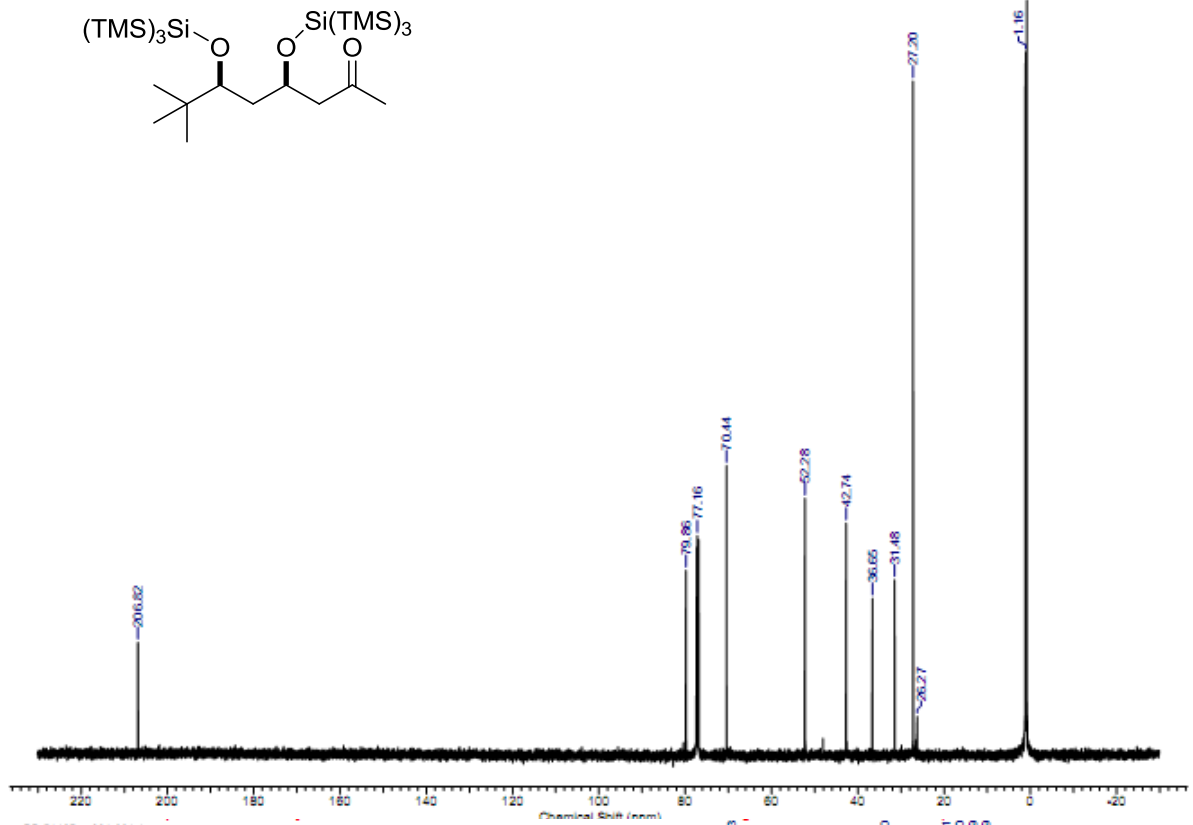

PB-5118D-a.001.001.1r.esp

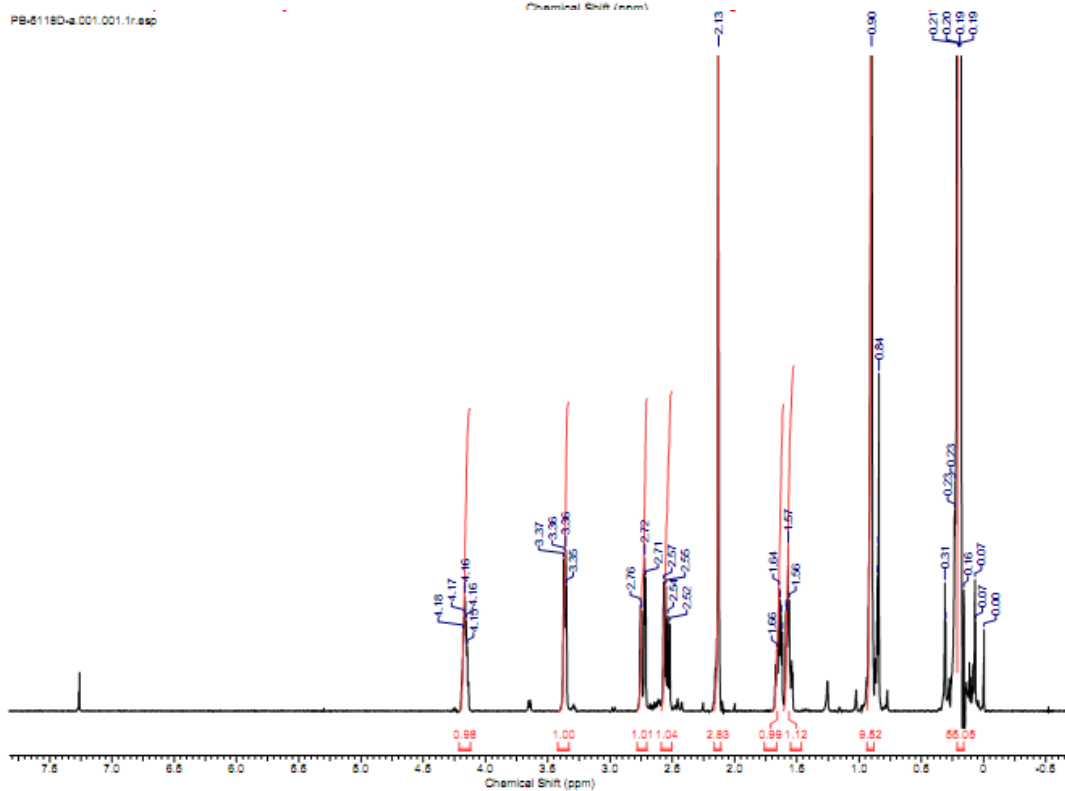

3j

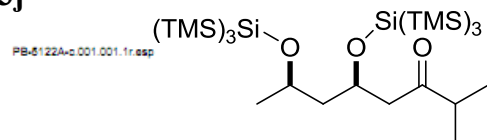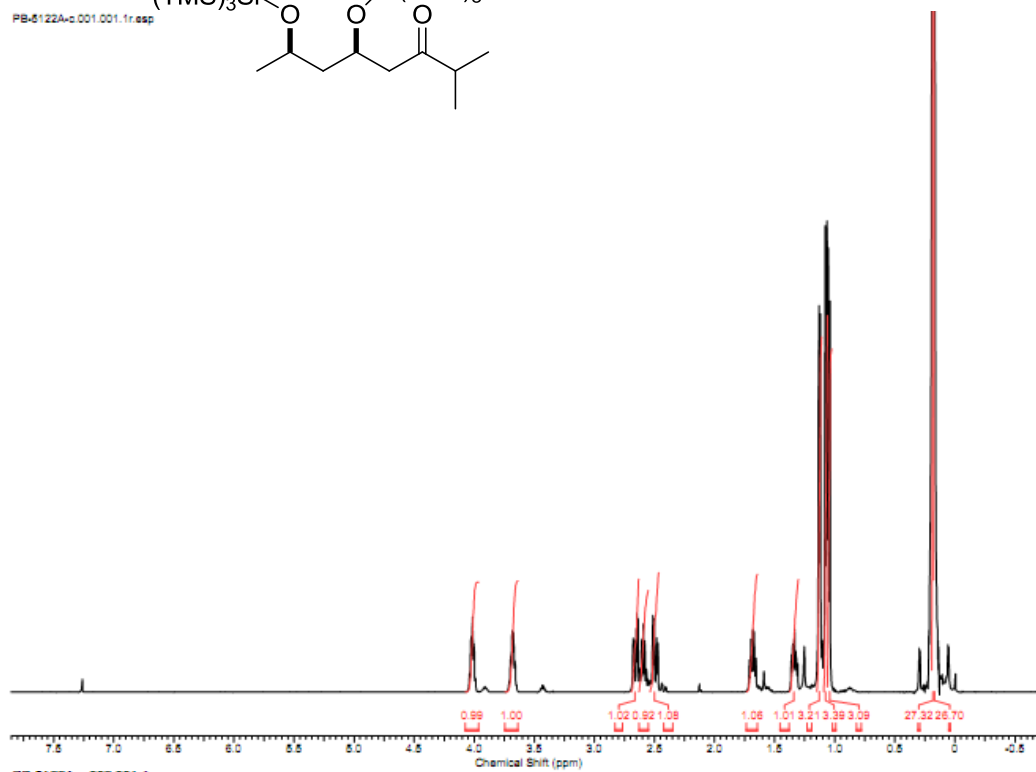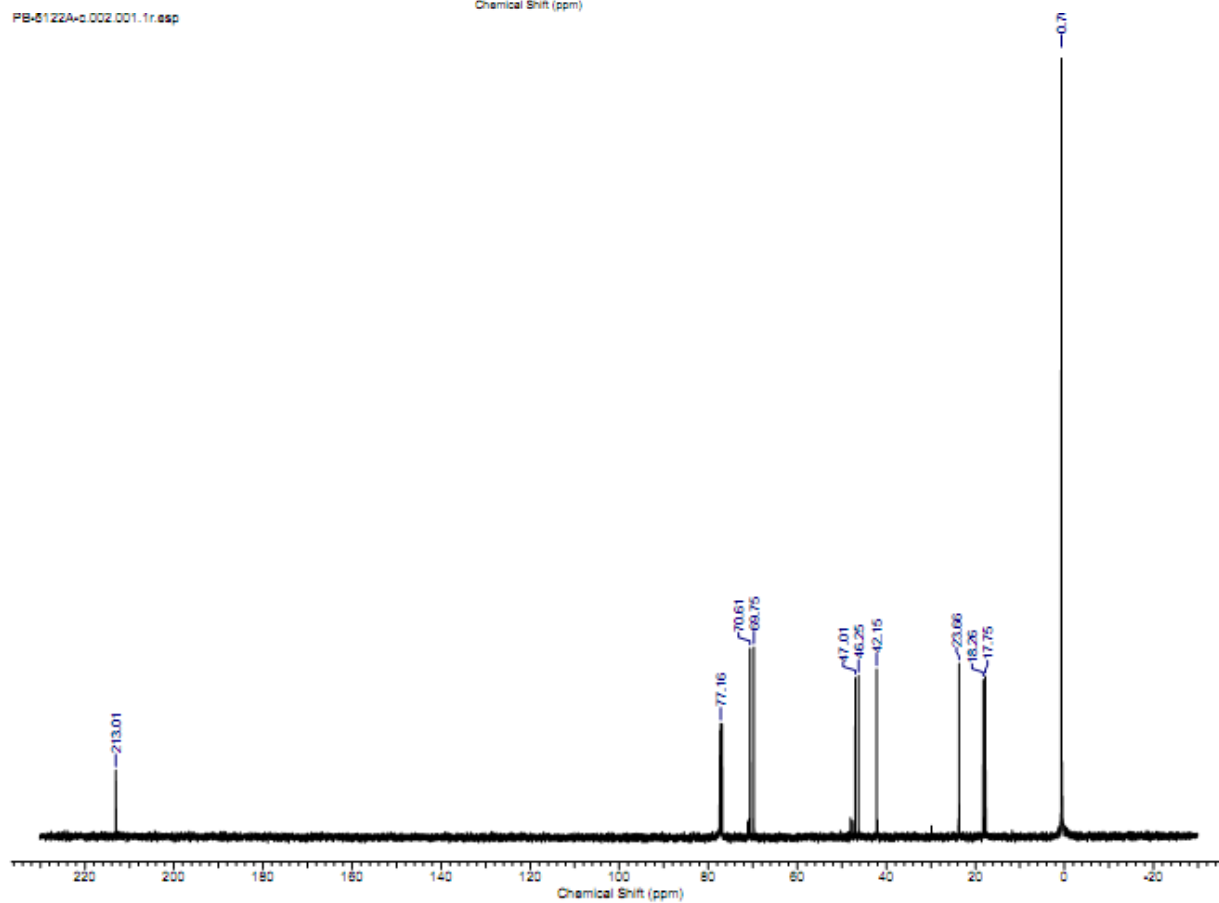

### 3k

PB-5122B-a.001.001.1r.esp

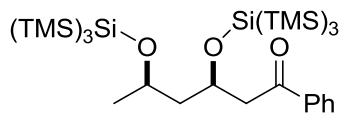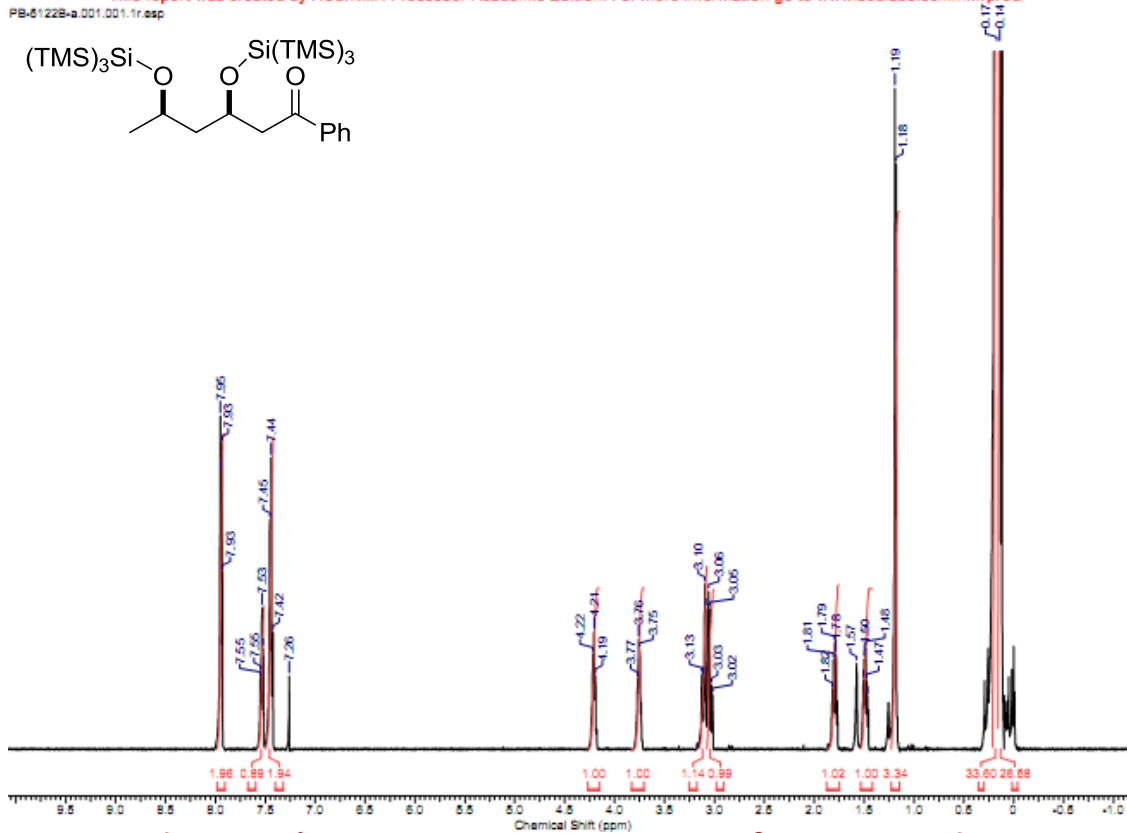

PB-5122B-a.002.001.1r.esp

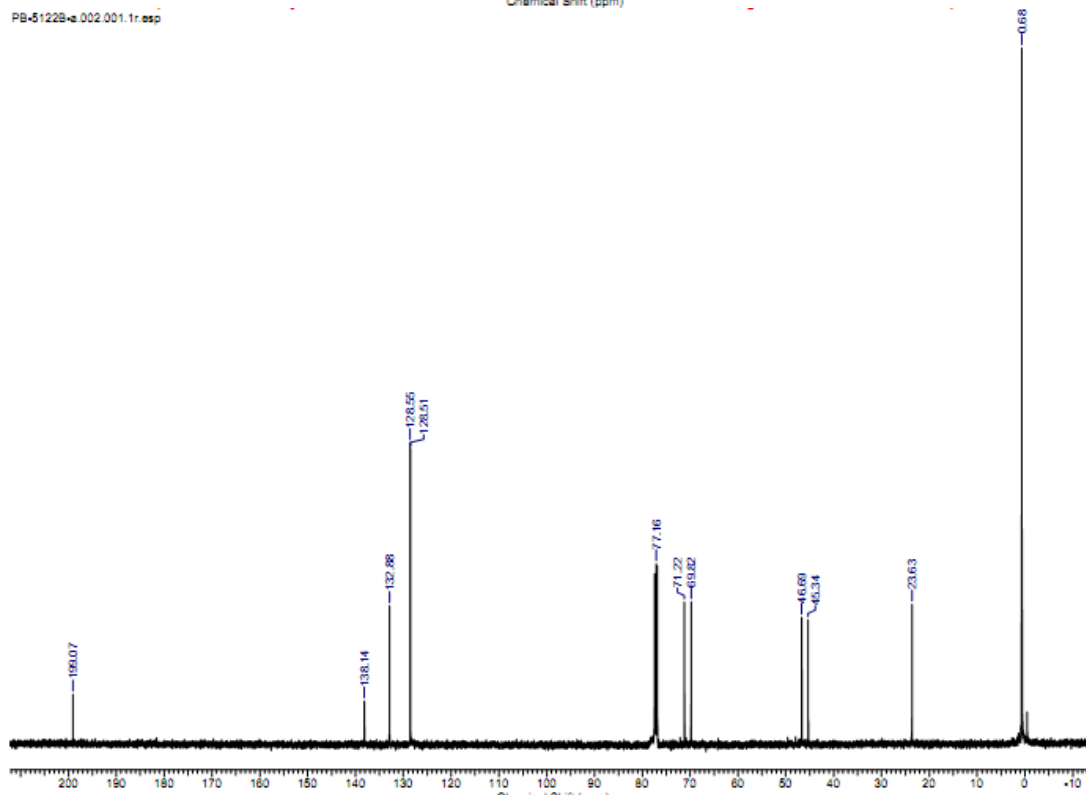

31

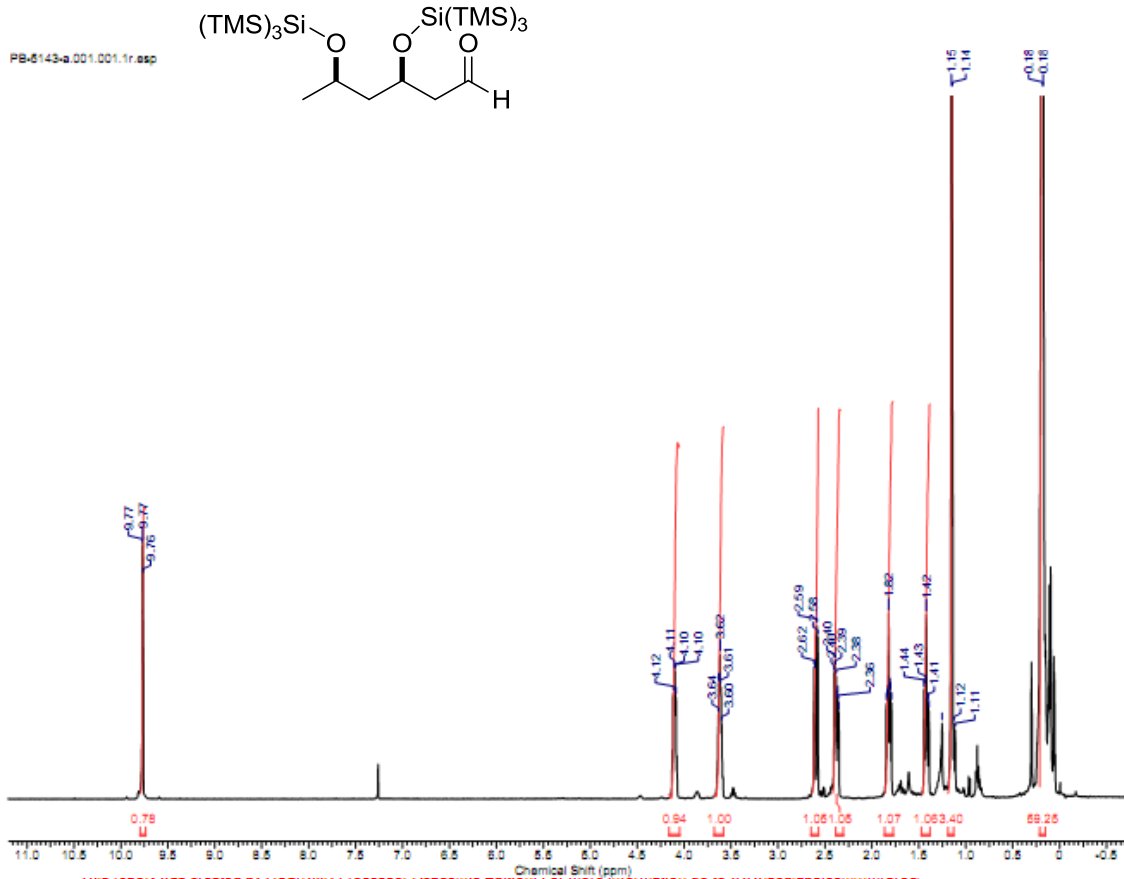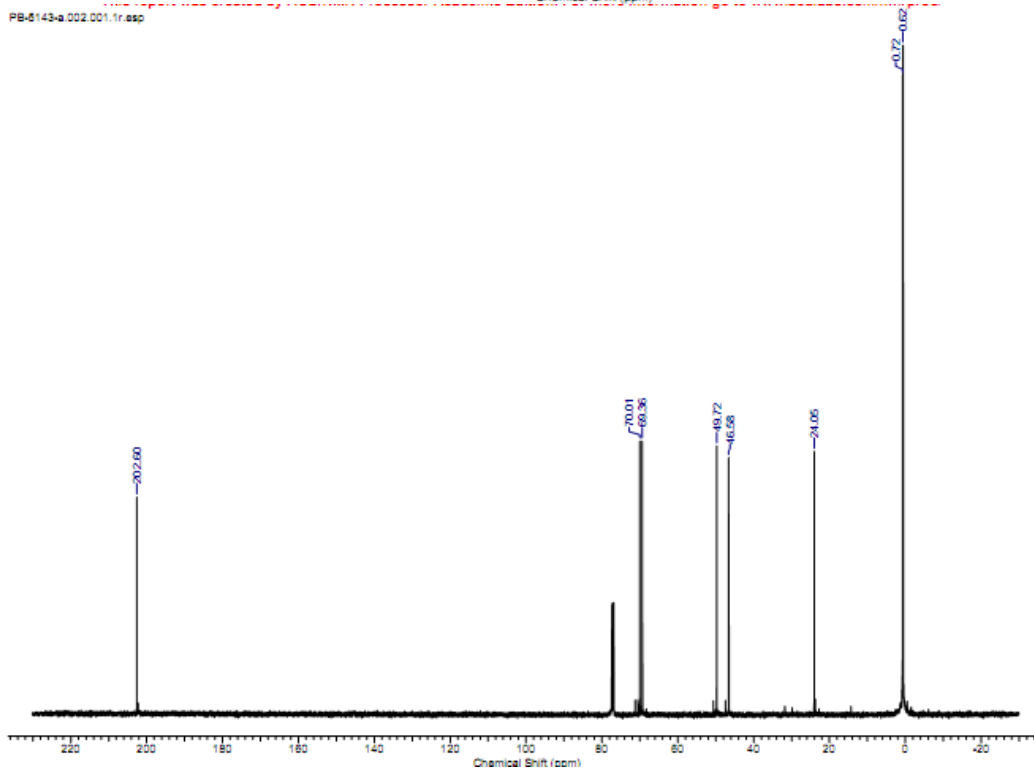



5a (dr = 74:26)

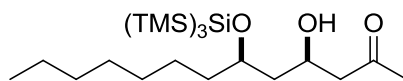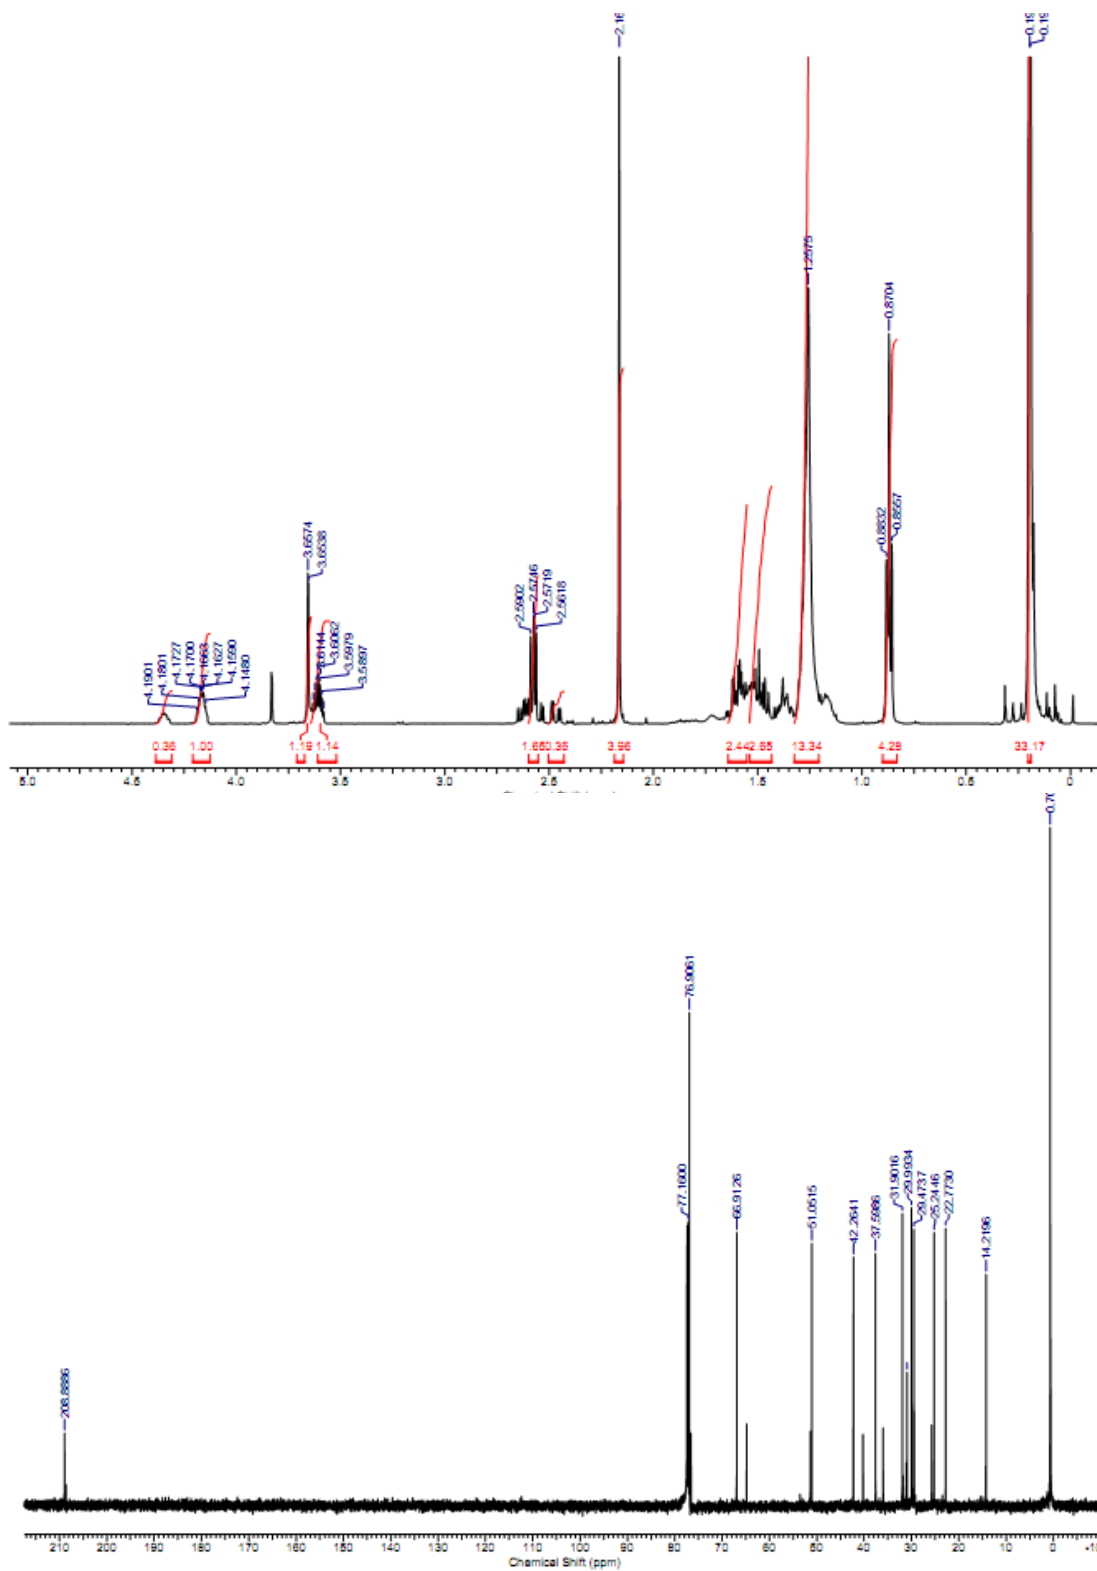

**5i**

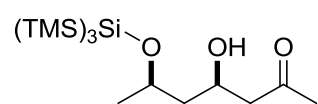



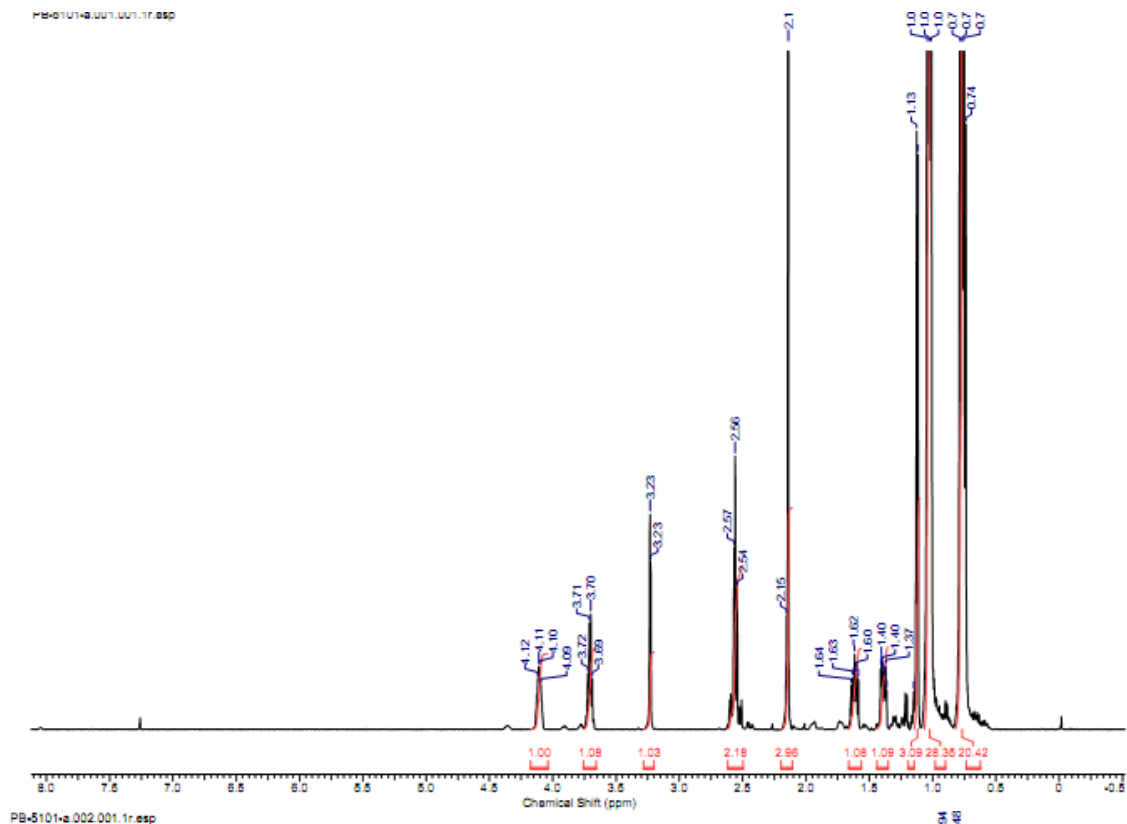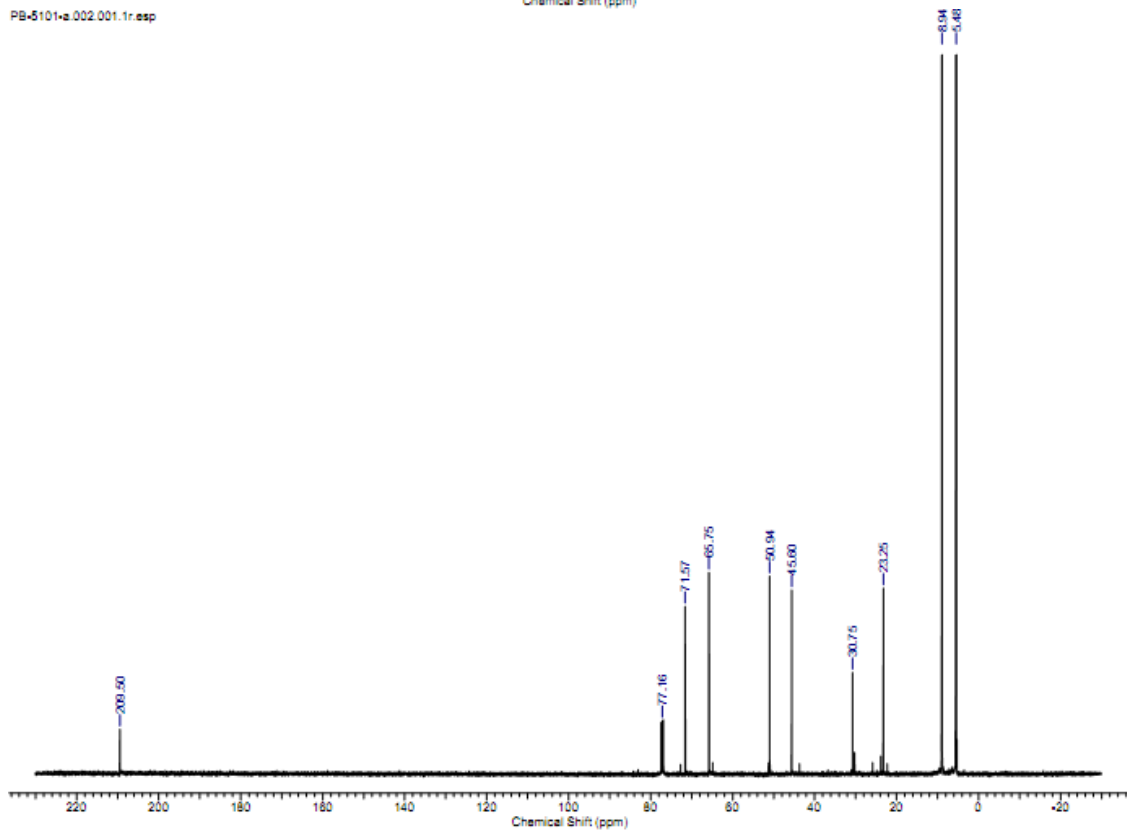

5m

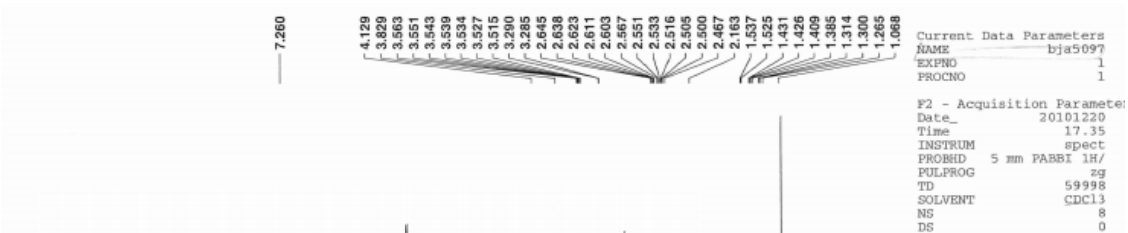

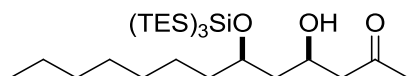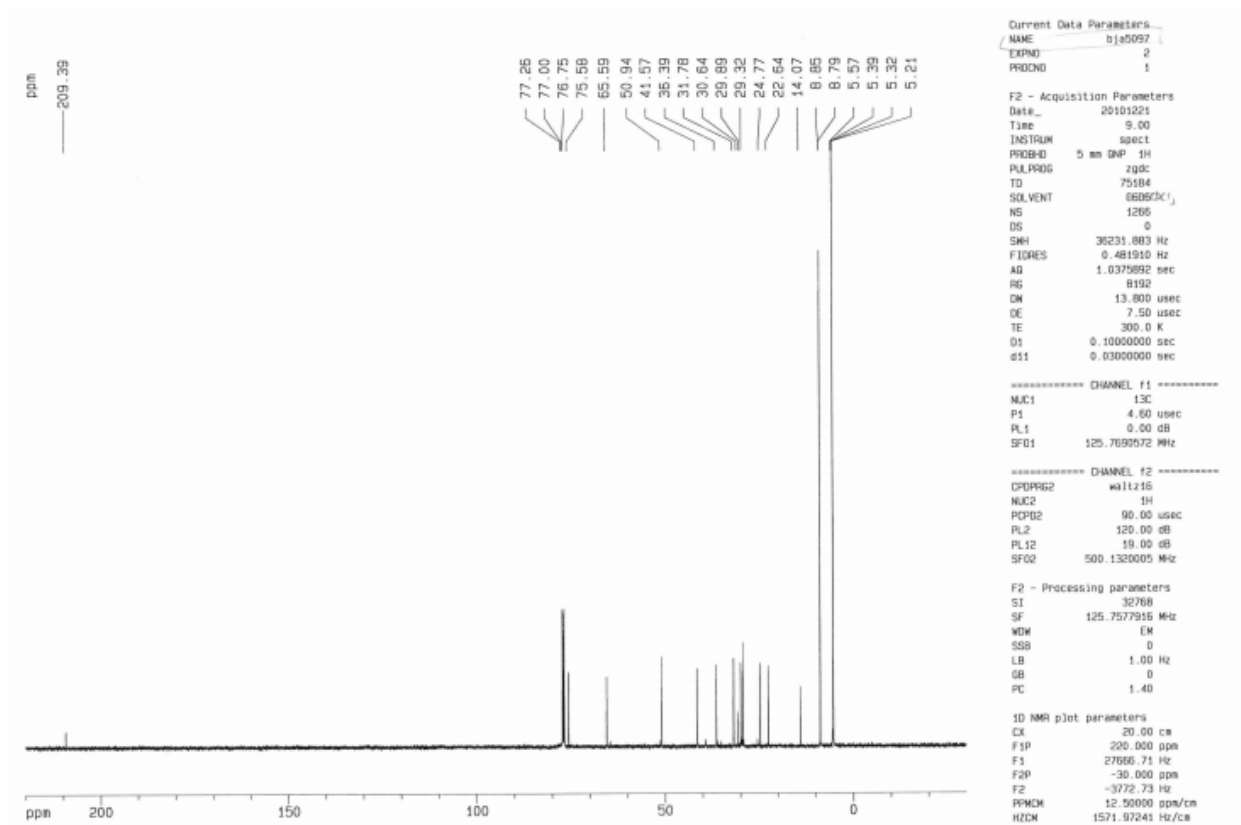

**5n** (mixture of diastereomers)



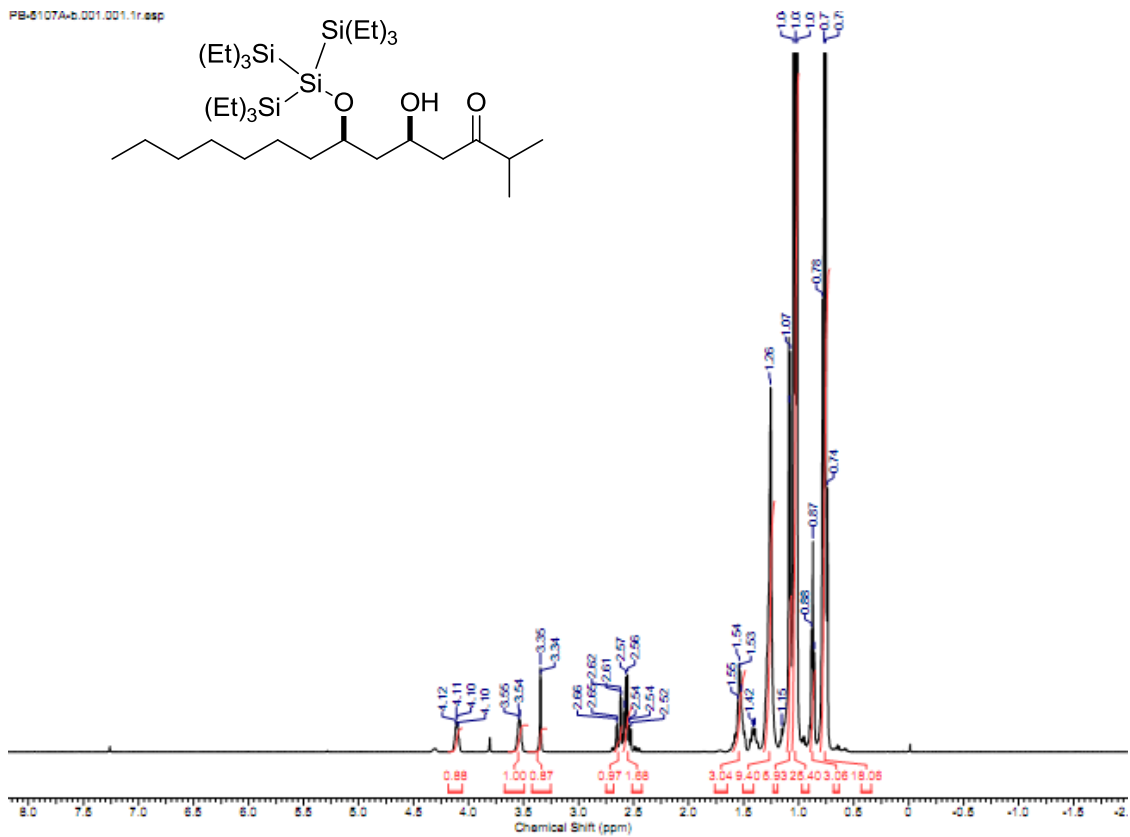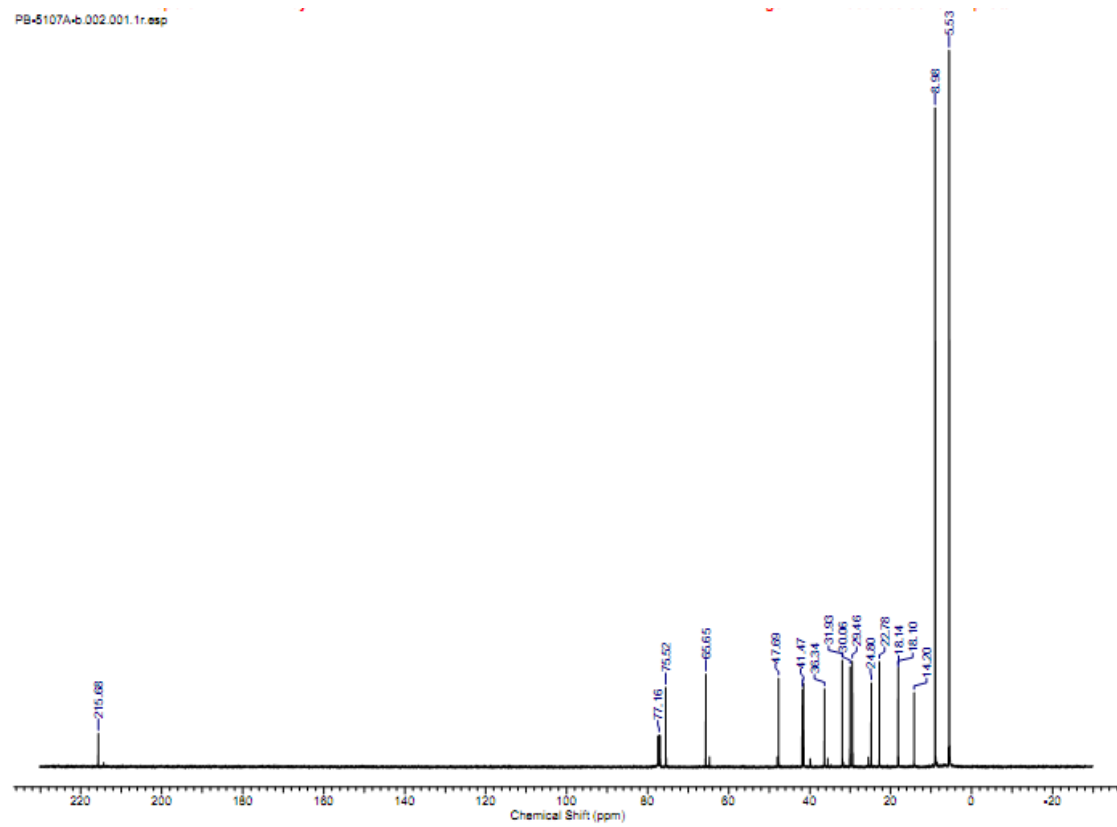

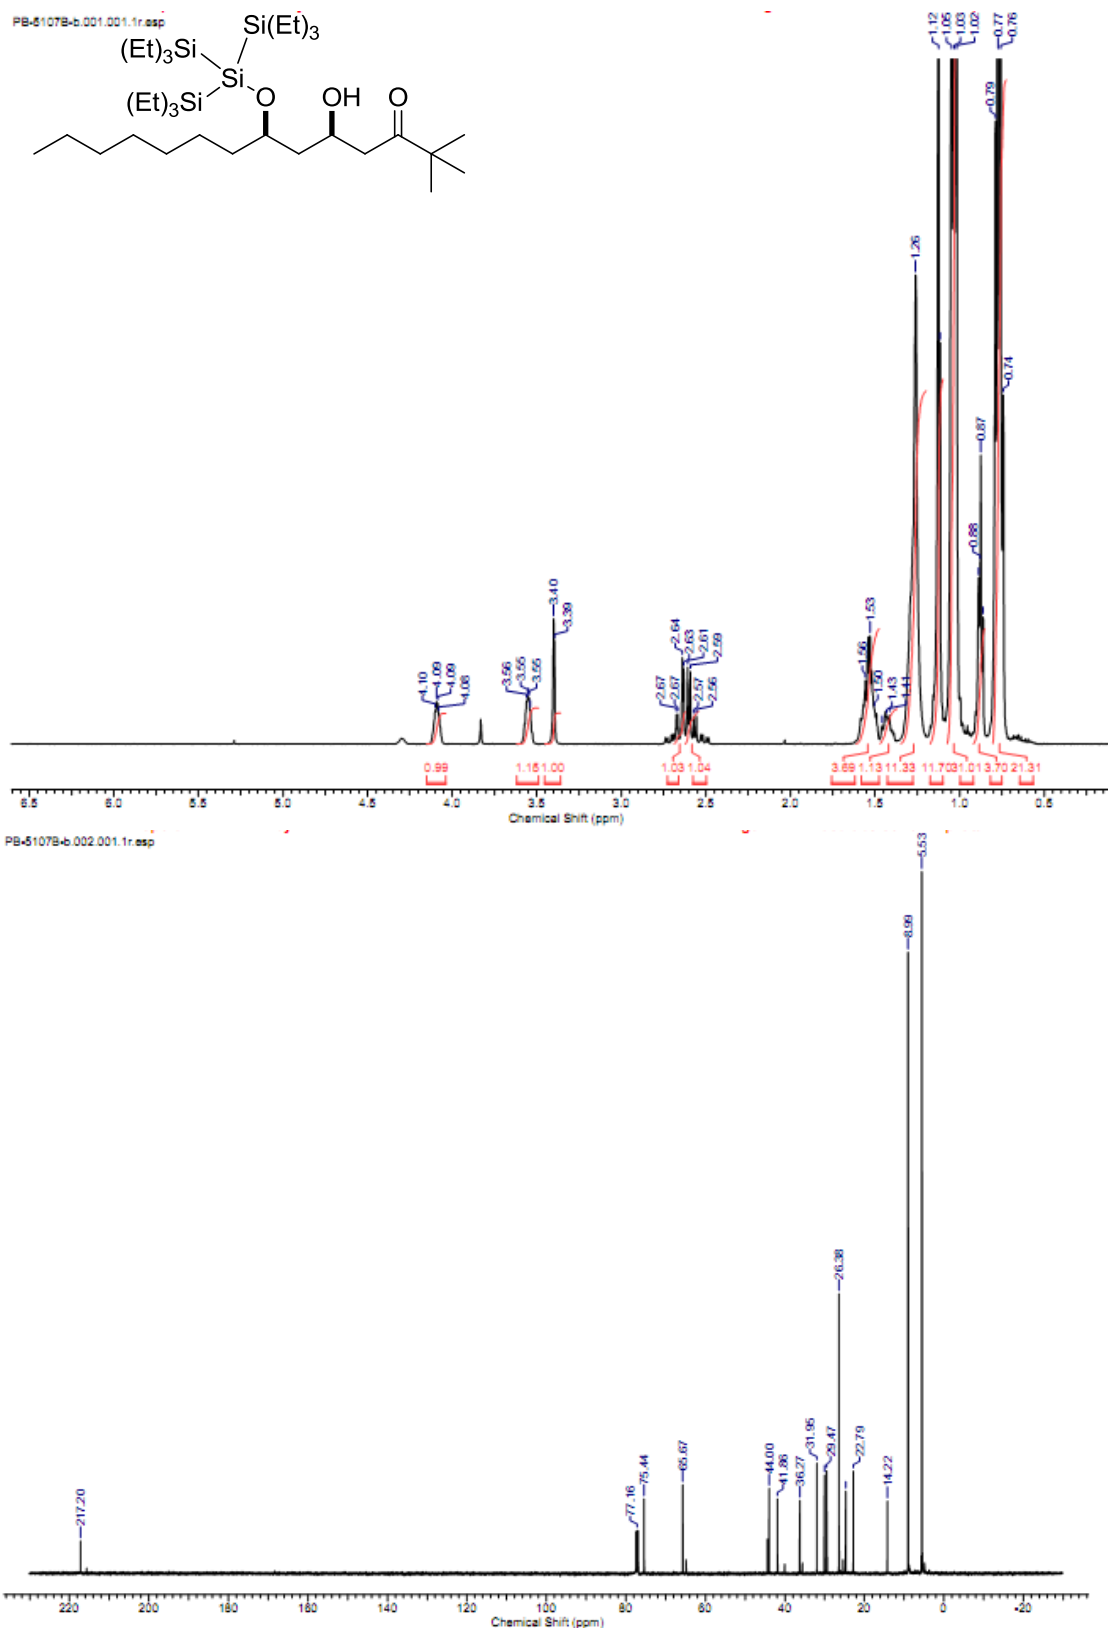

5q

S104



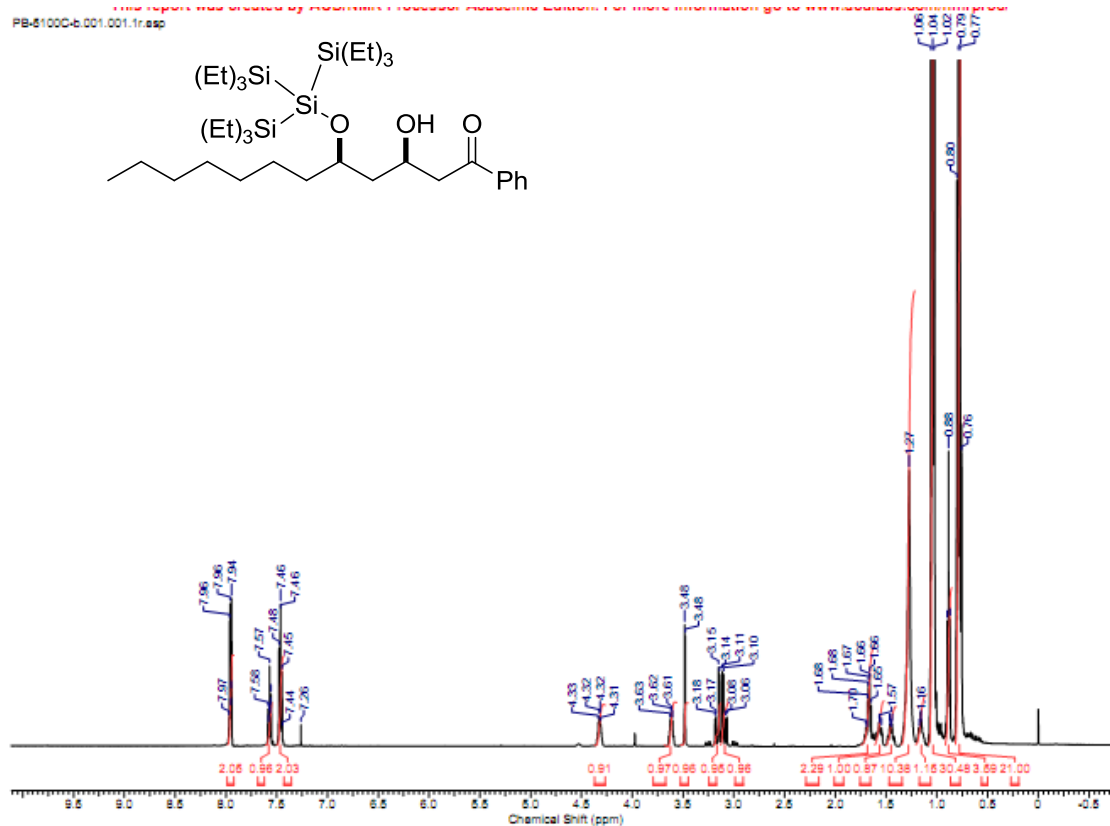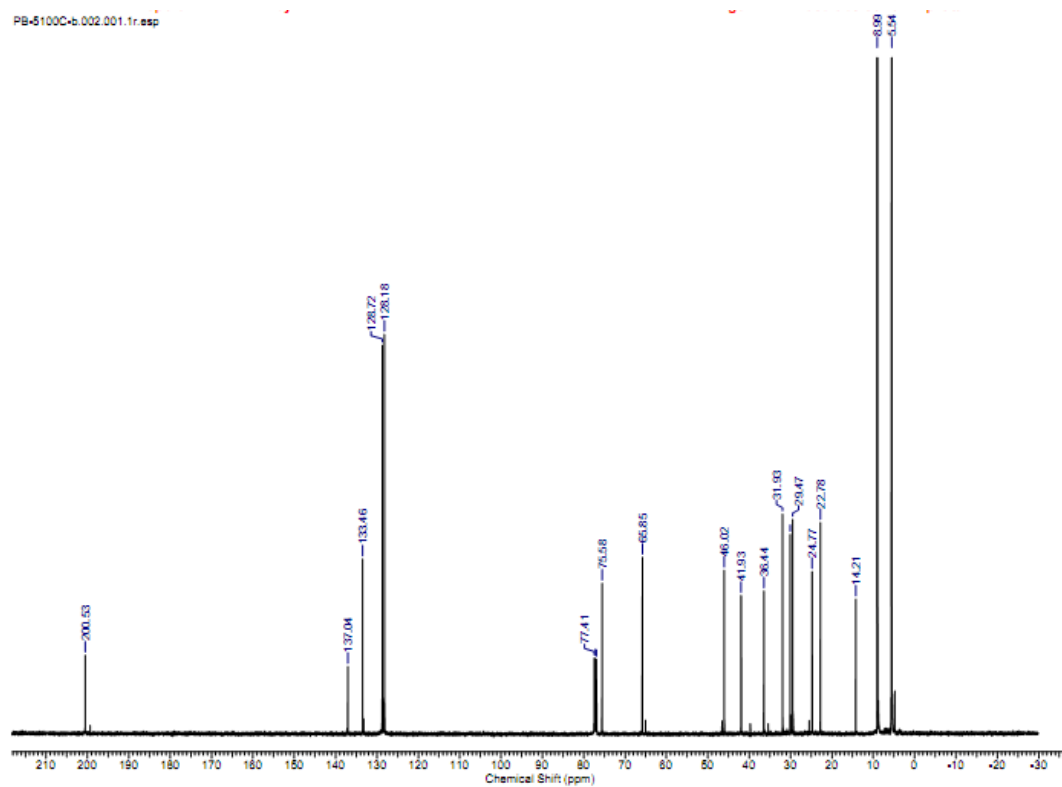

5r



6a

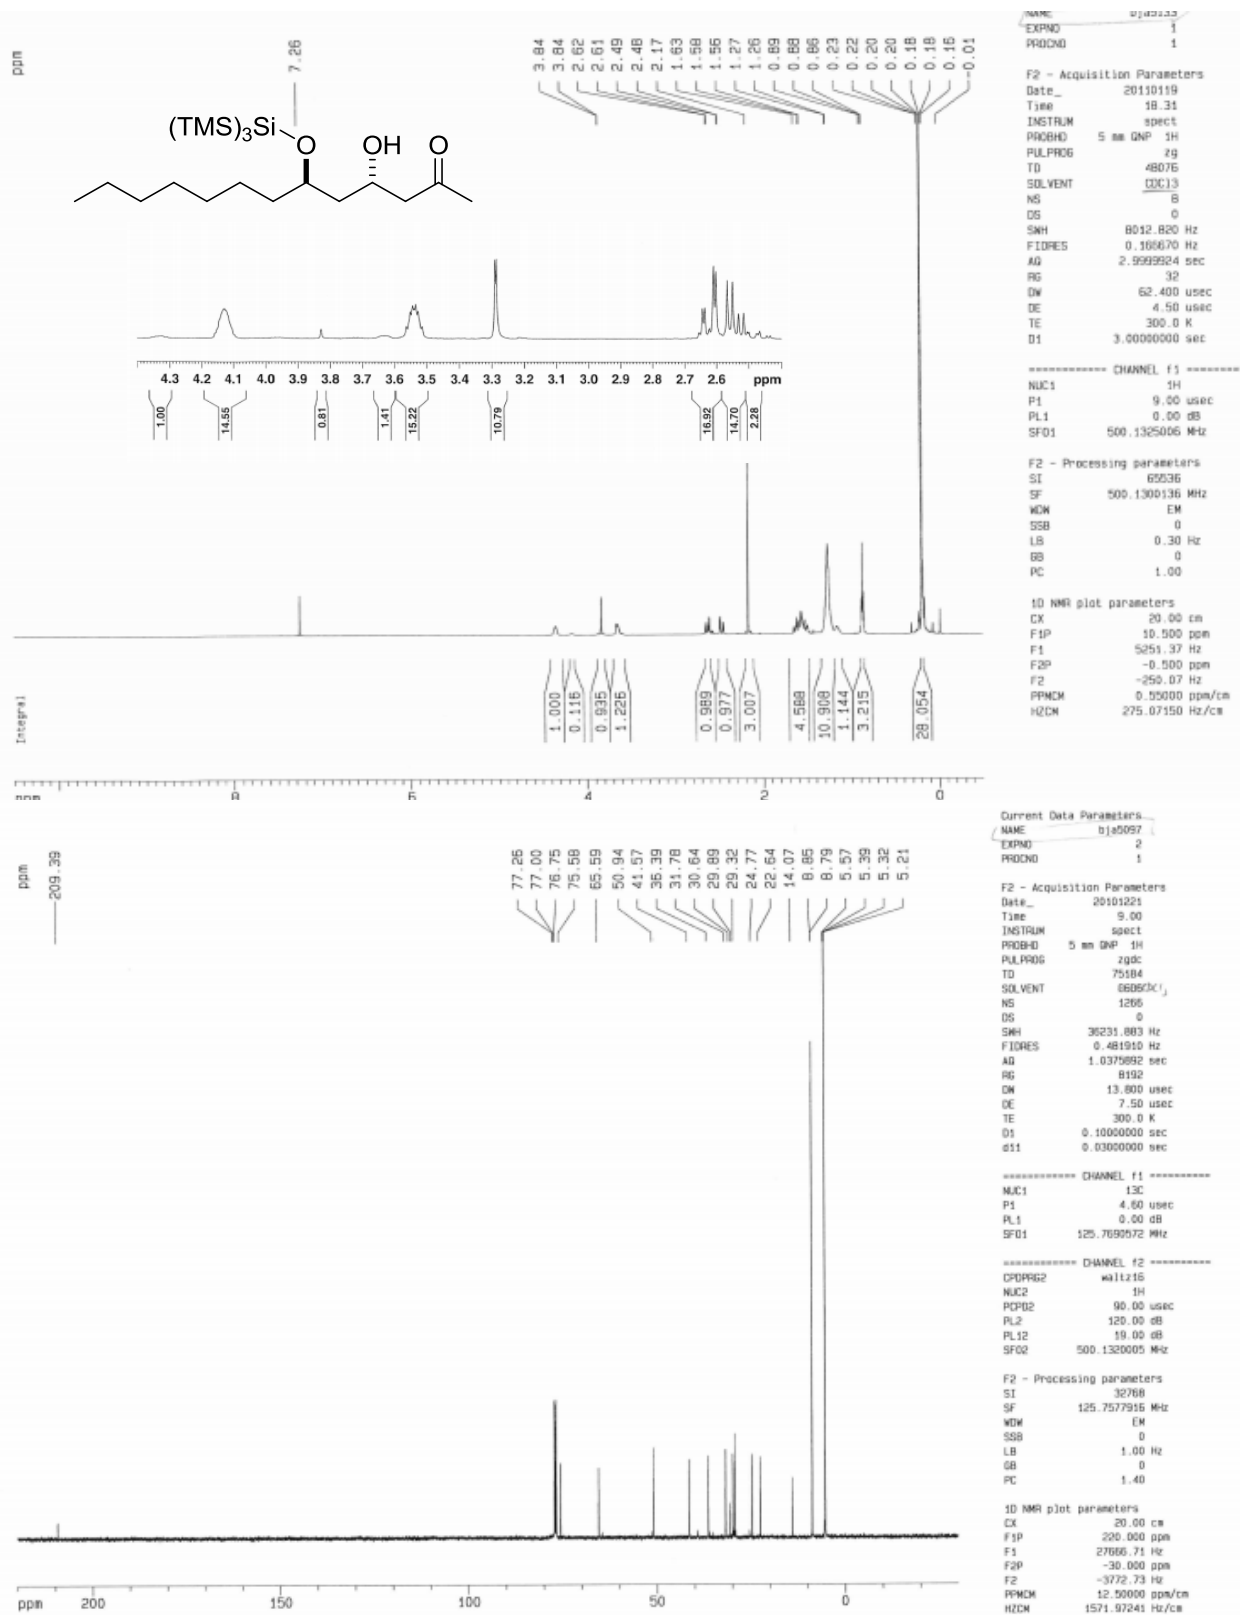

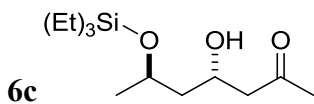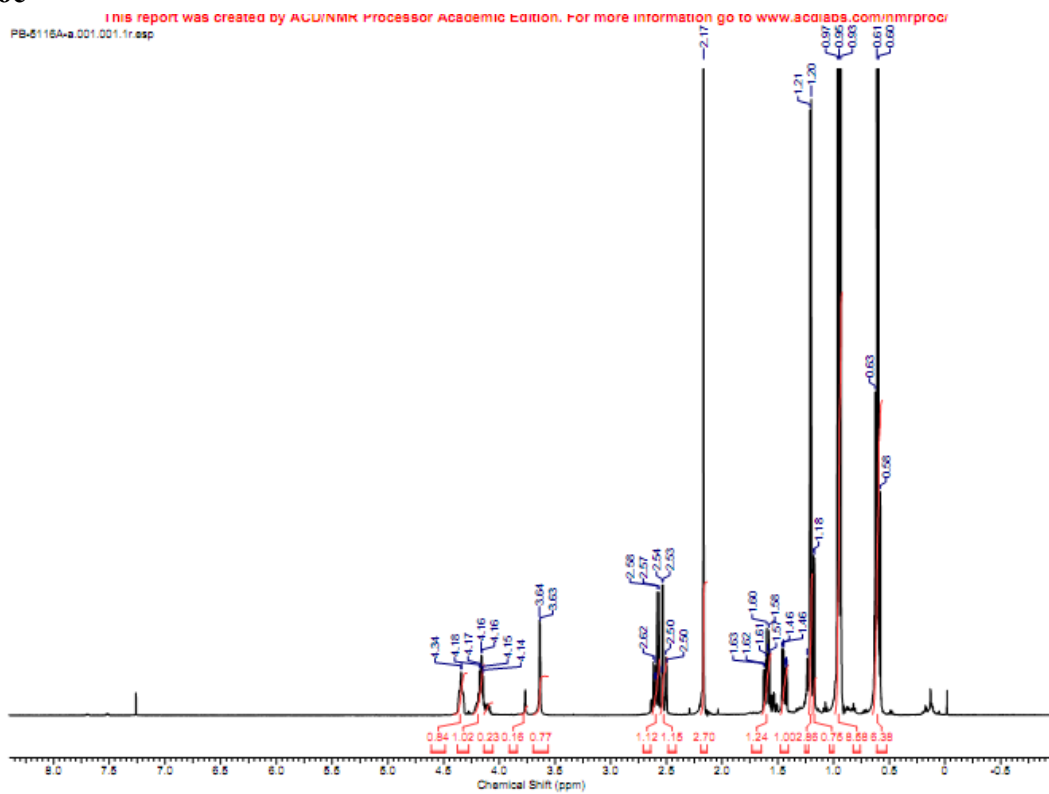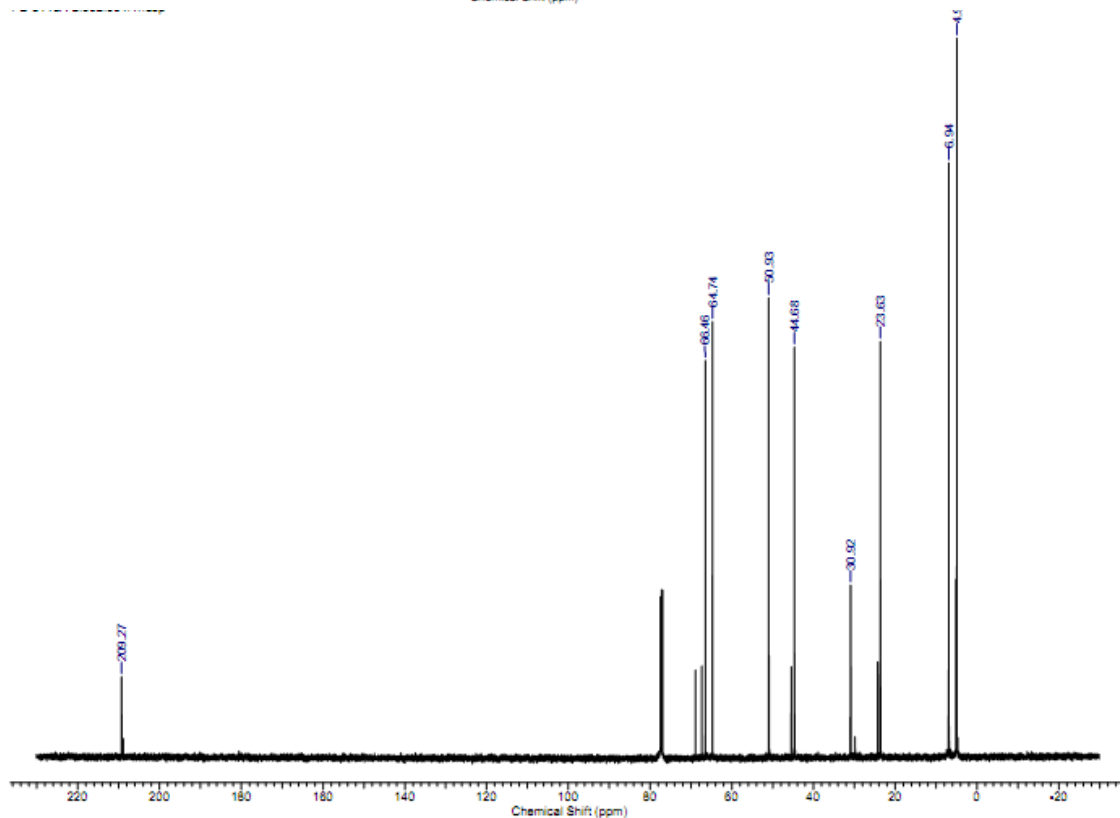

### 6d (mixture of diastereomers)

PB-51168-a.001.001.1r.esp

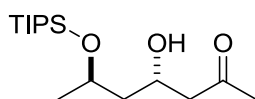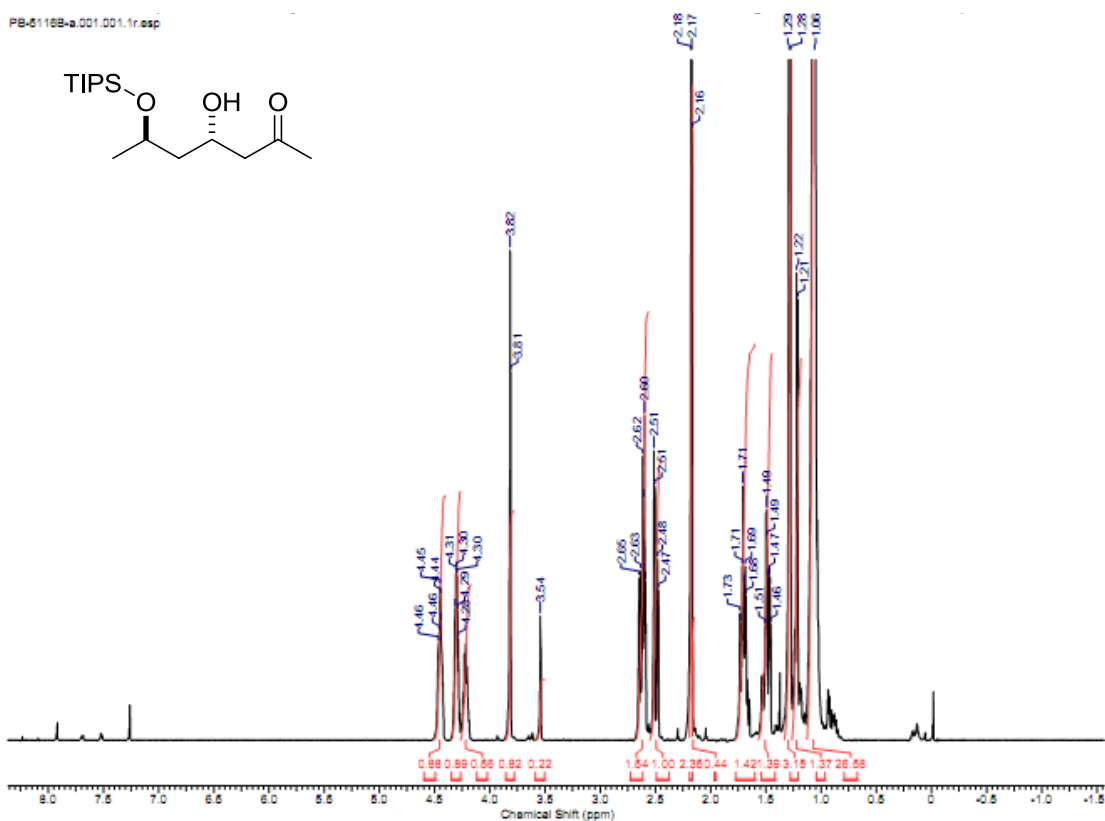

PB-51168-a.002.001.1r.esp

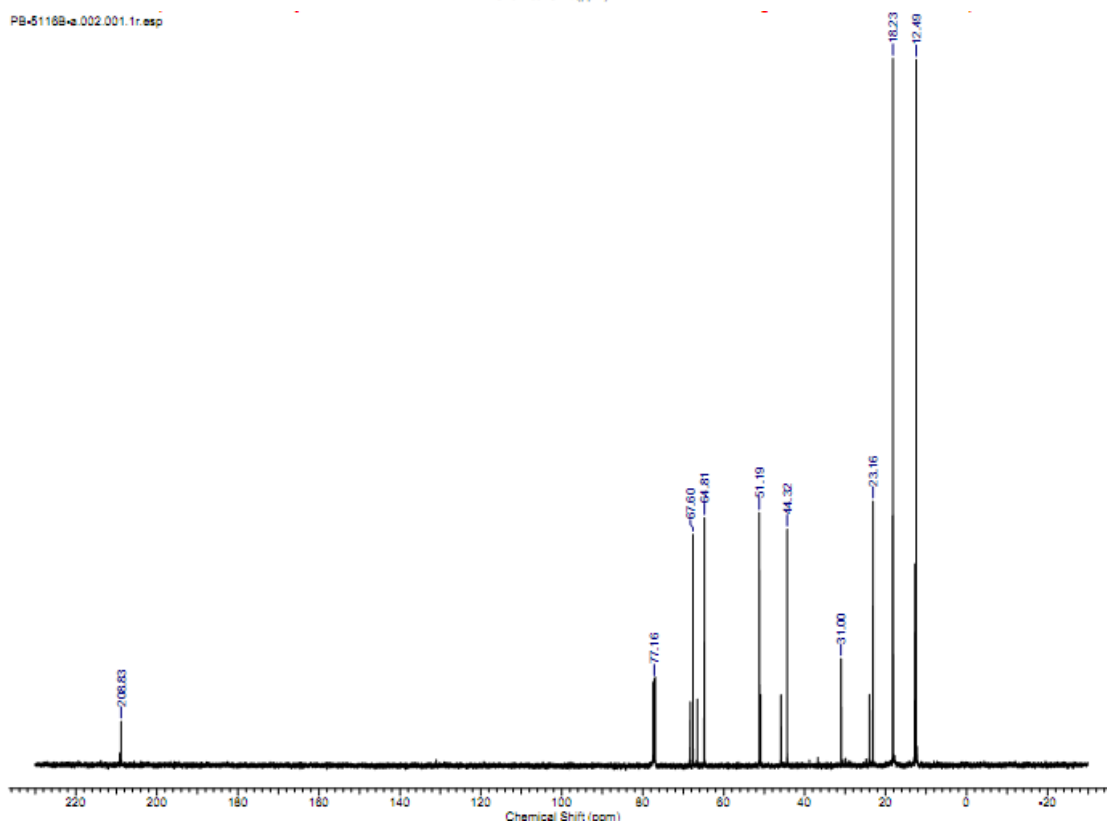

6e

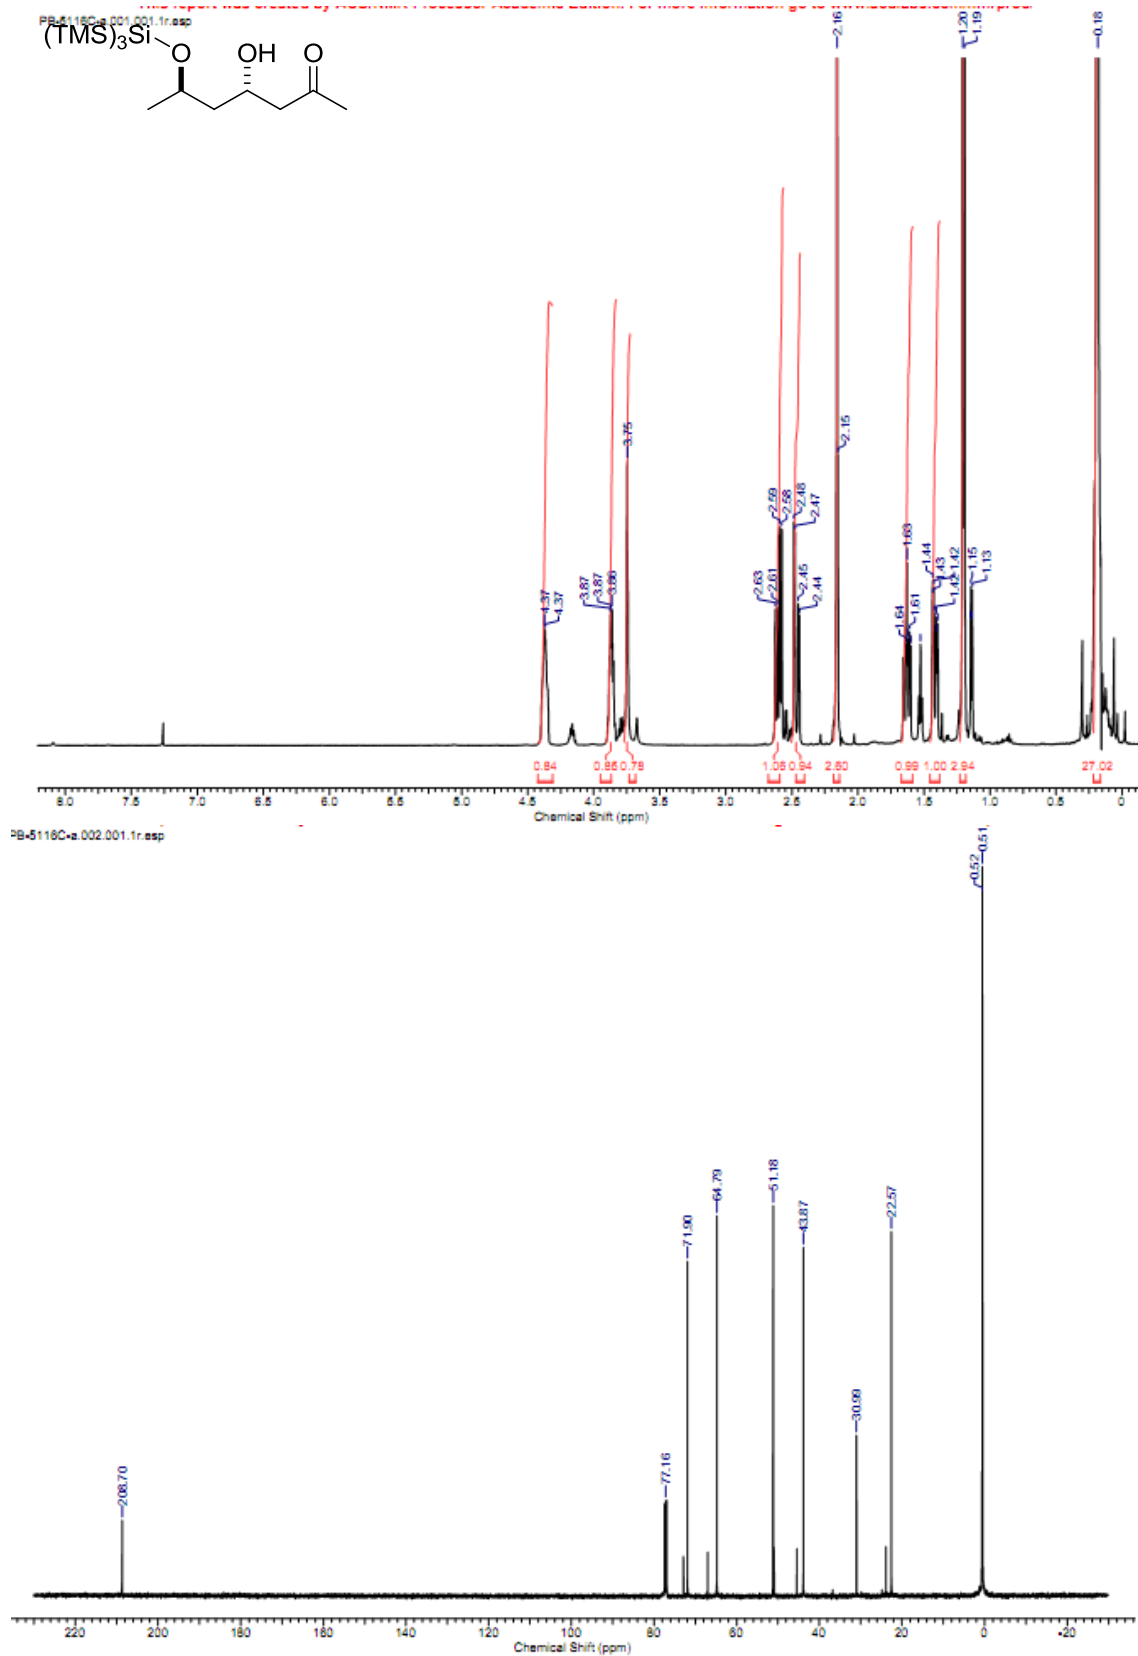

**6f** (mixture of diastereomers)

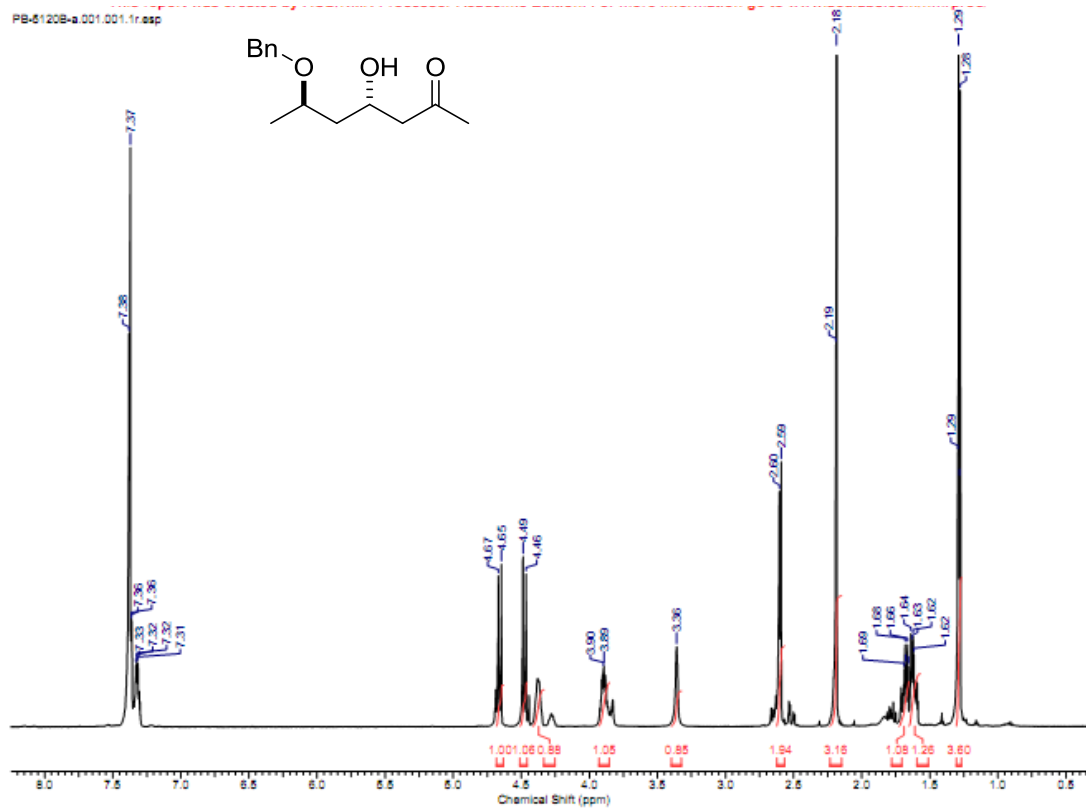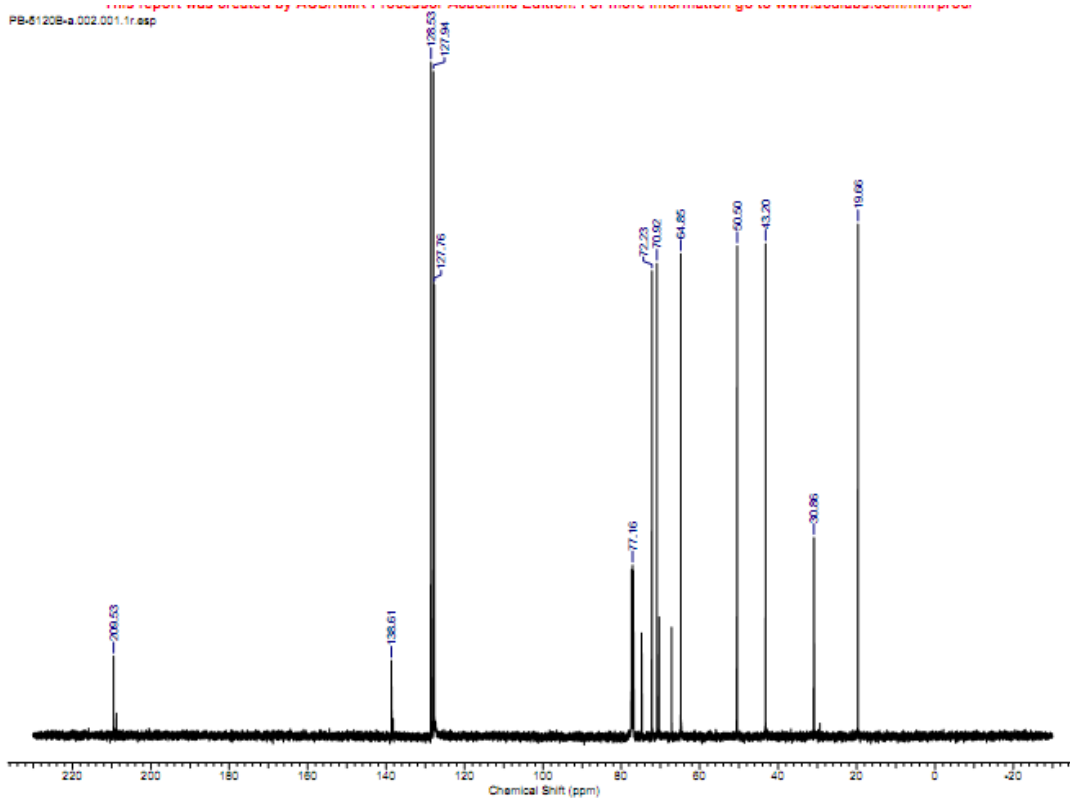

6g

PB-5123-a.001.001.1r.esp

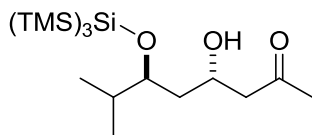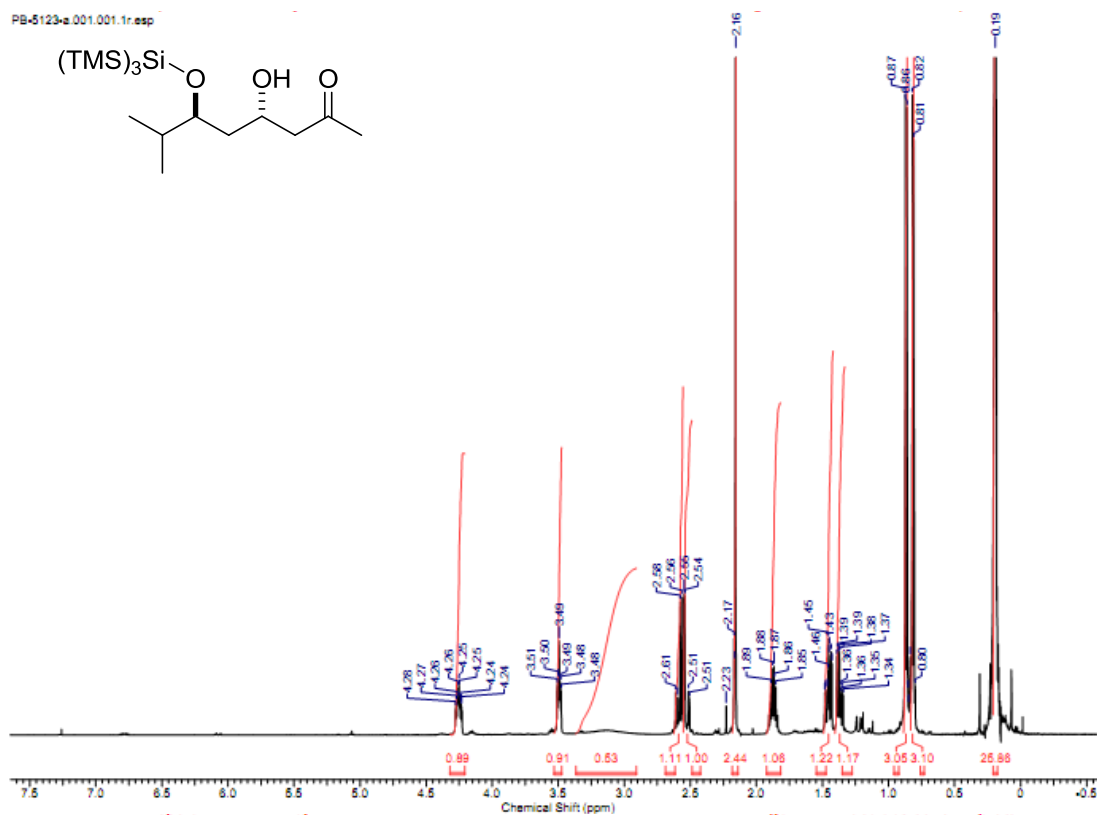

PB-5123-a.002.001.1r.esp

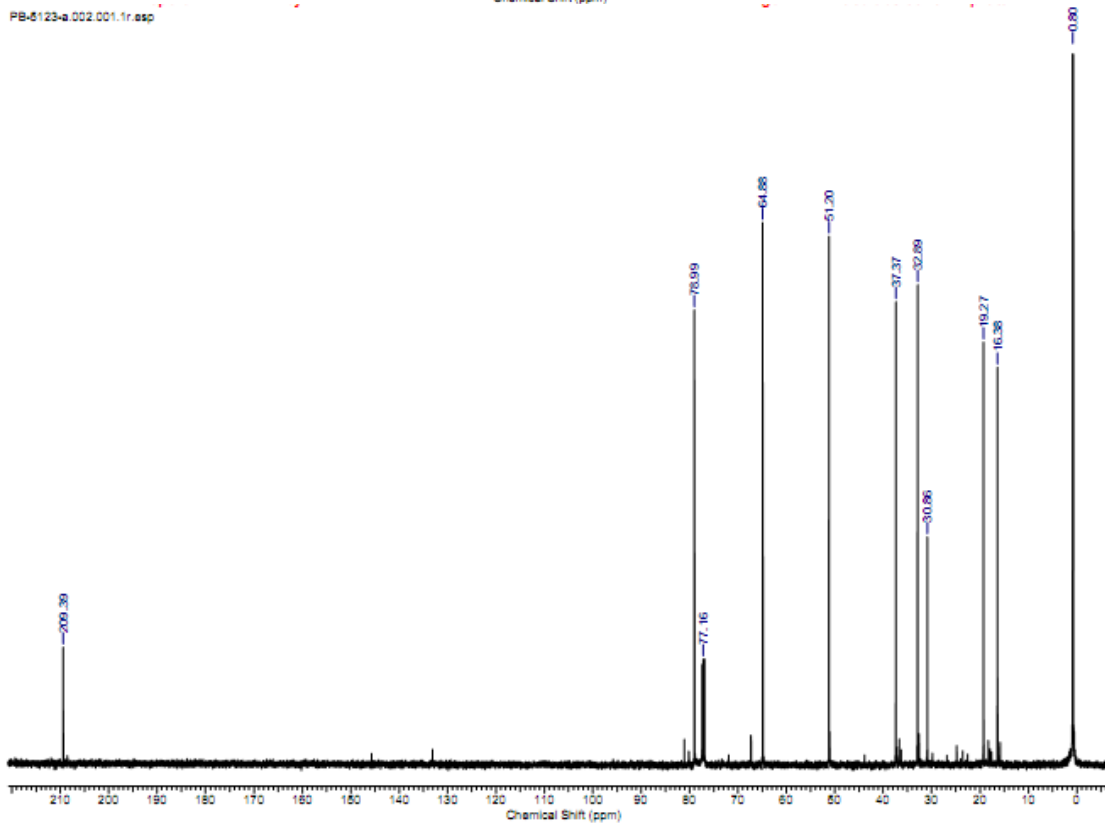



6h

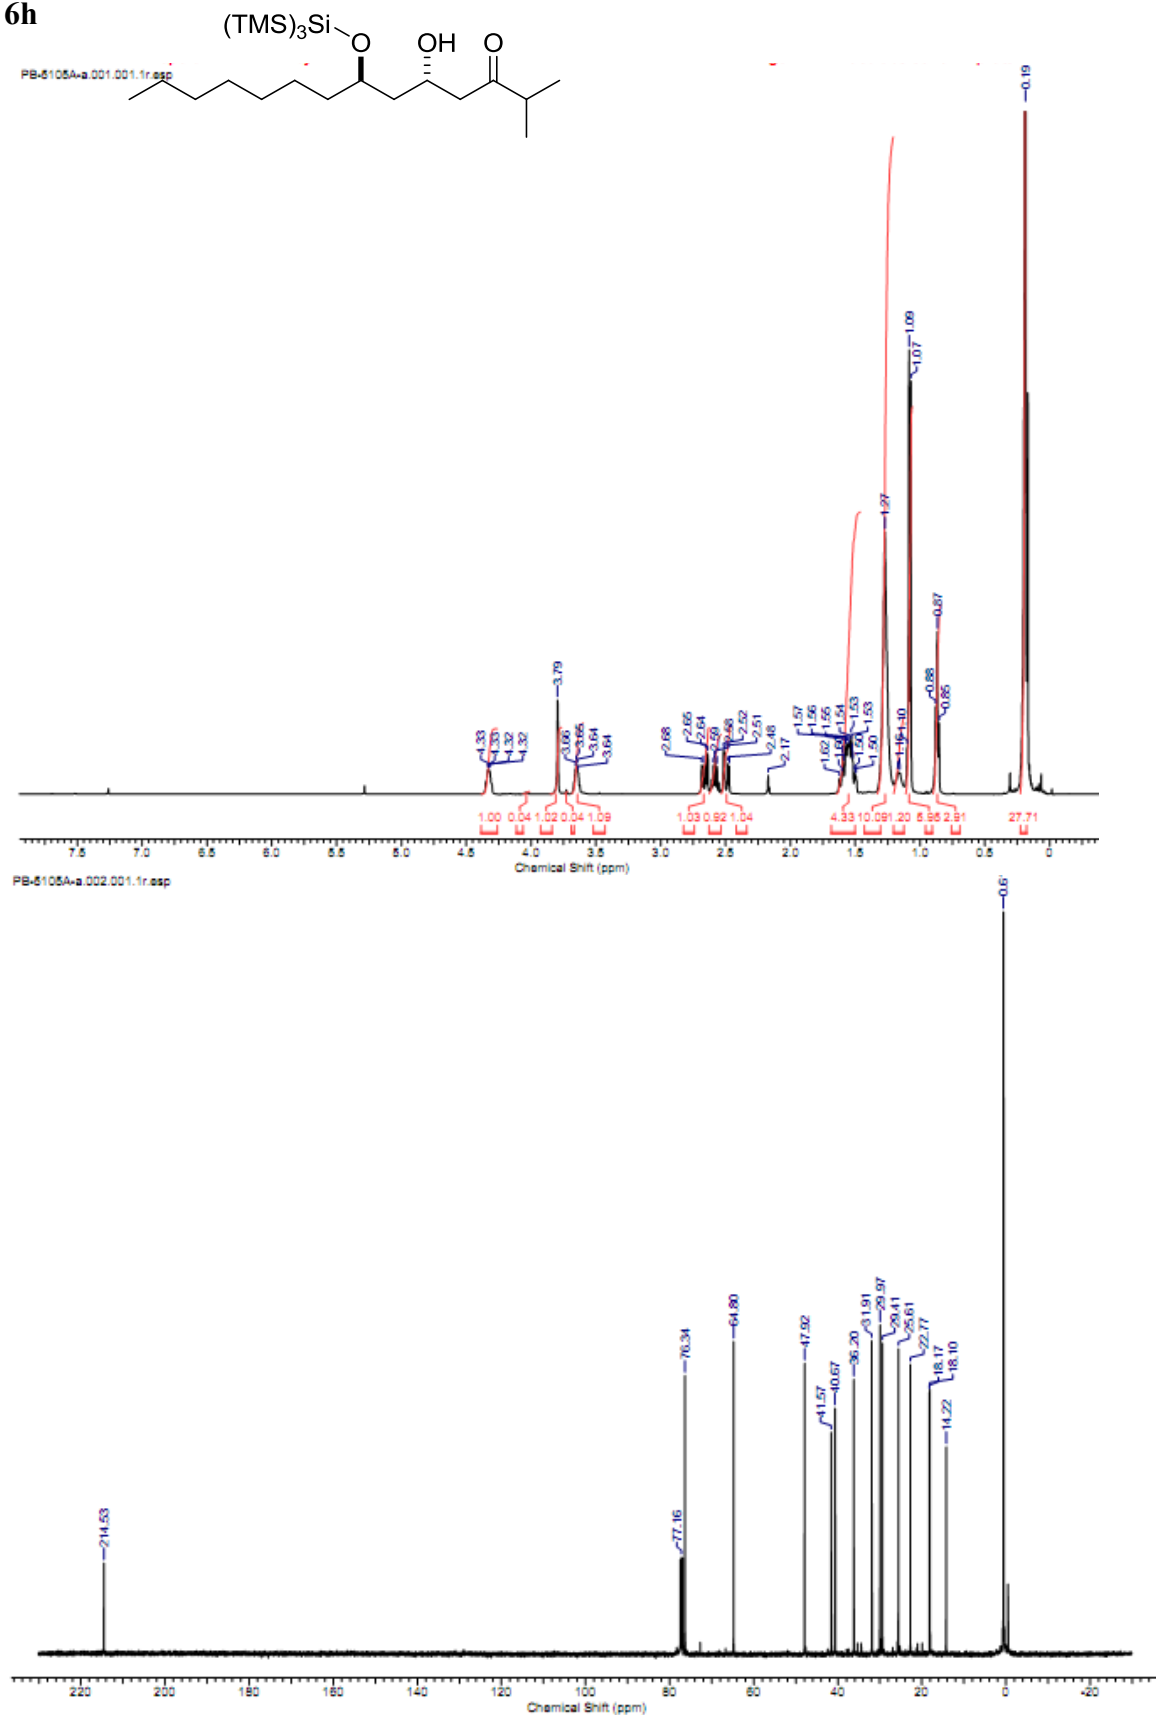

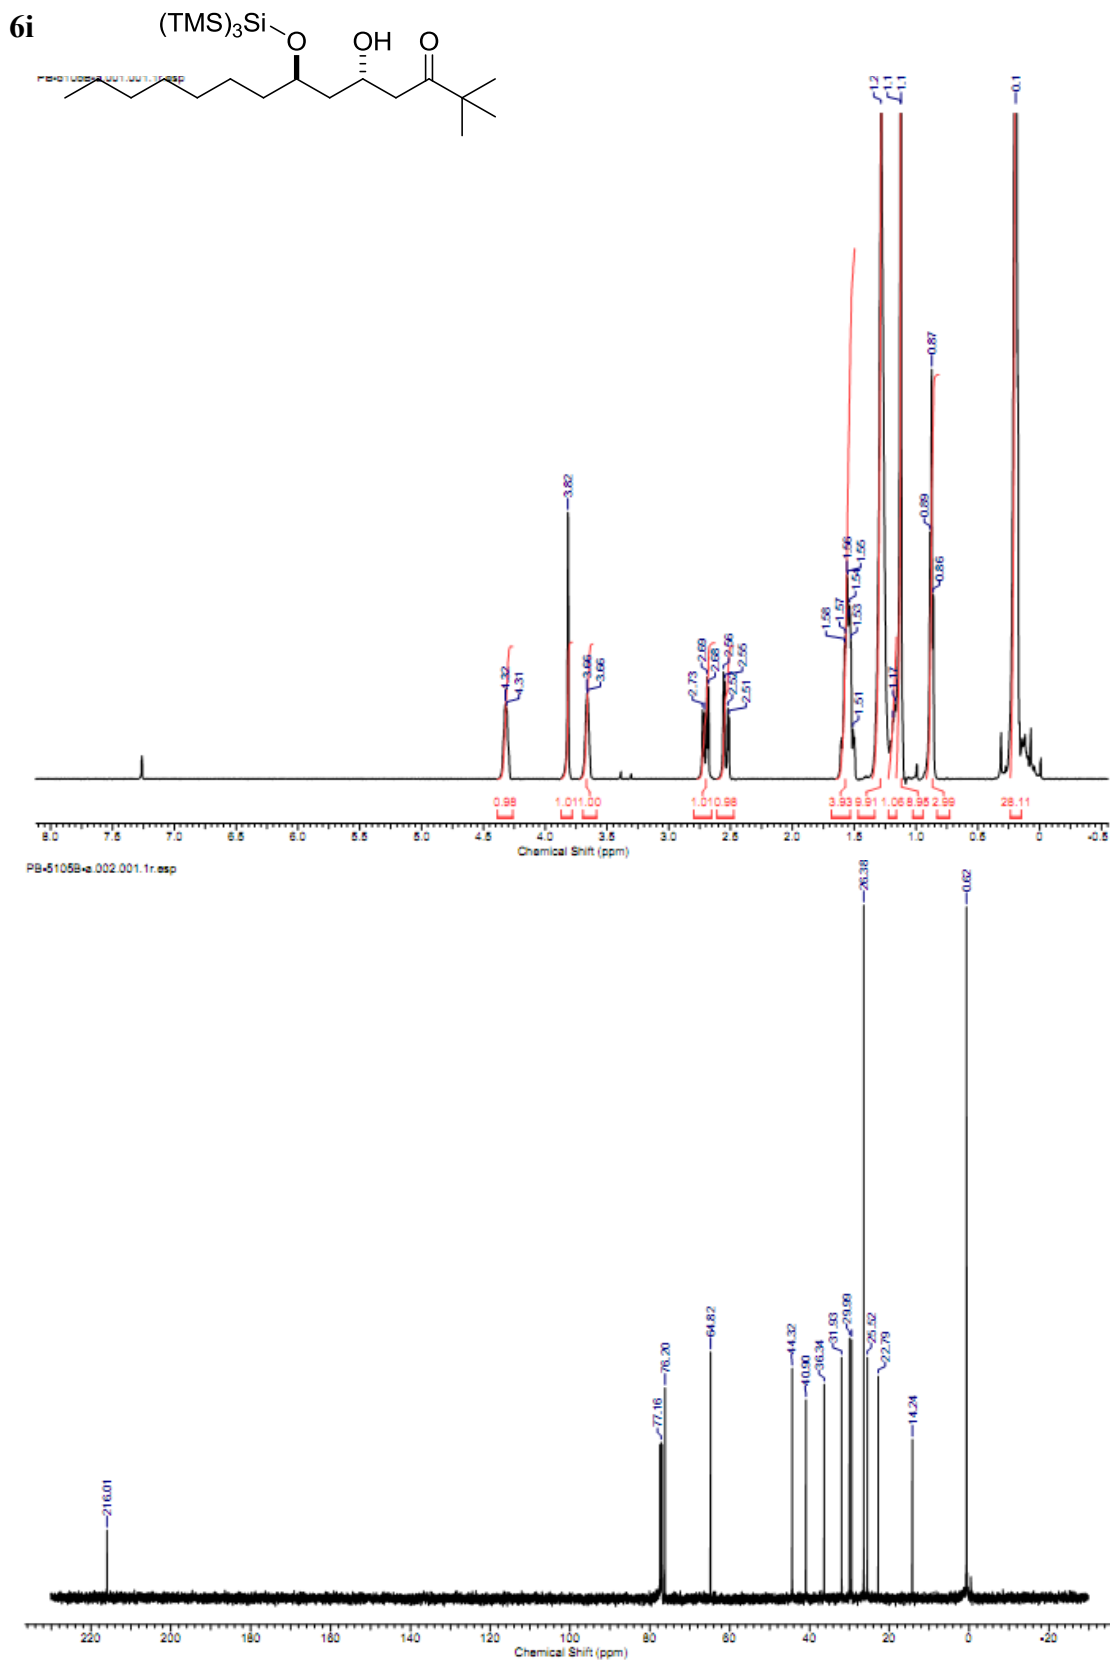

6j

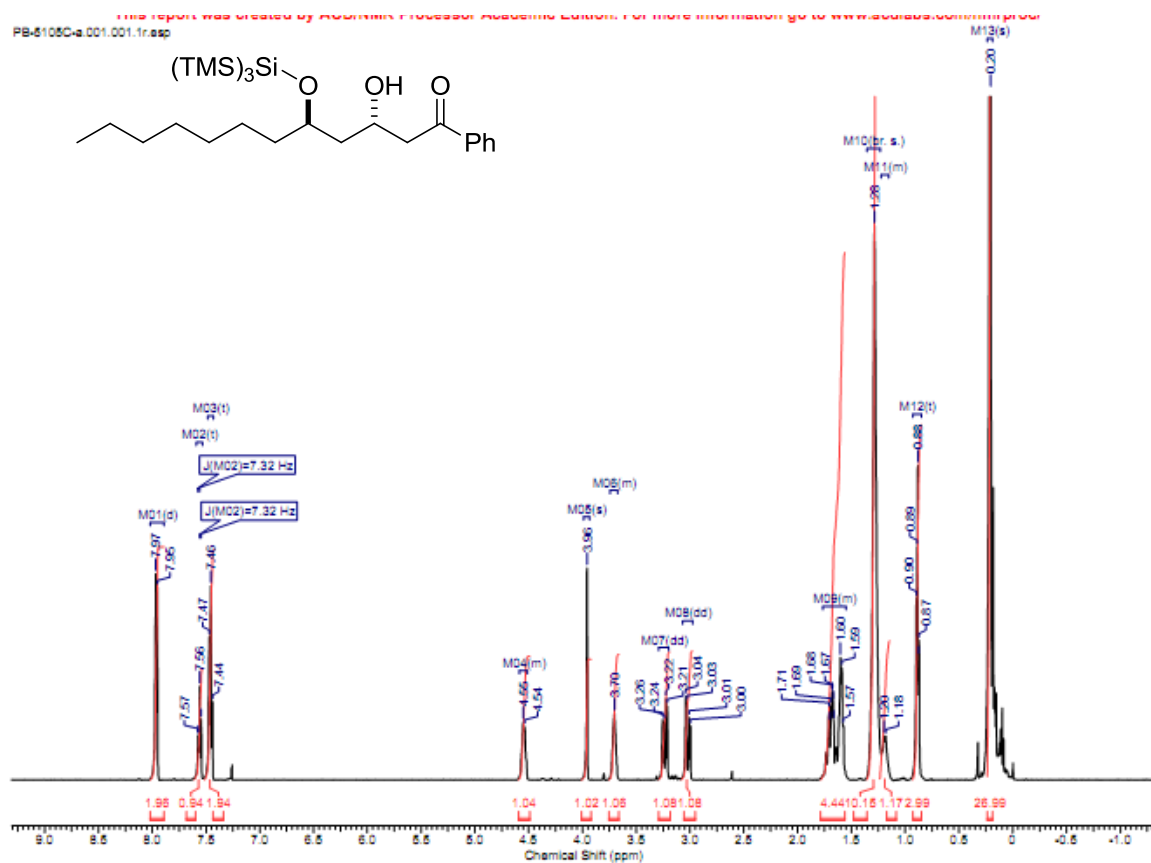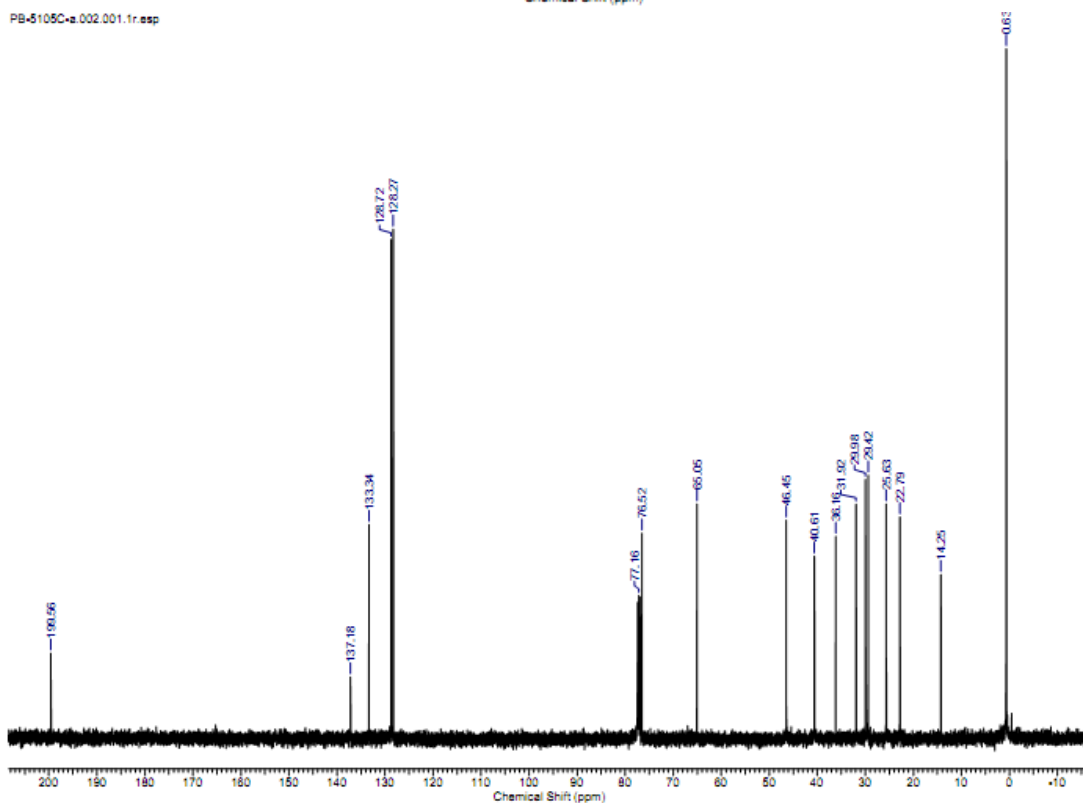

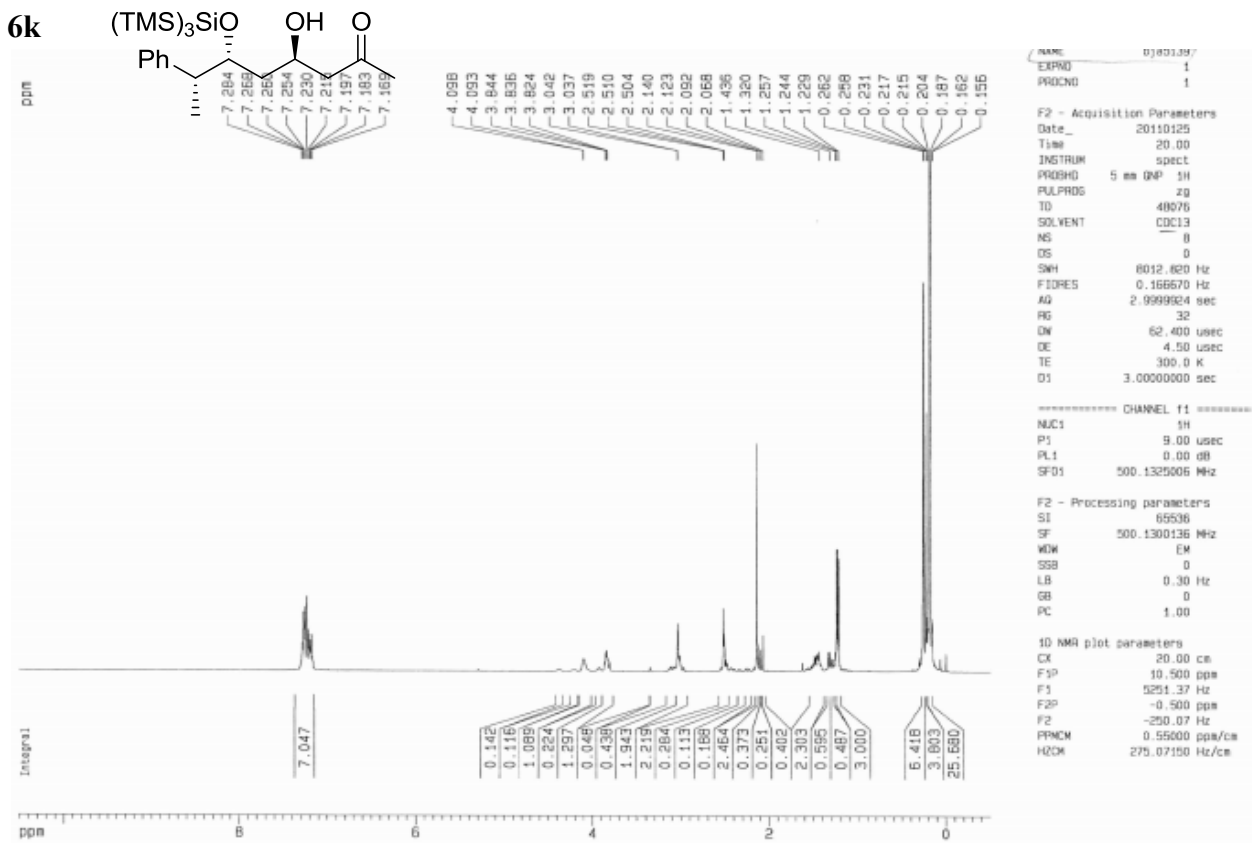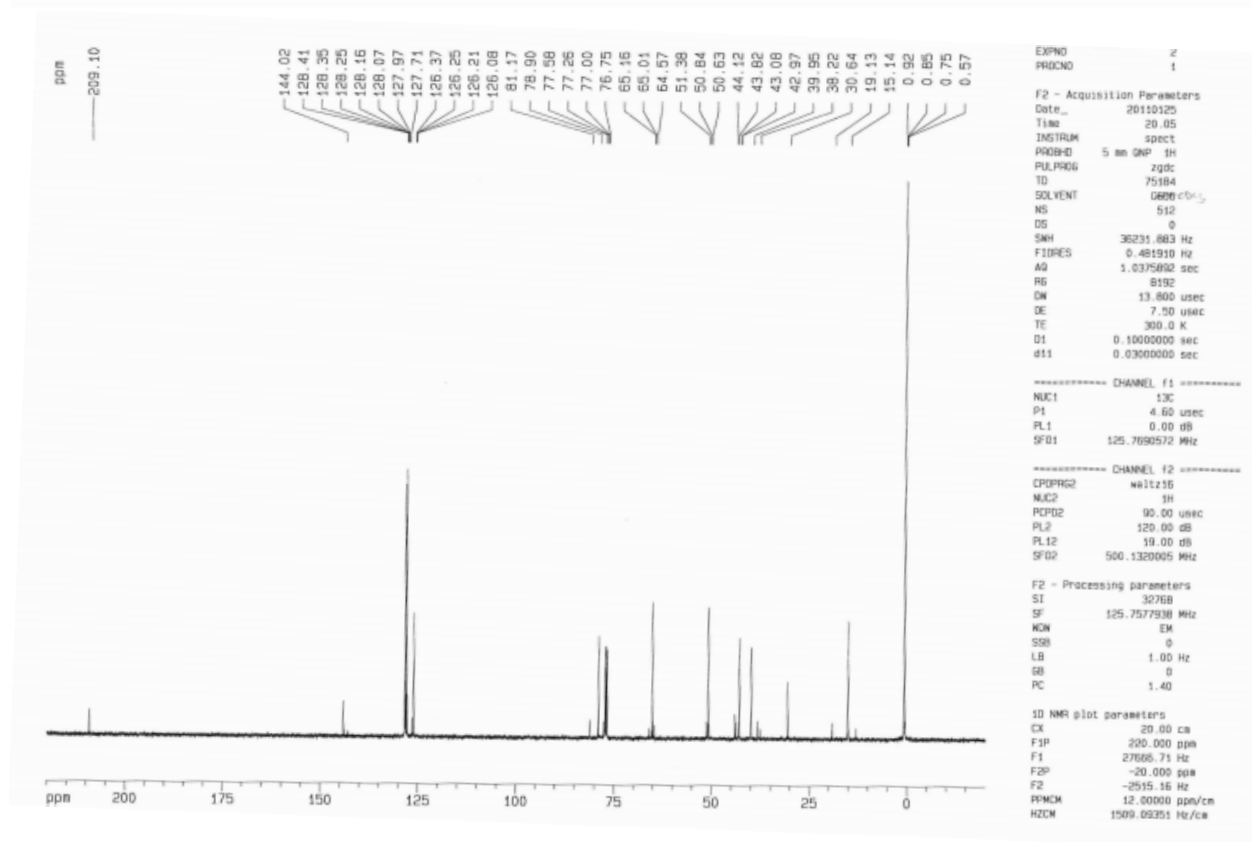

8b

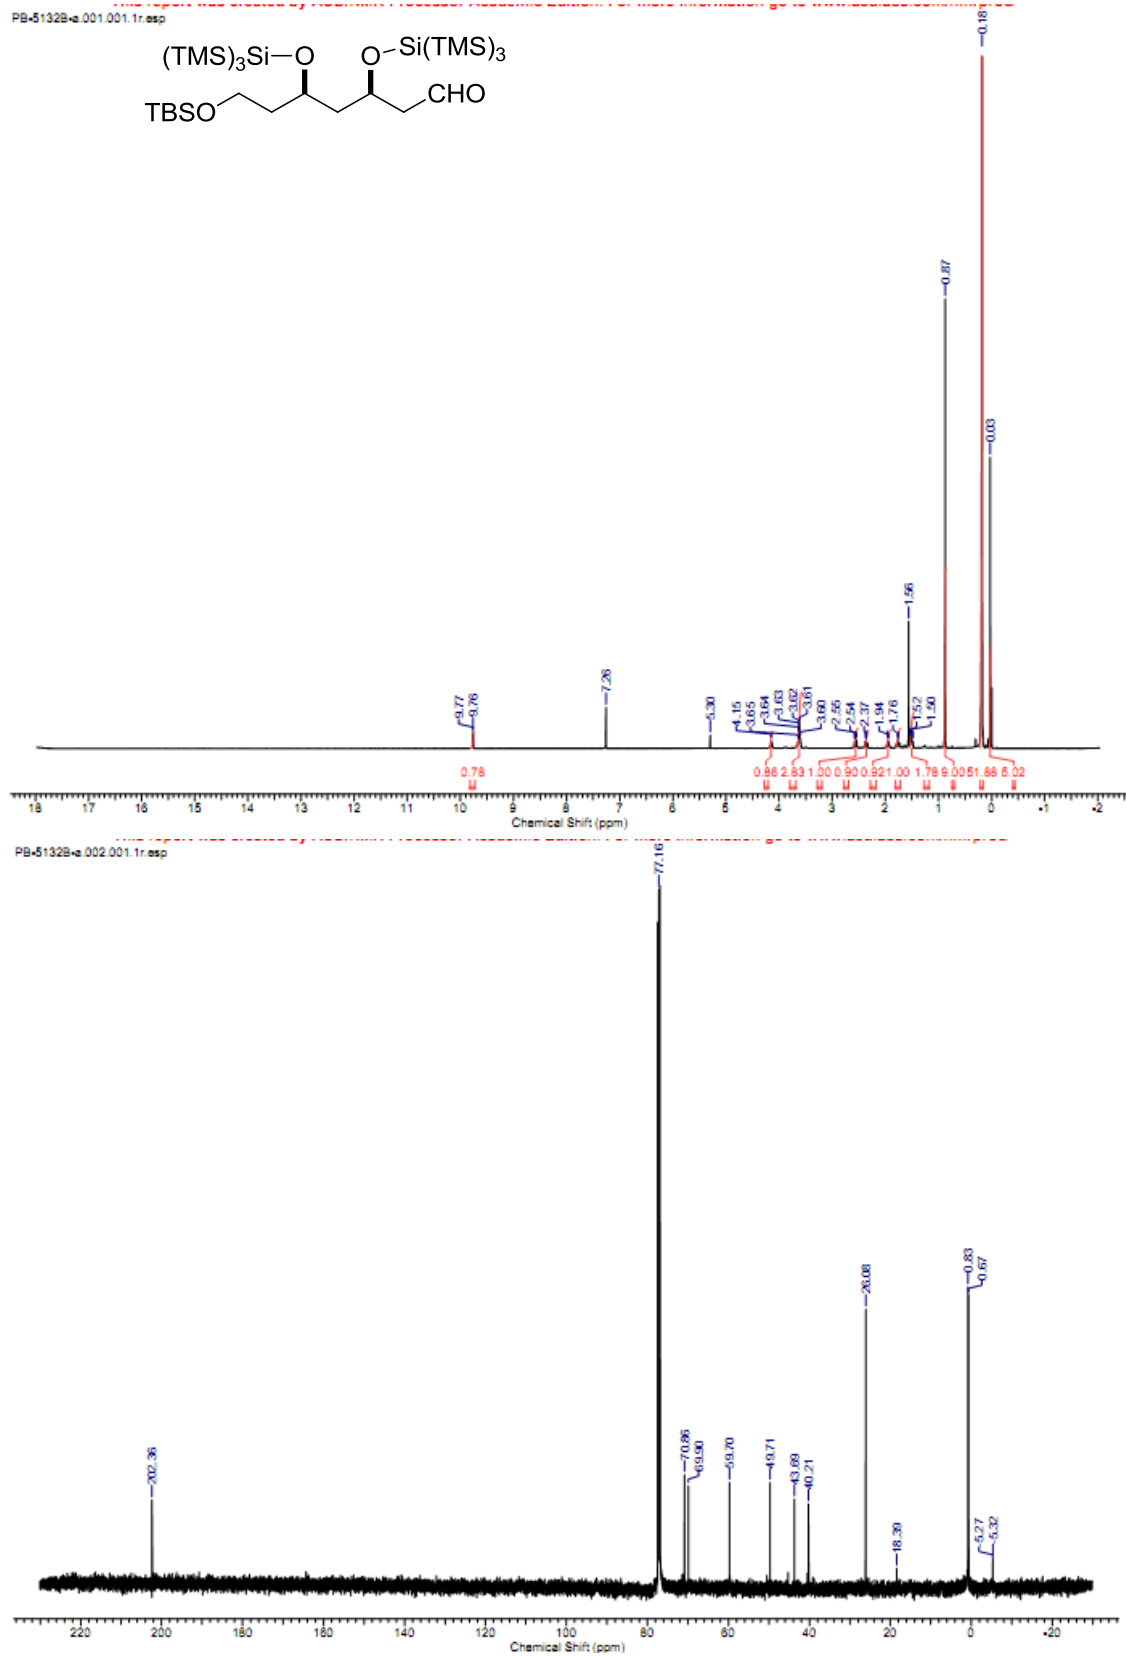

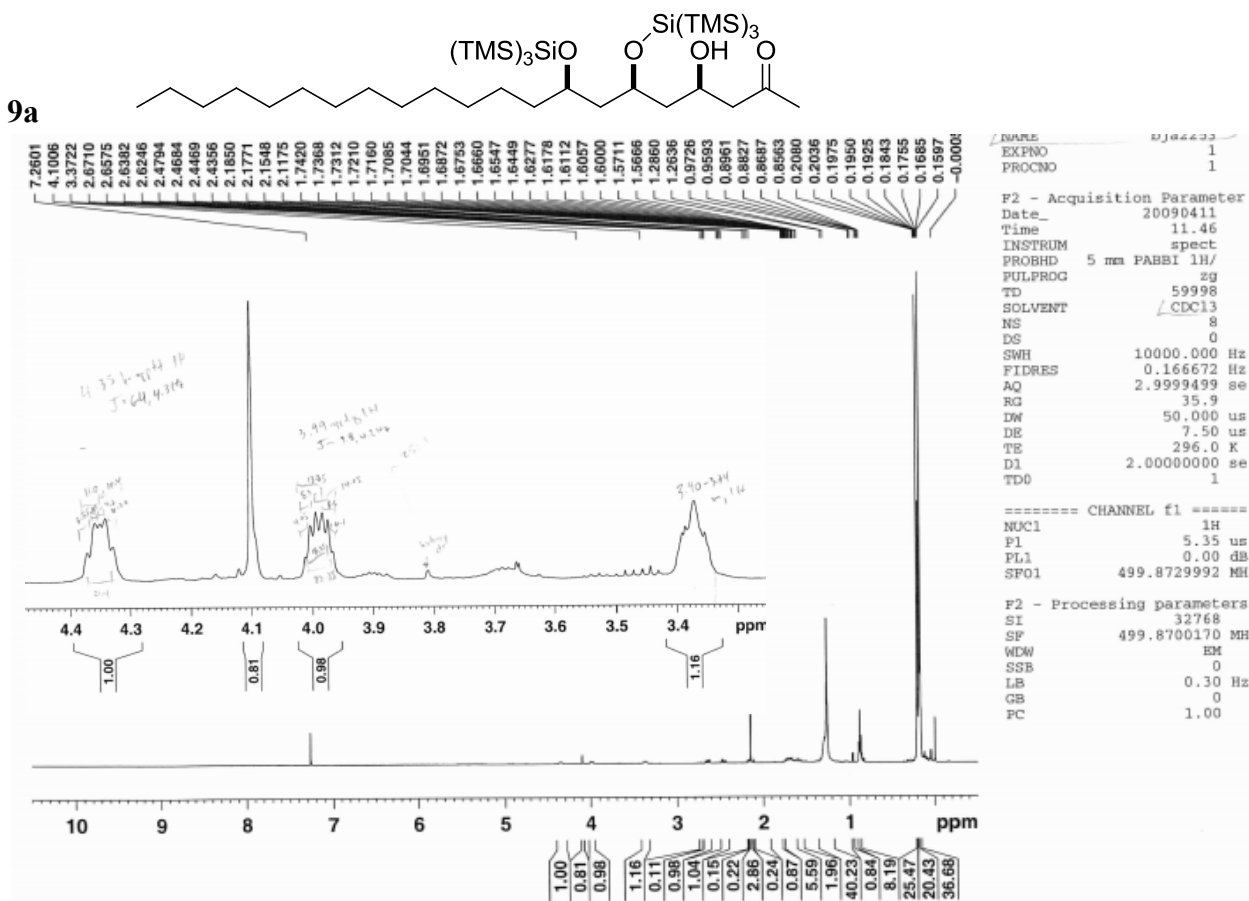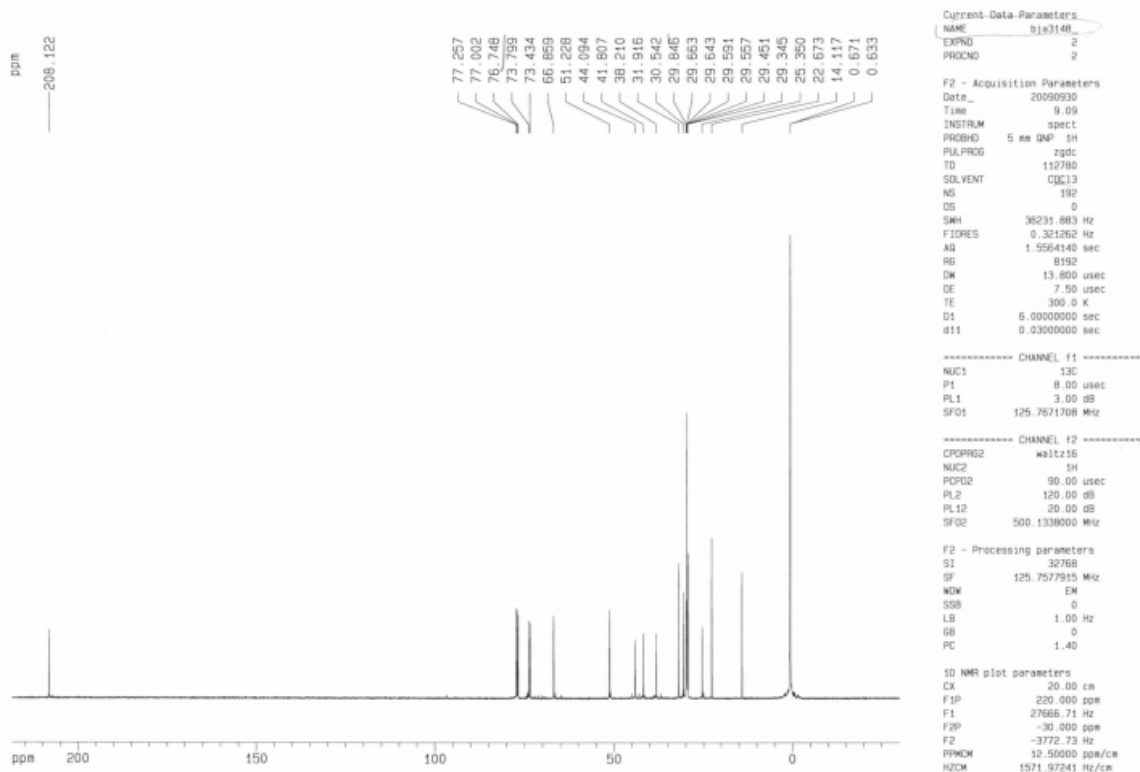

9b

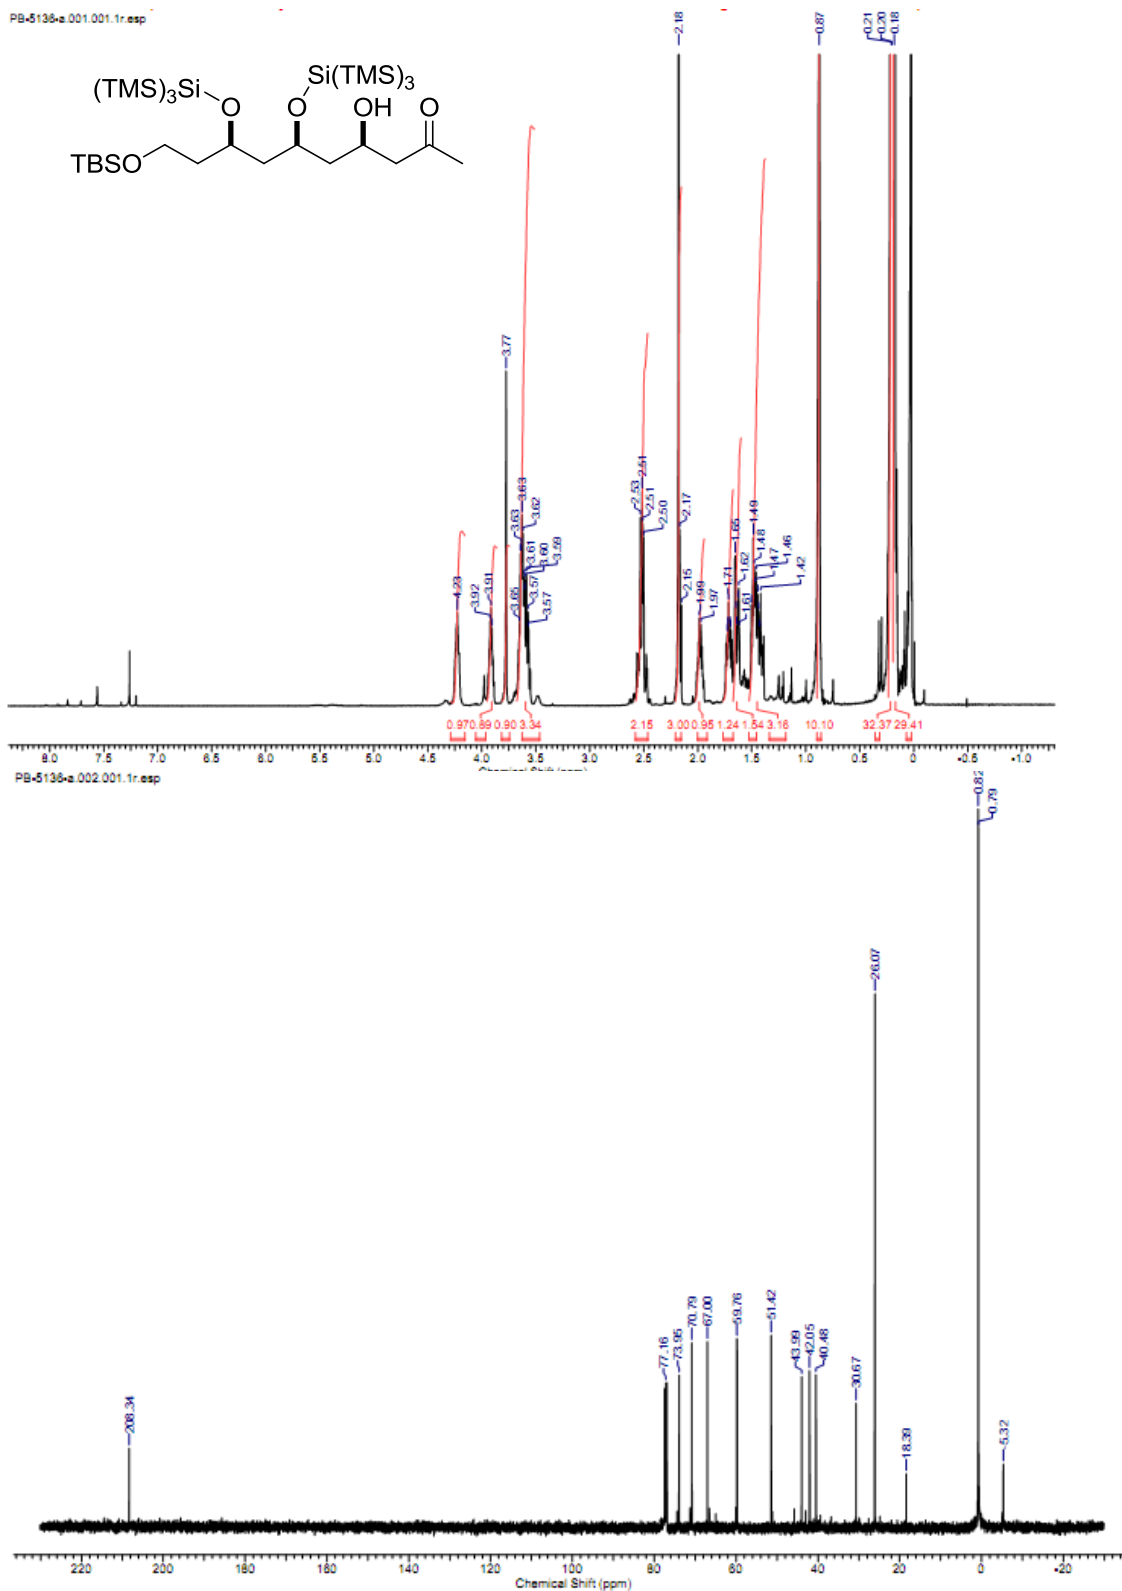

9c

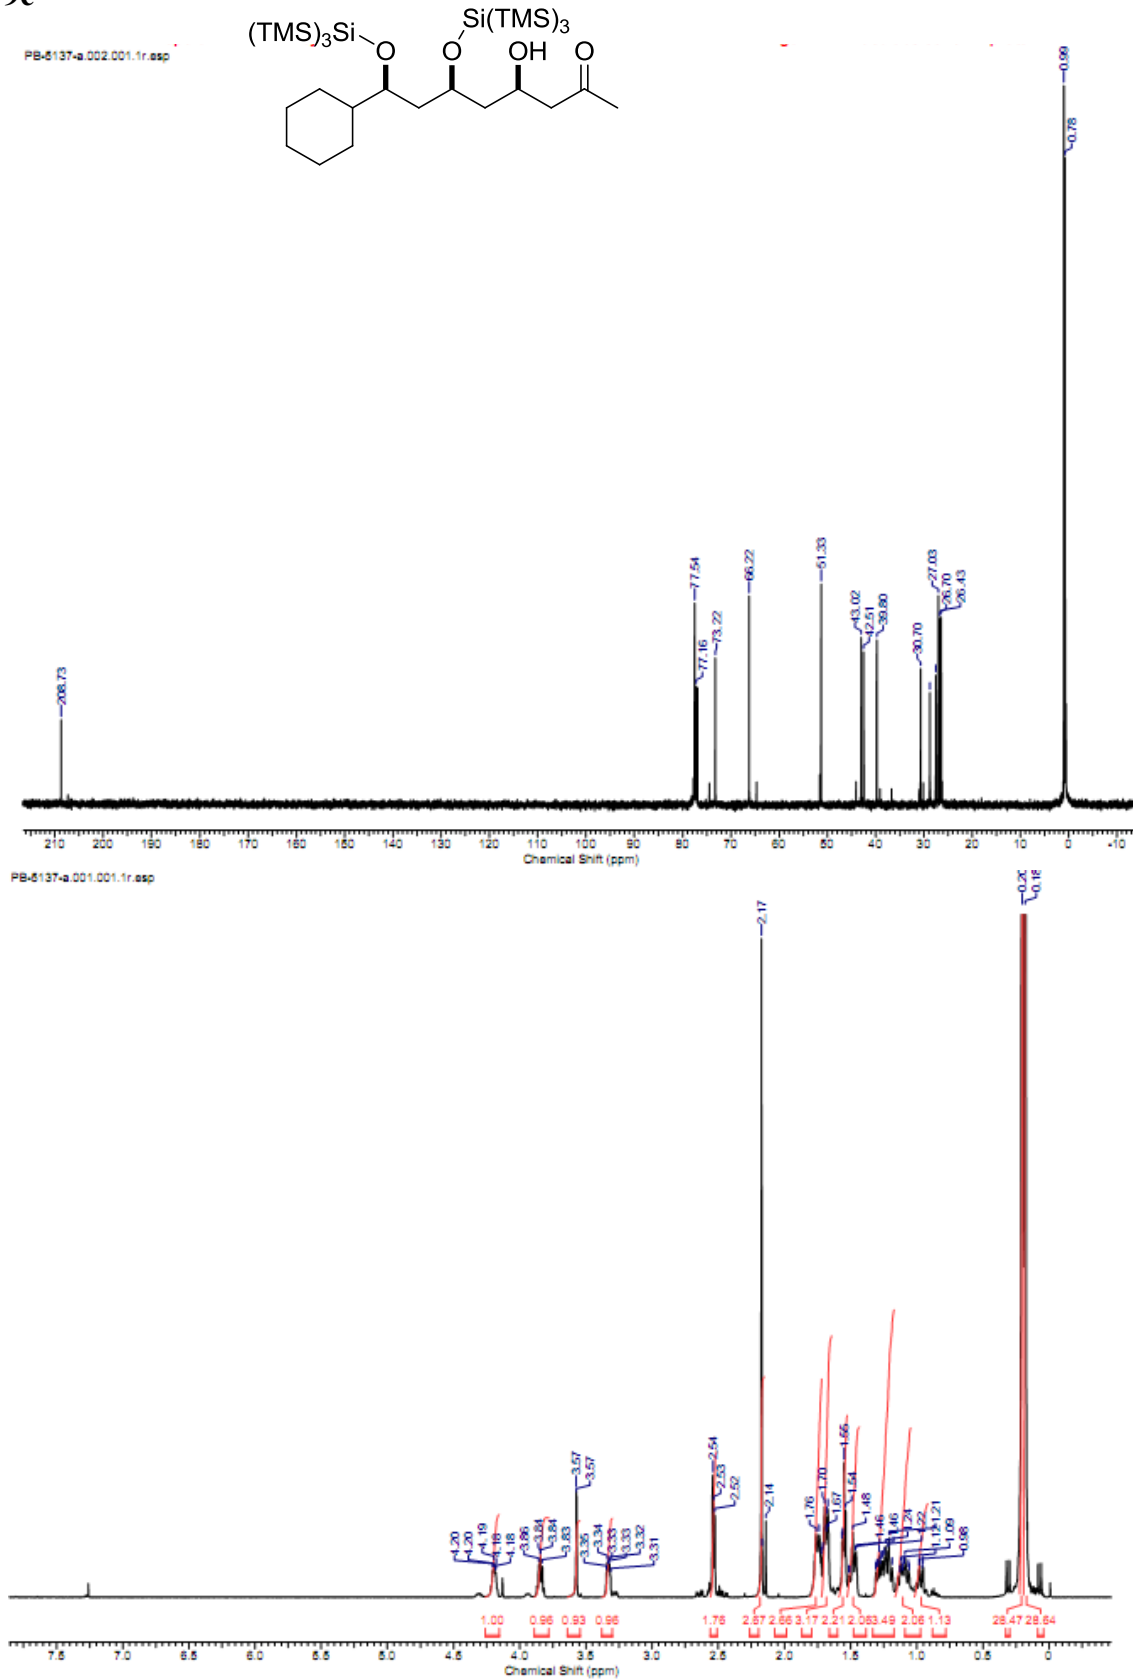



9d

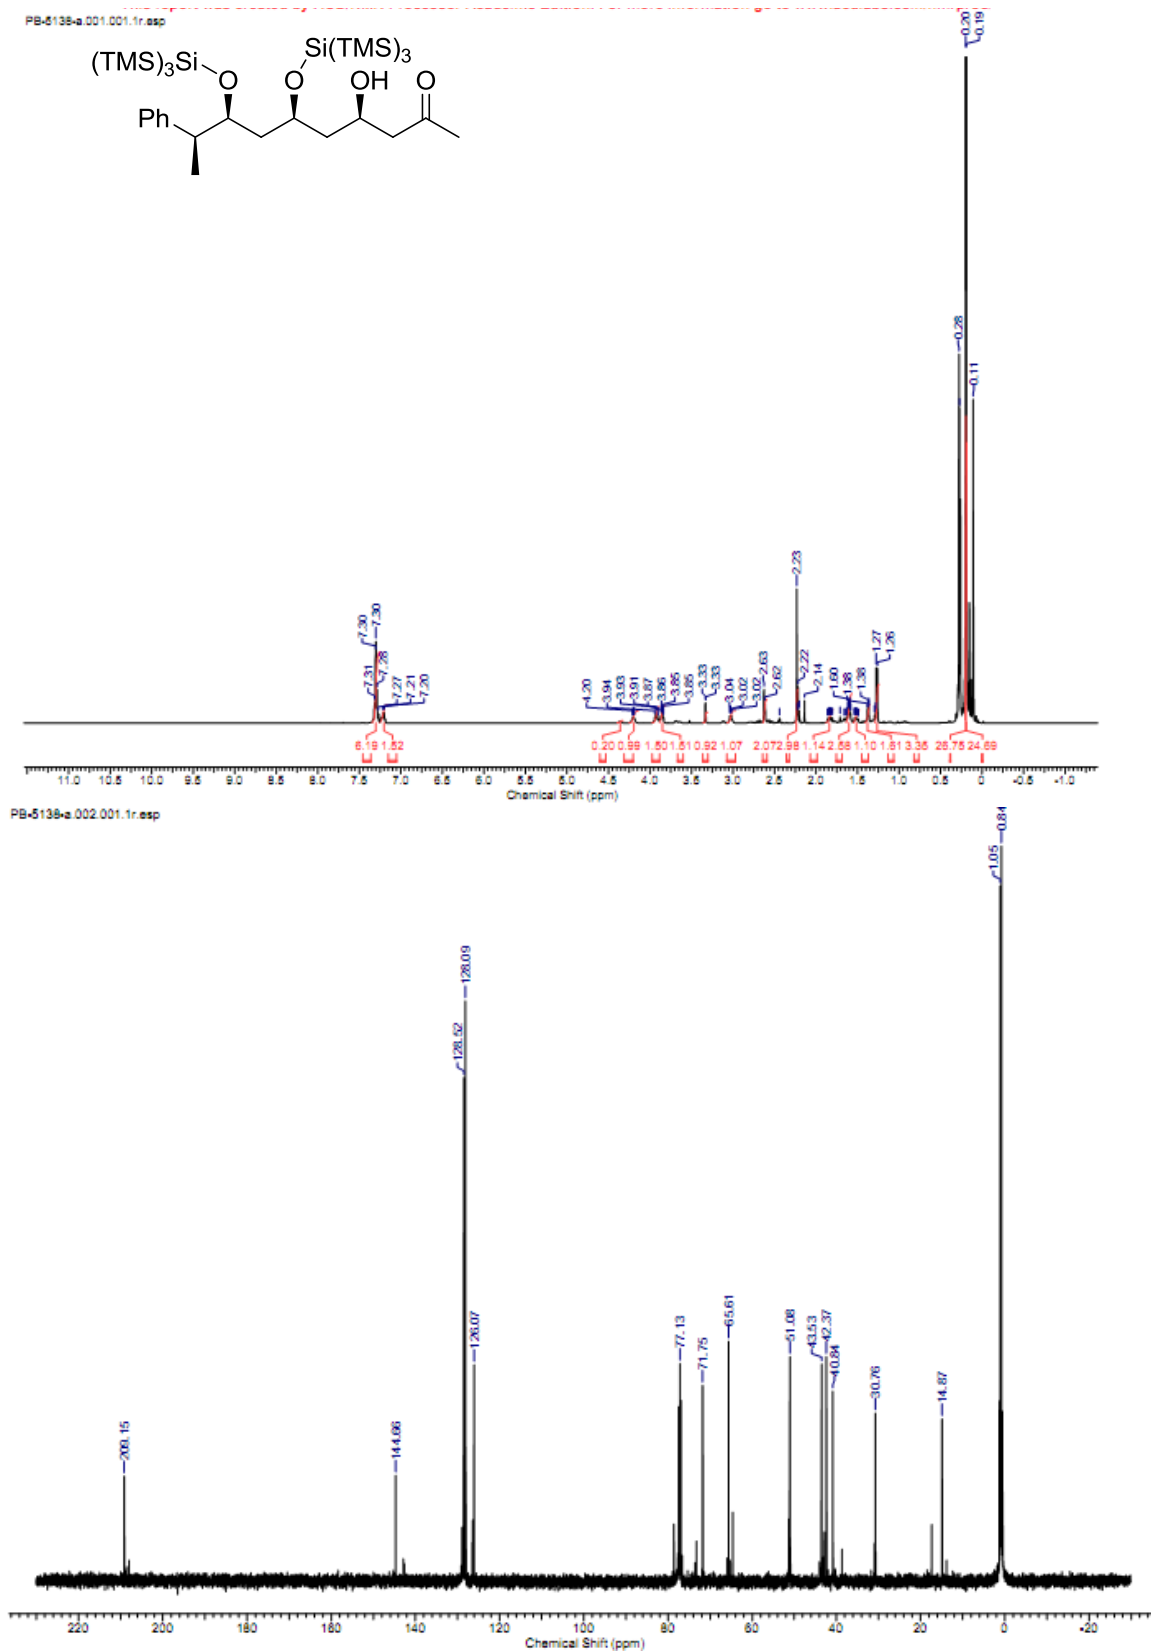

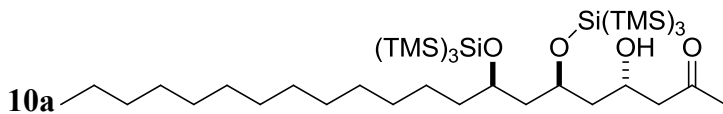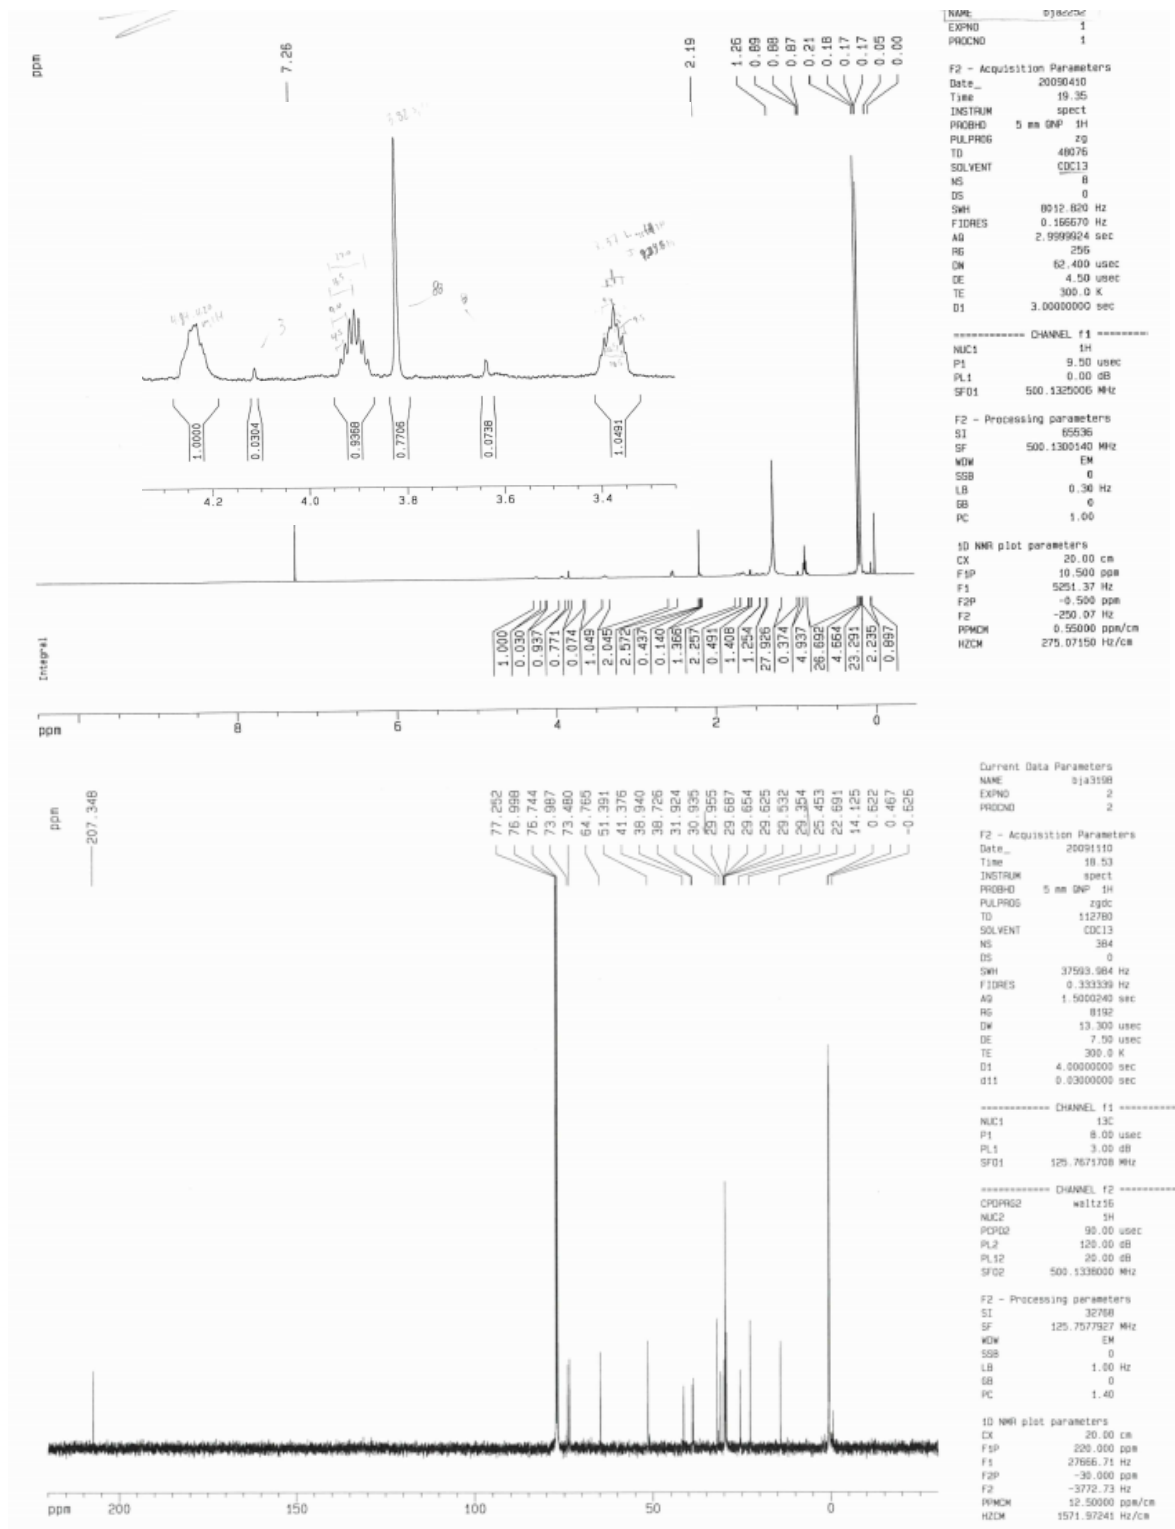



10d

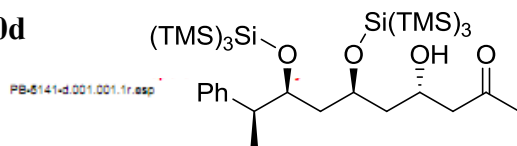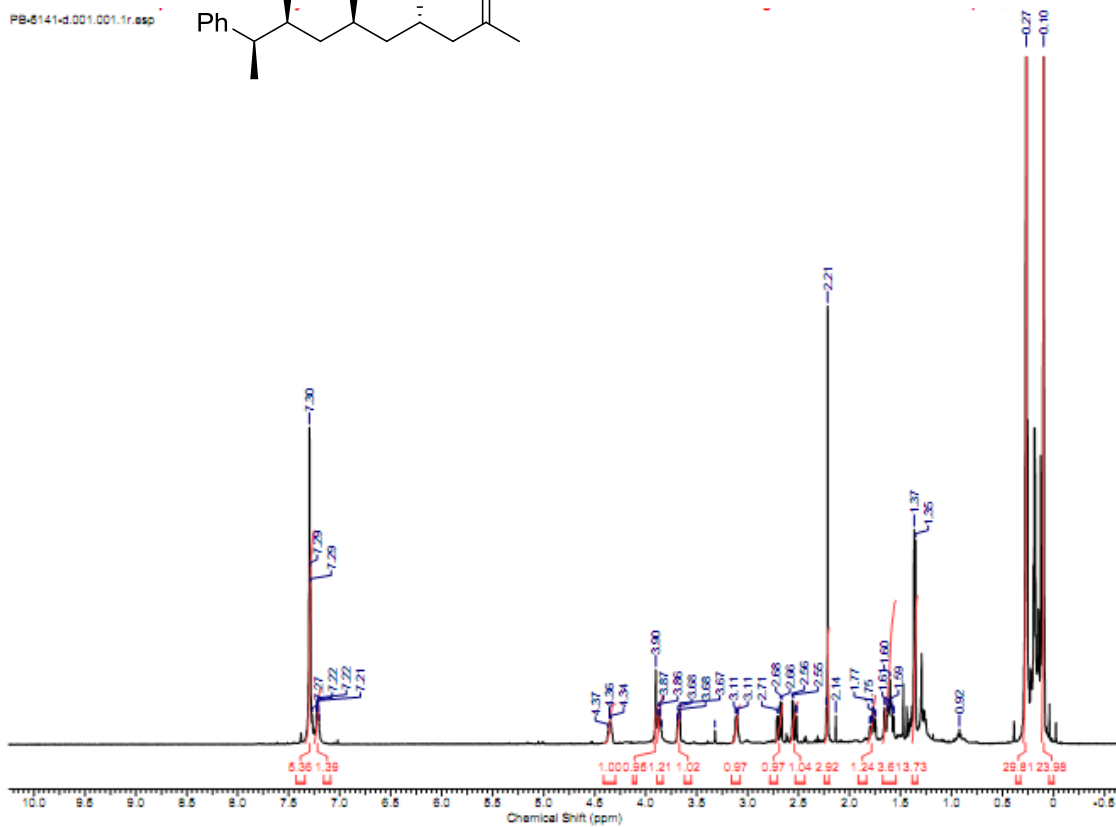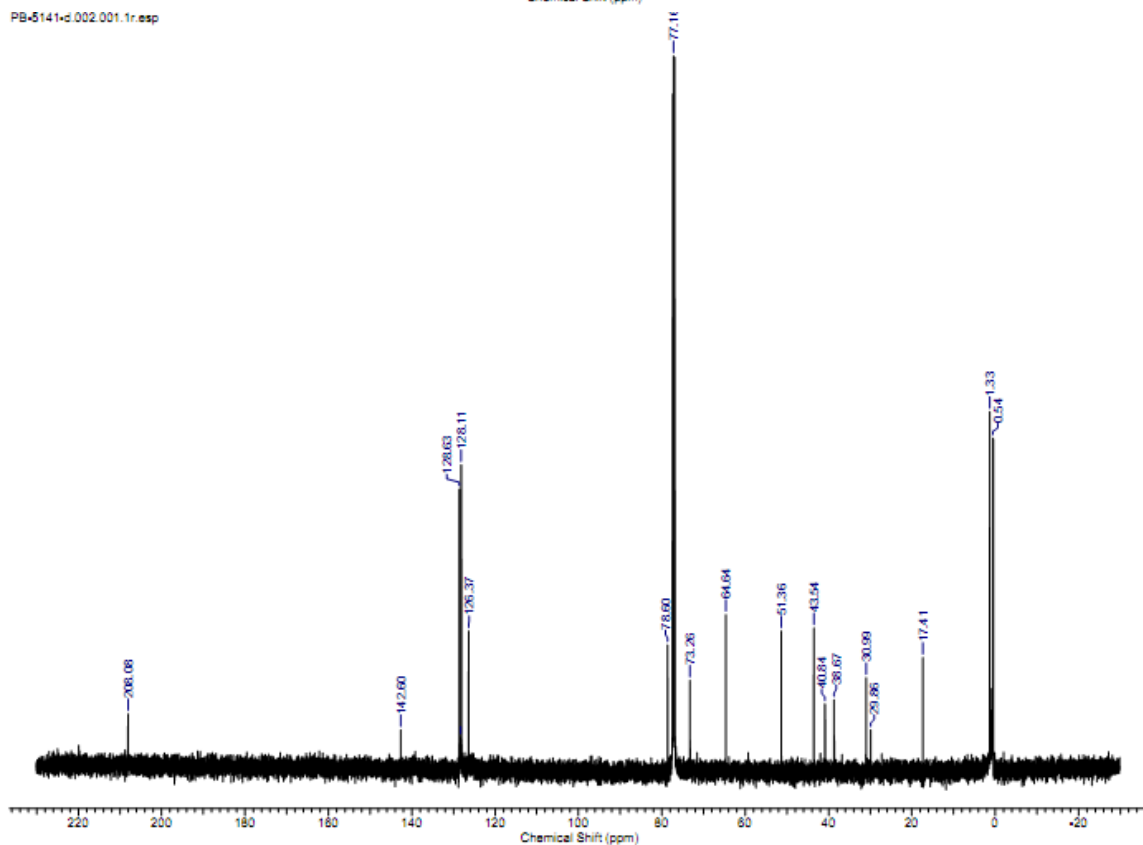

10e

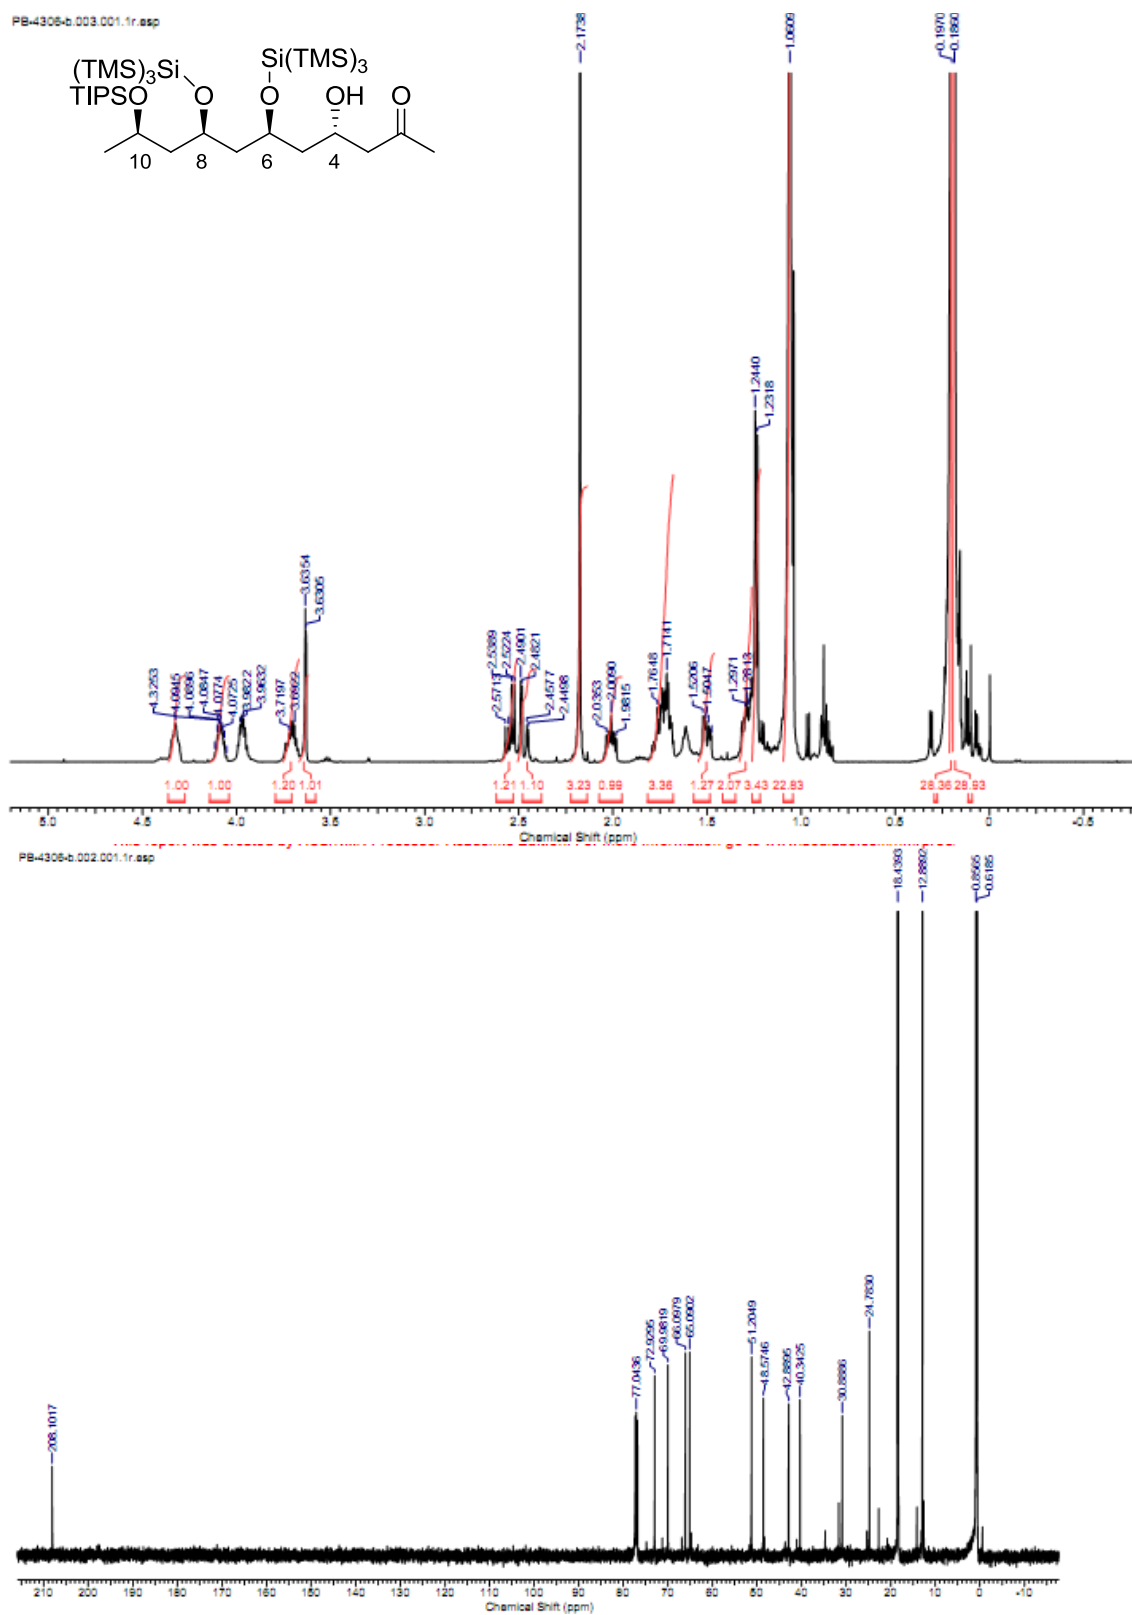

12

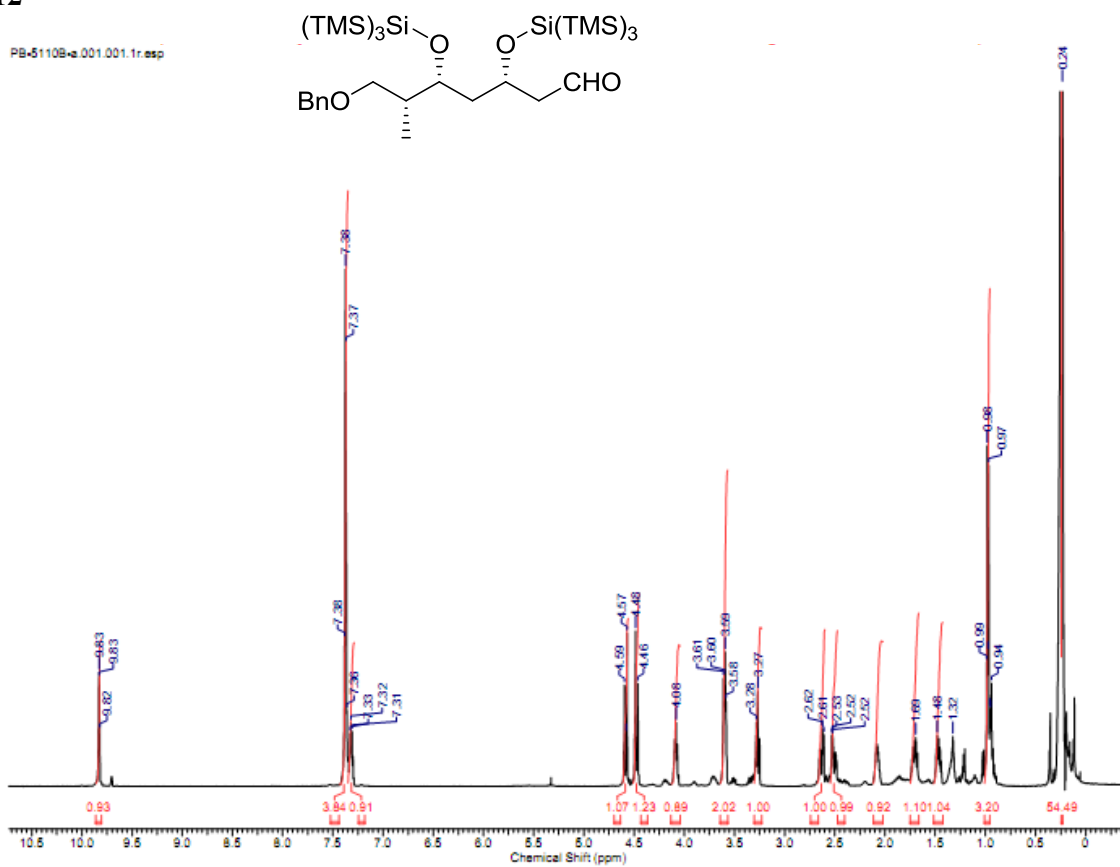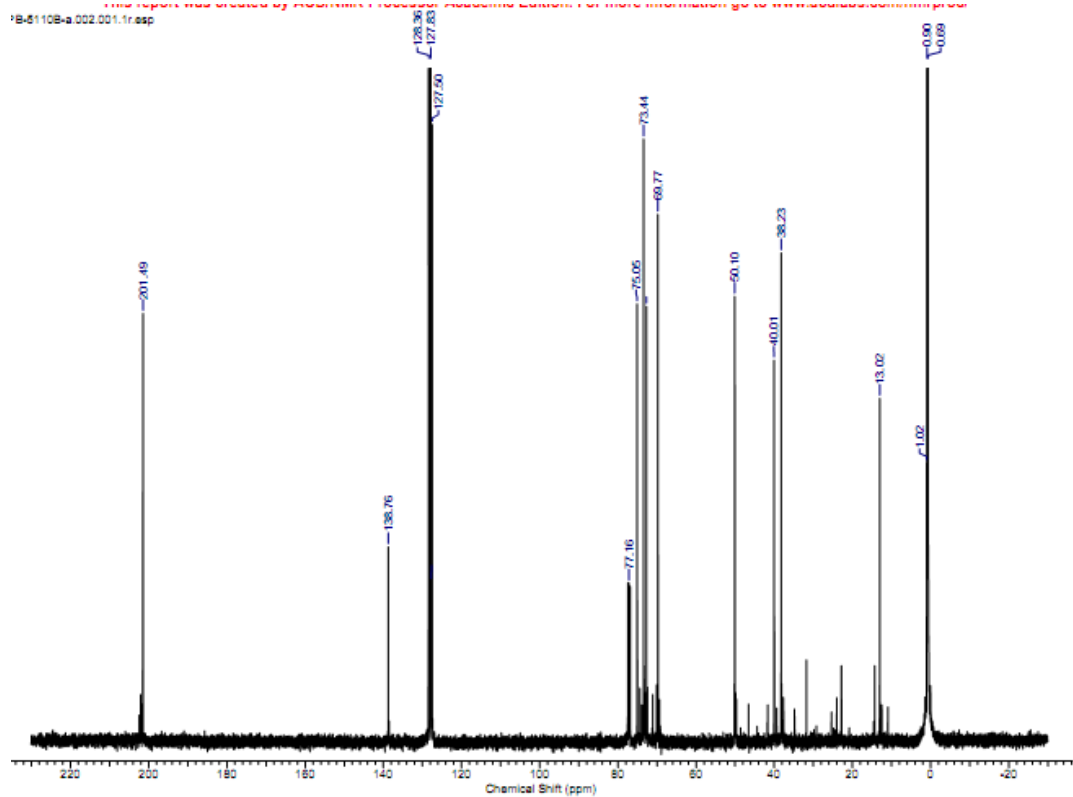

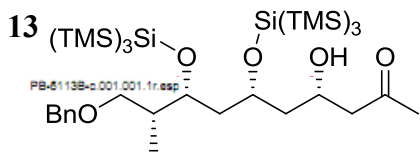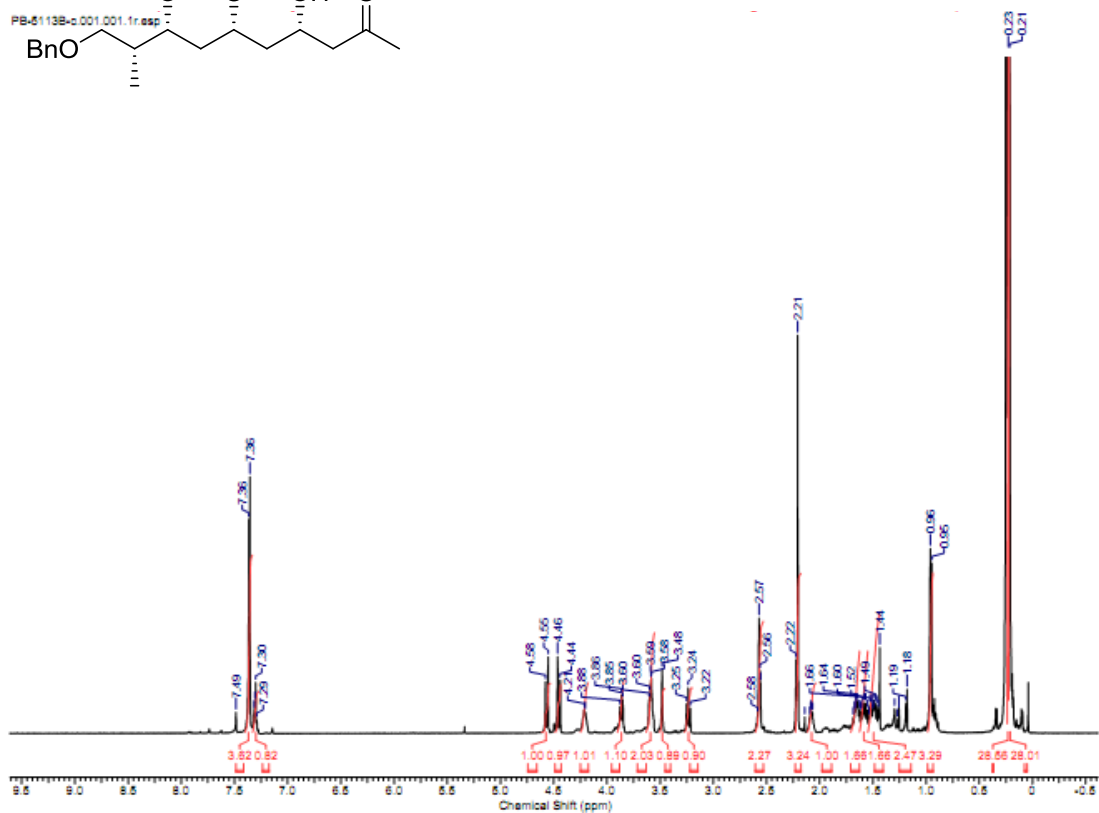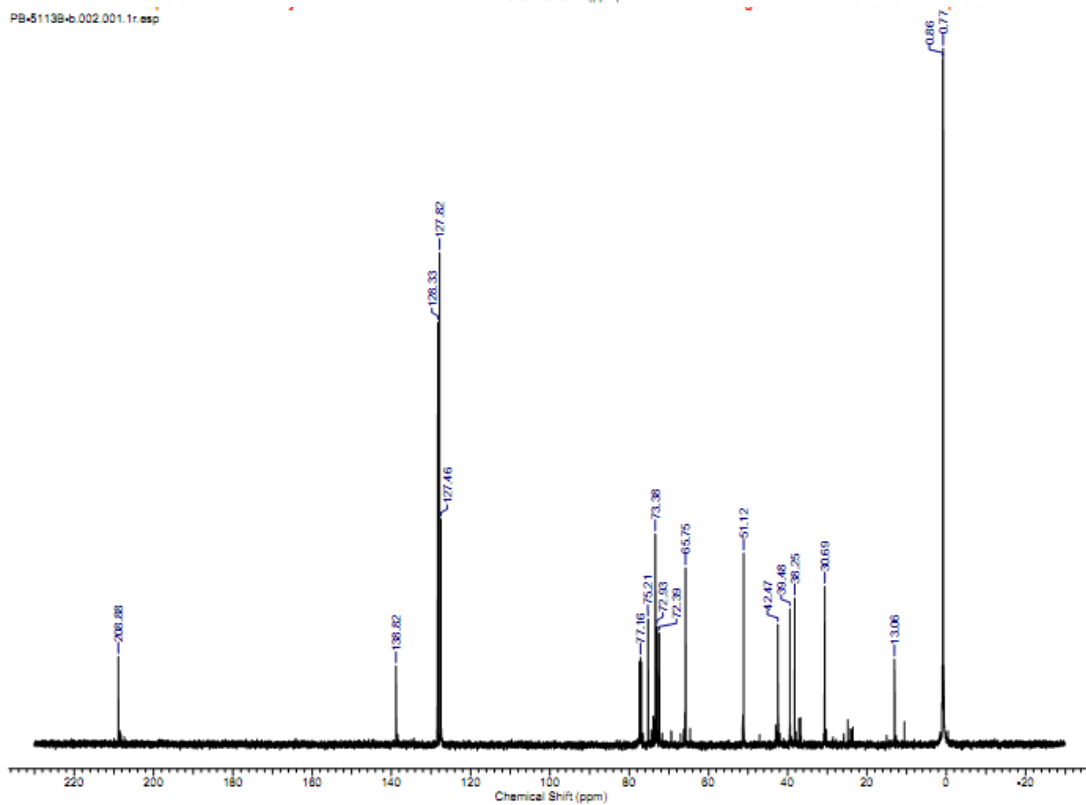

14

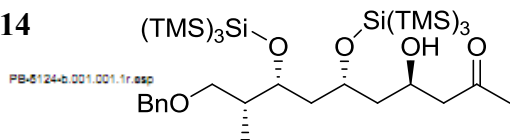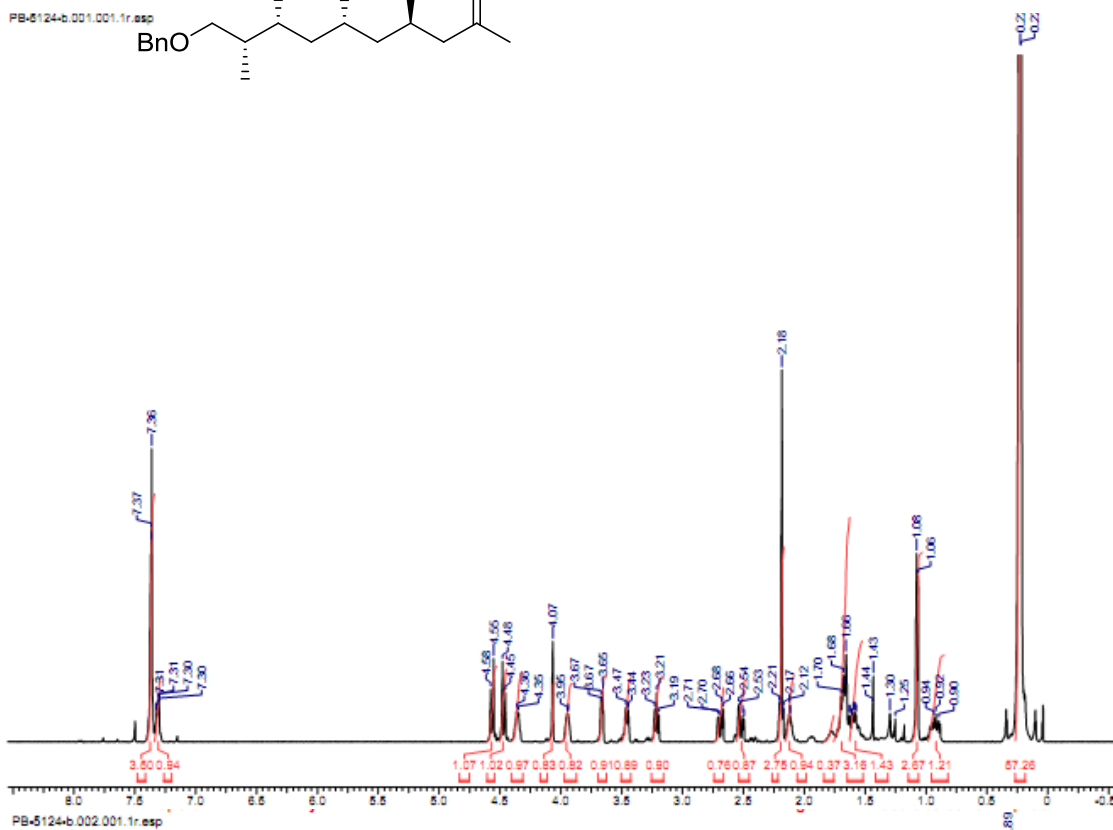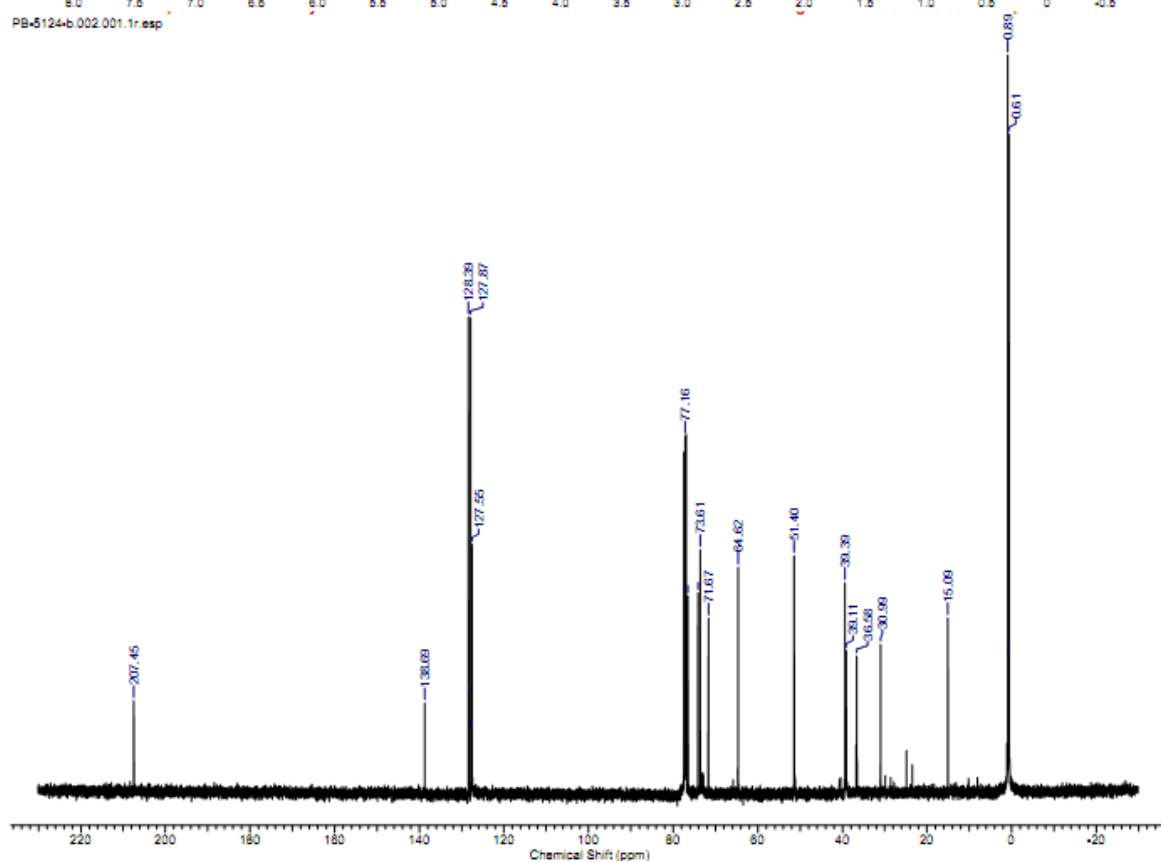



15a

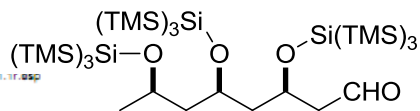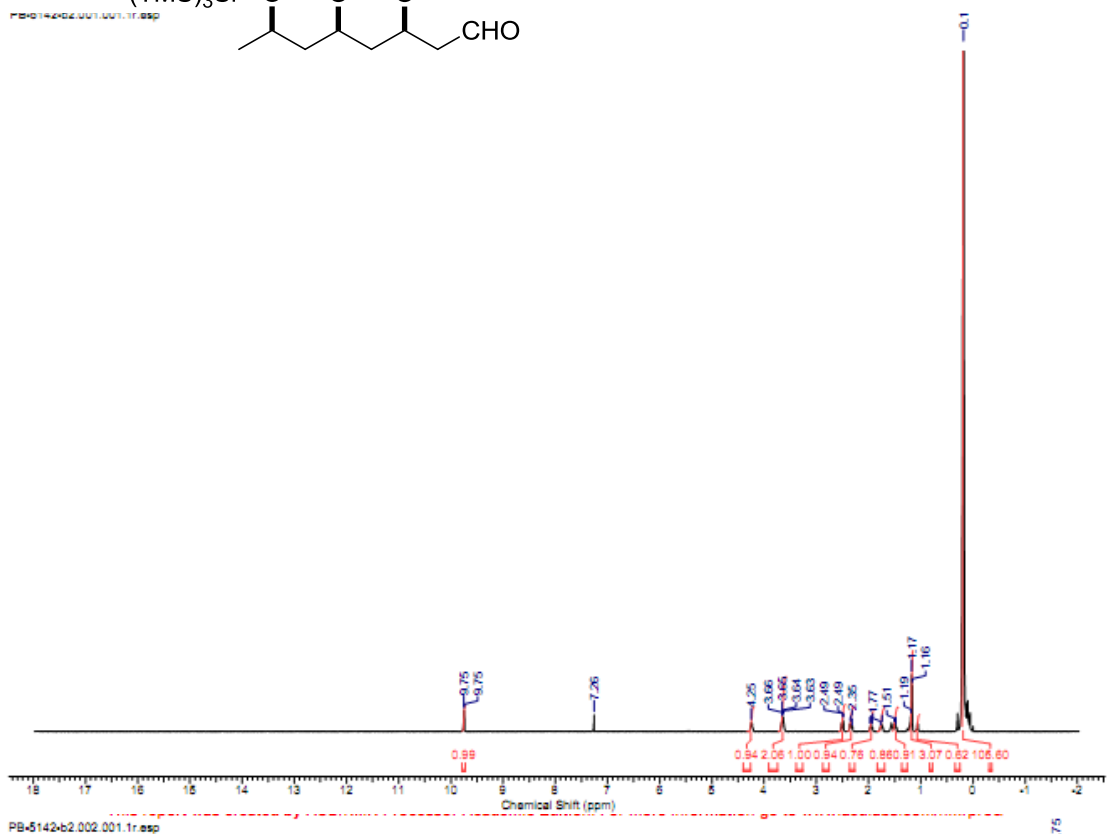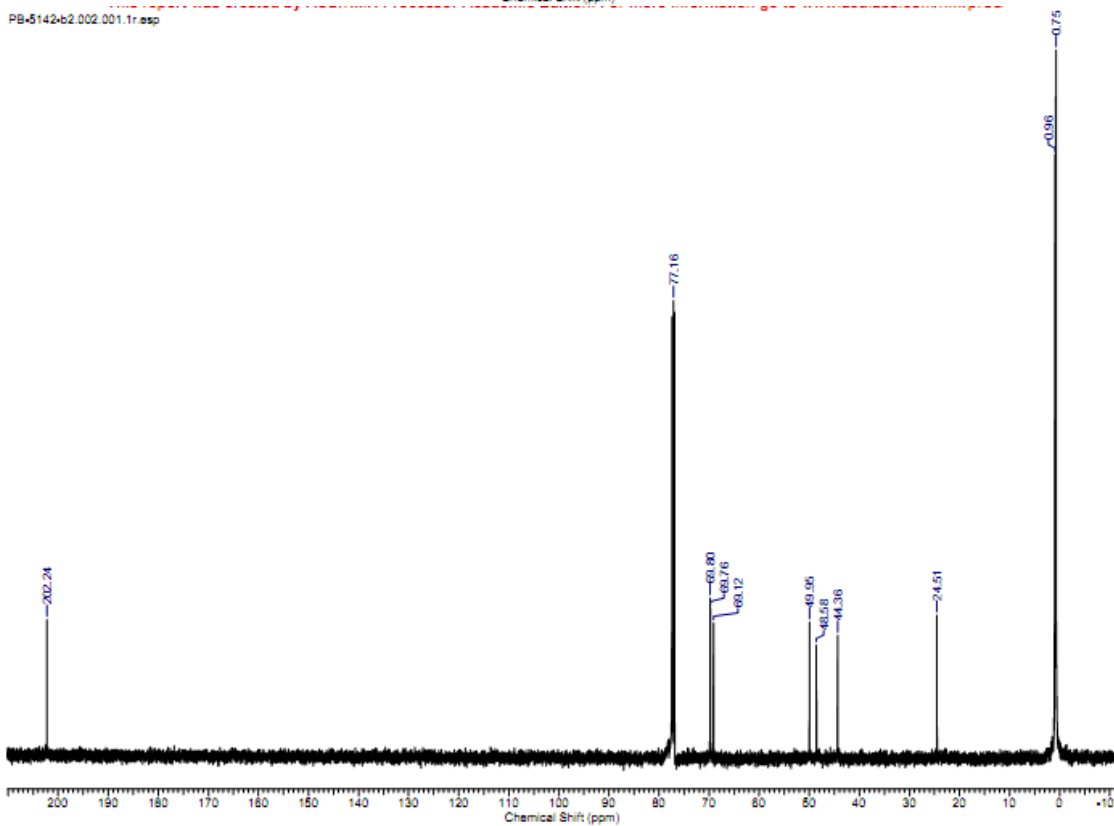



16b

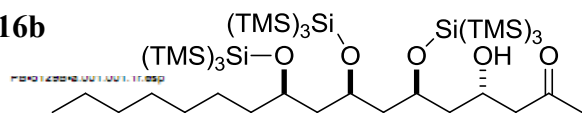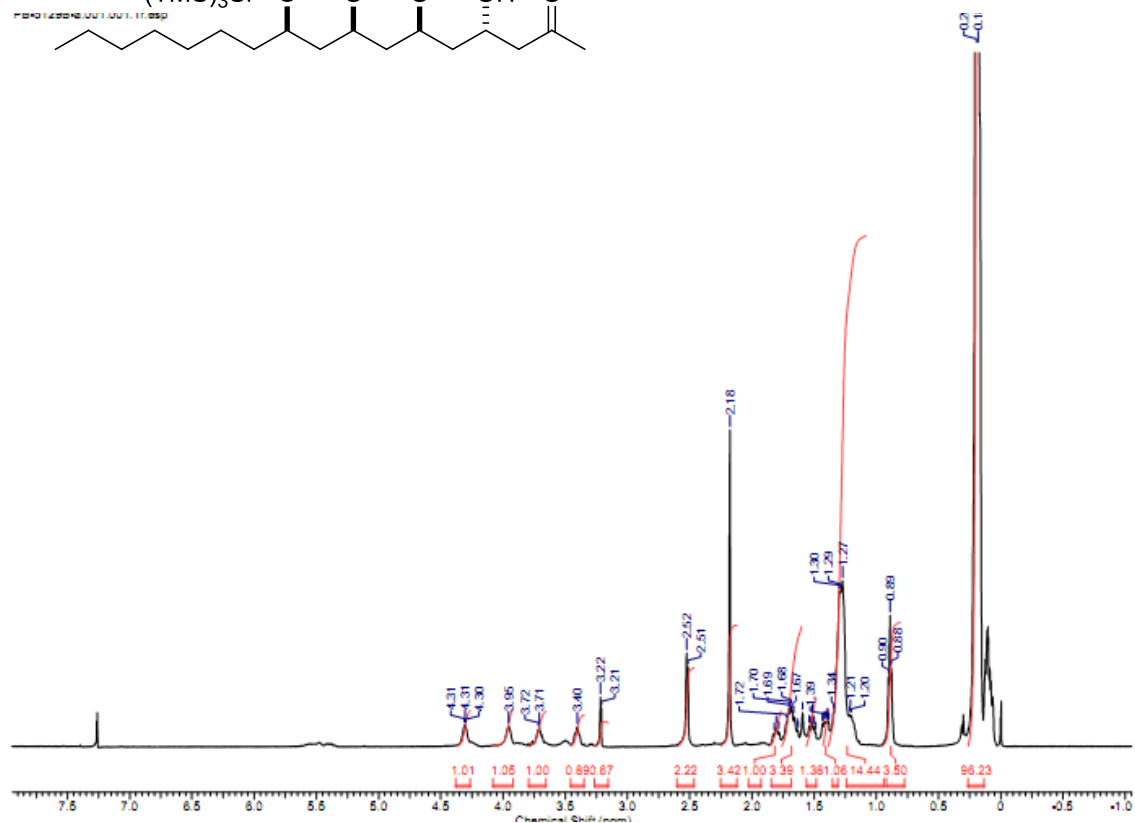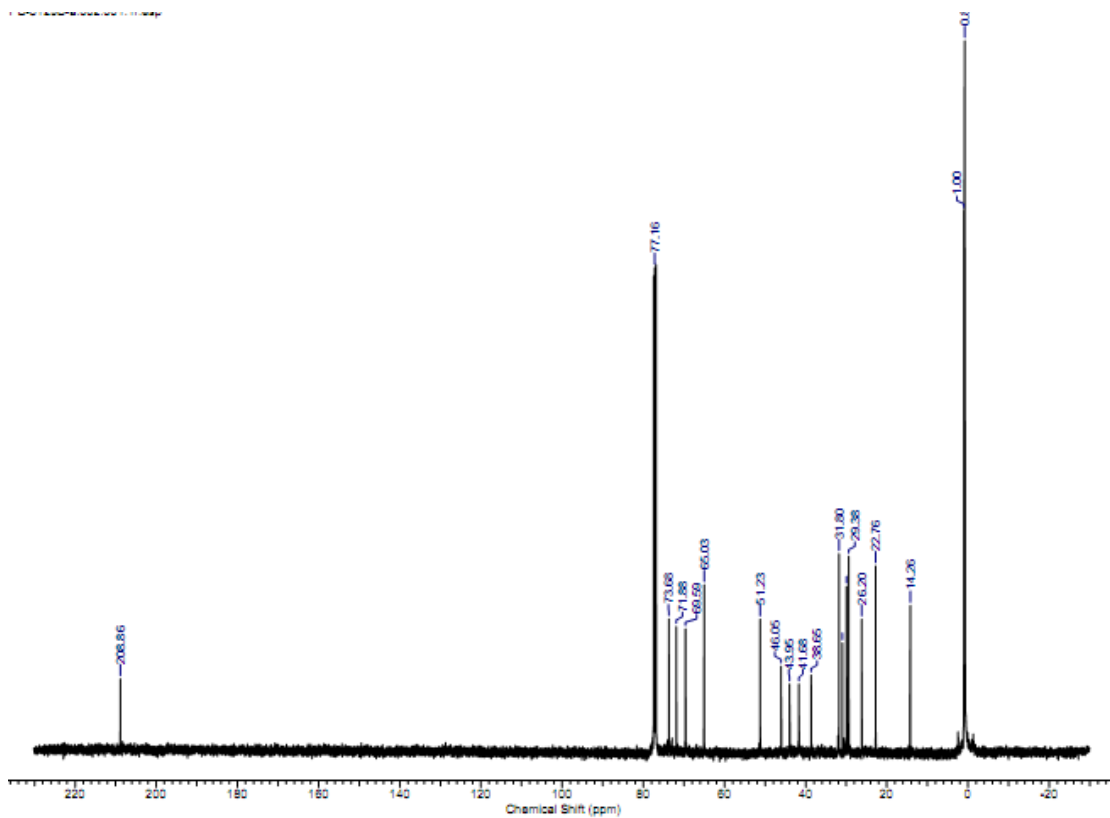

16c

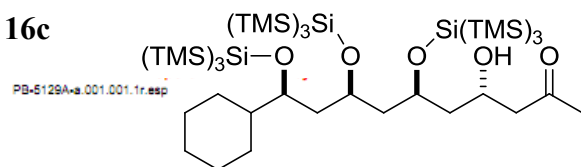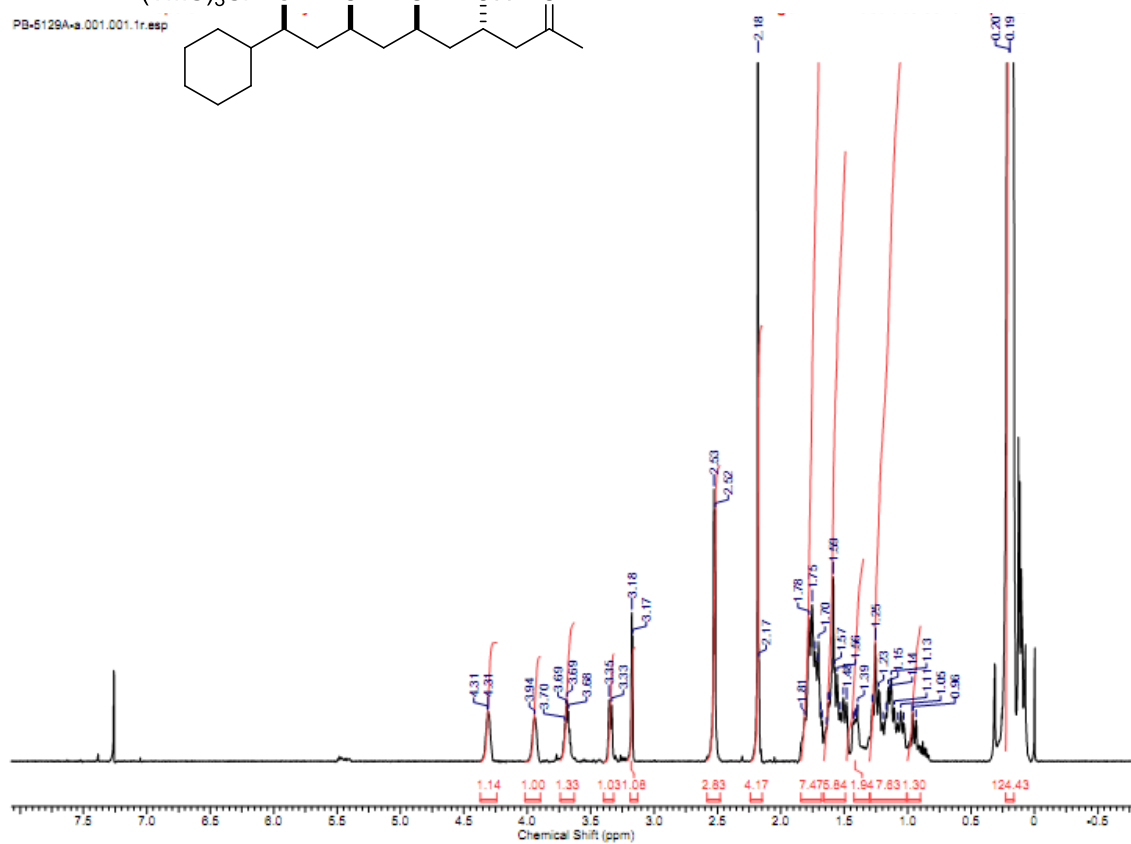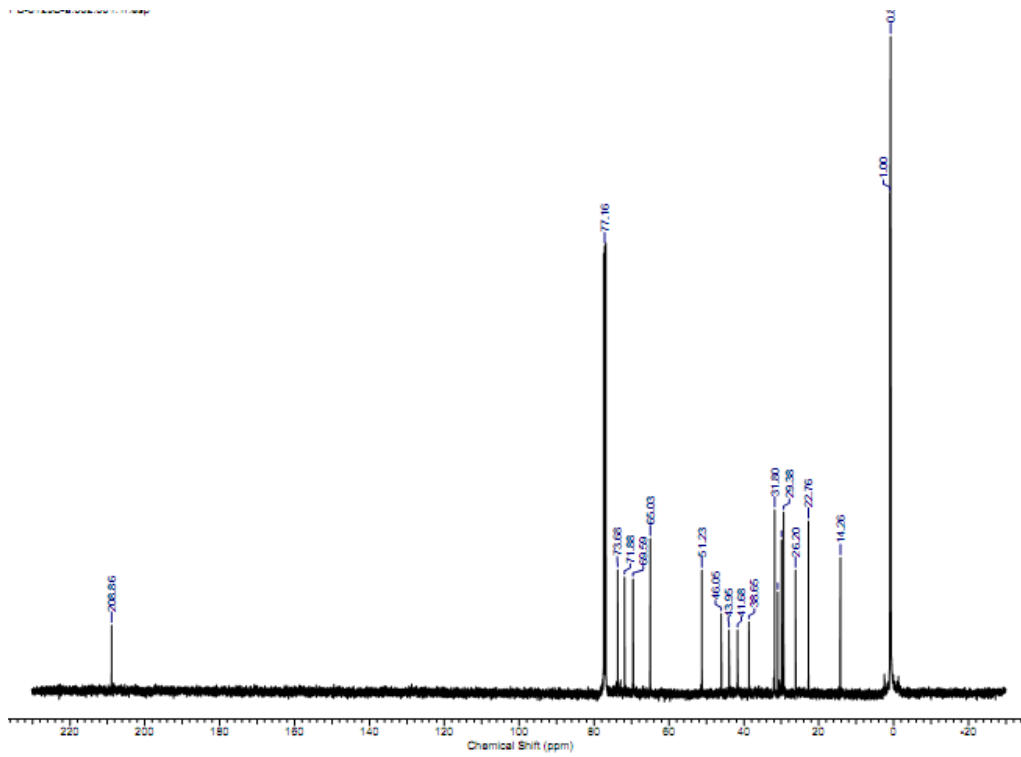



20a

HNMR400MHz (CDCl3) 1H NMR

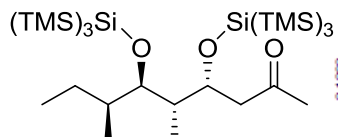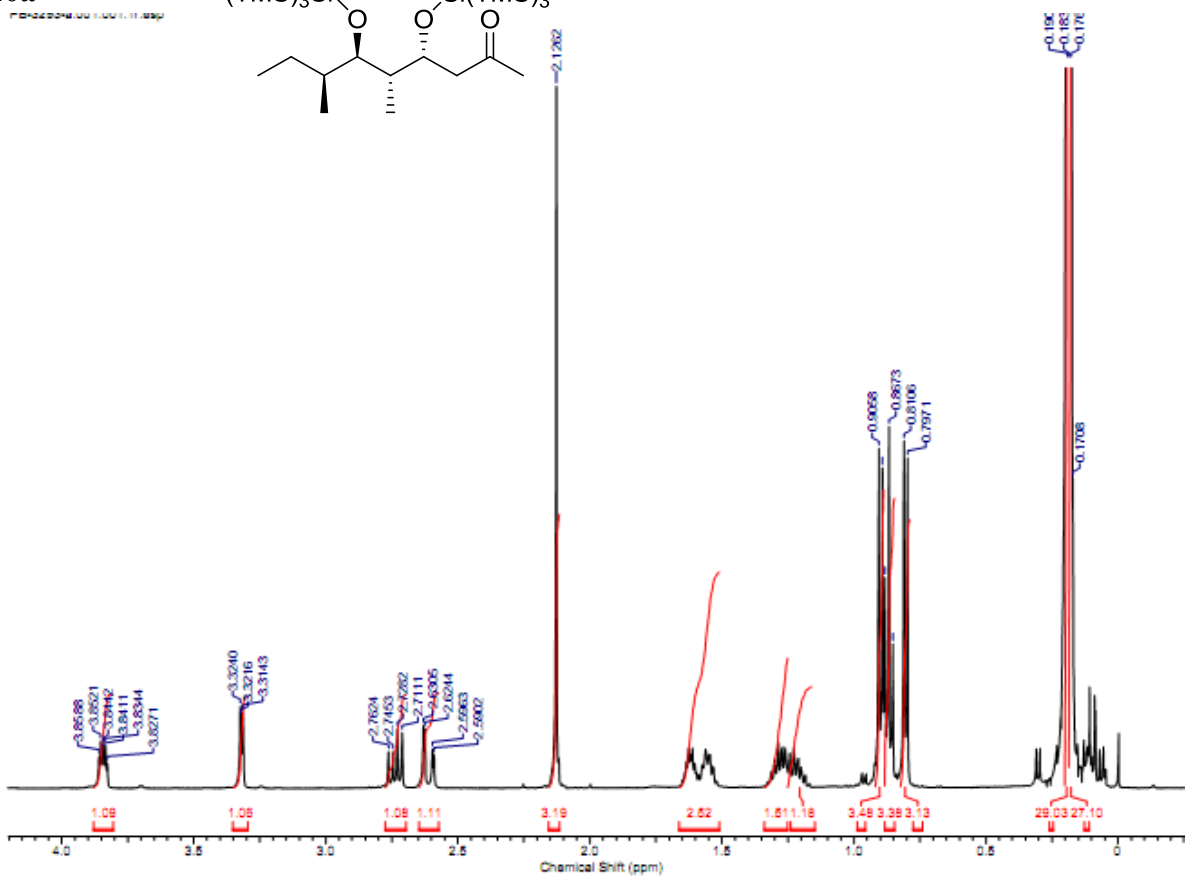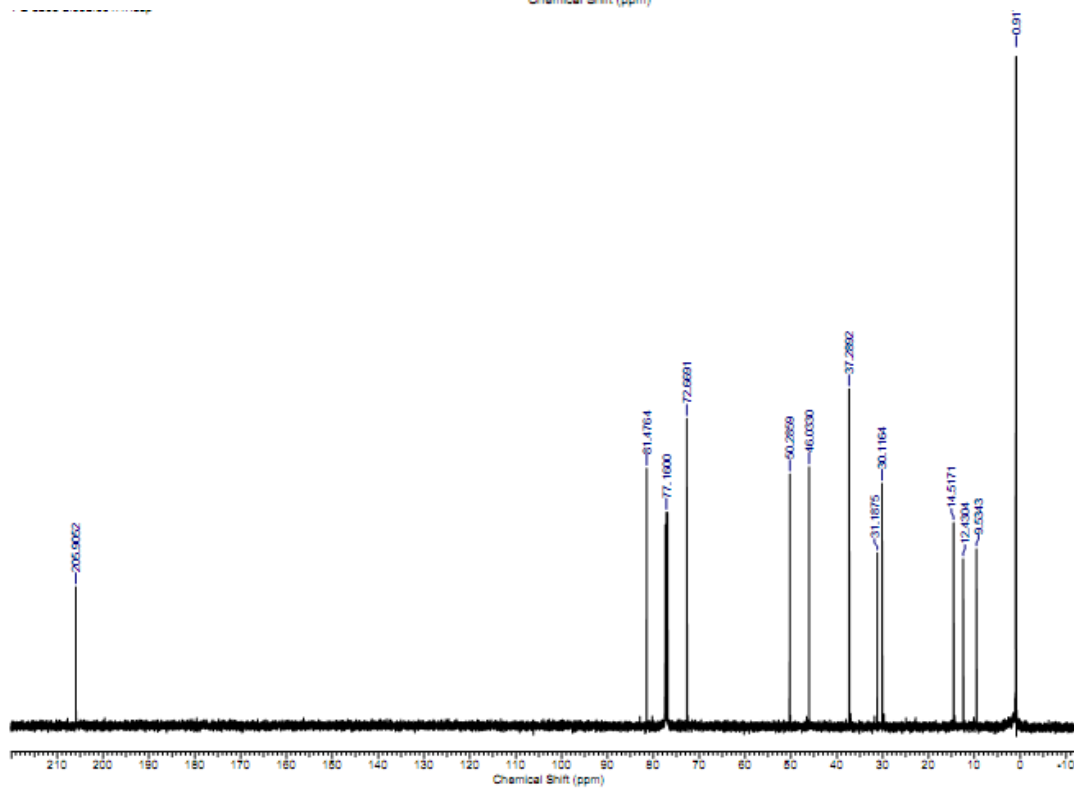

20b

This report was created by ACD/NMR Processor Academic Edition. For more information go to [www.acdlabs.com/nmrproc/](http://www.acdlabs.com/nmrproc/)  
B-6097A-b.001.001.1r.esp

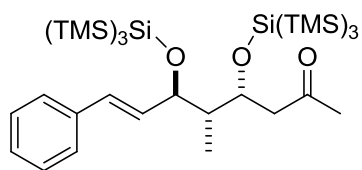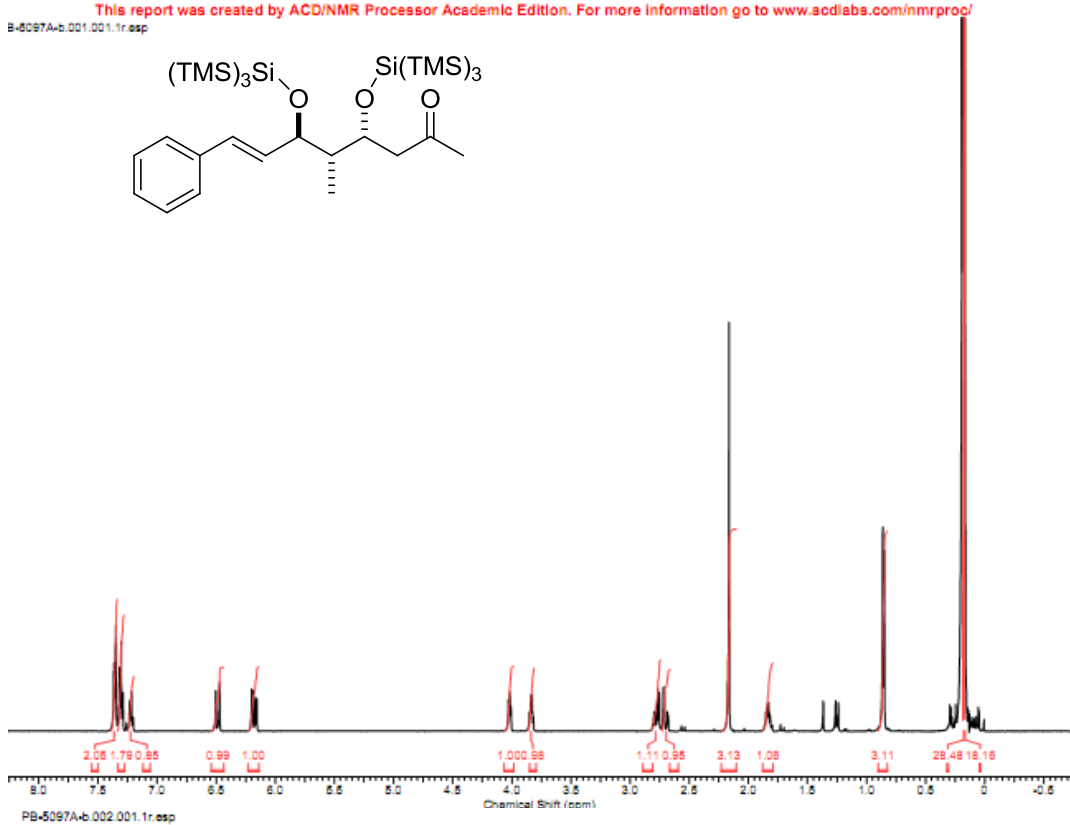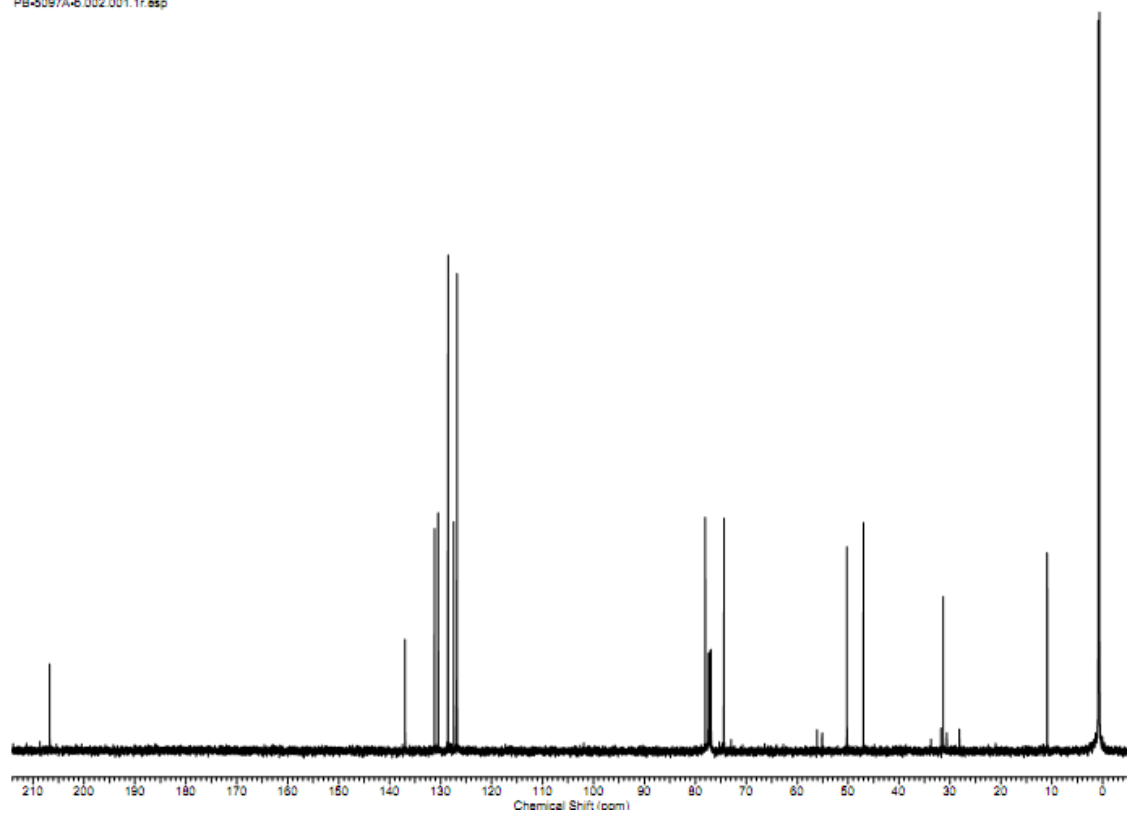

### 20d

PE-3058.004.001.1r.esp

This report was created by ACD/MSI Processor Academic Edition. For more information go to <http://www.acdlabs.com/pe/pe/pe/>

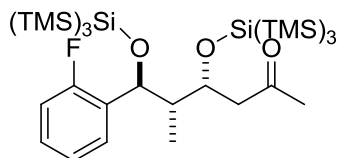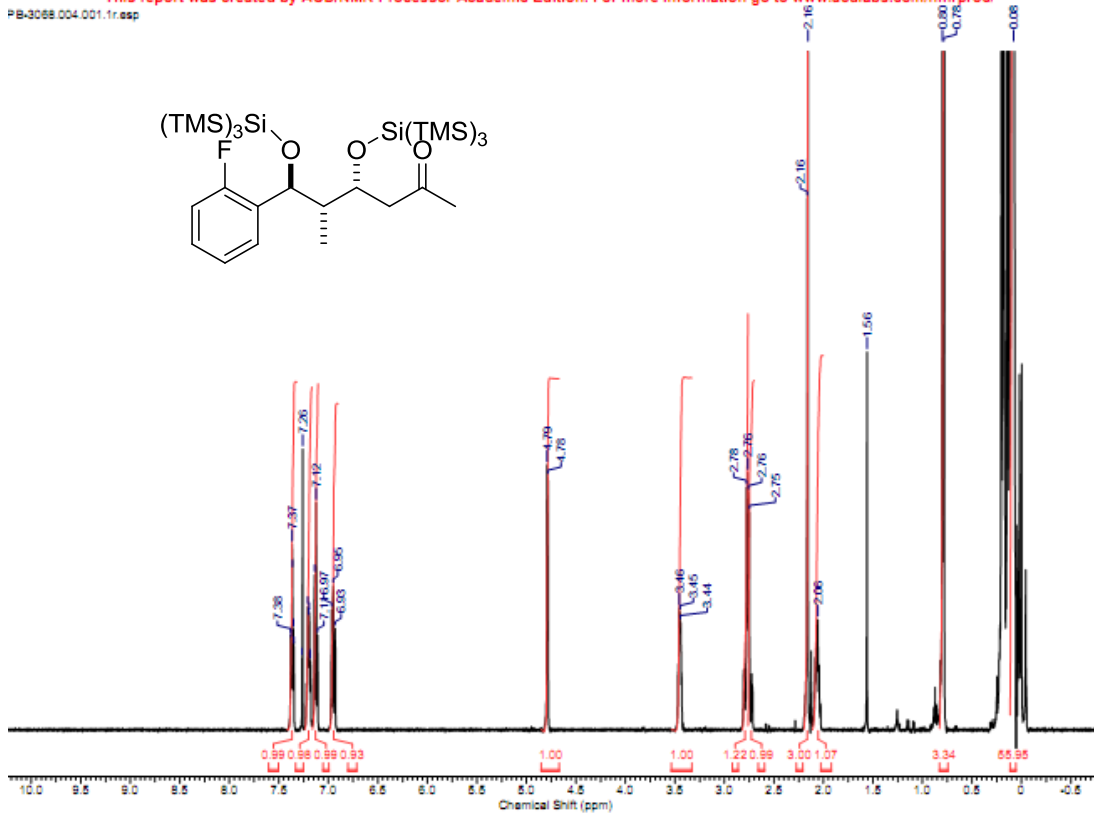

PE-3058.004.001.1r.esp

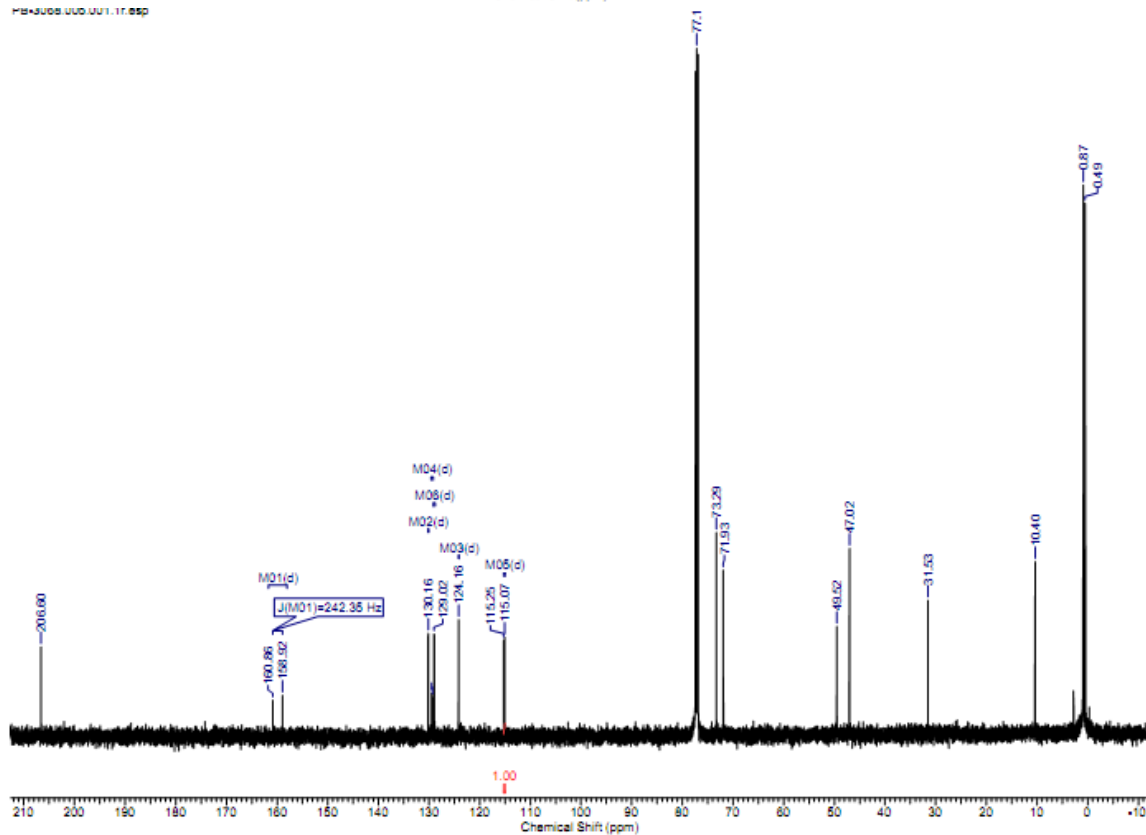



20e

PB-3199-a.001.001.1f.esp

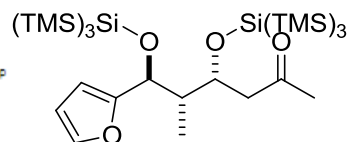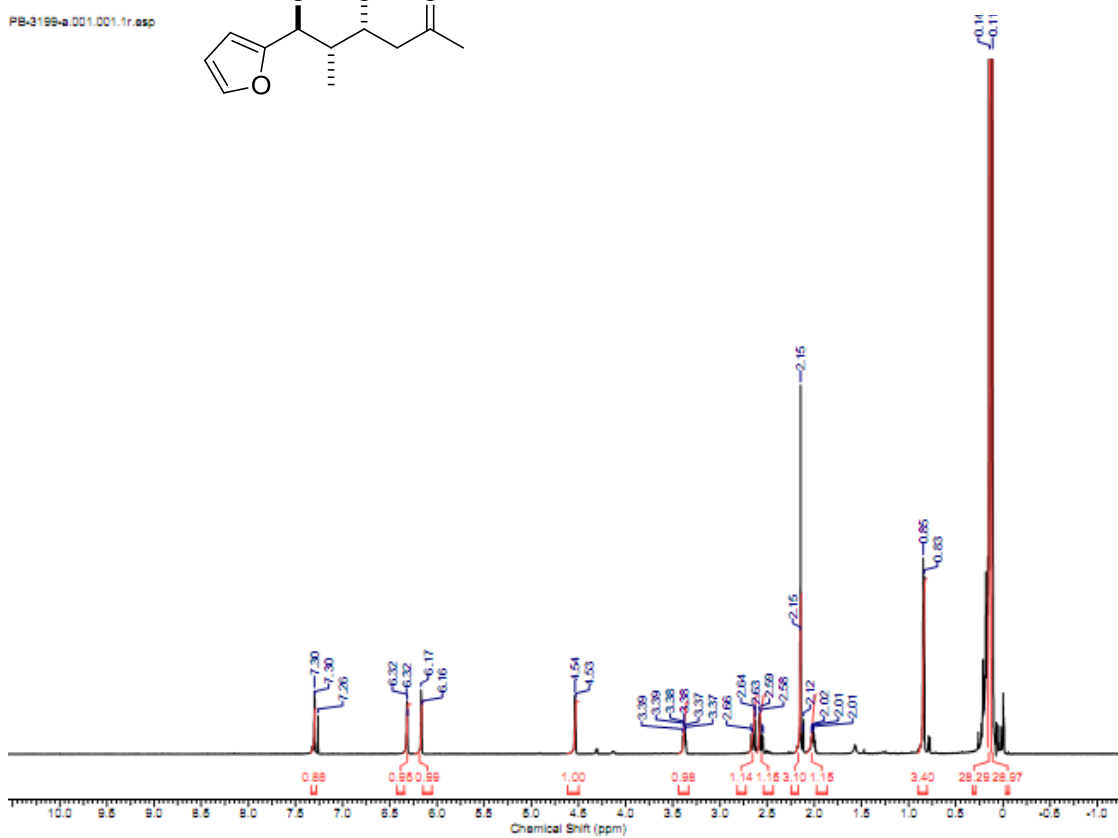

PB-3199-a.002.001.1f.esp

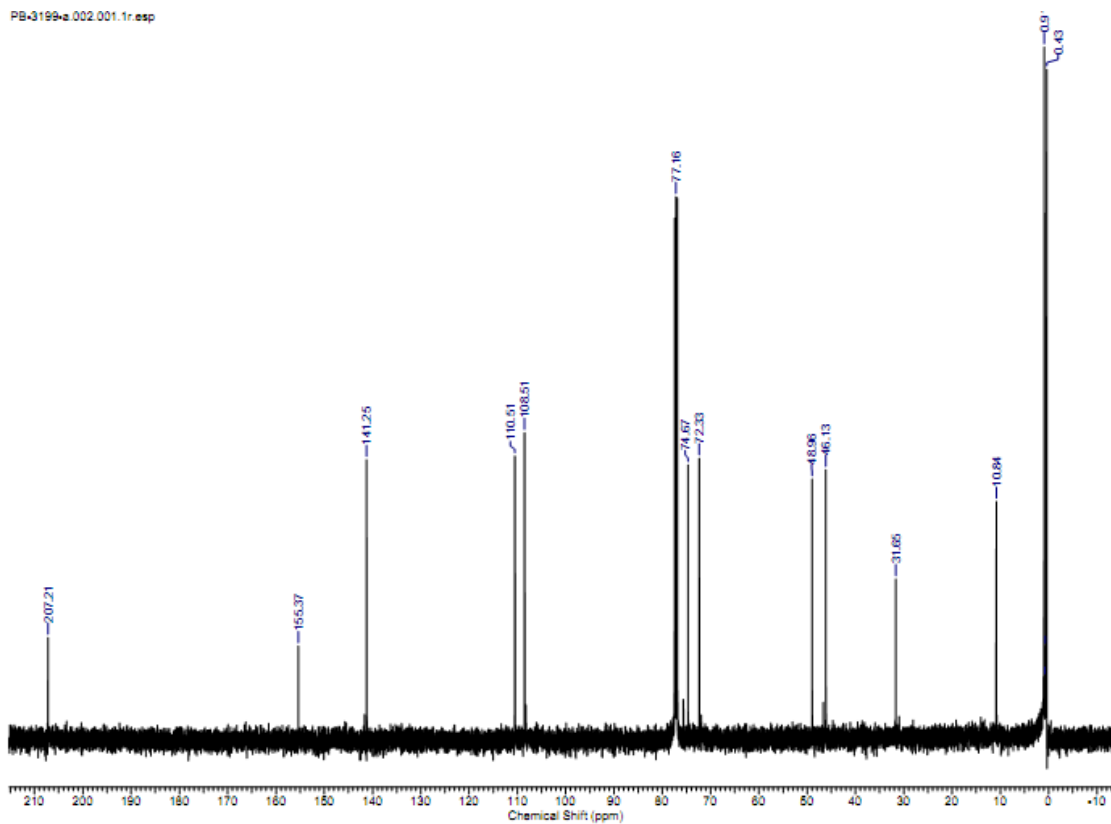

20f

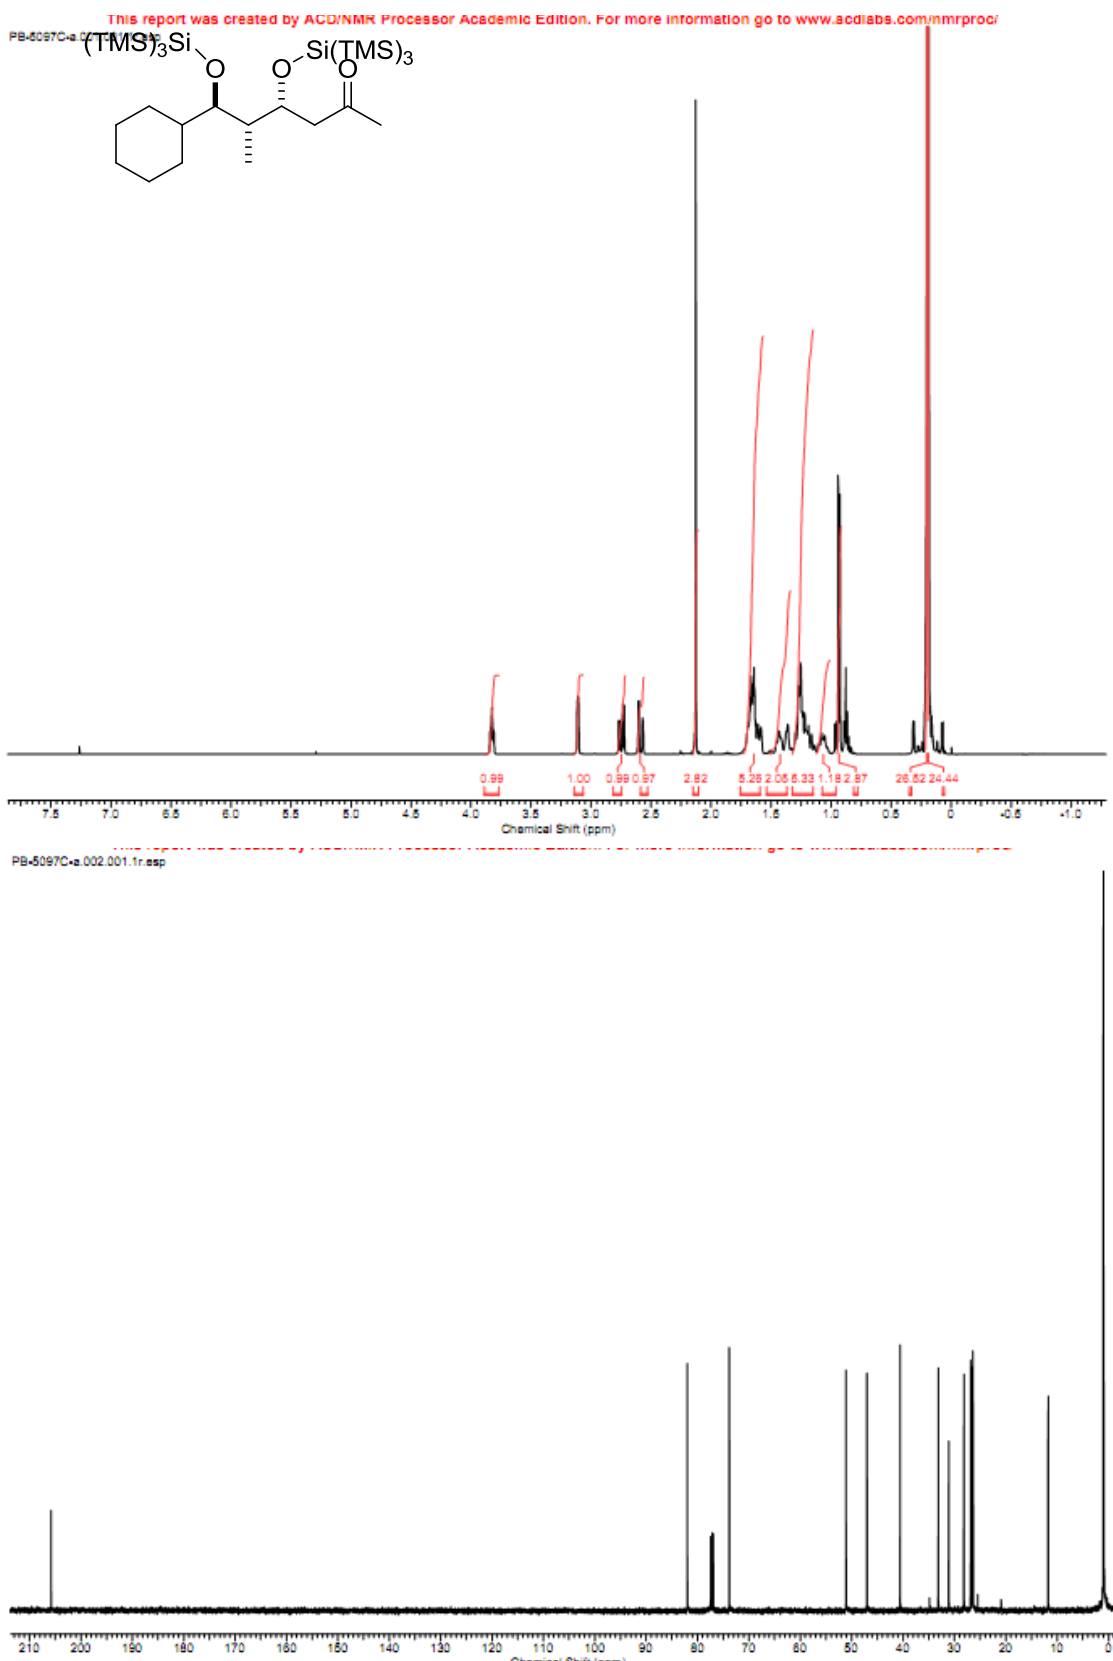

21a

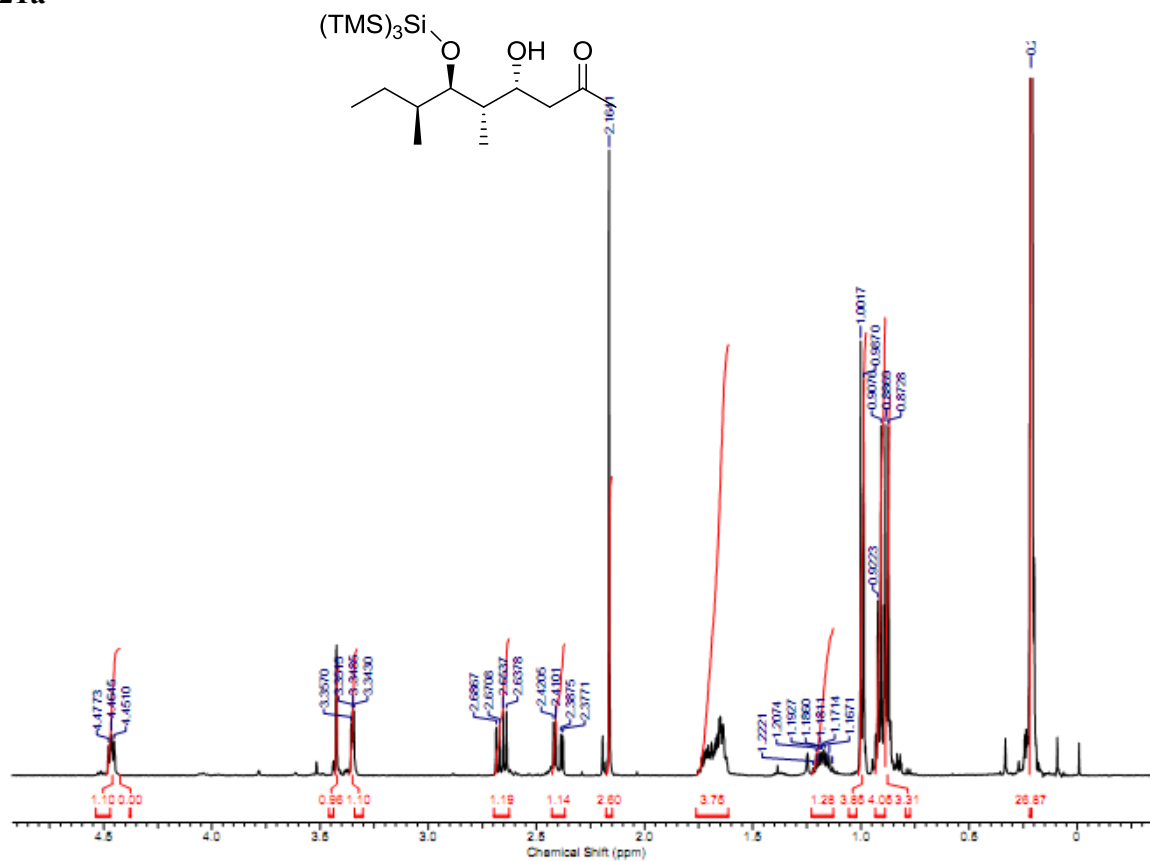

PB4093-b-002.001.f1r.esp

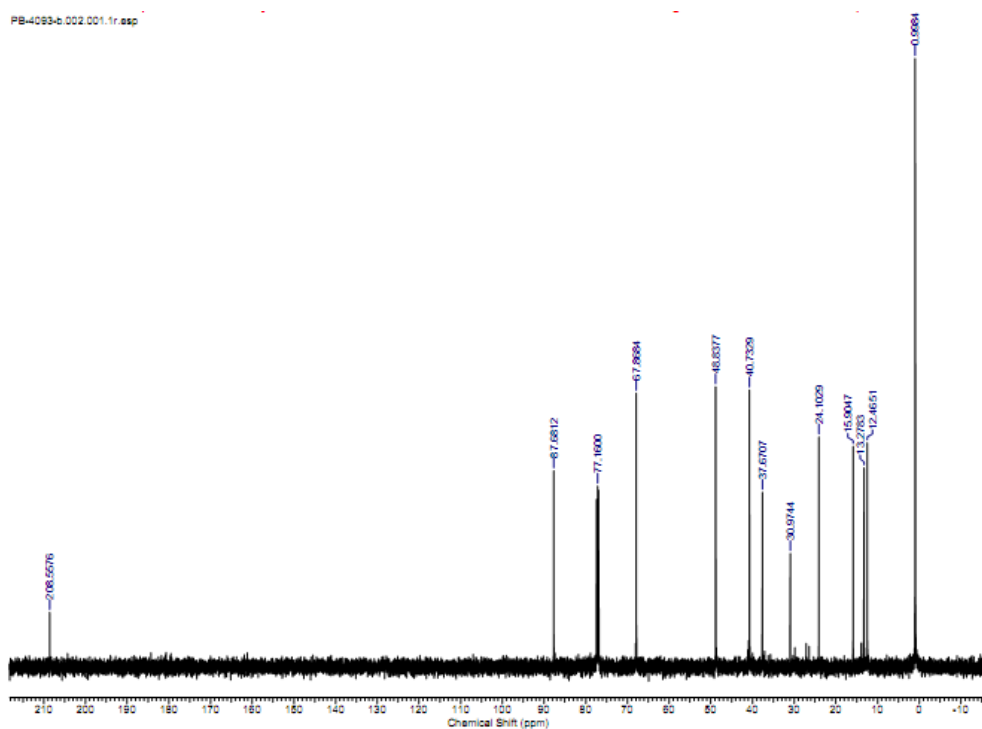

22a

PB-4124-a.001.001.1r.esp

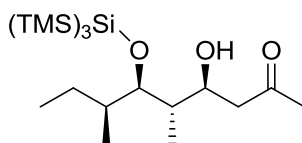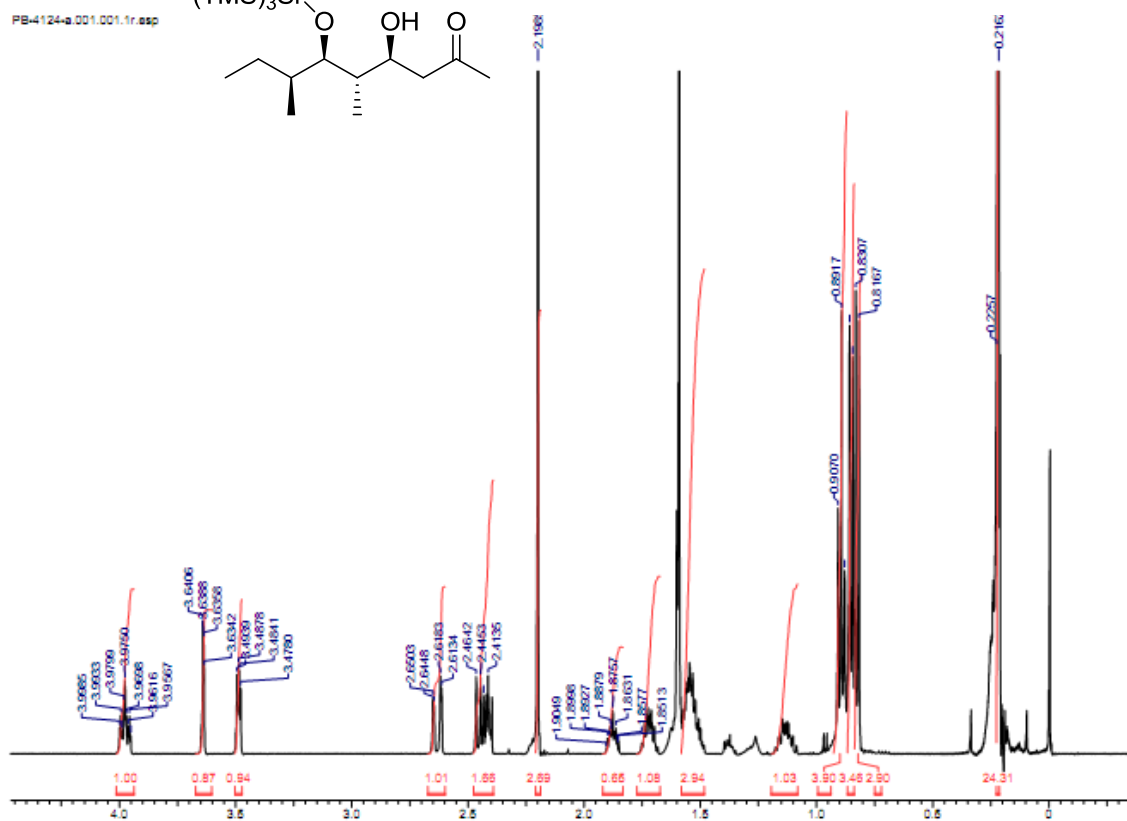

PB-4120-a2.002.001.1r.esp

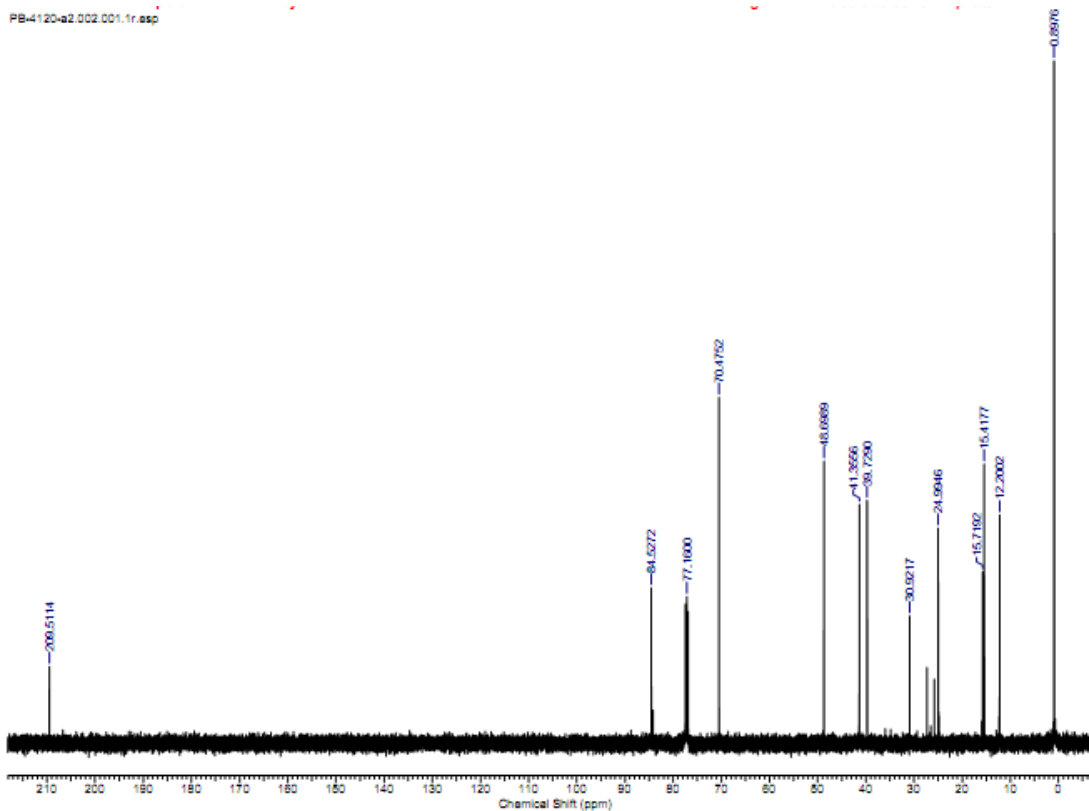

**22b**

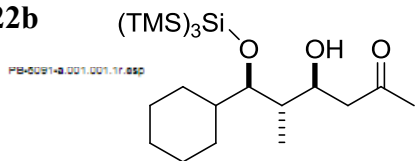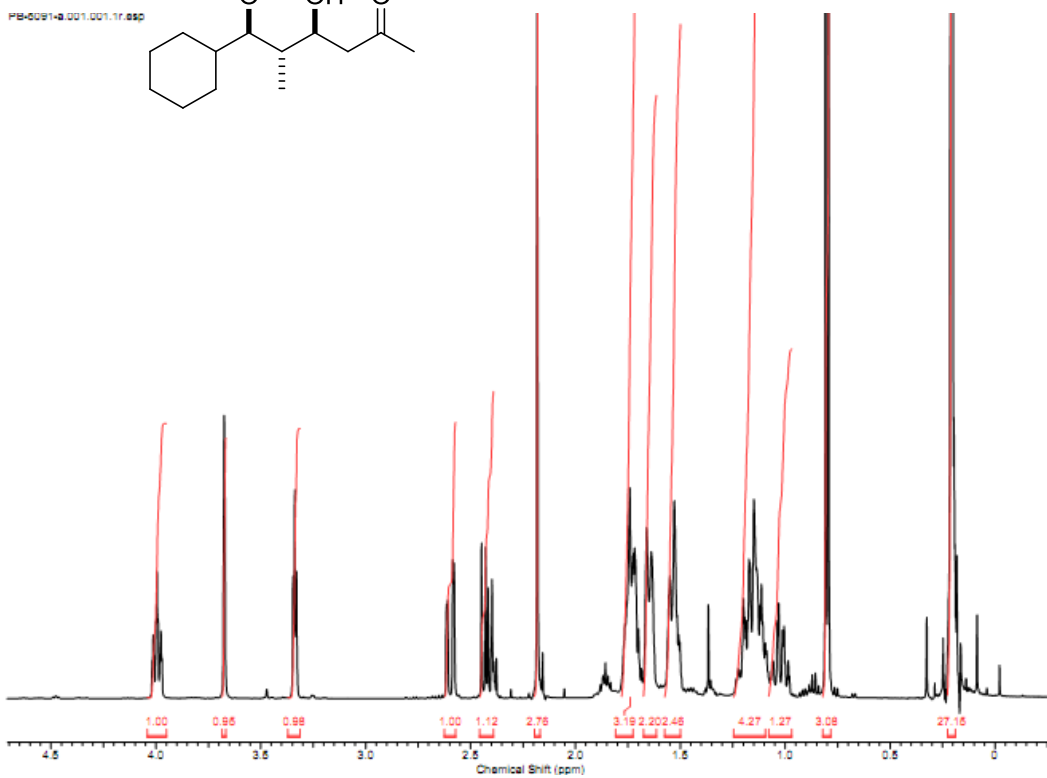

PE-5091-a.002.001.1r.esp

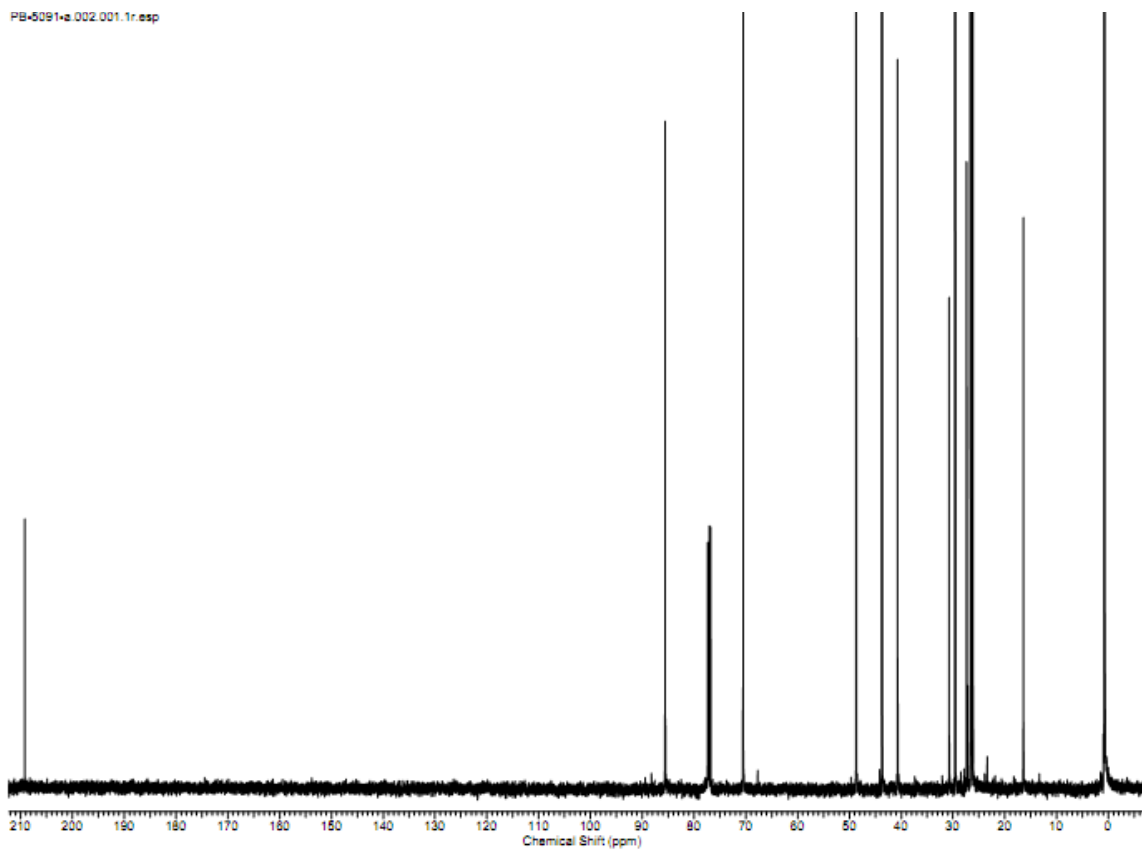

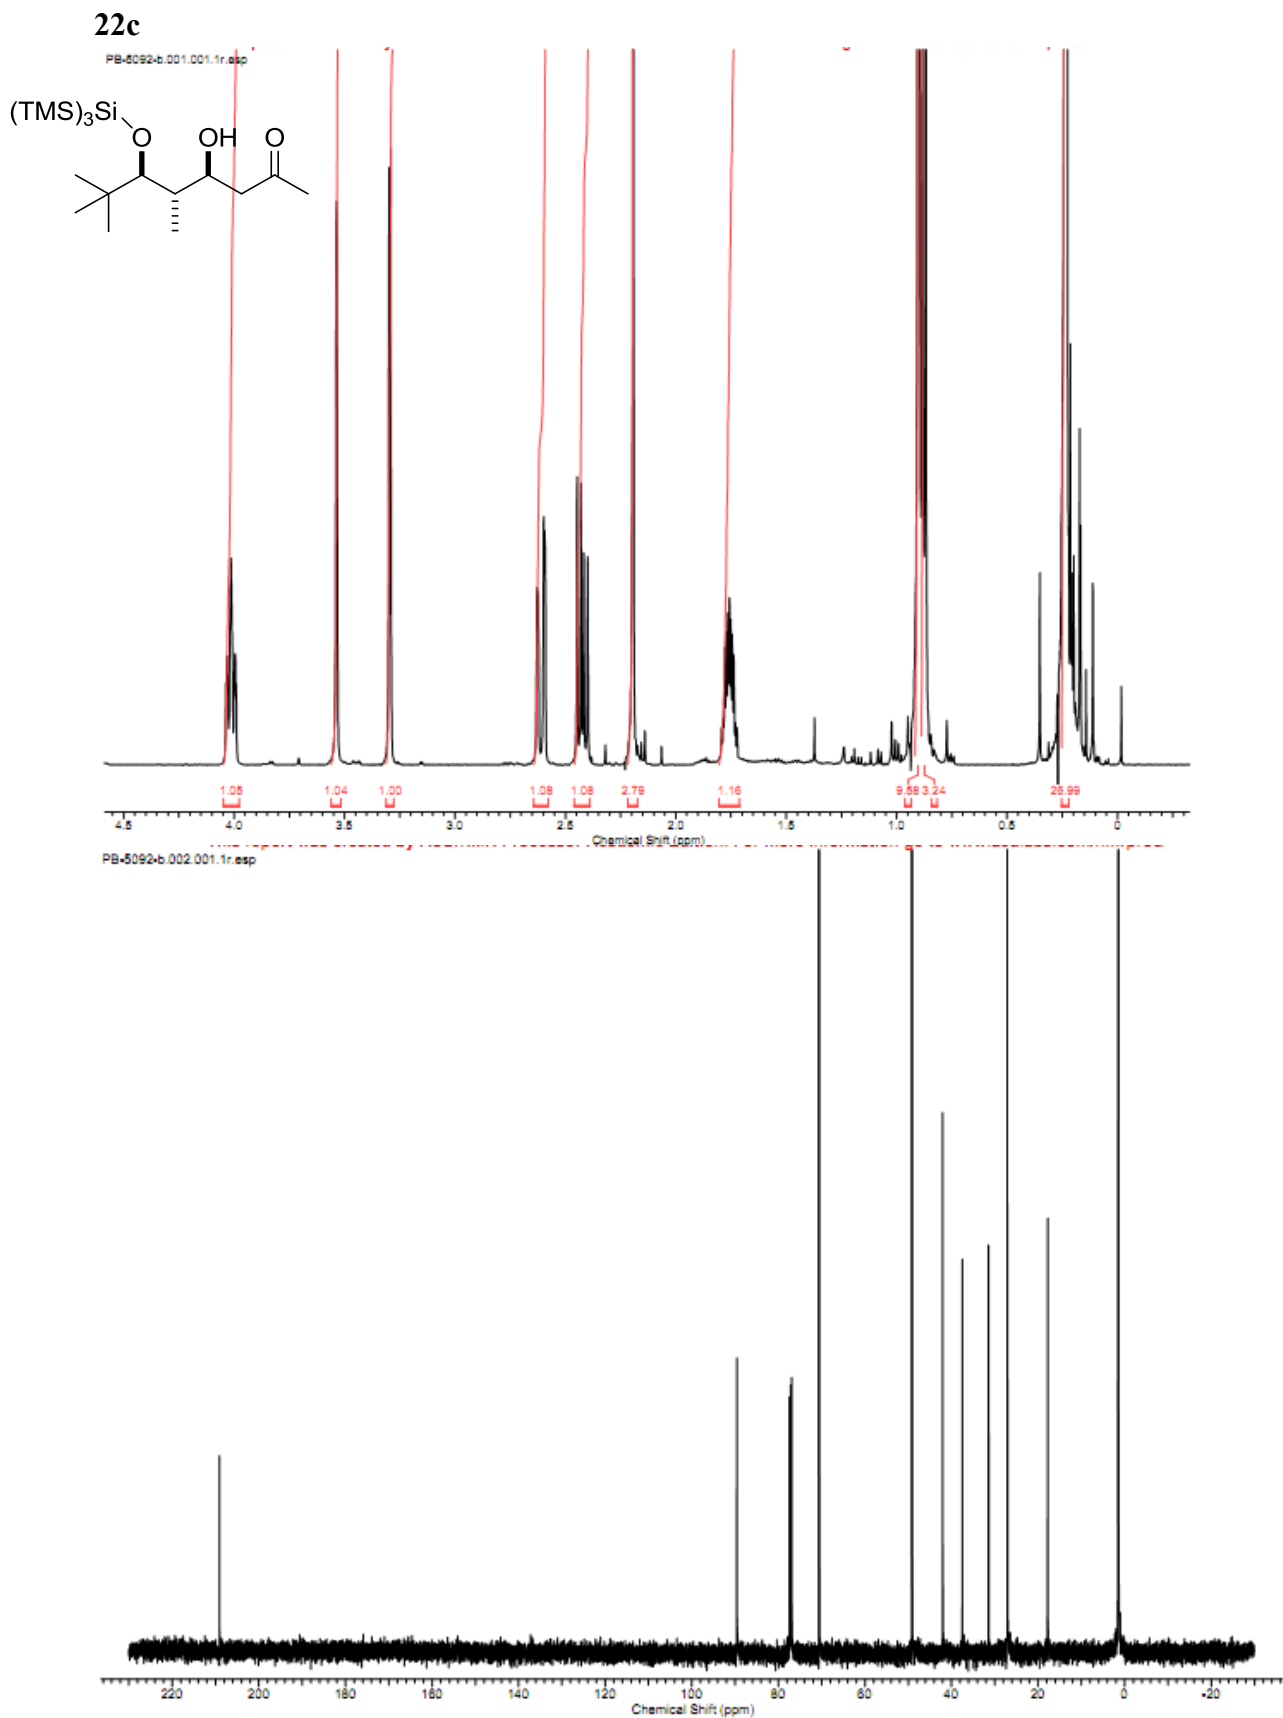

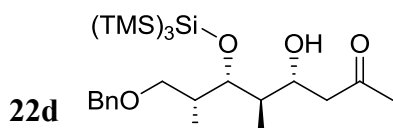

PB-5151-b.001.001.1r.esp

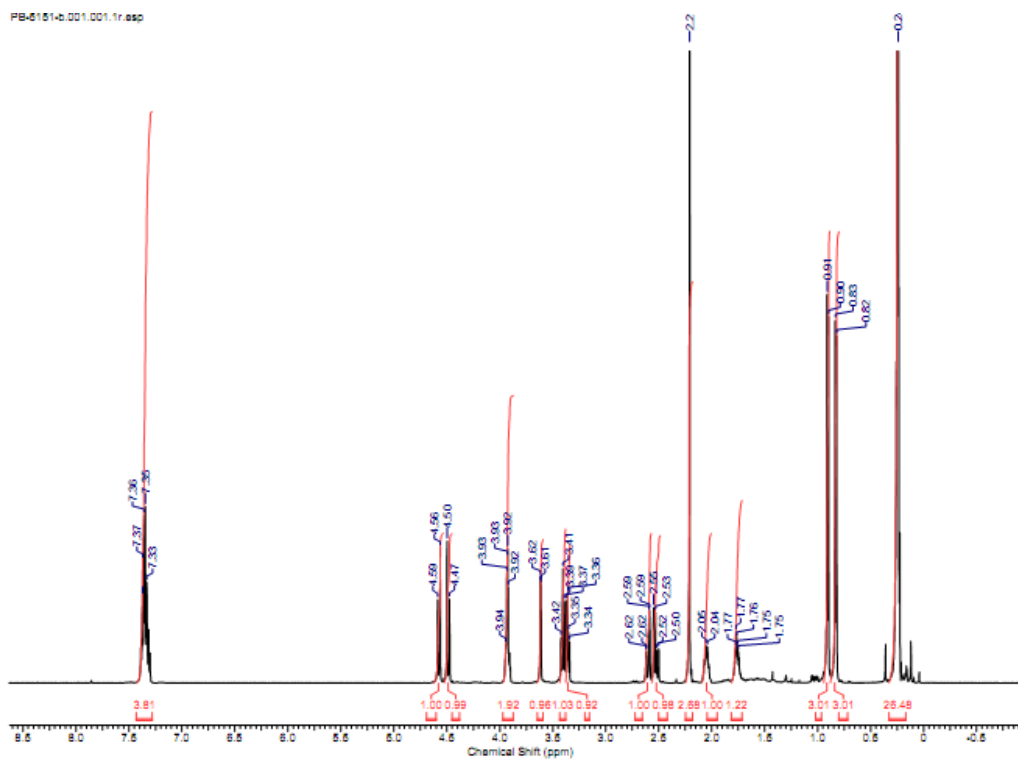

PB-5151-b.002.001.1r.esp

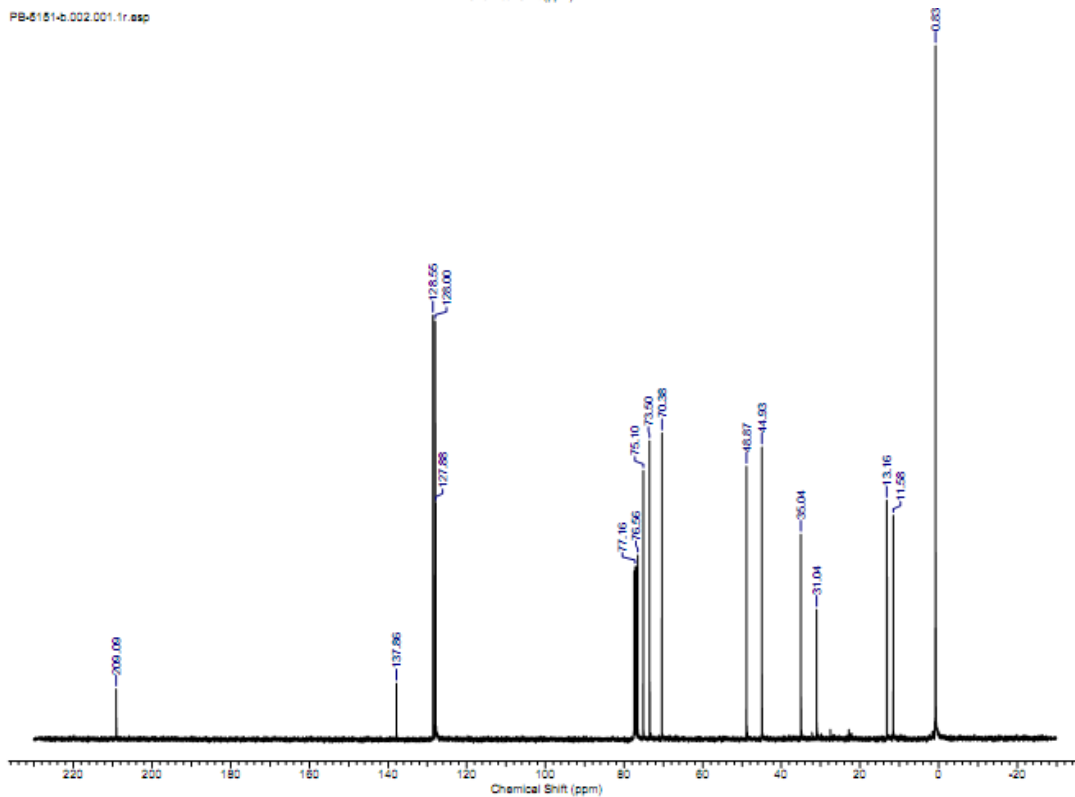

22f

PB-5093A-a.001.001.1r\_2.esp

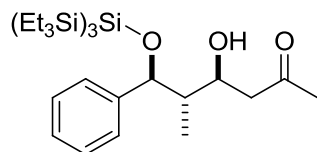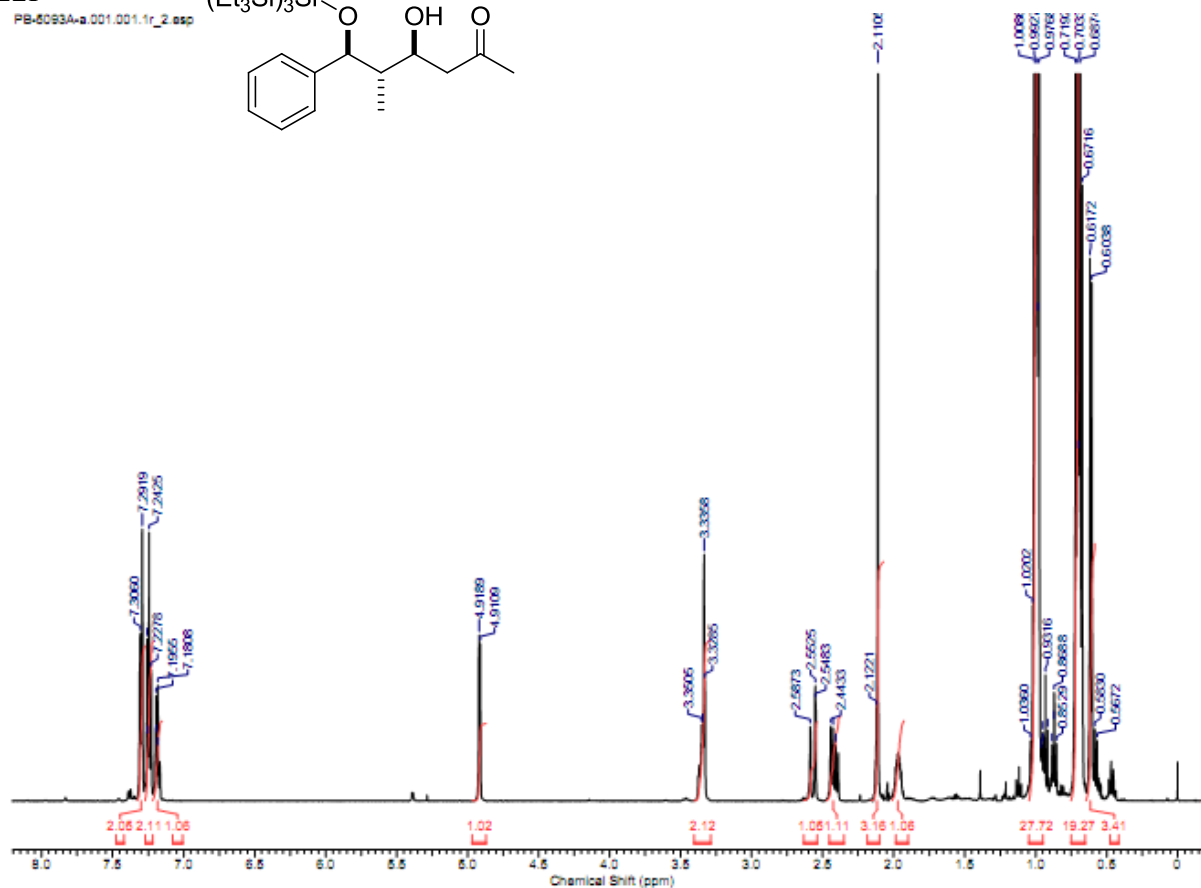

PB-5093A-a.002.001.1r.esp

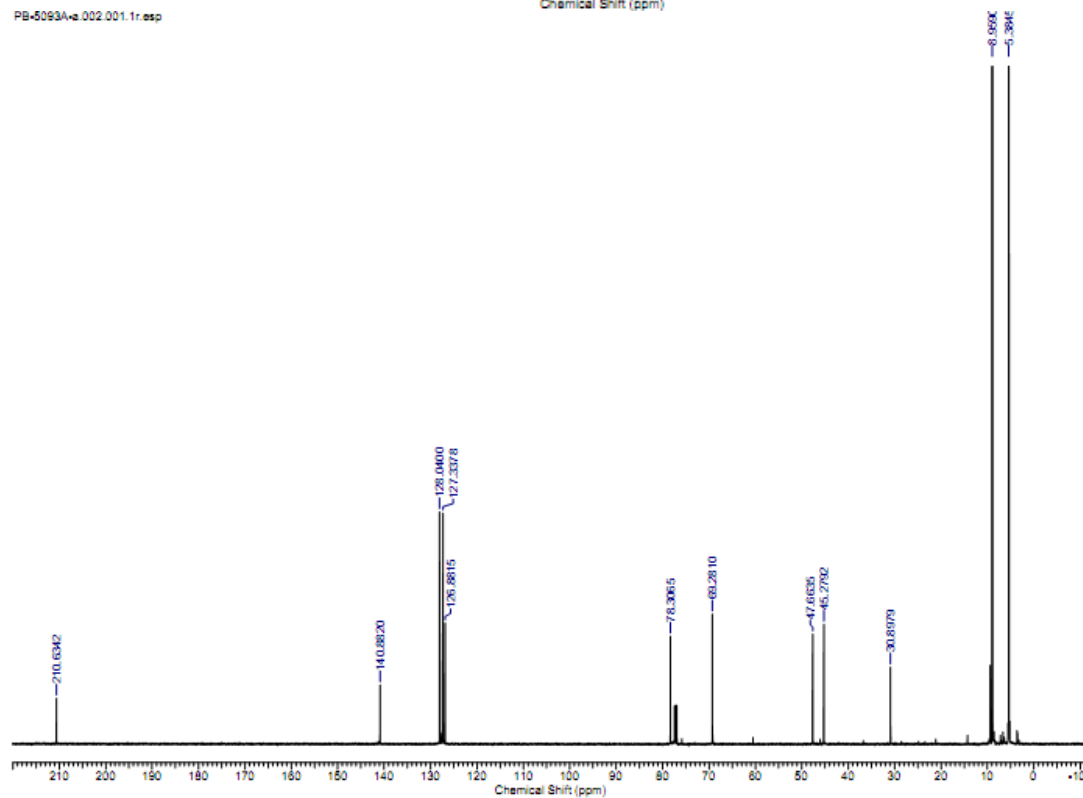



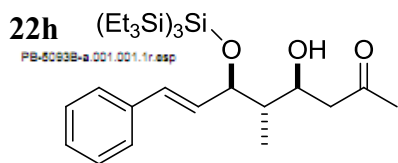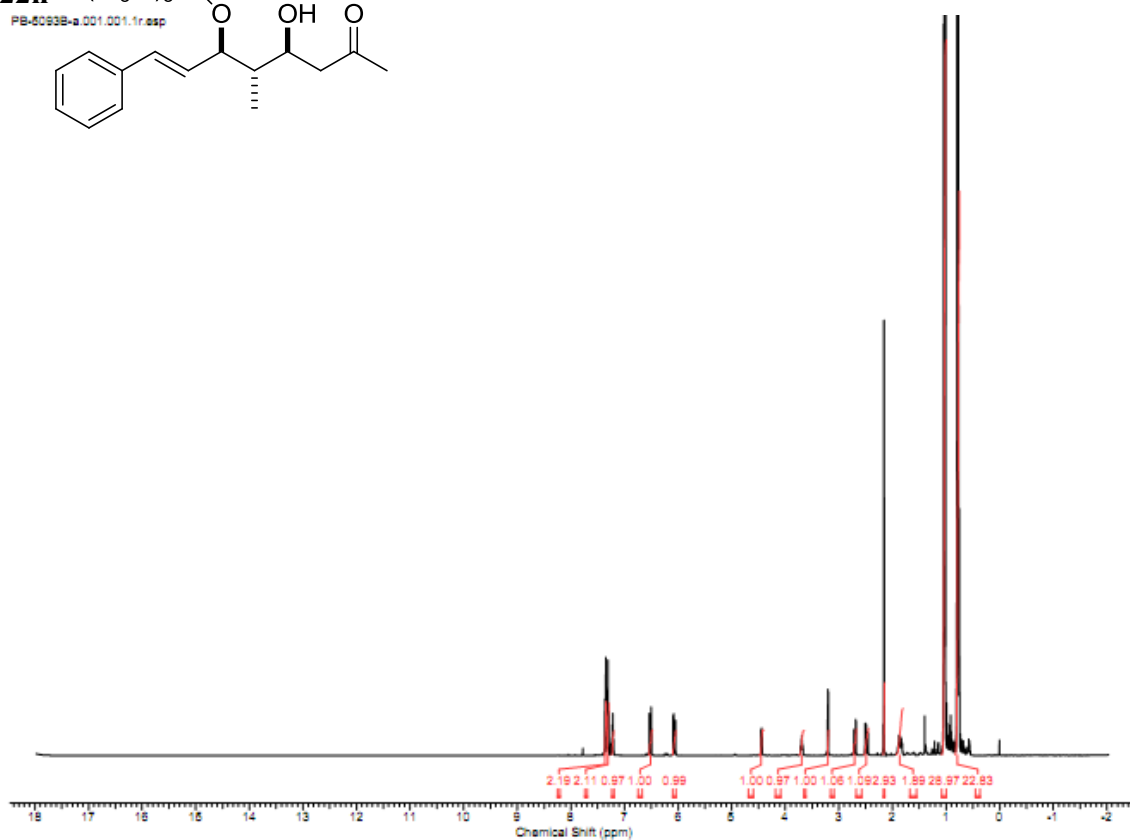

PB-5093B-a.002.001.1r.esp

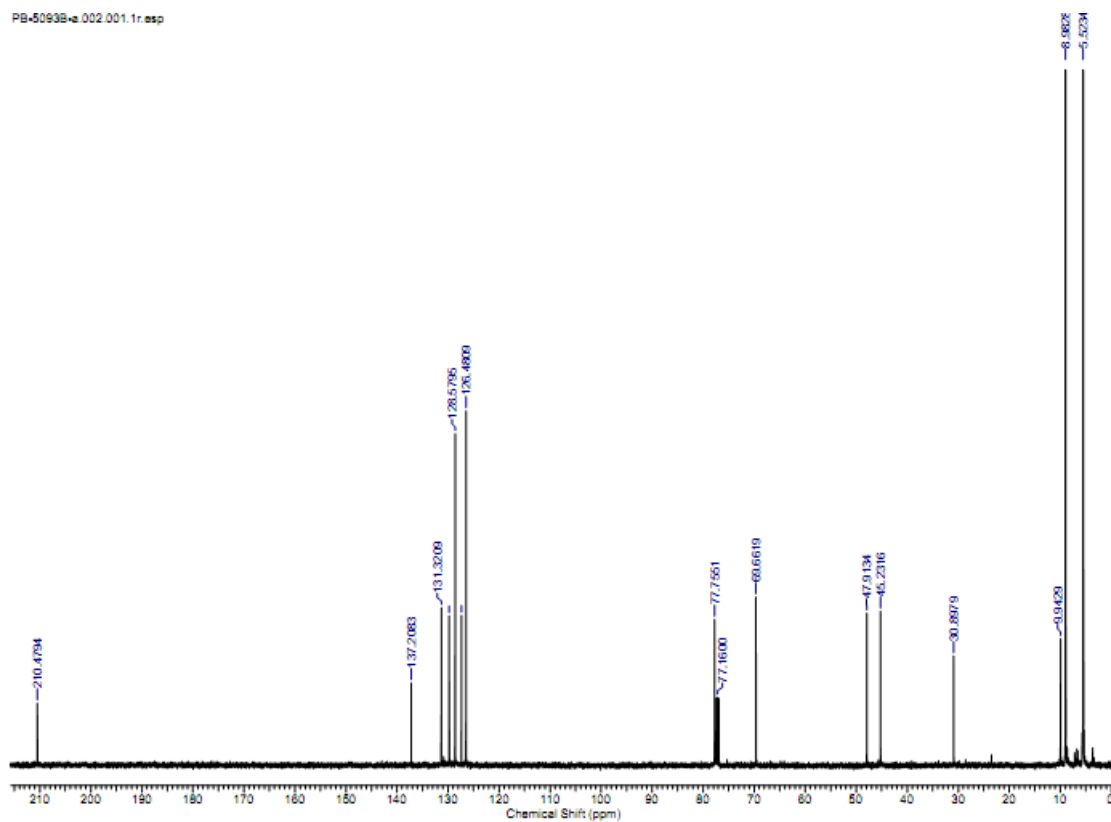

22i

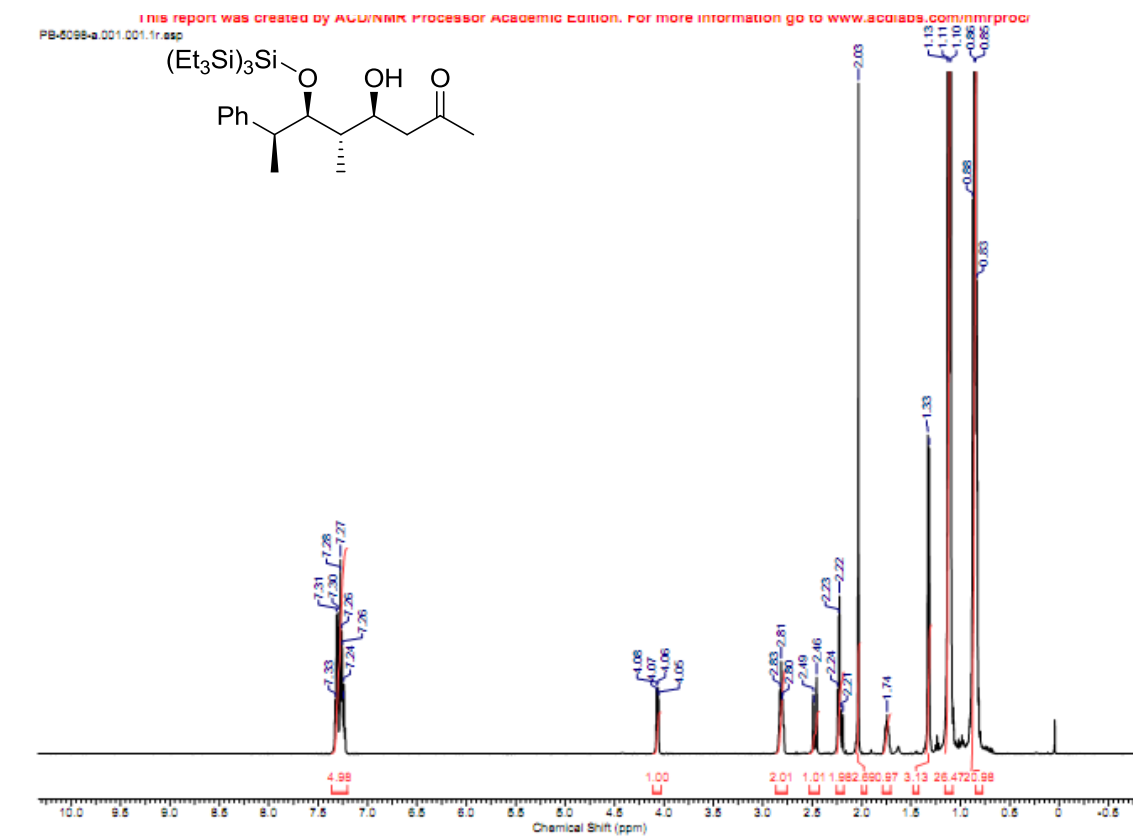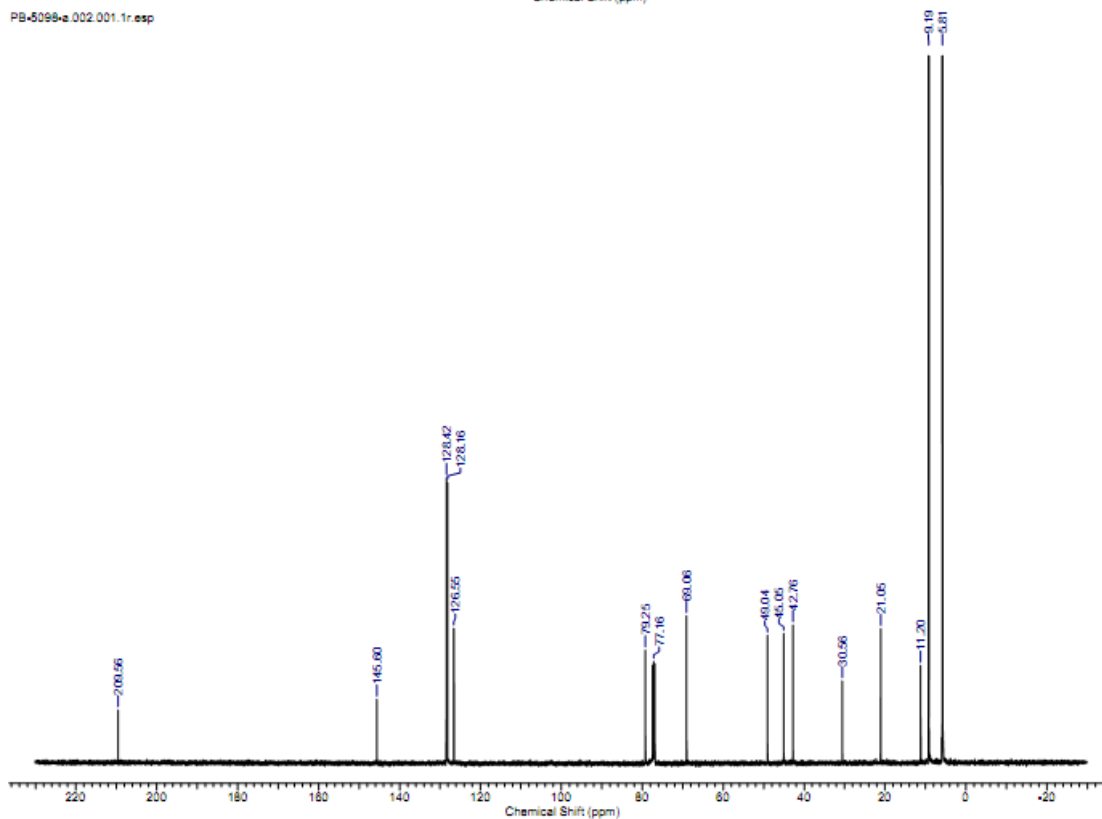

26a

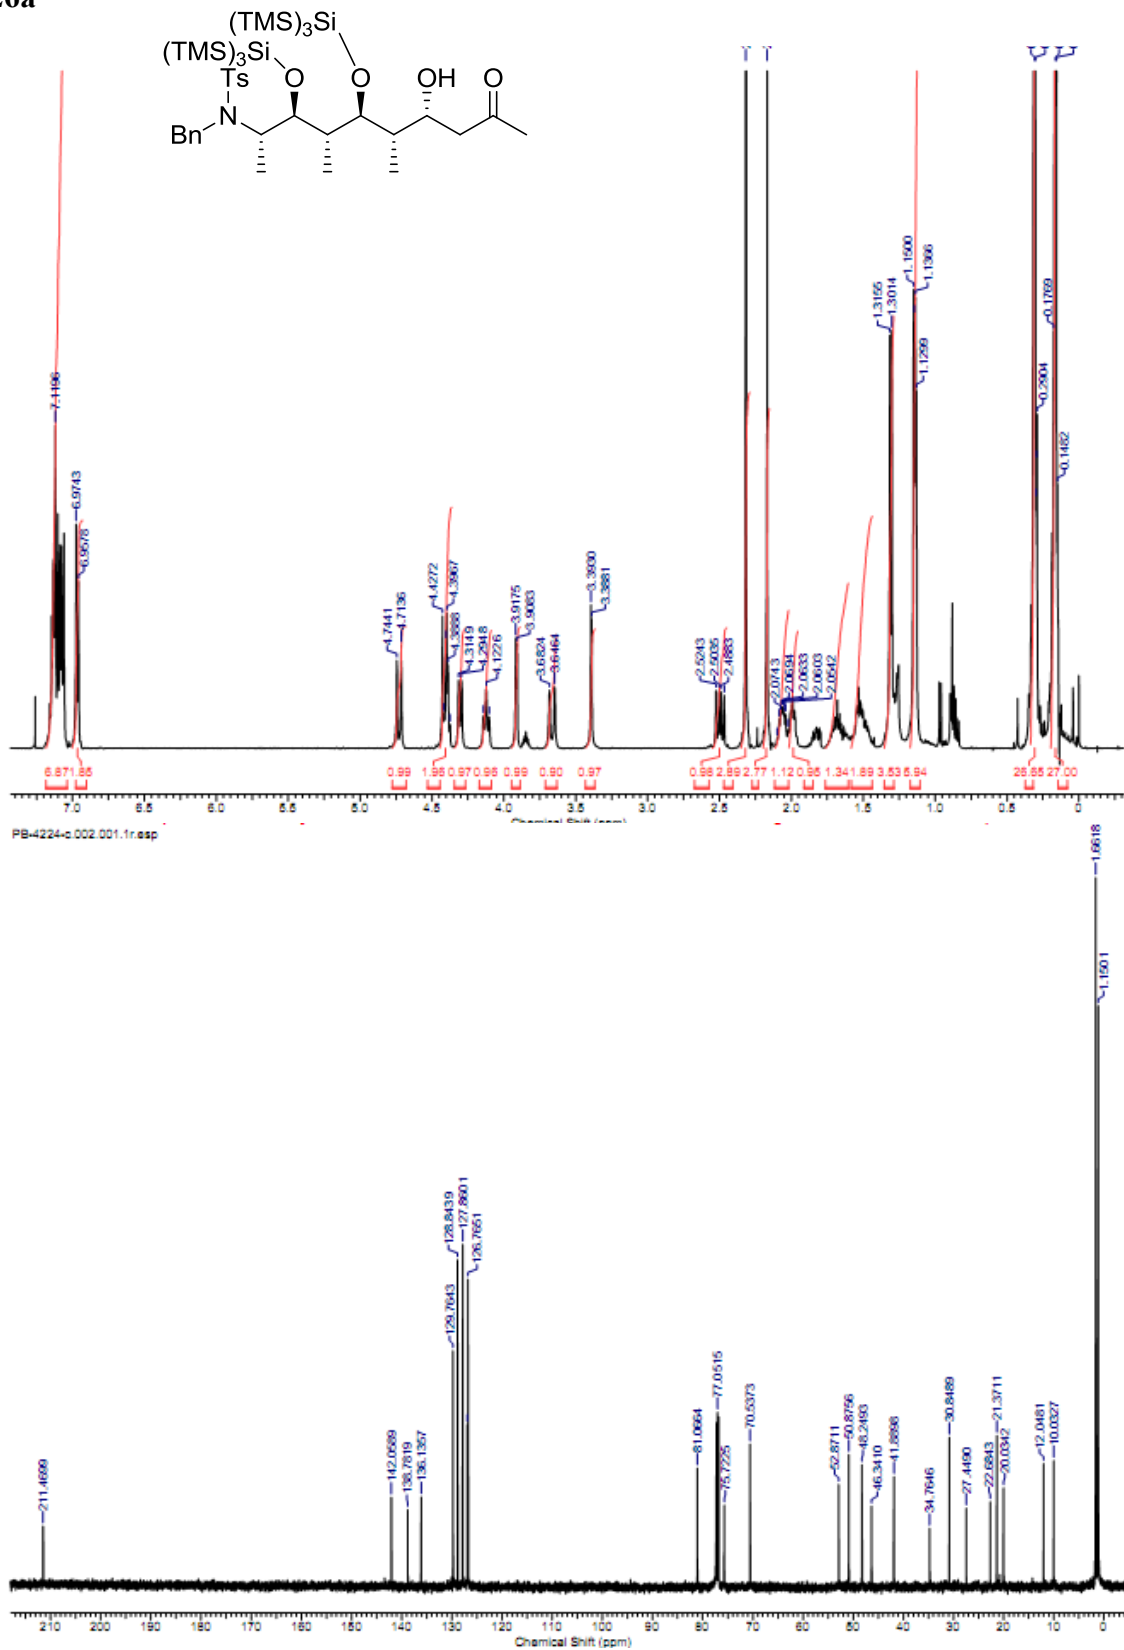

S147



### 28a

PB-3105-c.001.001.1r.esp

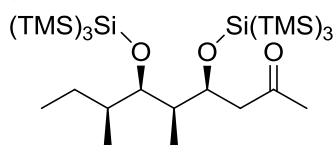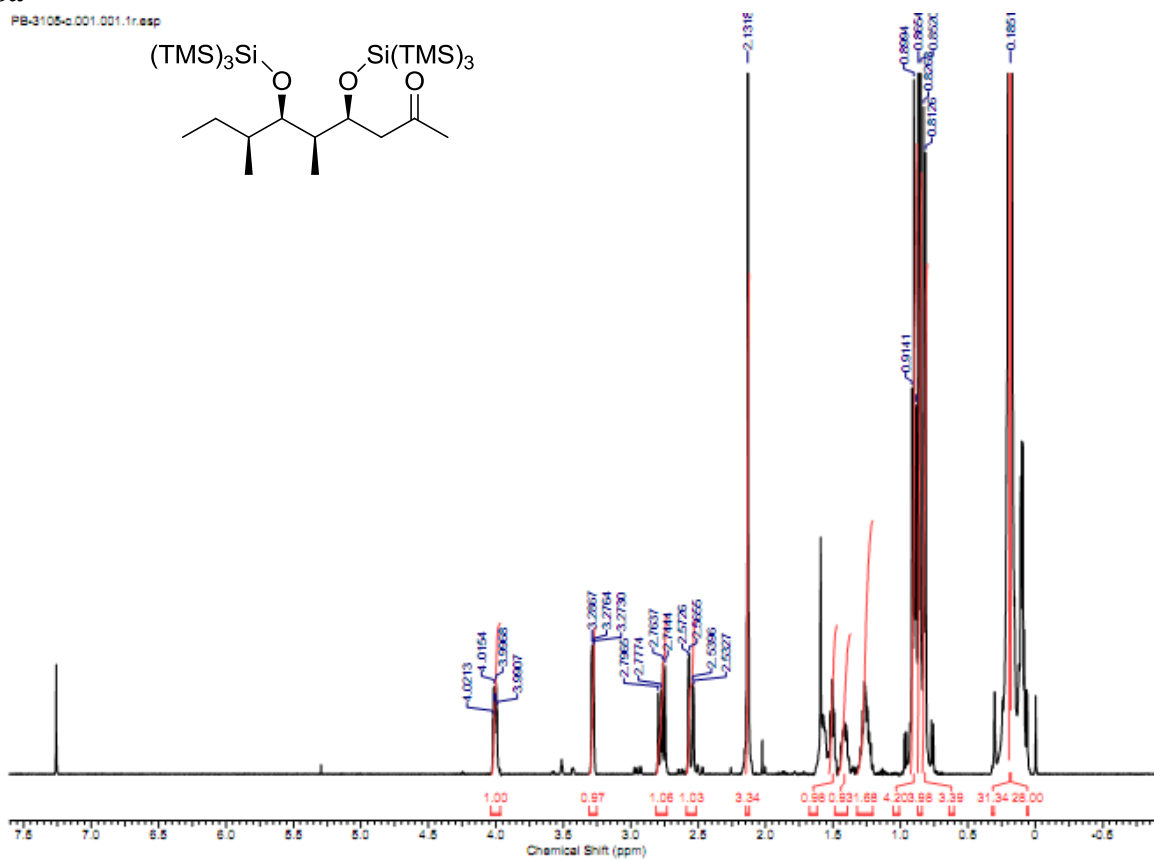

PB-3105-c.002.002.1r.esp

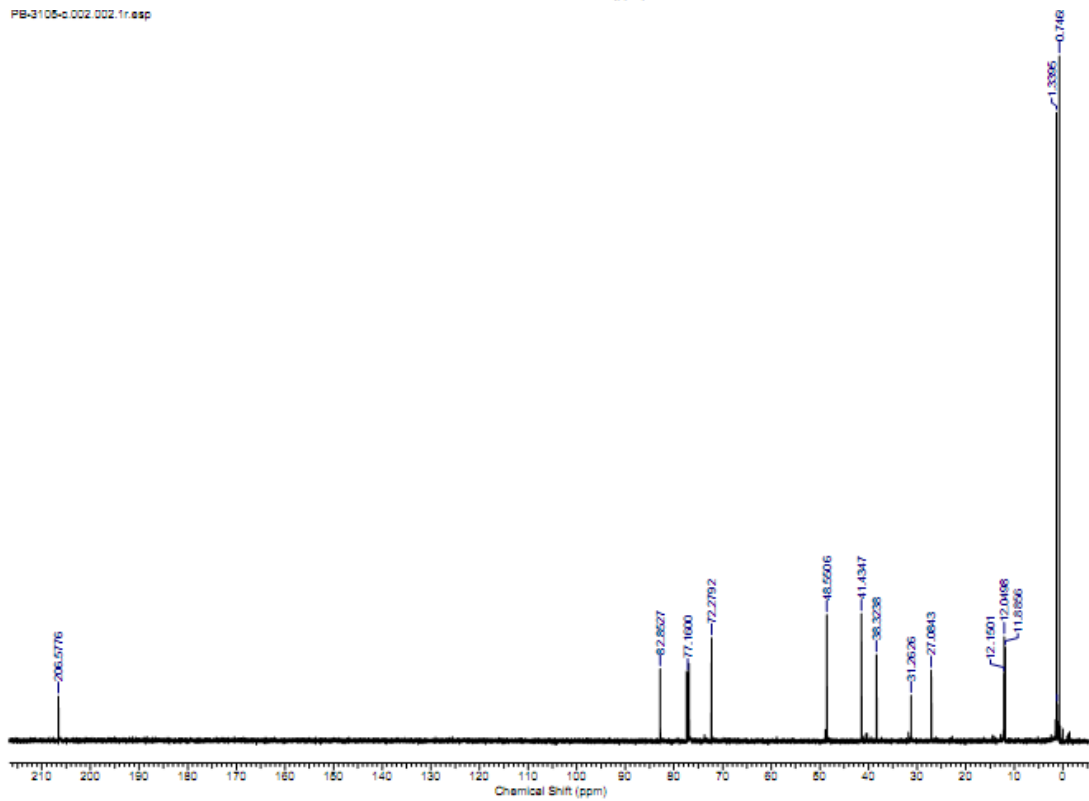

28b

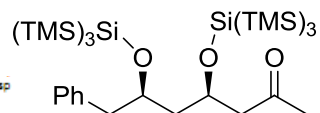

1B-5146A-b.001.001.1r.esp

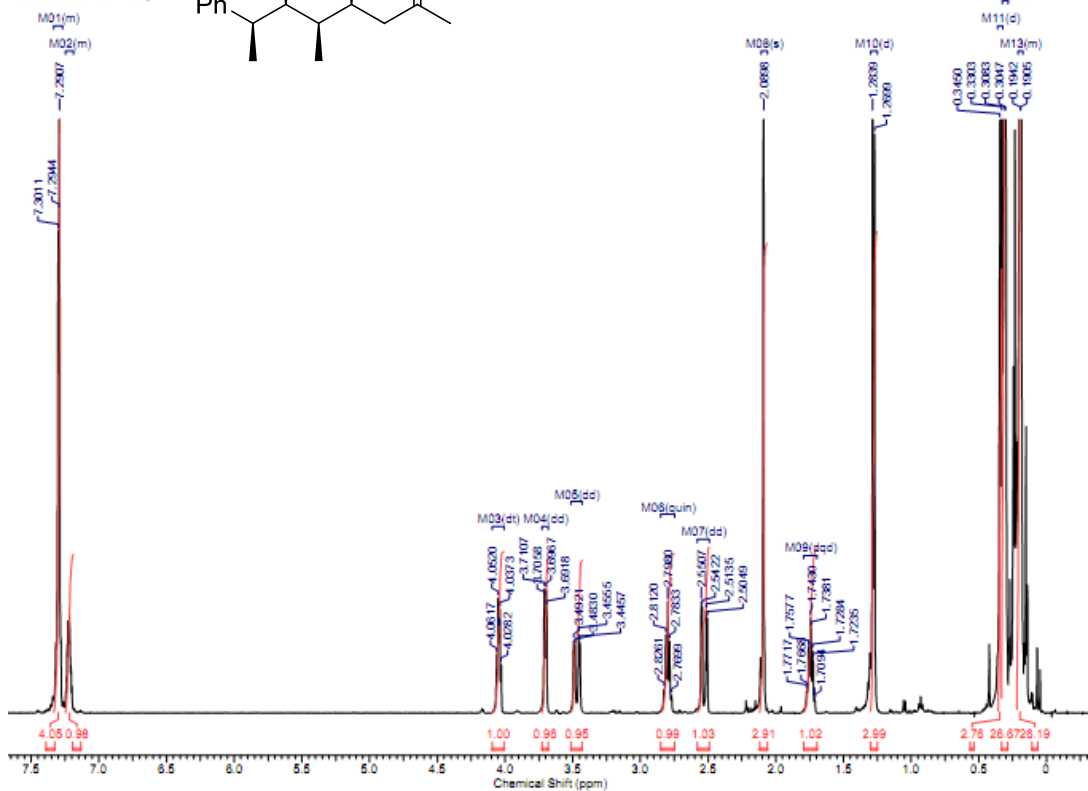

This report was created by ACD/NMR Processor Academic Edition. For more information go to [www.acdlabs.com/nmrproc/](http://www.acdlabs.com/nmrproc/)

1B-5146A-b.002.001.1r.esp

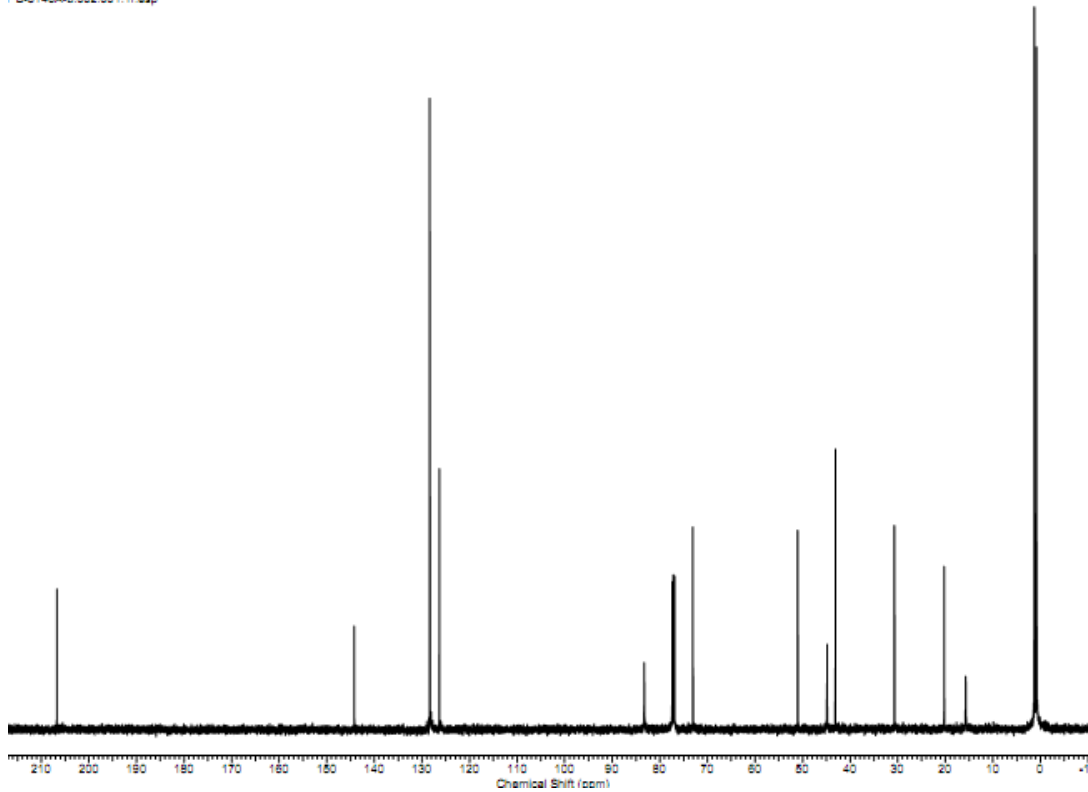

28c

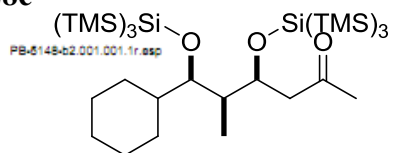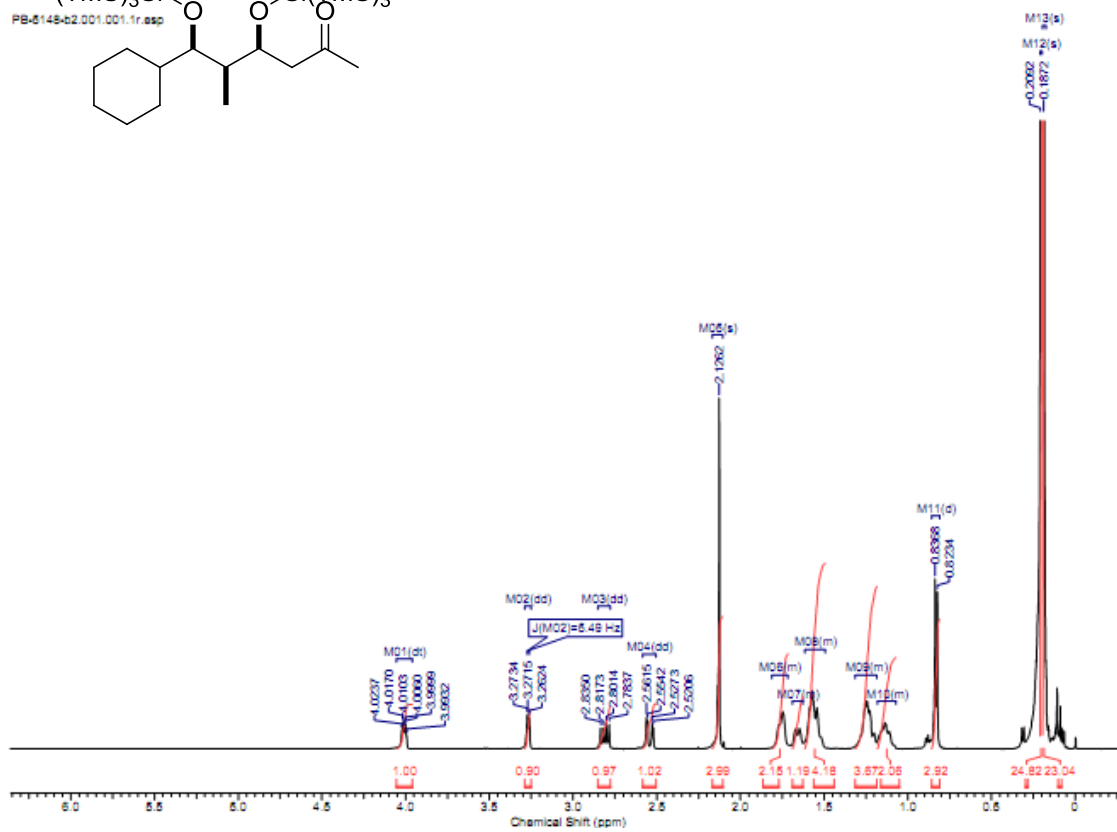

PB-5148-b2.002.001.1r.esp

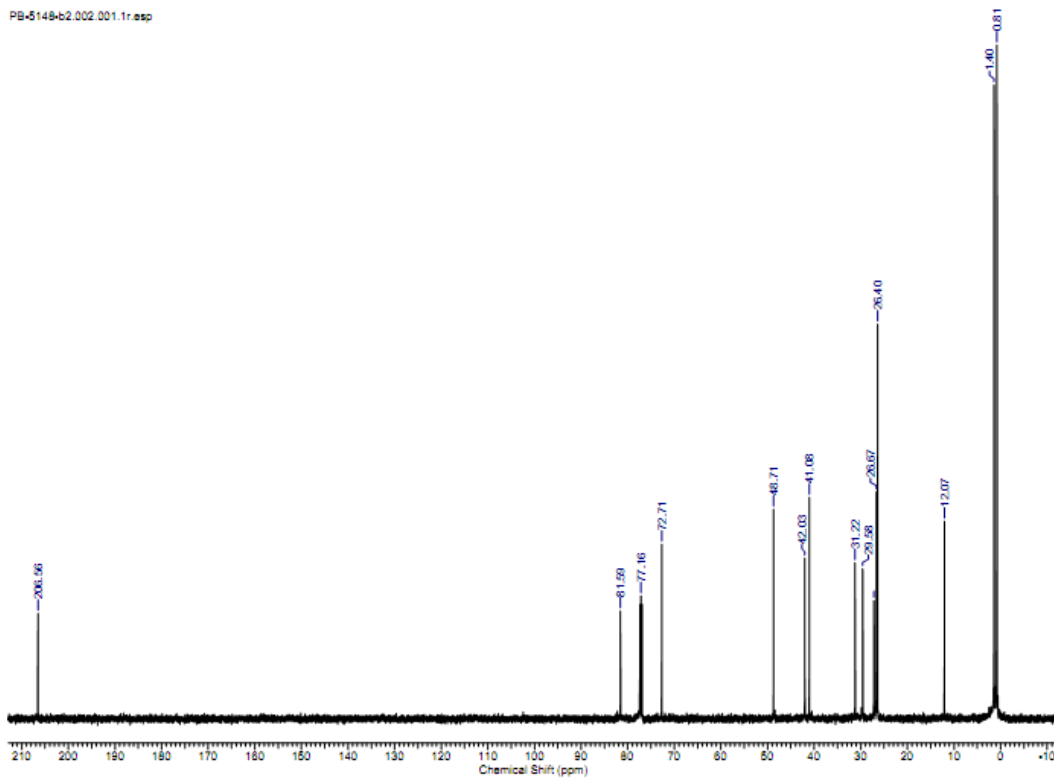

29a

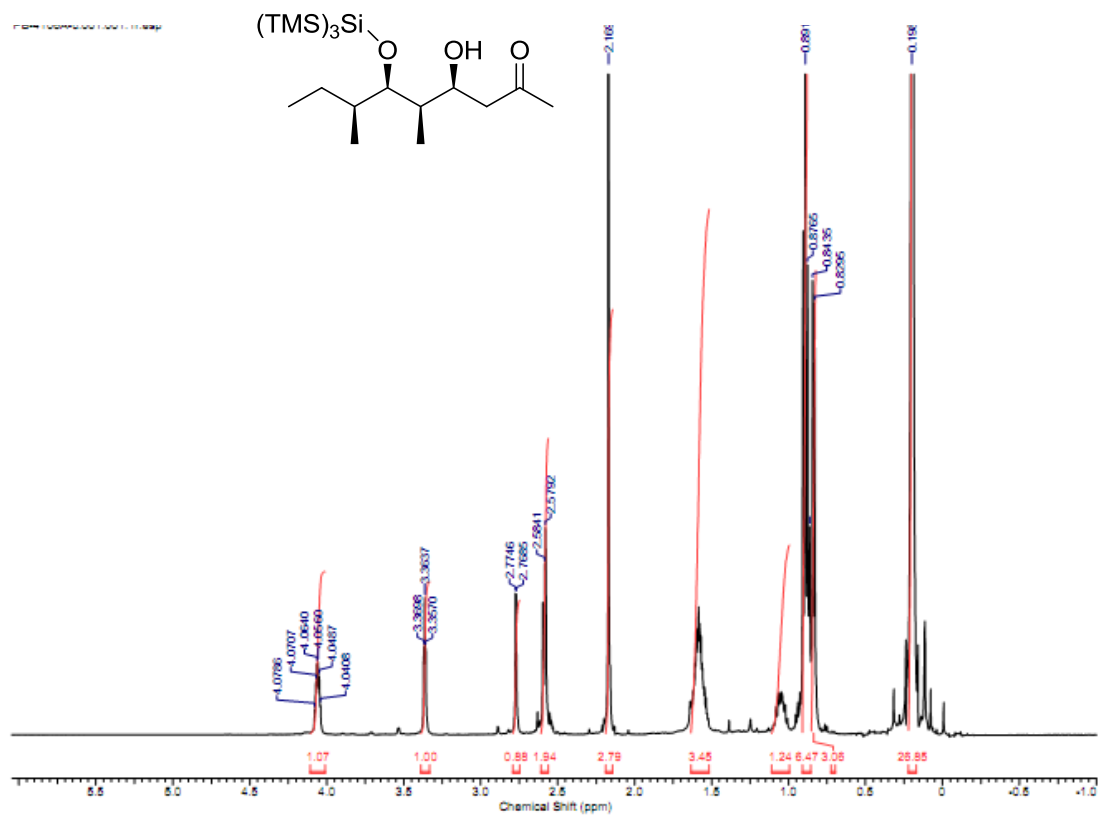

PB-4105A-c.002.001.1f.esp

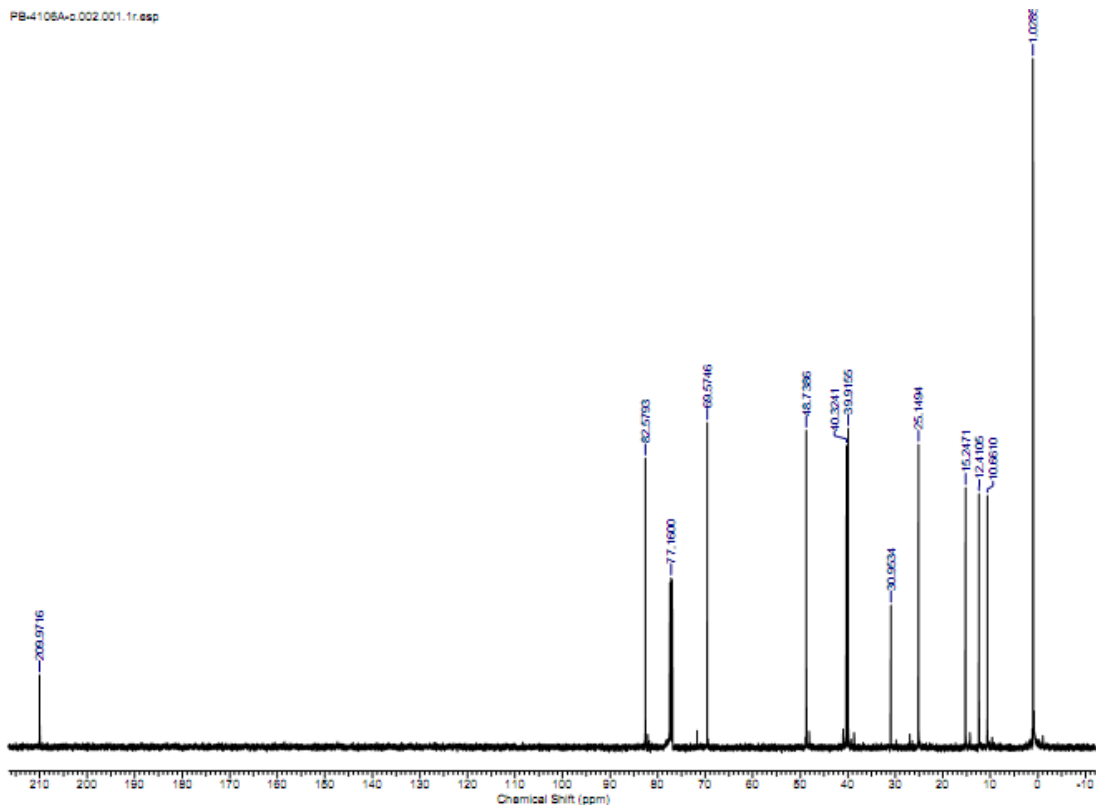



30a

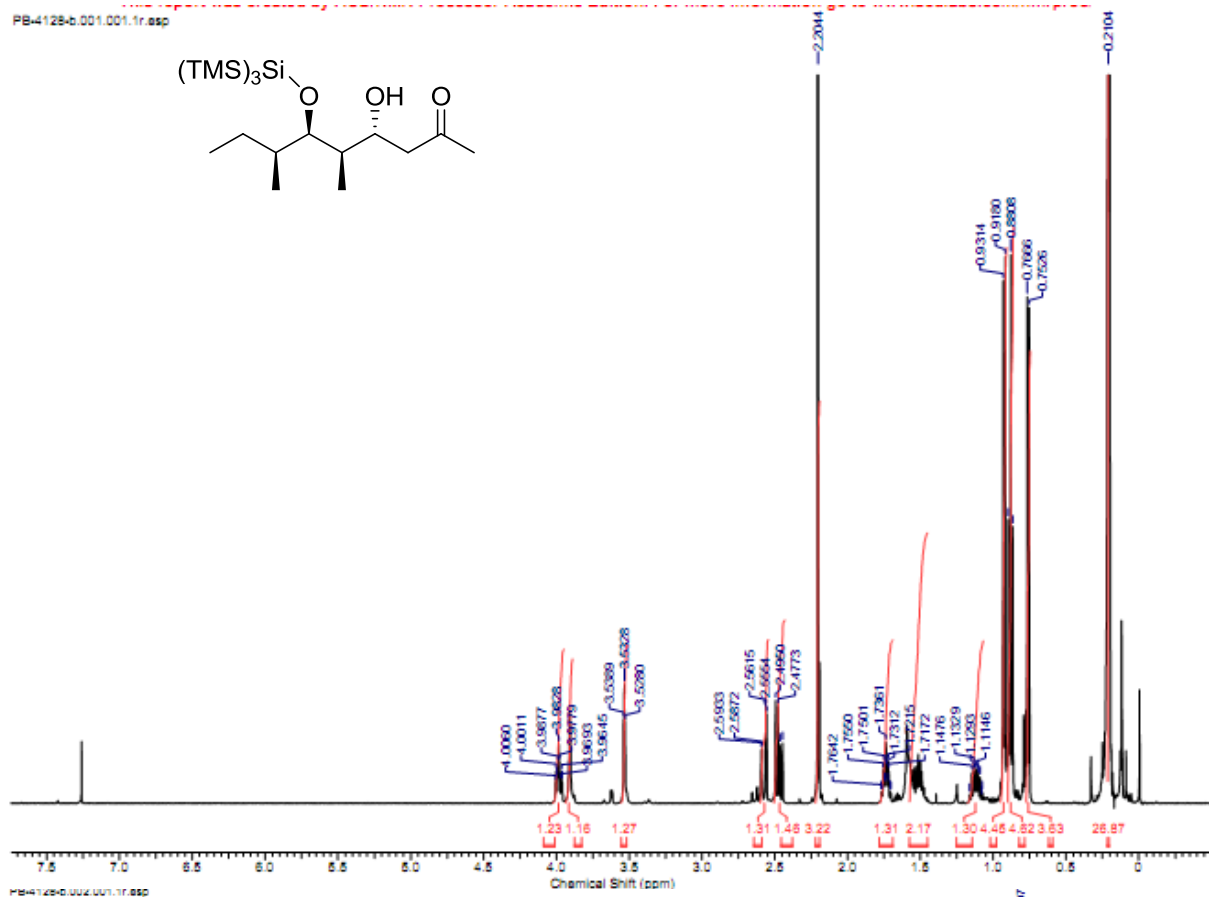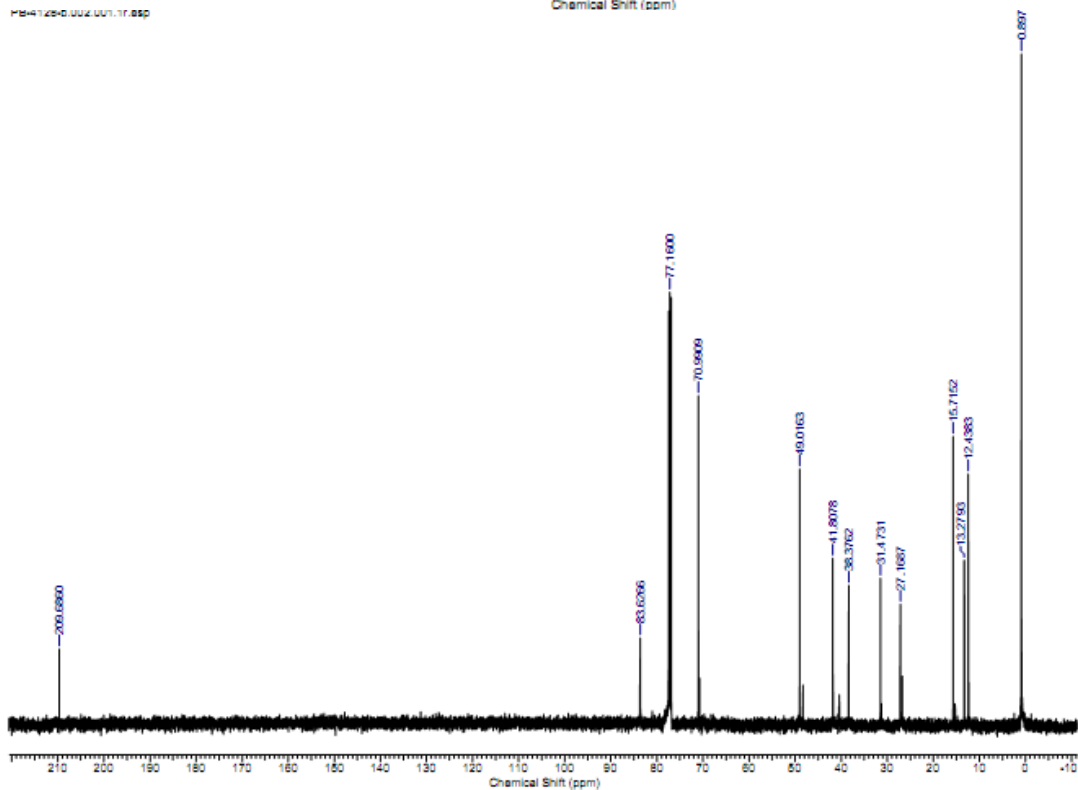

31

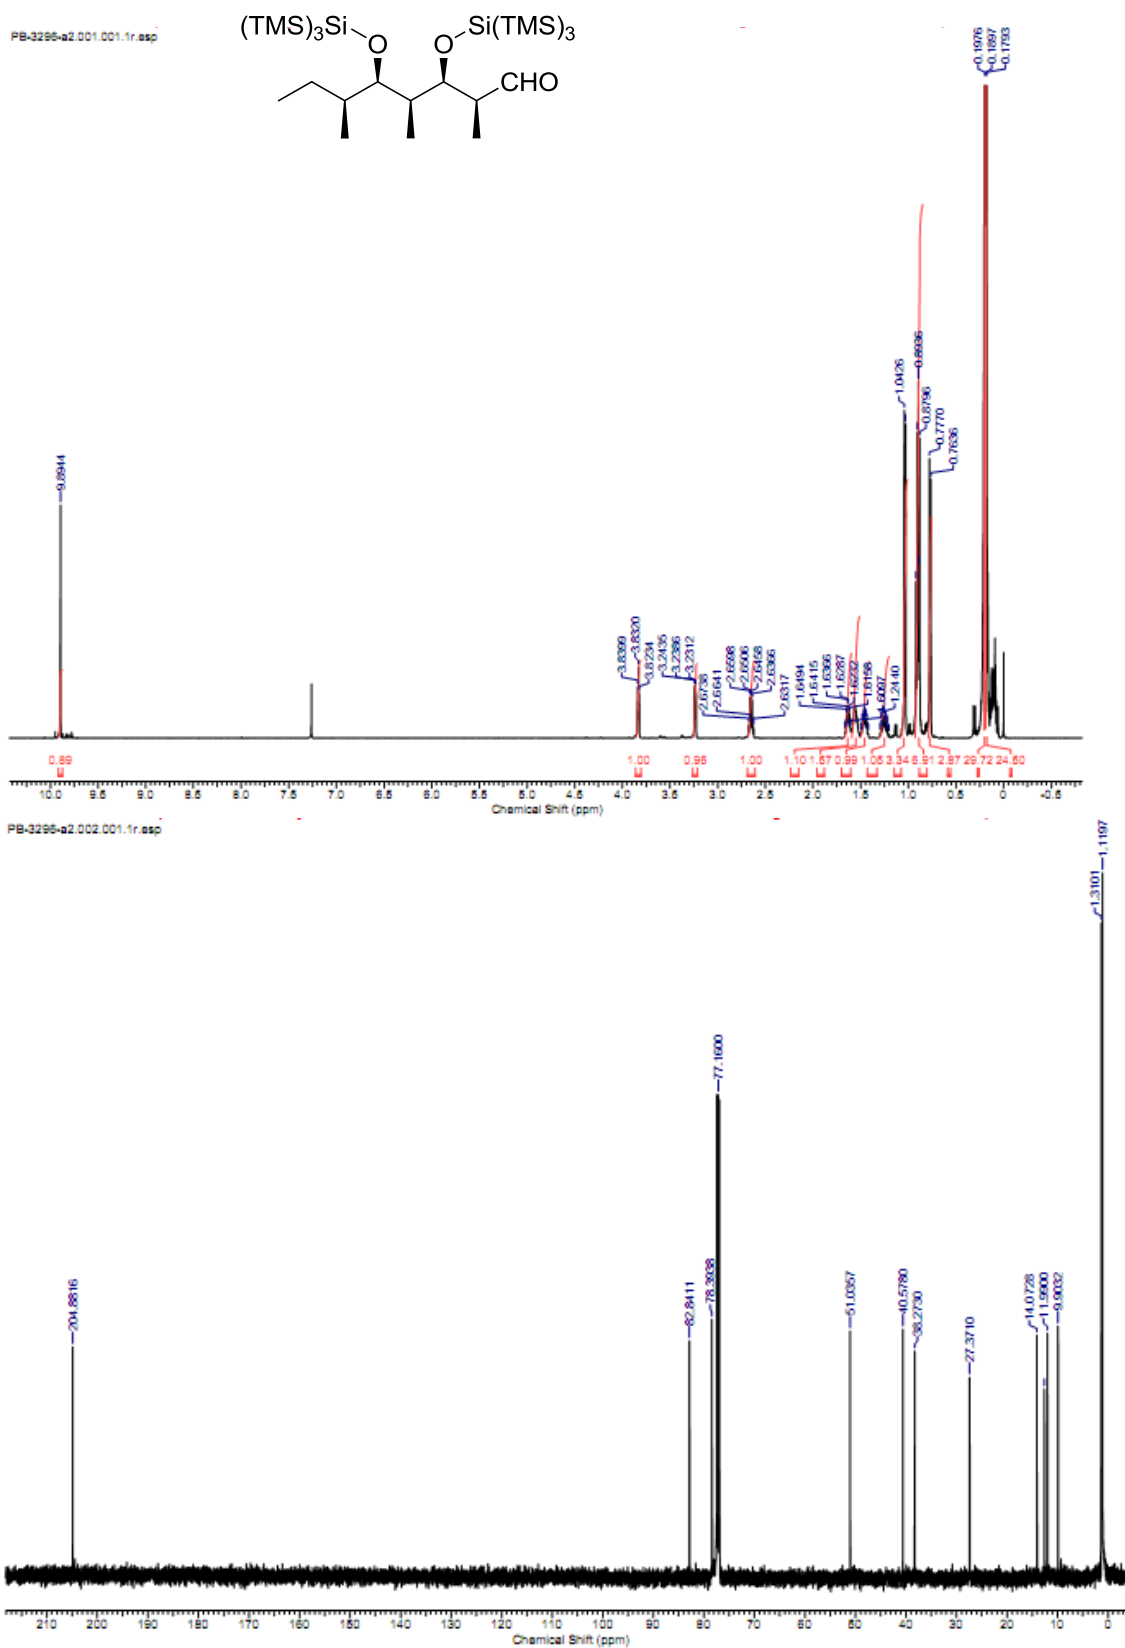

32

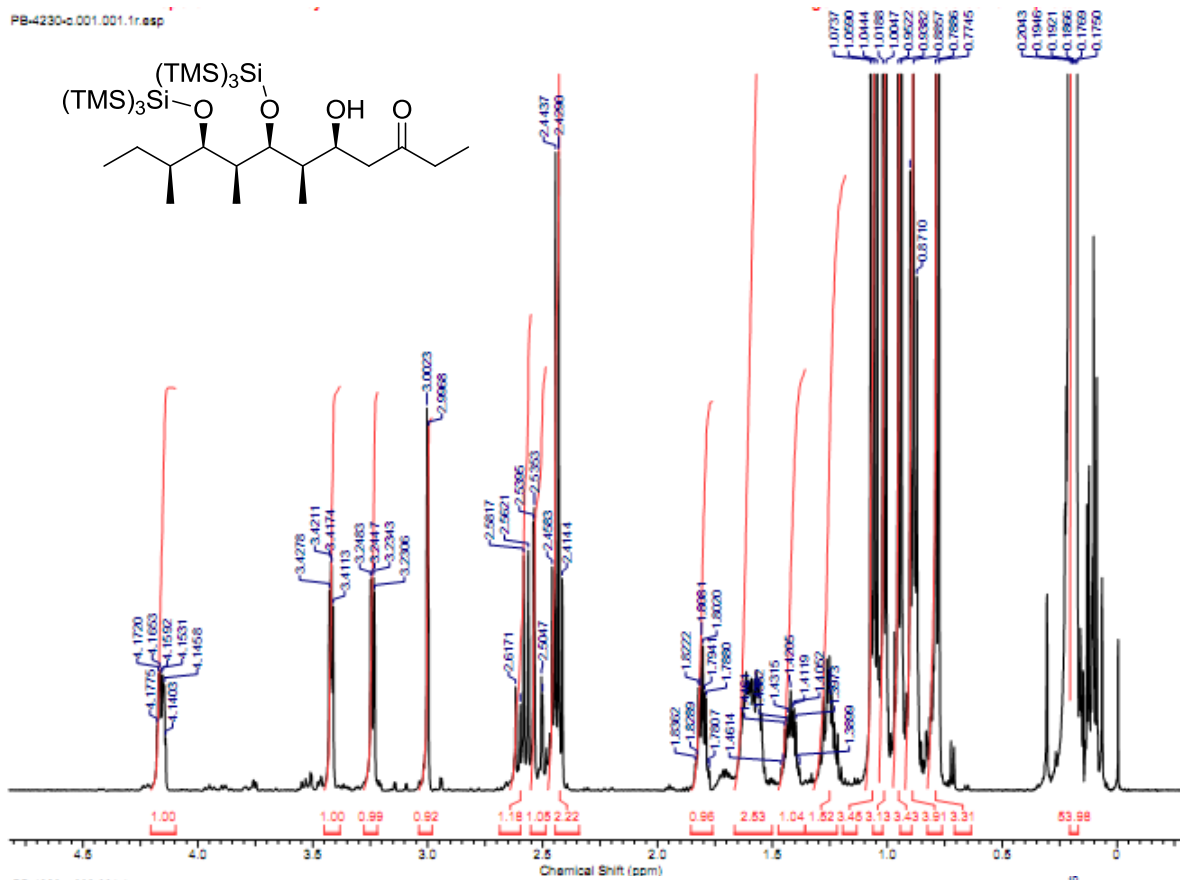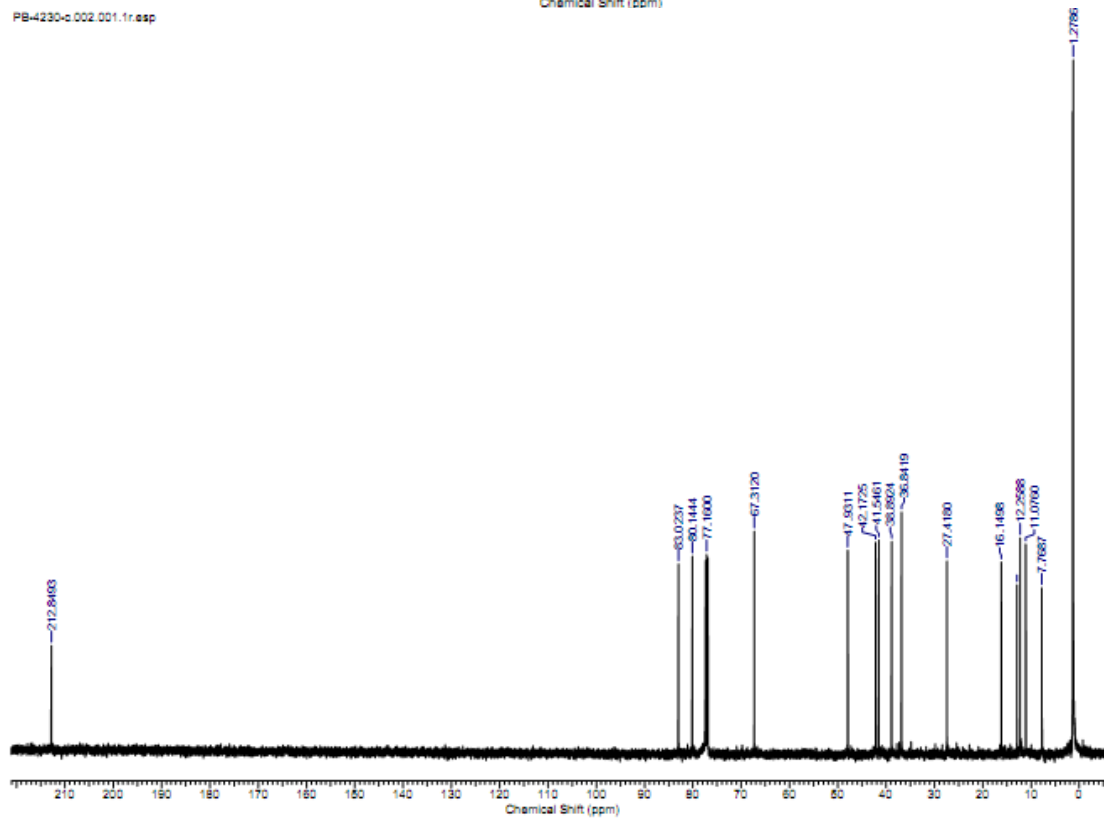

S155

33

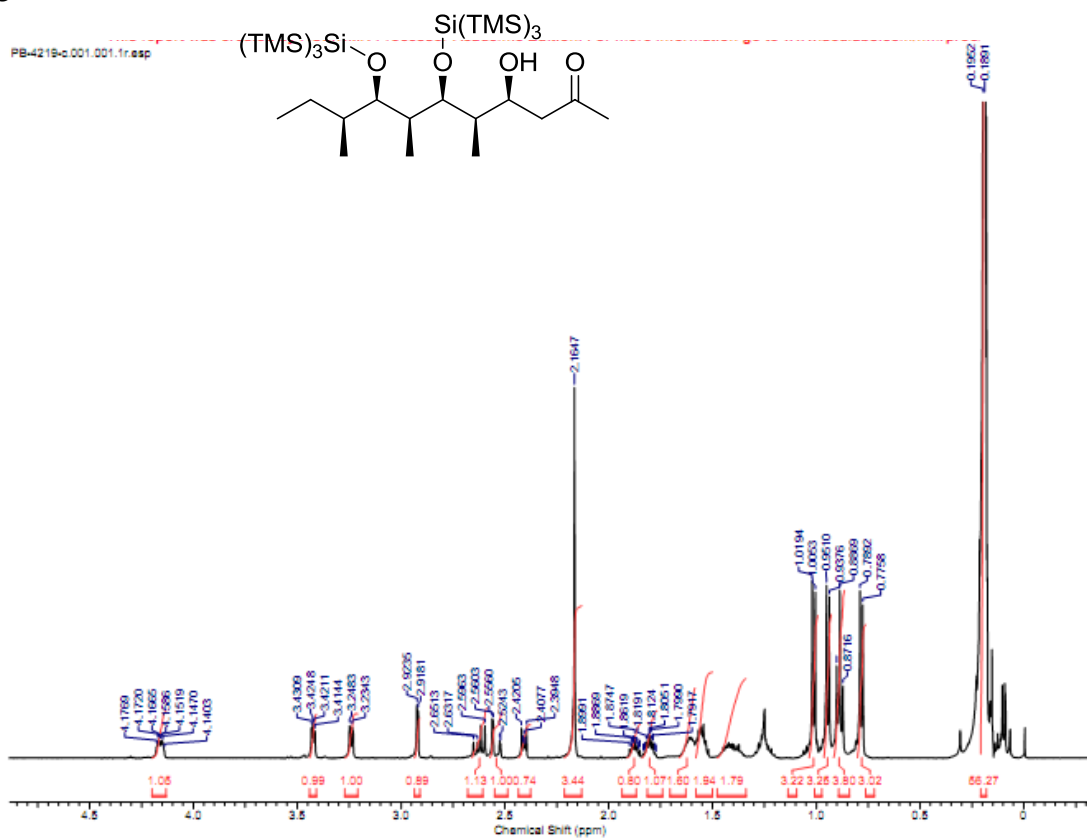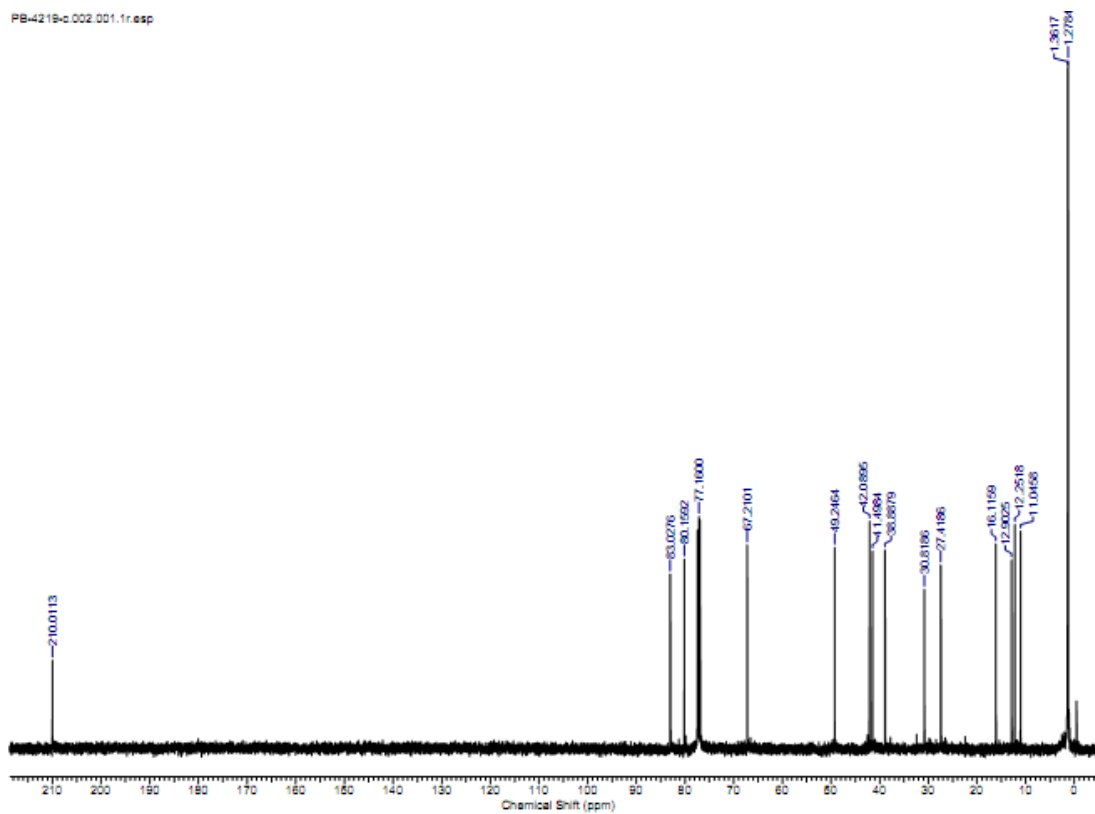

34

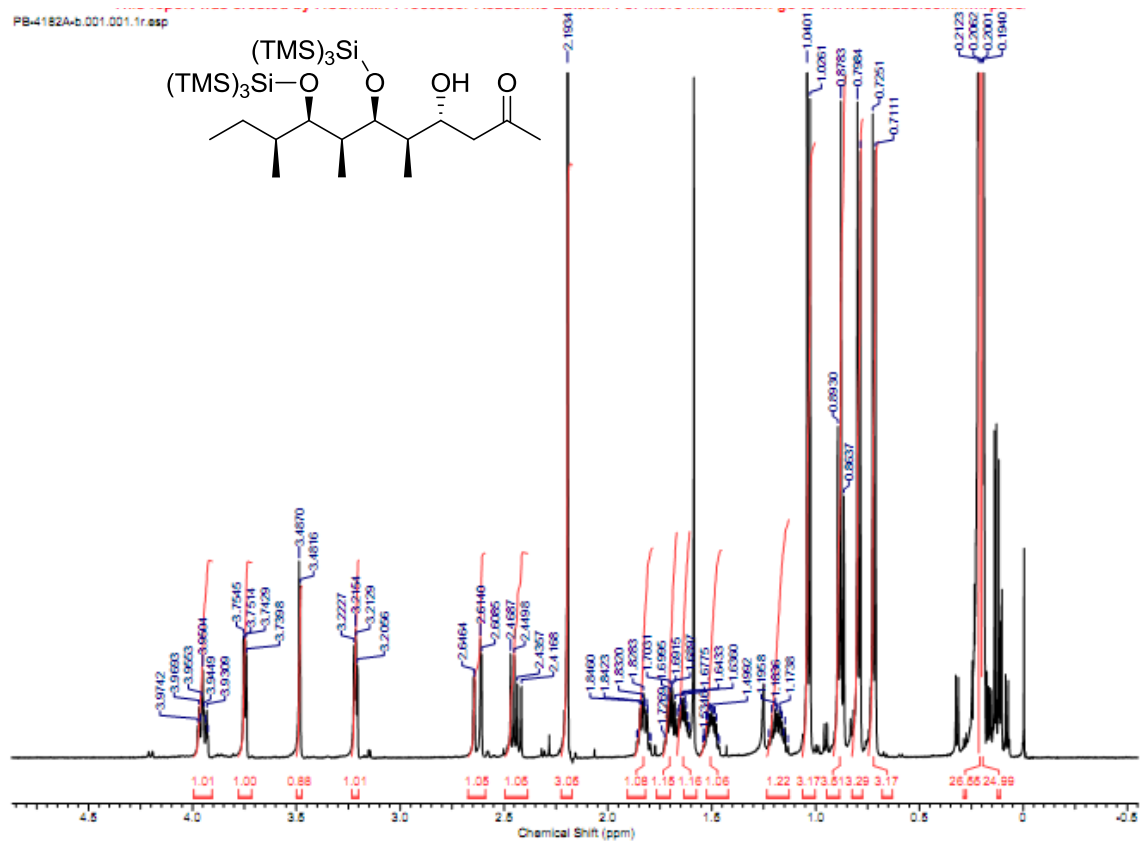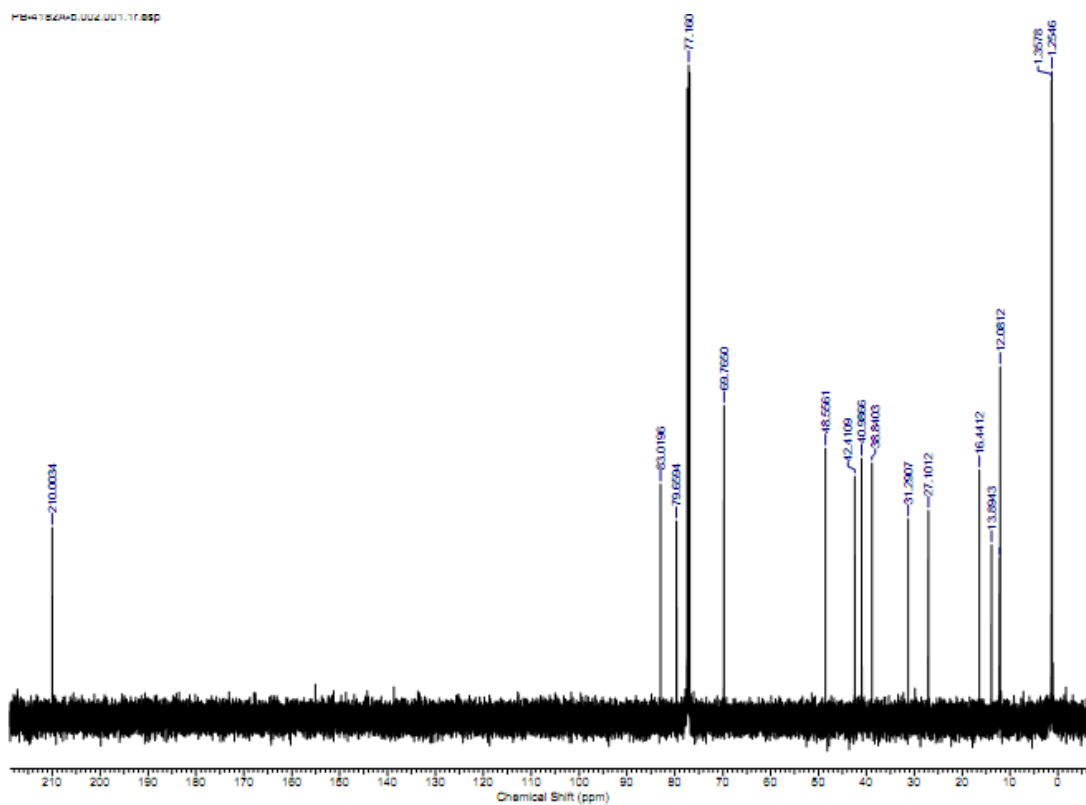

S157



SI-3

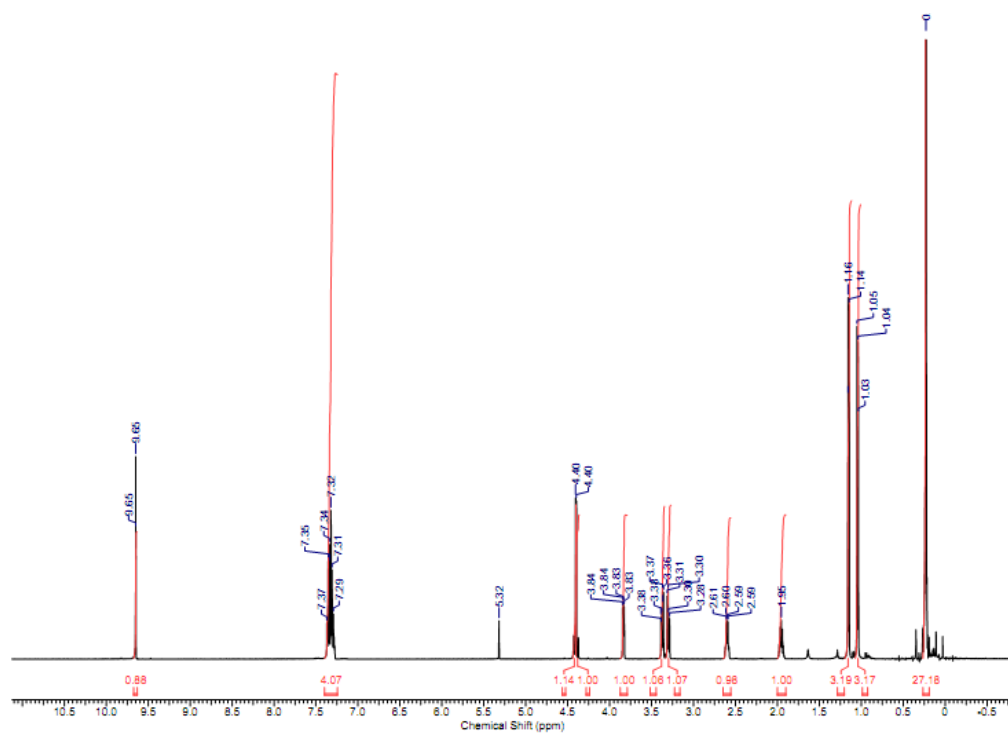

PB4117B-b.002.001.1r.esp

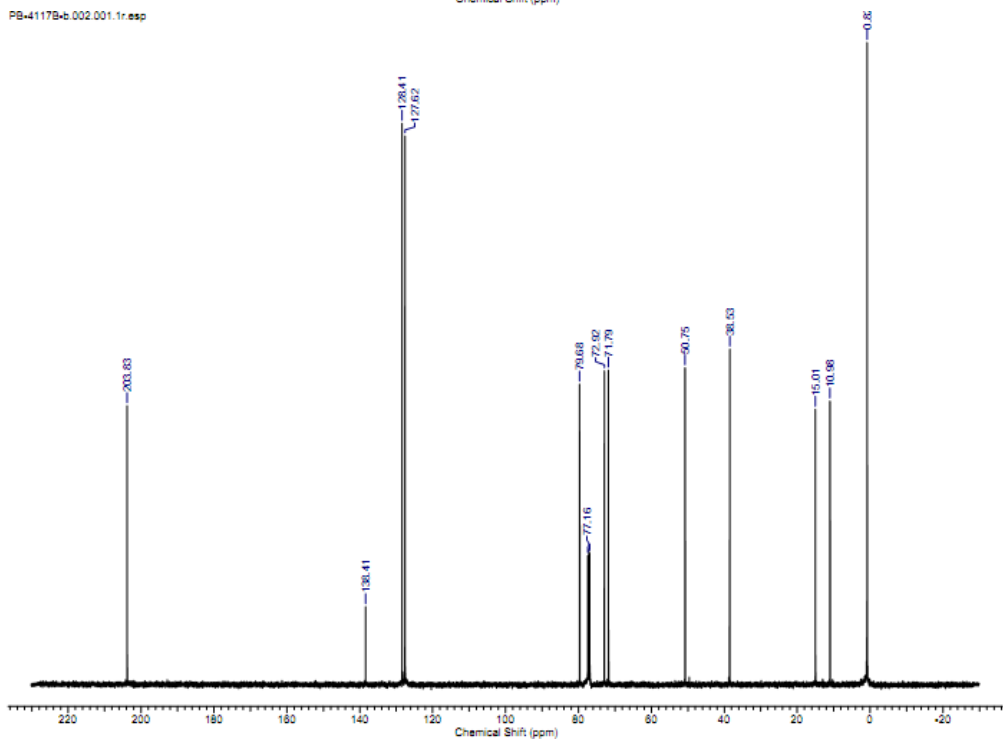

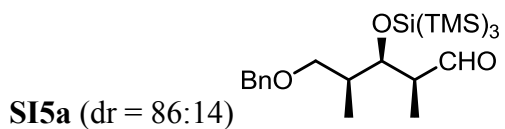

PB4117A-c.001.001.1r.esp

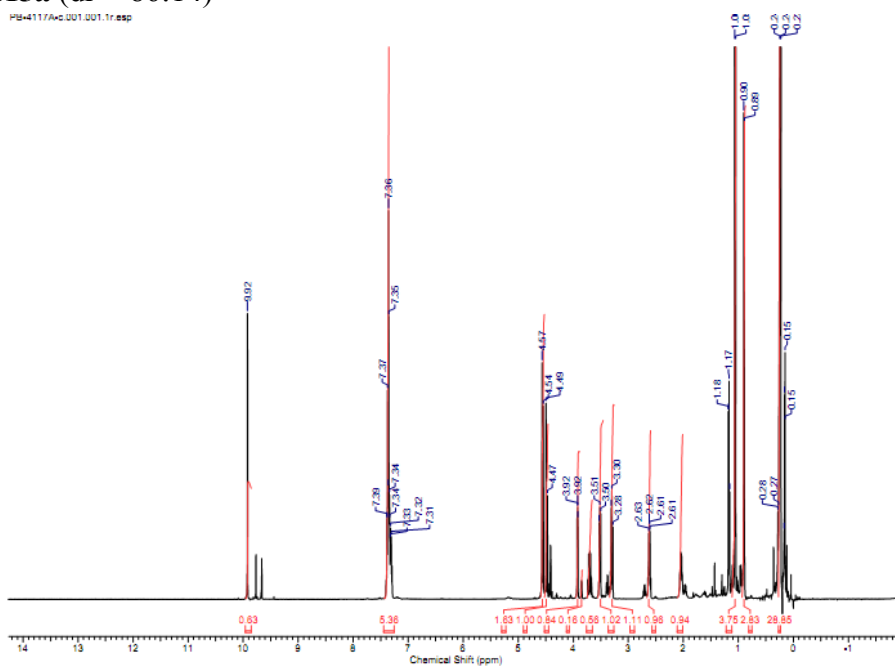

PB4117A-c.002.001.1r.esp

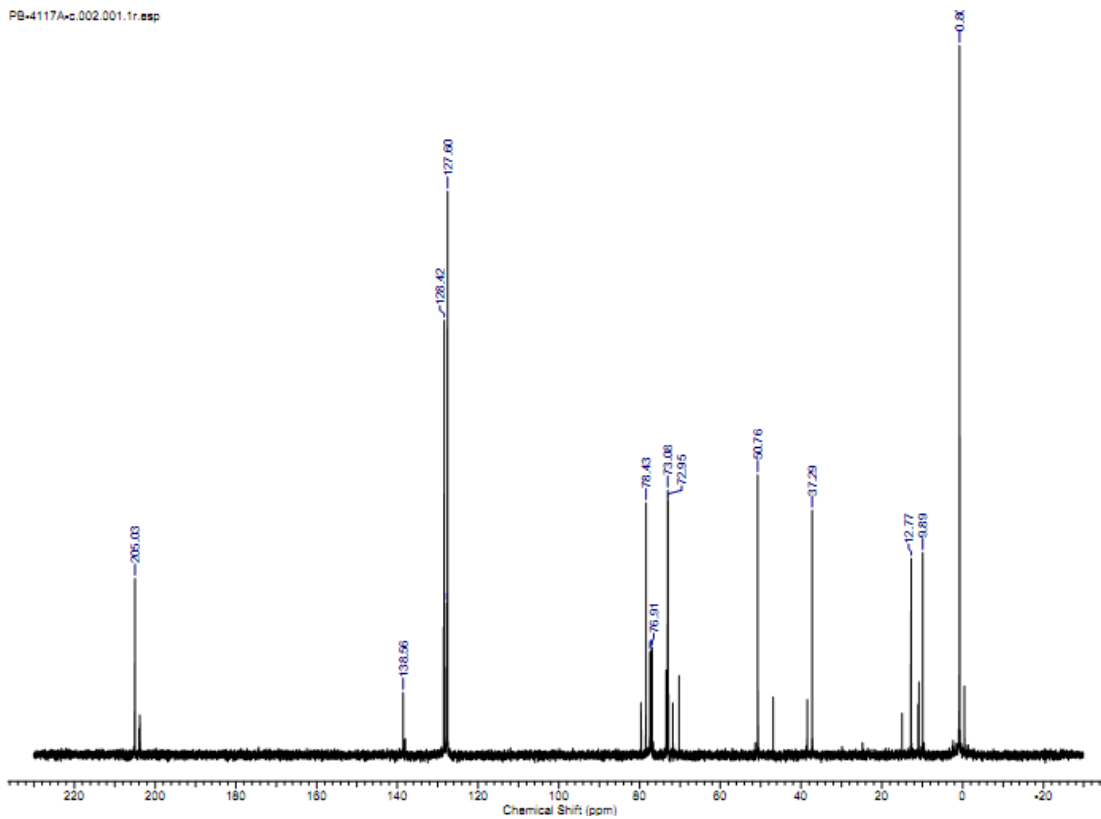





SI-11

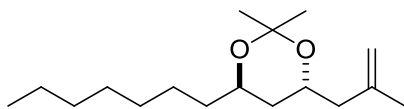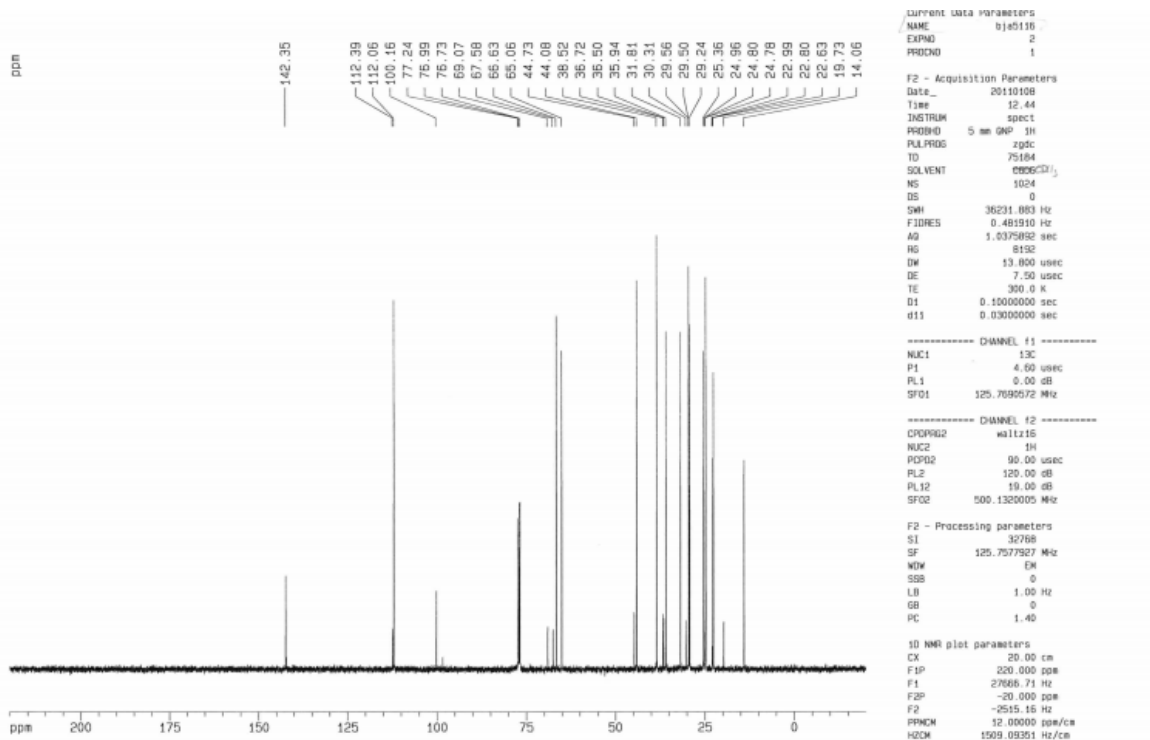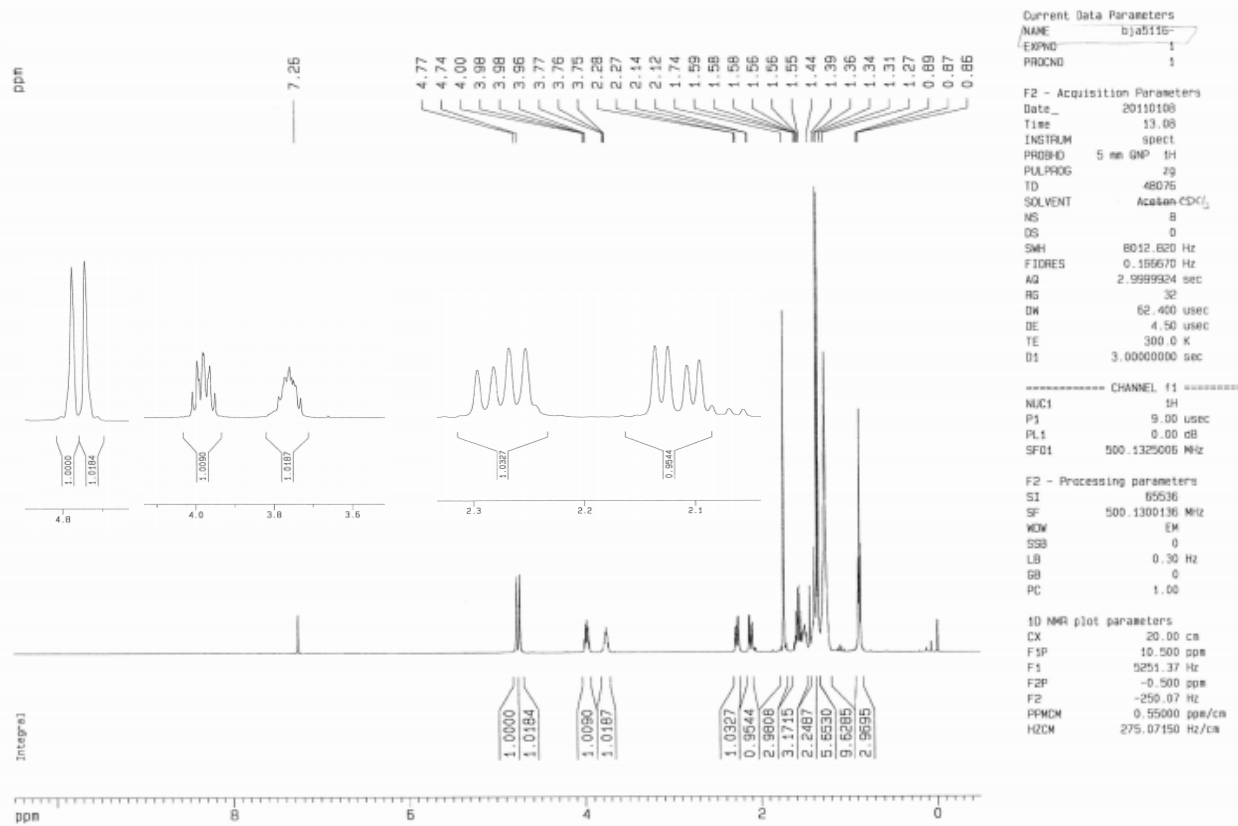

SI-12

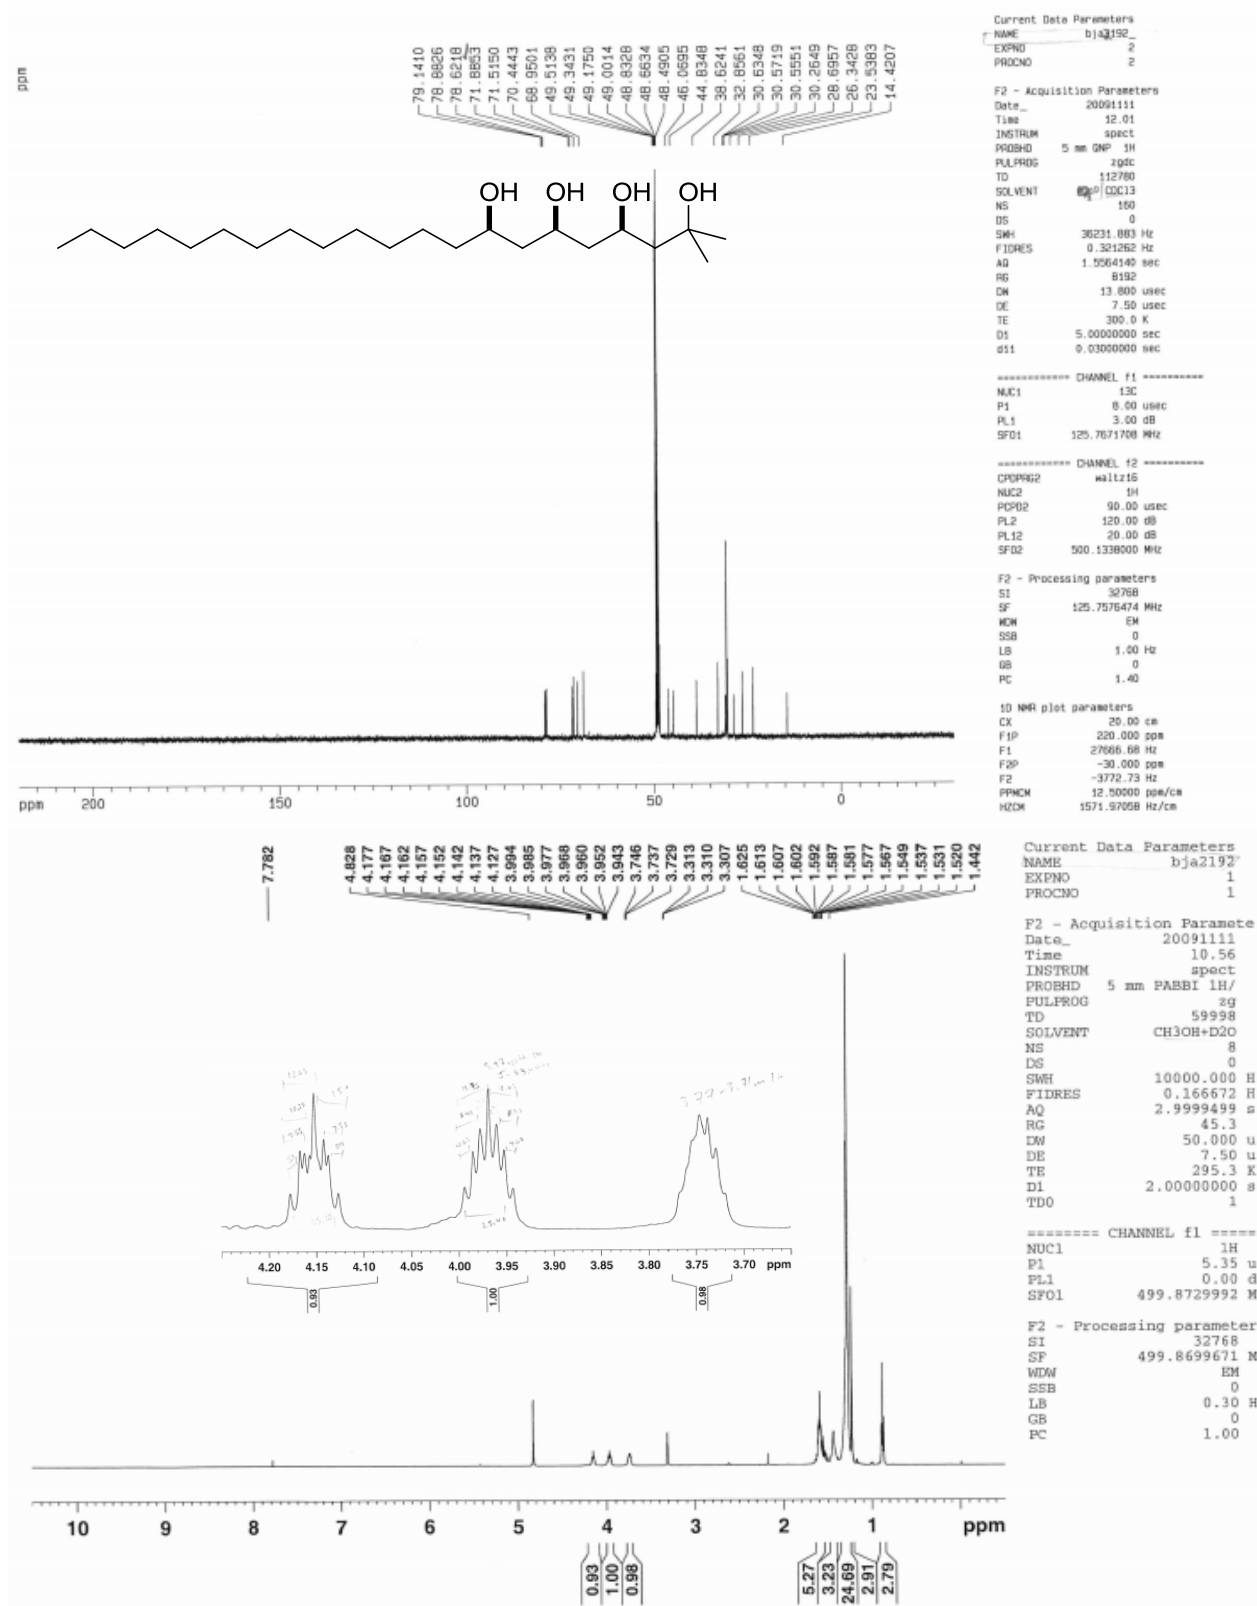

SI-13

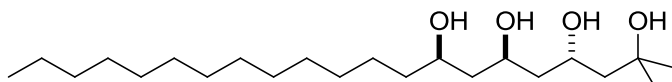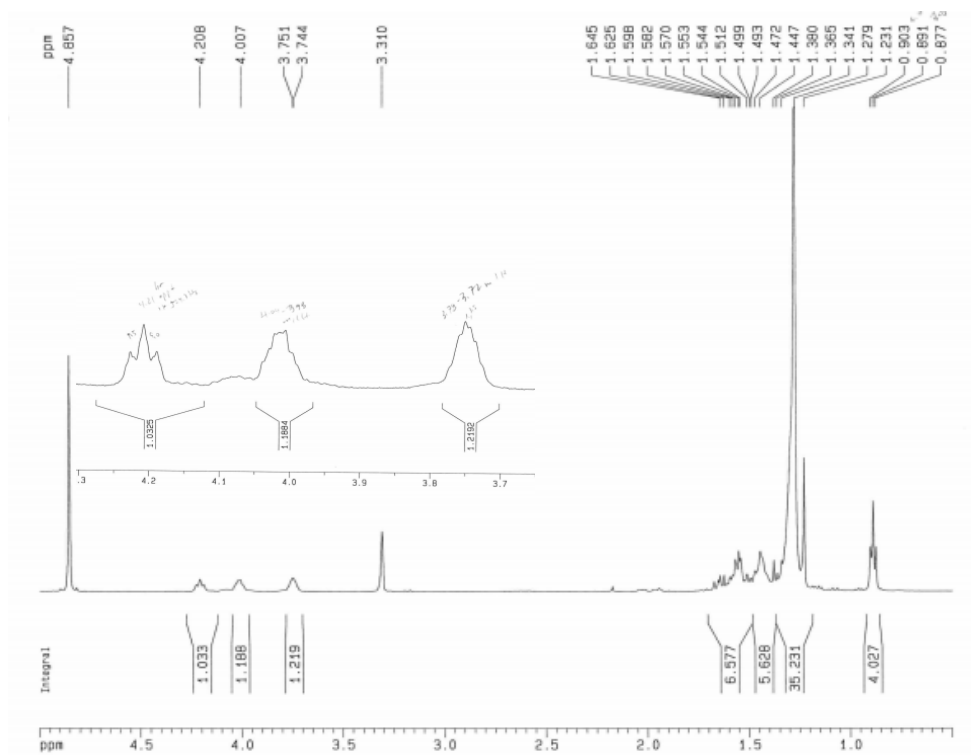

```

EXPNO 1
PROCNO 1
F2 - Acquisition Parameters
Date_ 20090414
Time 18.38
INSTRUM spect
PROBHD 5 mm QNP 1H
PULPROG zg
TD 48076
SOLVENT CDCl3
NS 8
DS 0
SWH 8012.820 Hz
FIDRES 0.166670 Hz
AQ 2.999924 sec
RG 128
DW 62.400 usec
DE 4.50 usec
TE 300.0 K
D1 3.0000000 sec
    
```

```

----- CHANNEL f1 -----
NUC1 1H
P1 9.50 usec
PL1 0.00 dB
SFO1 500.1325005 MHz
F2 - Processing parameters
SI 65536
SF 500.1300119 MHz
WDW EM
SSB 0
LB 0.30 Hz
GB 0
PC 1.00
    
```

```

1D NMR plot parameters
CX 20.00 cm
F1P 5.000 ppm
F1 2500.65 Hz
F2P 0.500 ppm
F2 250.06 Hz
PPMCM 0.22500 ppm/cm
HZCM 112.52925 Hz/cm
    
```

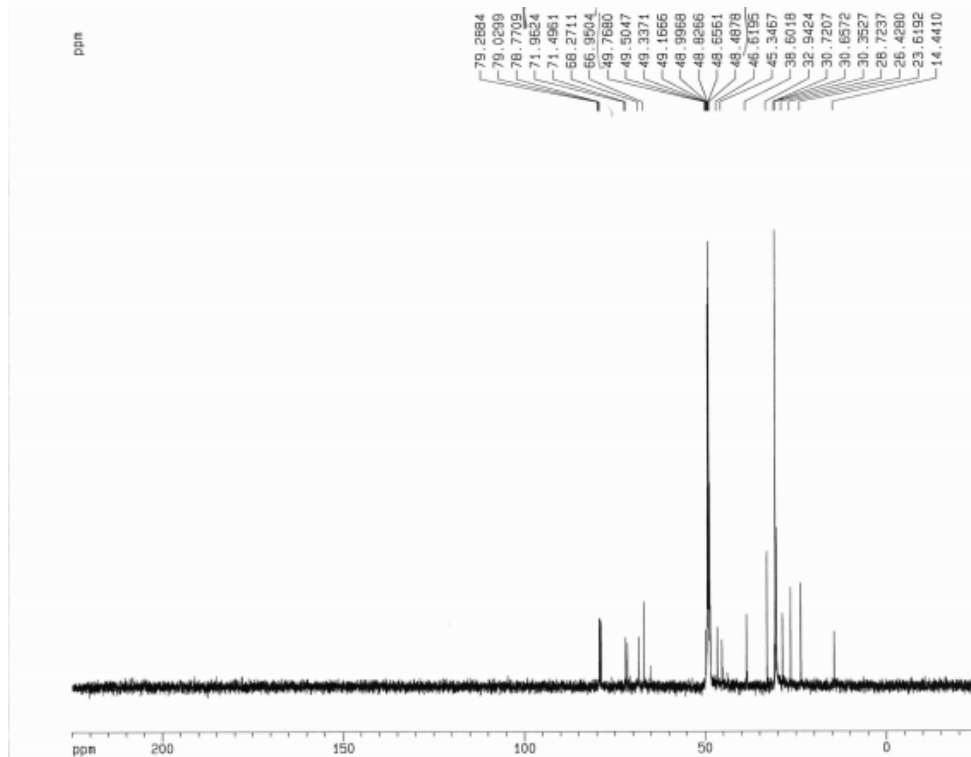

```

EXPNO 2
PROCNO 2
F2 - Acquisition Parameters
Date_ 20090414
Time 18.42
INSTRUM spect
PROBHD 5 mm QNP 1H
PULPROG zgdc
TD 112789
SOLVENT CDCl3
NS 256
DS 0
SWH 37793.984 Hz
FIDRES 0.333339 Hz
AQ 1.5000240 sec
RG 4096
DW 13.300 usec
DE 7.50 usec
TE 300.0 K
D1 5.0000000 sec
d11 0.0300000 sec
    
```

```

----- CHANNEL f1 -----
NUC1 13C
P1 8.00 usec
PL1 3.00 dB
SFO1 125.7671768 MHz
----- CHANNEL f2 -----
CPDPRG2 waltz16
NUC2 1H
PCPD2 90.00 usec
PL2 120.00 dB
PL12 19.00 dB
SFO2 500.1339000 MHz
    
```

```

F2 - Processing parameters
SI 32768
SF 125.7576357 MHz
WDW EM
SSB 0
LB 1.00 Hz
GB 0
PC 1.40
    
```

```

1D NMR plot parameters
CX 25.00 cm
F1P 225.000 ppm
F1 28295.47 Hz
F2P -25.000 ppm
F2 -3143.94 Hz
PPMCM 12.50000 ppm/cm
HZCM 1571.97046 Hz/cm
    
```



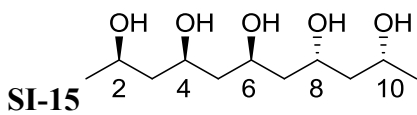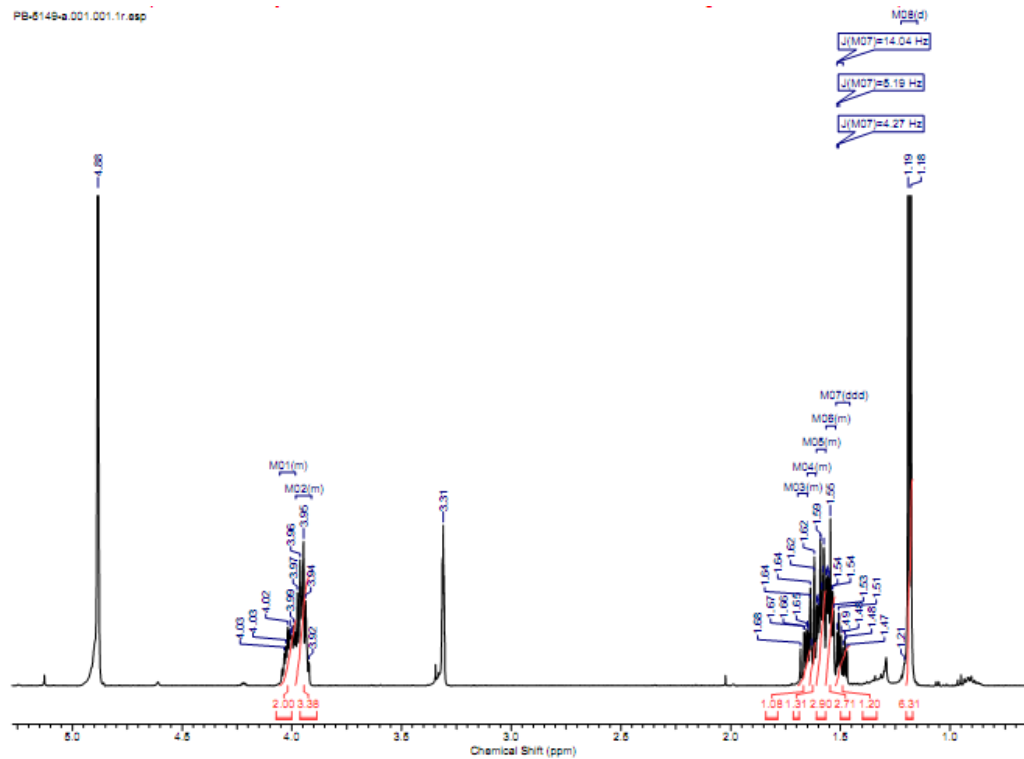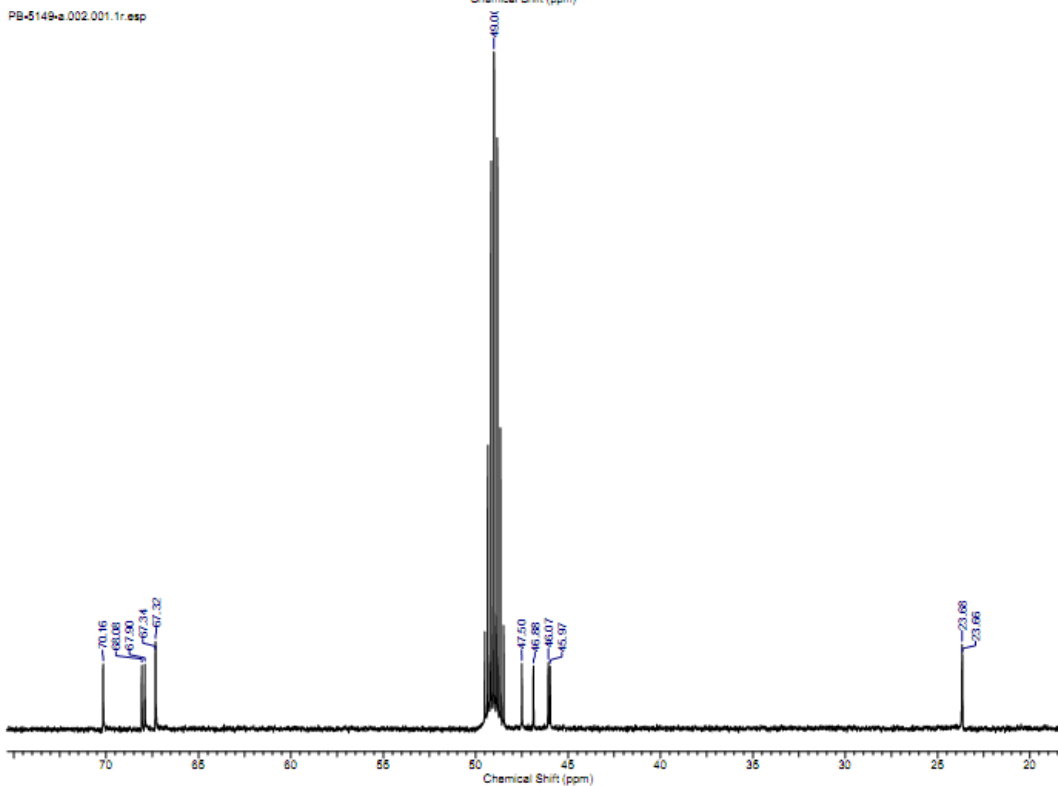

SI-16

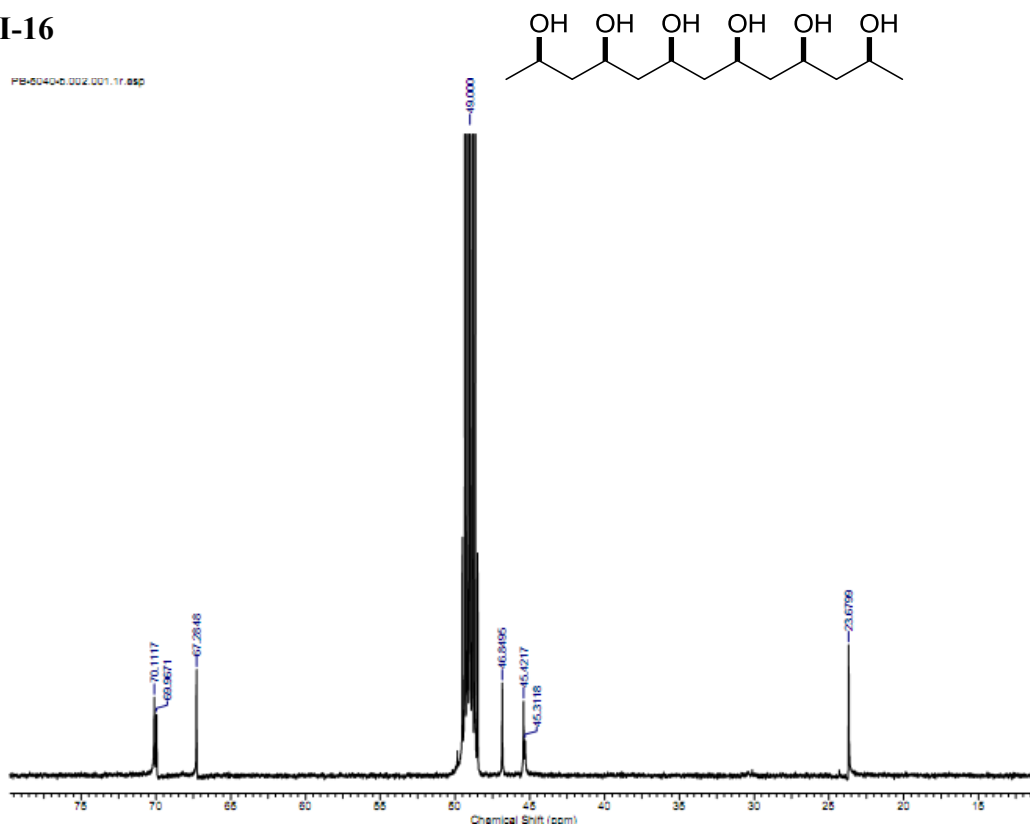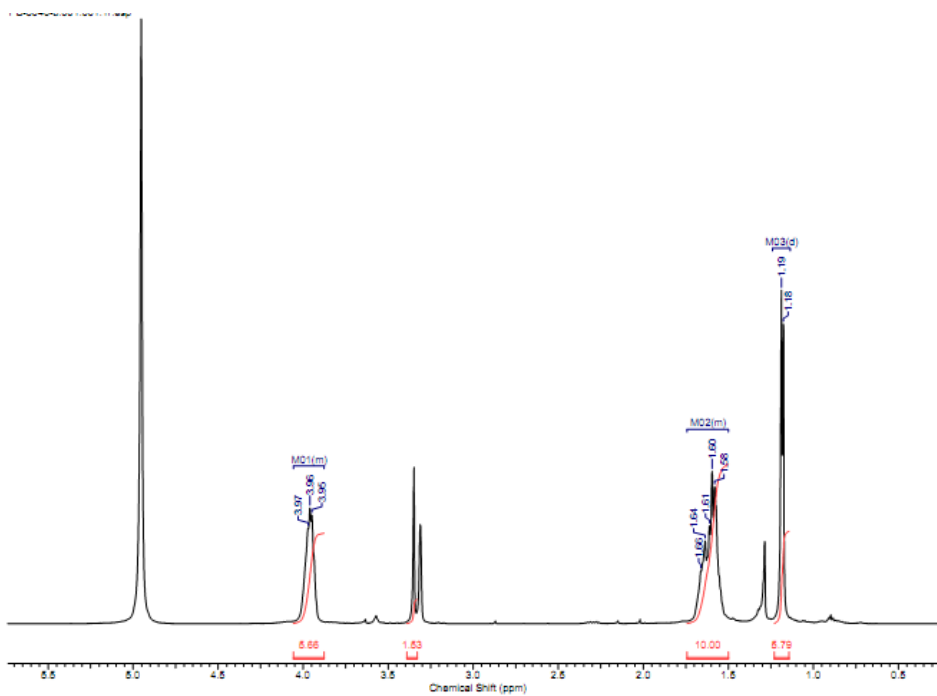

SI-17

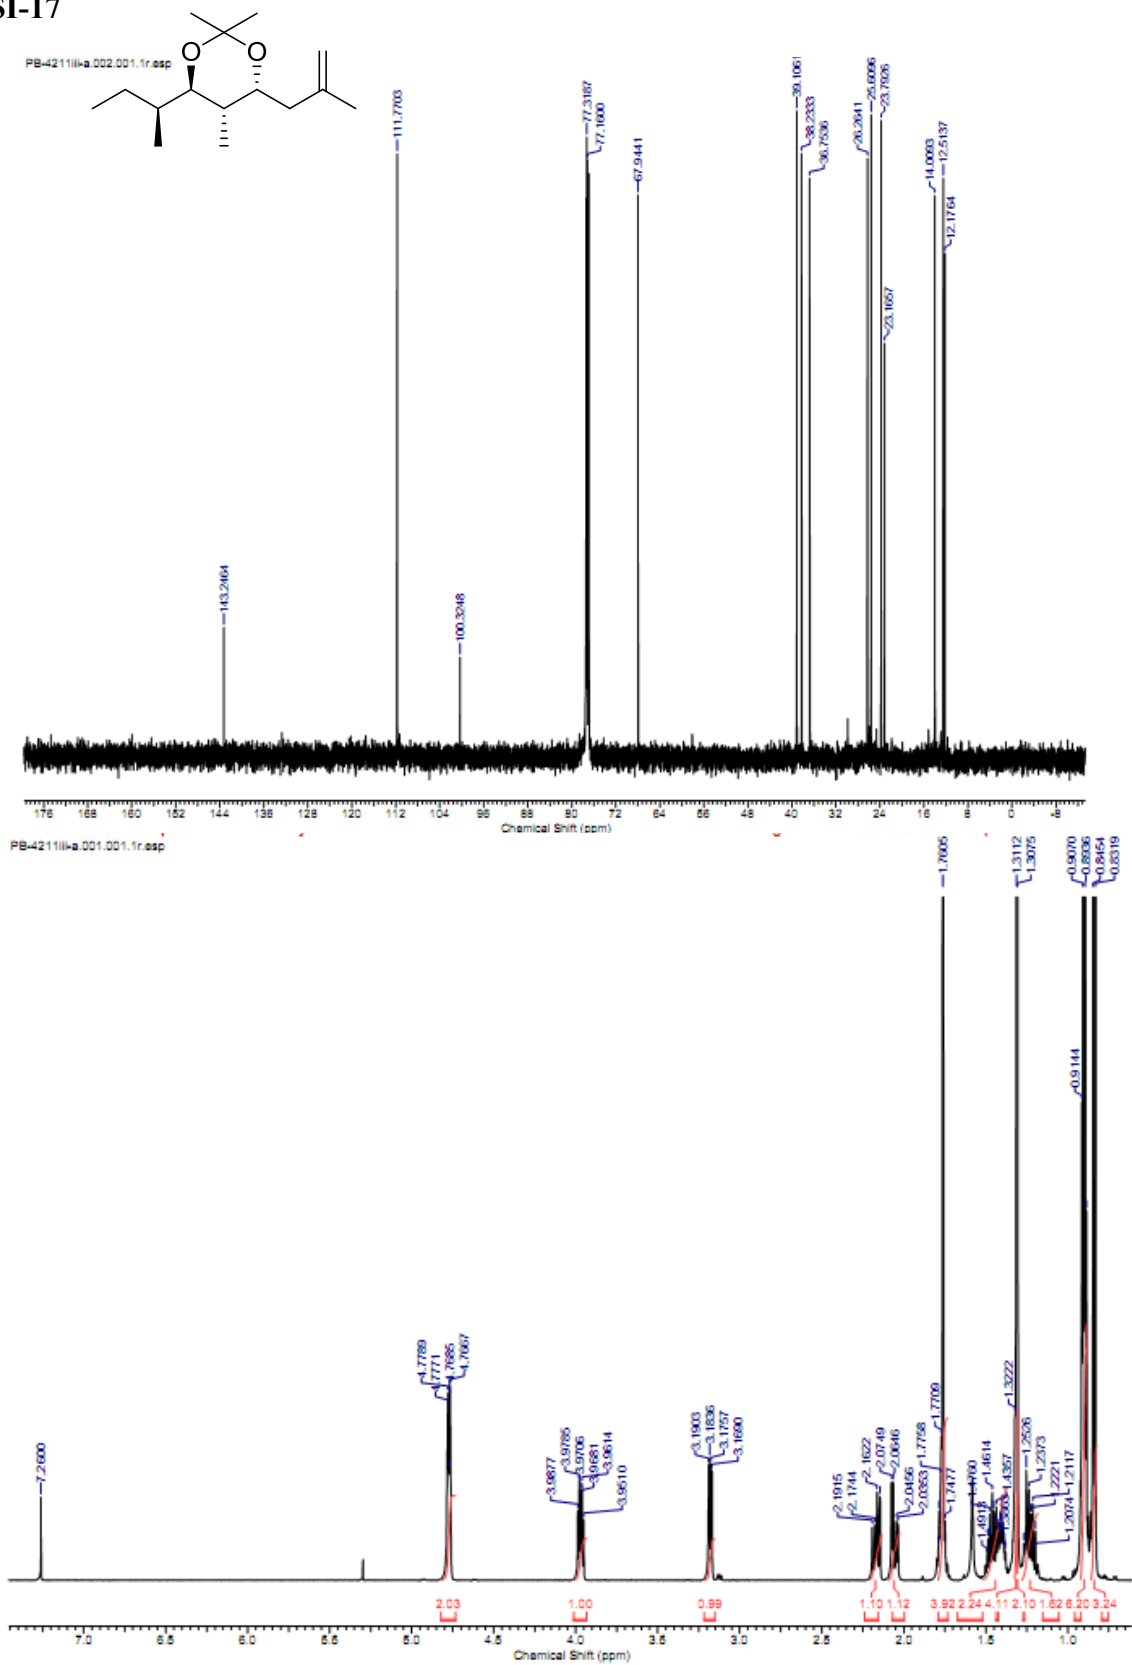



SI-18

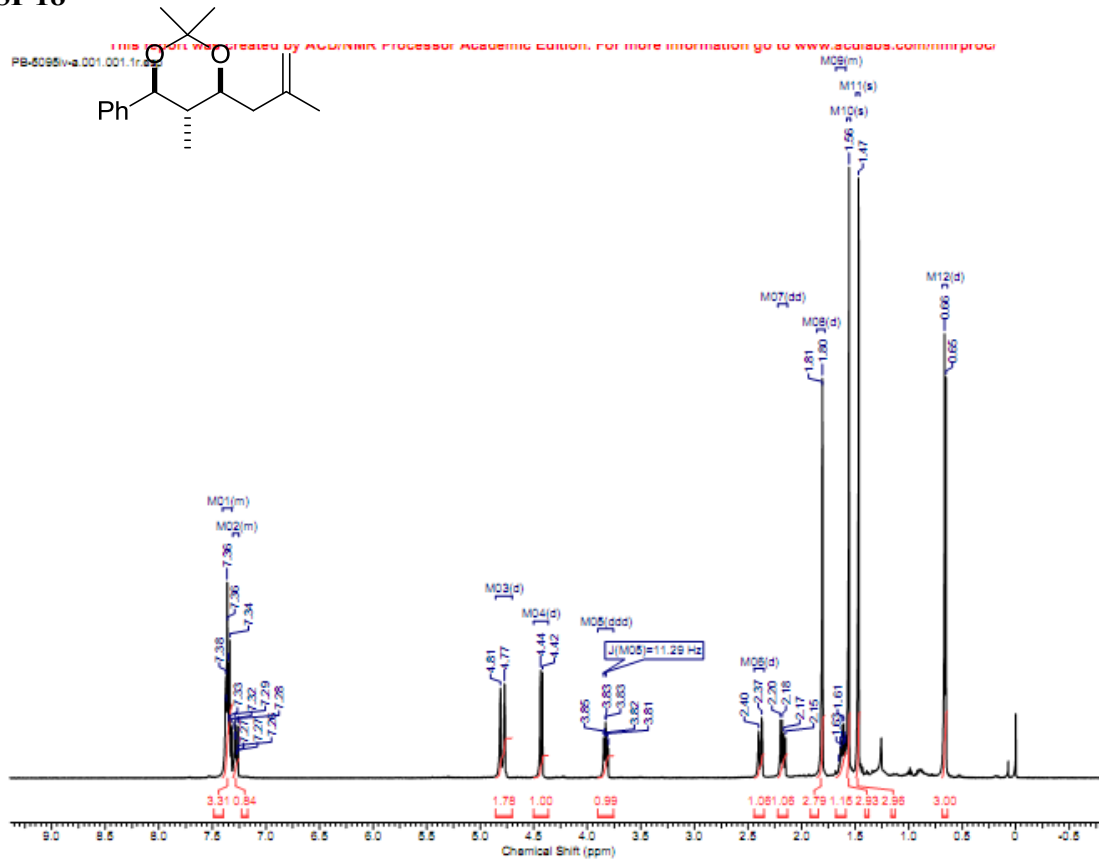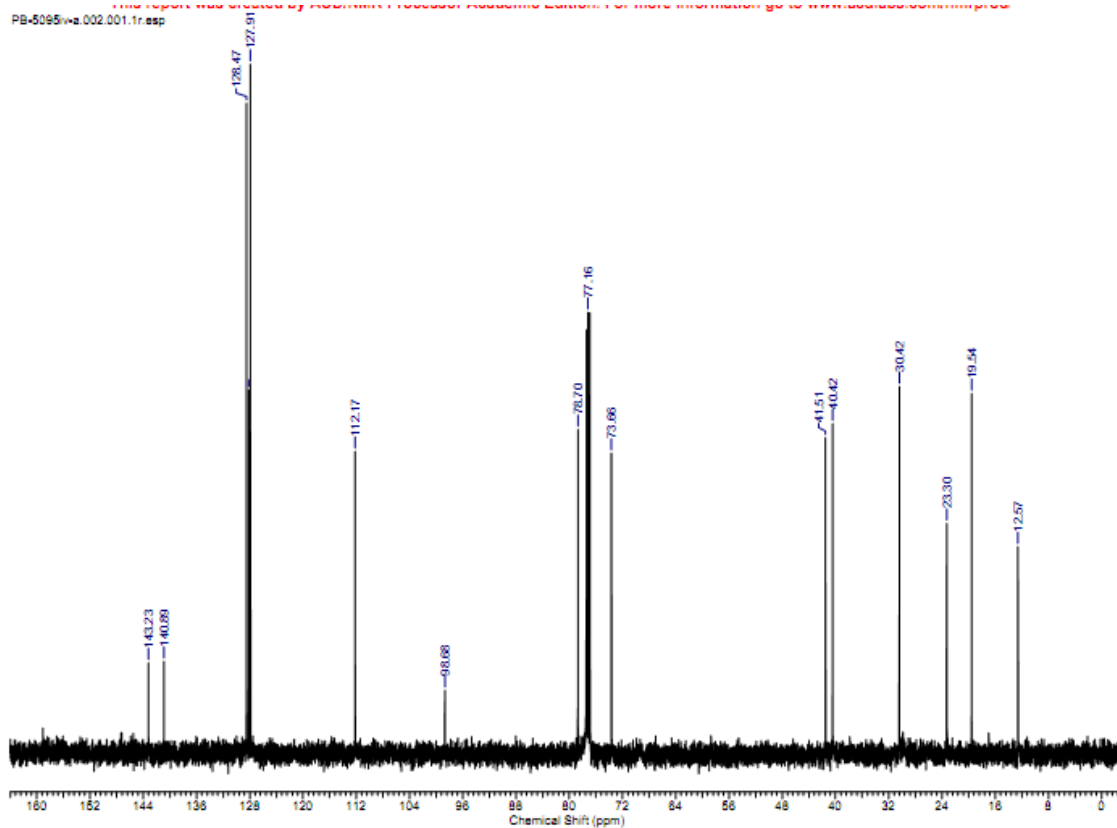

# SI-19

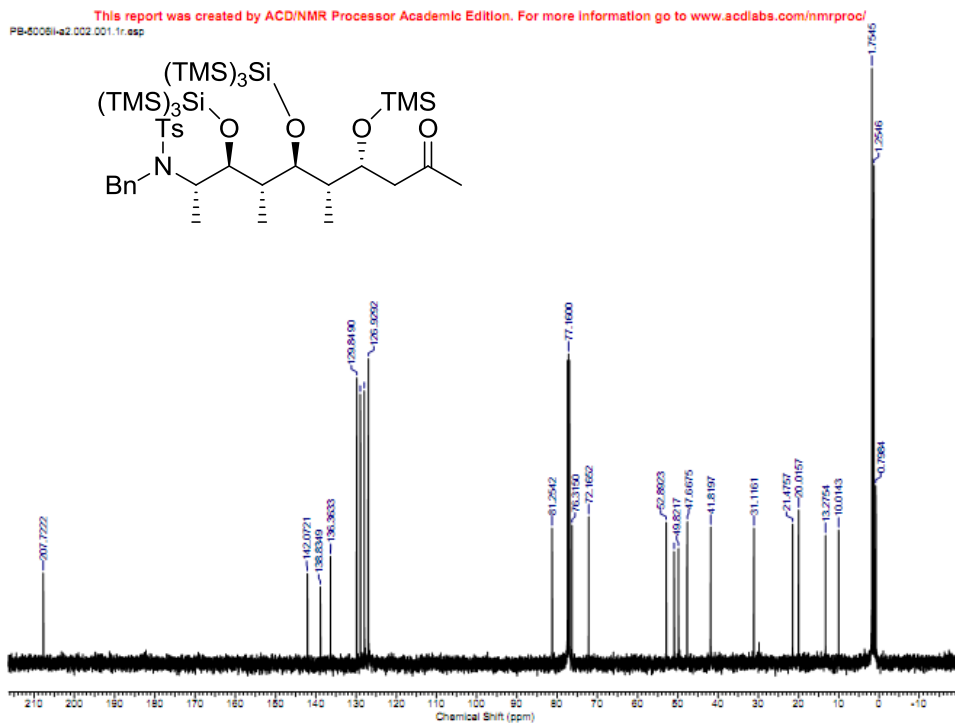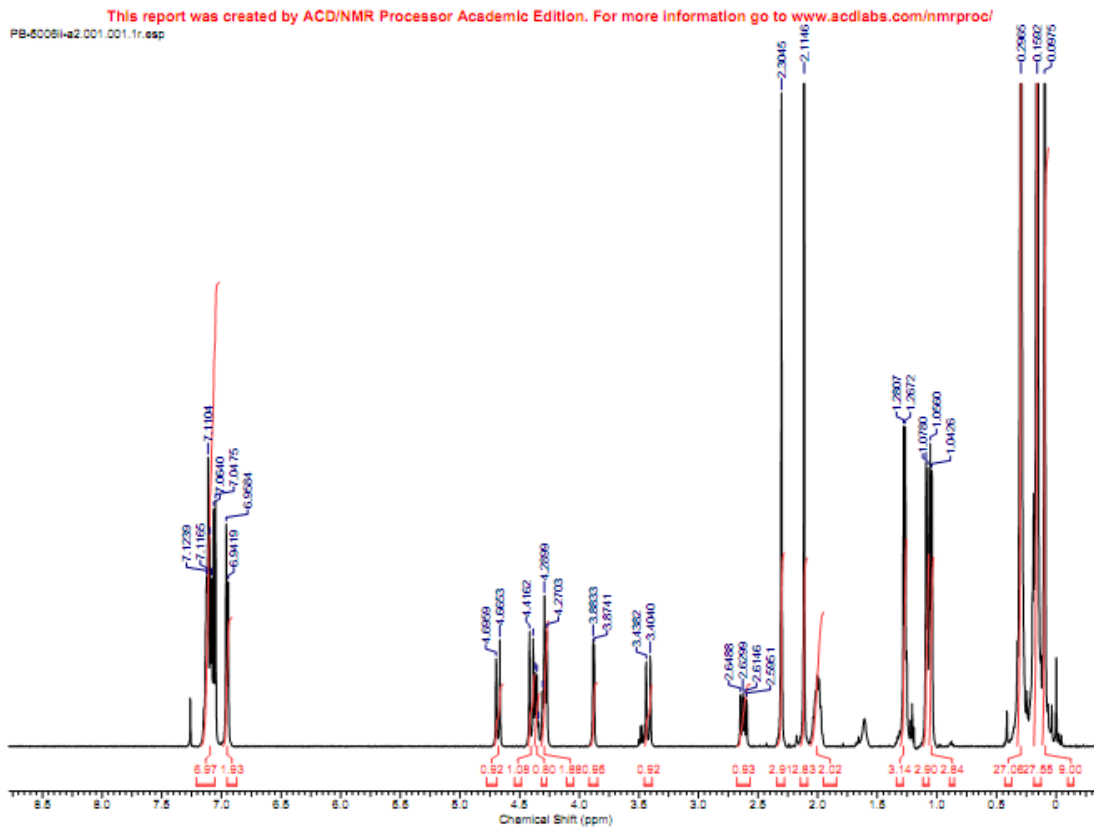



### SI-21

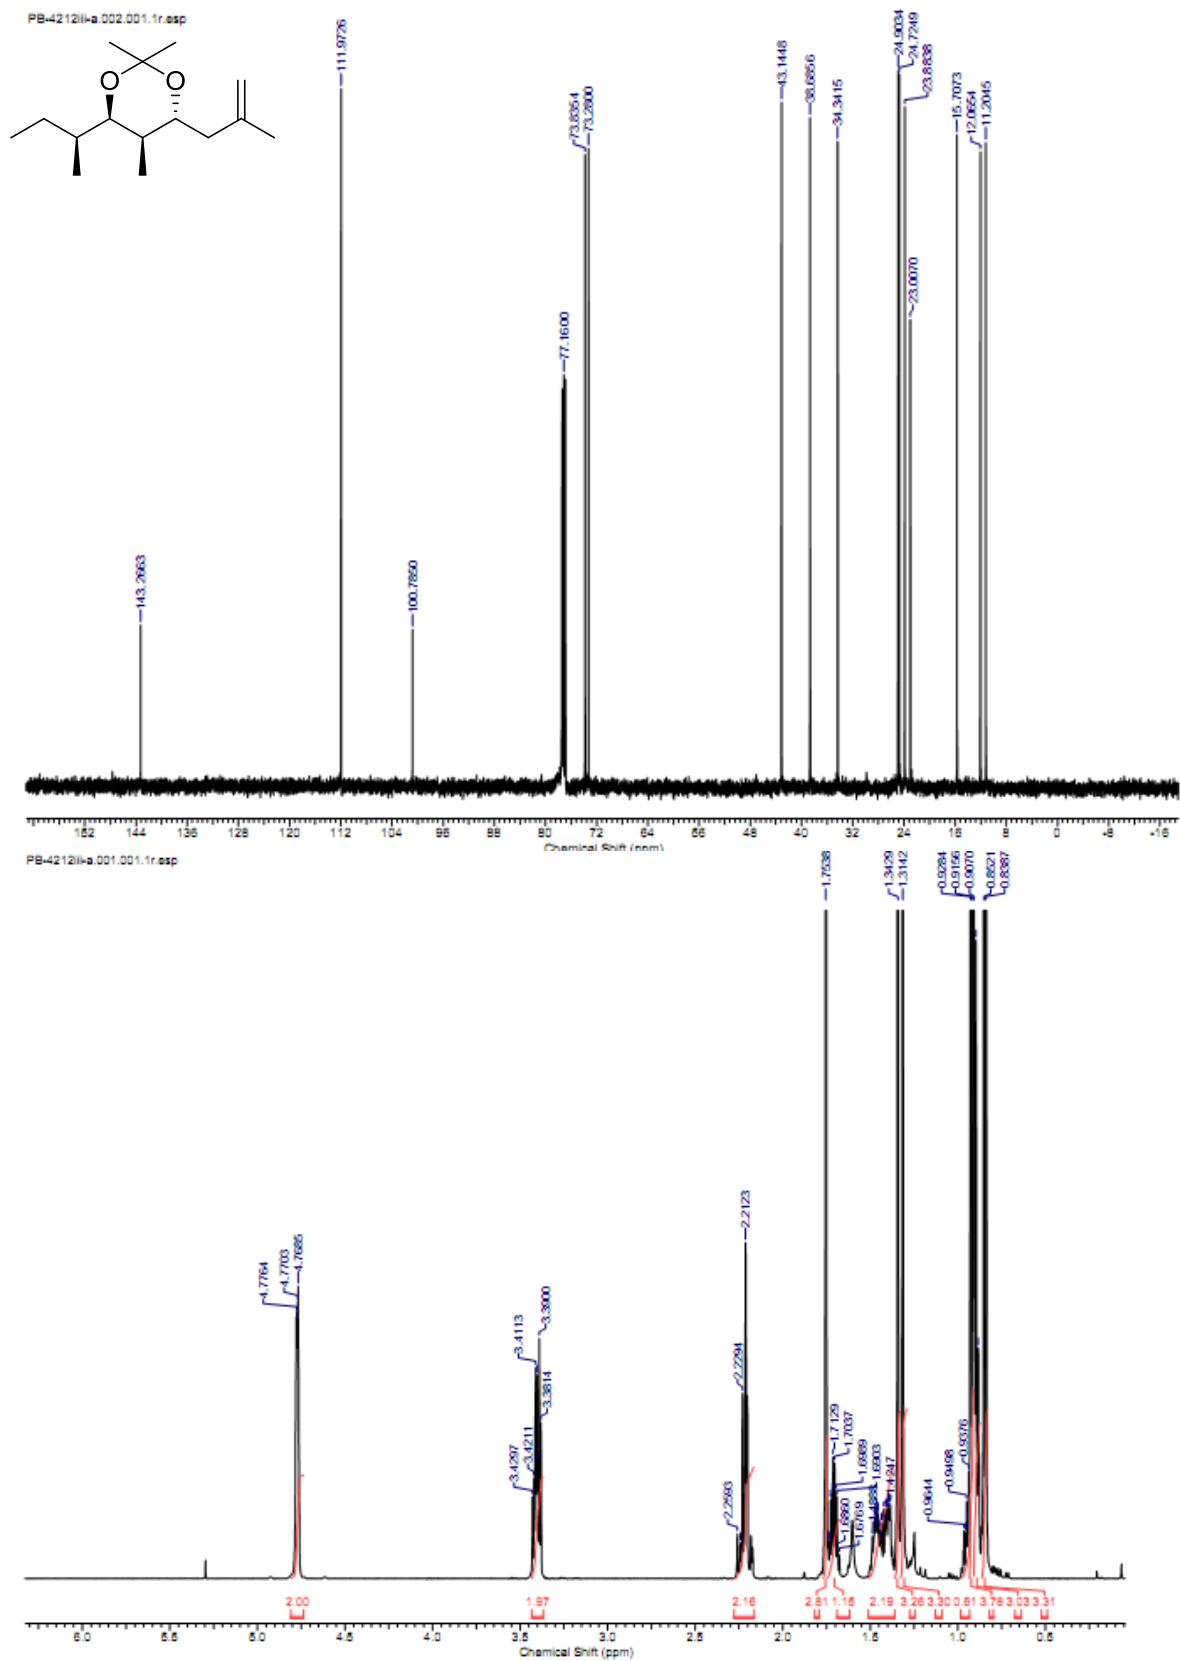

SI-22

PS-4227-a.002.001.1r.esp

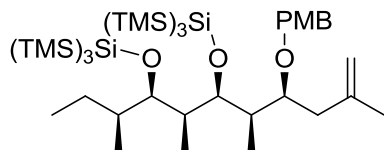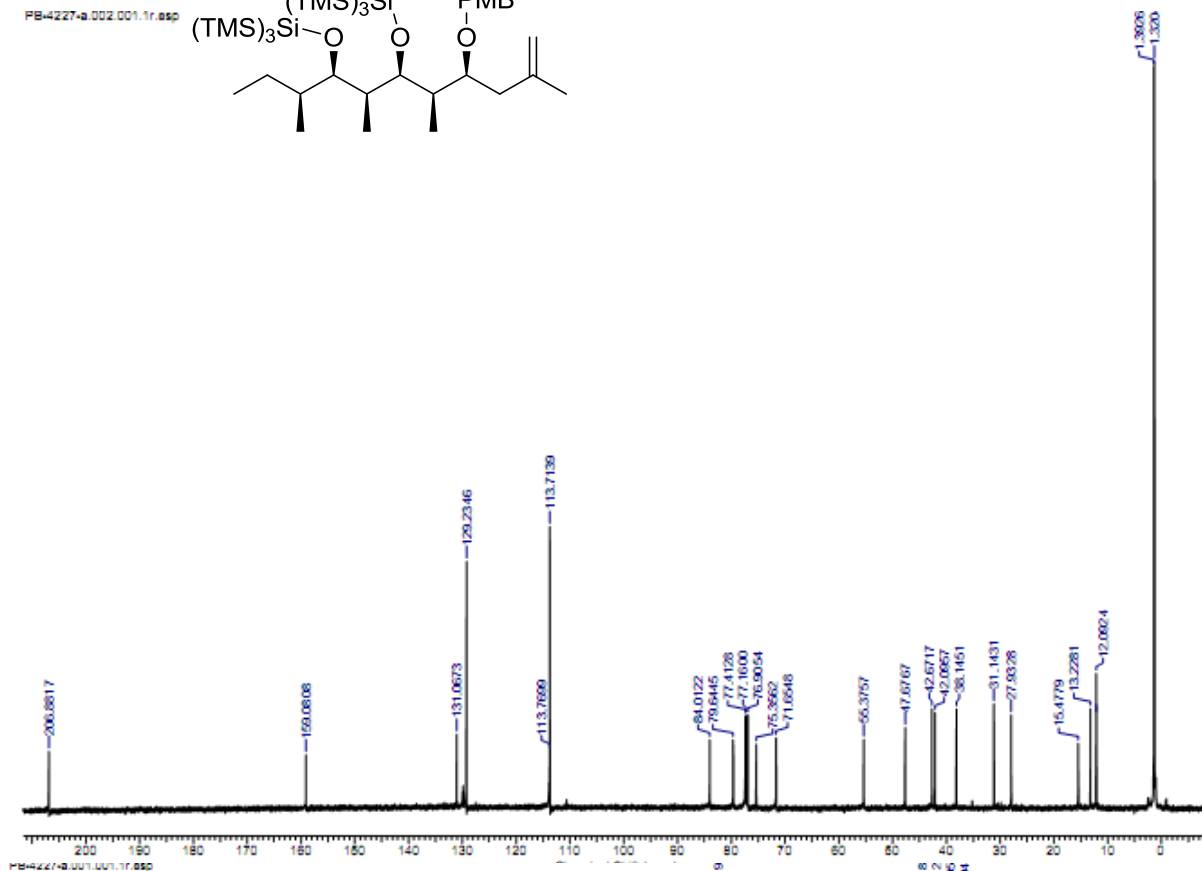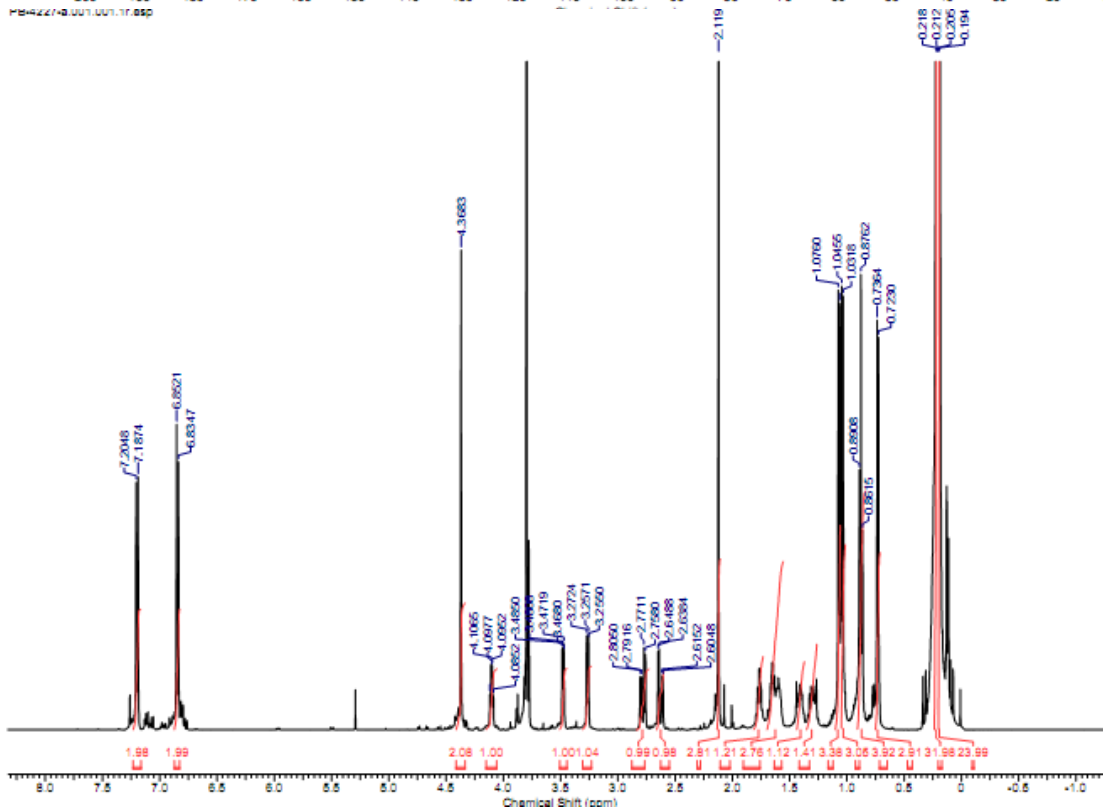

### SI-23

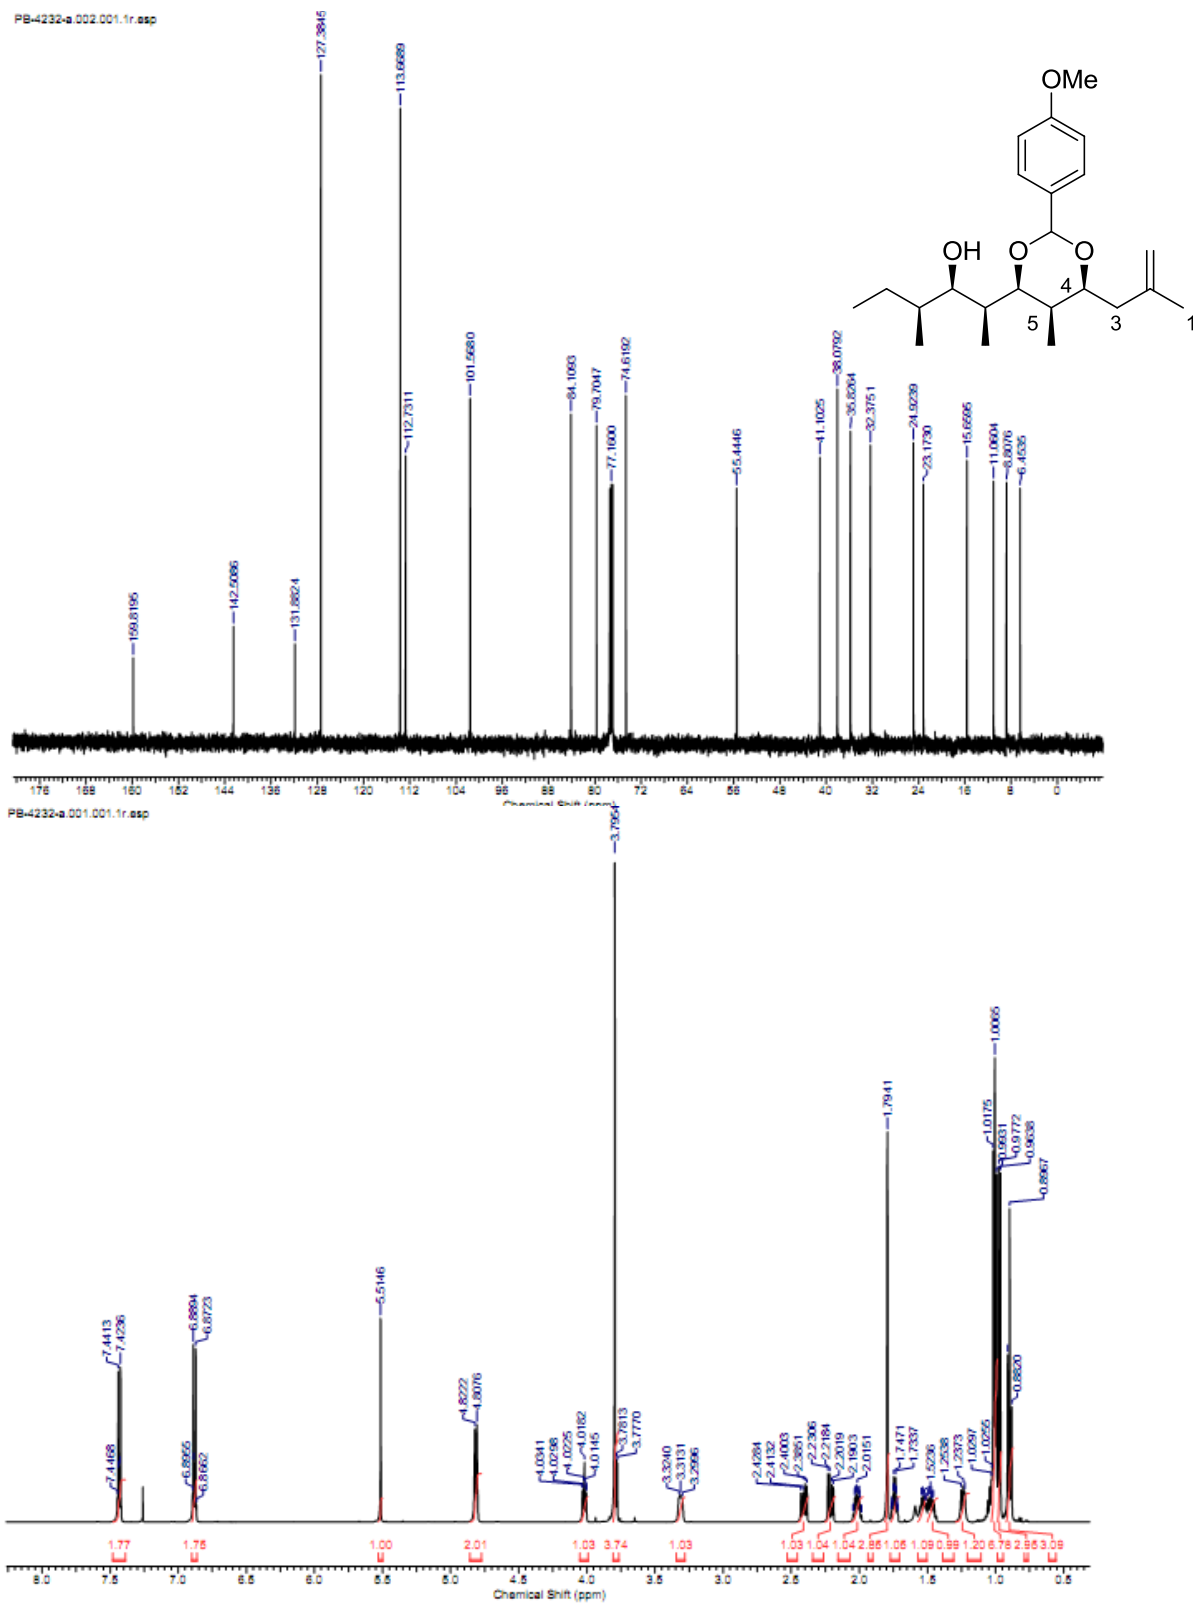

### COSY Spectrum of SI-23

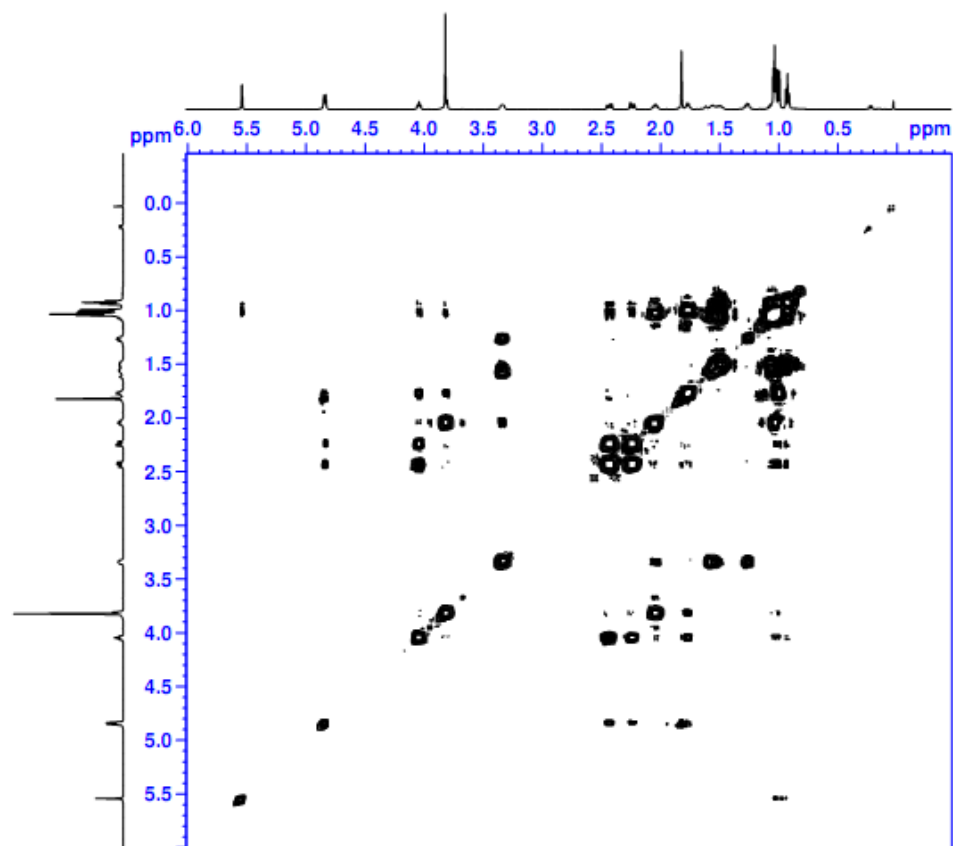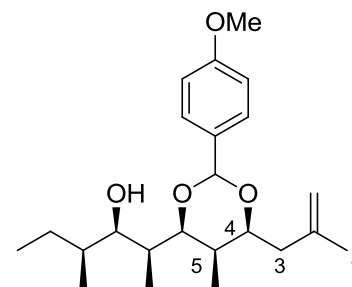

```
Current Data Parameters
NAME      72-4221-e2
EXPNO    4
PROCNO   1

F2 - Acquisition Parameters
Date_    20120422
Time     10.42
INSTRUM spect
PROBHD   5 mm BAKT 1H/
PULPROG zgpg30
TD        65536
SOLVENT  CDCl3
NS        2
DS        4
SWH       2324.342 Hz
FIDRES    1.561222 Hz
AQ        0.3162612 sec
RG         37.62
DM        154.400 usec
DC        10.00 usec
TE        300.2
DQ        0.0000000 sec
SFO       500.1300000 MHz
SI1       4.1070000 usec
SI2       0.0000000 usec
SI3       0.0000000 usec
SI4       0.0000000 usec
SI5       0.0000000 usec
SI6       0.0000000 usec
SI7       0.0000000 usec
SI8       0.0000000 usec
SI9       0.0000000 usec
SI10      0.0000000 usec
SI11      16.00 usec
SI12      12.00 usec
SI13      40.00 usec
SI14      1000.00 usec
P14       1000.00 usec

F1 - Acquisition parameters
TD        65536
SFO       500.1300000 MHz
SI1       4.1070000 usec
SI2       0.0000000 usec
SI3       0.0000000 usec
SI4       0.0000000 usec
SI5       0.0000000 usec
SI6       0.0000000 usec
SI7       0.0000000 usec
SI8       0.0000000 usec
SI9       0.0000000 usec
SI10      0.0000000 usec
SI11      16.00 usec
SI12      12.00 usec
SI13      40.00 usec
SI14      1000.00 usec

F2 - Processing parameters
SI        1024
SF         500.1300000 MHz
WDW       EM
SSB        0
GB         0
PC         1.40

F1 - Processing parameters
SI         1024
SF         500.1300000 MHz
WDW       EM
SSB        0
GB         0
PC         1.40
```

## NOESY SPECTRUM for SI-23

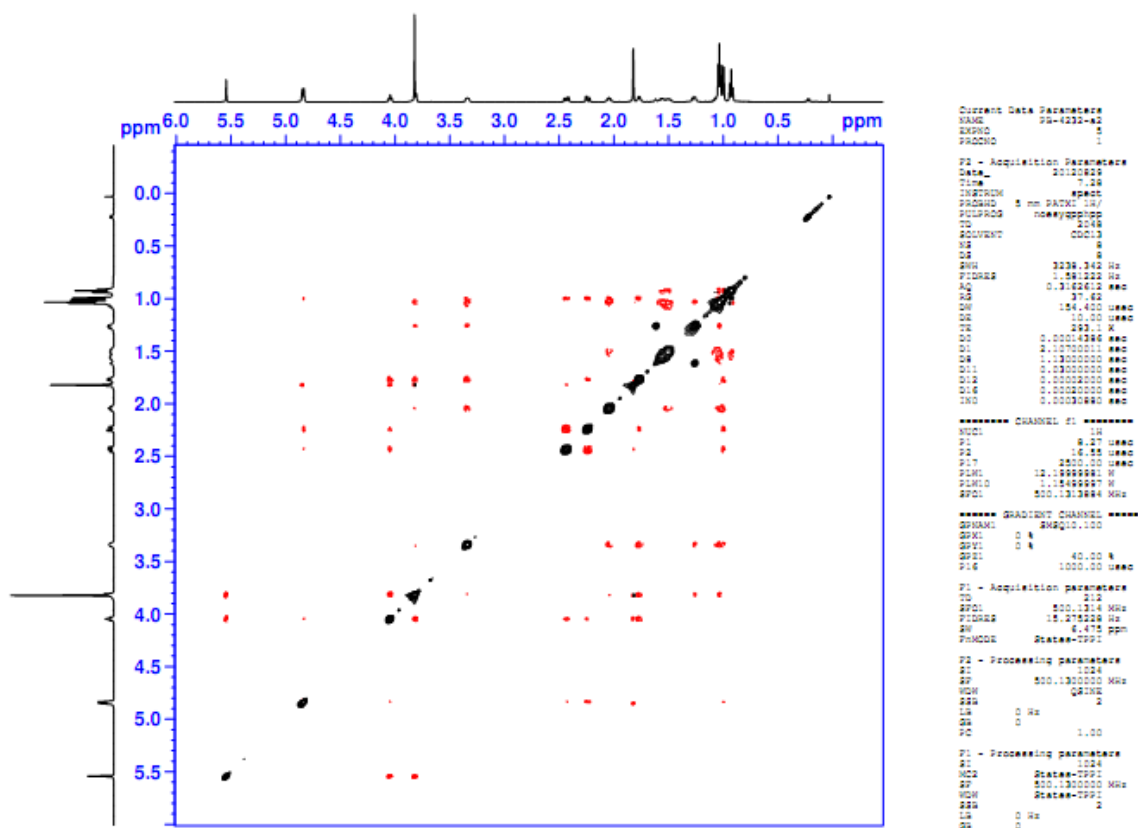

## Crystal Structure Report for Compound SI19

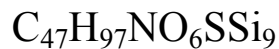

Report Prepared for:

Patrick Brady and Mr. H. Yamamoto

October, 2012



Ian Steele (steele@geosci.uchicago.edu)

X-ray Laboratory, Searle B013, 773-834-5861

Department of Chemistry

The University of Chicago

5735 S. Ellis Ave.

Chicago, Il 60637

## Crystallographic Experimental Section

### Data Collection

An irregular broken fragment (0.40 x 0.24 x 0.12 mm) was selected under a stereo-microscope while immersed in Fluorolube oil to avoid possible reaction with air. The crystal was removed from the oil using a tapered glass fiber that also served to hold the crystal for data collection. The crystal was mounted and centered on a Bruker SMART APEX system at 100 K. Rotation and still images showed the diffractions to be sharp. Frames separated in reciprocal space were obtained and provided an orientation matrix and initial cell parameters. Final cell parameters were obtained from the full data set.

A “full sphere” data set was obtained which samples approximately all of reciprocal space to a resolution of 0.75 Å using 0.3° steps in  $\omega$  using 10 second integration times for each frame. Data collection was made at 100 K. Integration of intensities and refinement of cell parameters were done using SAINT [1]. Absorption corrections were applied using SADABS [1] based on redundant diffractions.

### Structure solution and refinement

The space group was determined as P1( $\bar{1}$ ) based on systematic absences and intensity statistics. Direct methods were used to locate most Si atoms and some C atoms from the E-map. Repeated difference Fourier maps allowed recognition of all expected C, N, O and S atoms. Following anisotropic refinement of all non-H atoms, ideal H-atom positions were calculated. Final refinement was anisotropic for all non-H atoms, and isotropic-riding for H atoms. No anomalous bond lengths or thermal parameters were noted. All ORTEP diagrams have been drawn with 50% probability ellipsoids.

### Equations of interest:

$$R_{\text{int}} = \frac{\sum |F_o^2 - \langle F_o^2 \rangle|}{\sum |F_o^2|}$$

$$R1 = \frac{\sum ||F_o| - |F_c||}{\sum |F_o|}$$

$$wR2 = [\sum [w (F_o^2 - F_c^2)^2] / \sum [w (F_o^2)^2]]^{1/2}$$

$$\text{GooF} = S = [\sum [w (F_o^2 - F_c^2)^2] / (n-p)]^{1/2}$$

where:  $w = q / \sigma^2 (F_o^2) + (aP)^2 + bP$ ;

n = number of independent reflections;

q, a, b, P as defined in [1]

p = number of parameters refined.

### References

[1] All software and sources of scattering factors are contained in the SHELXTL (version 5.1) program library (G. Sheldrick, Bruker Analytical X-ray Systems, Madison, WI).

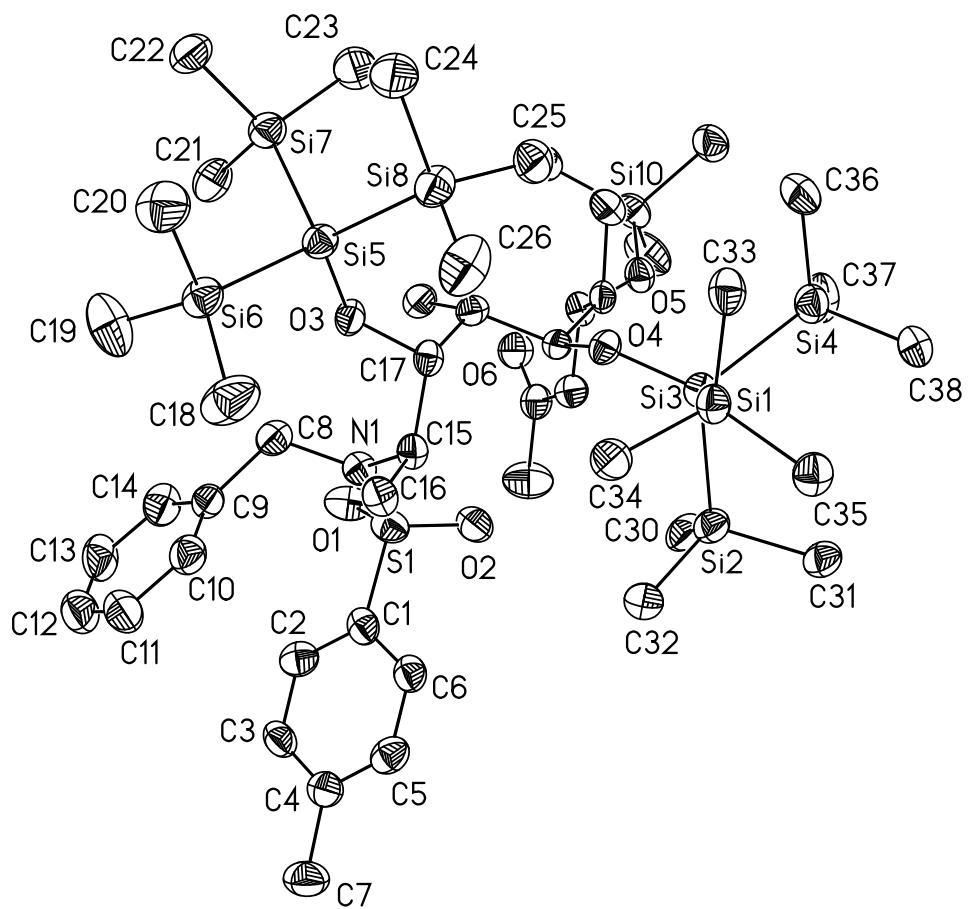

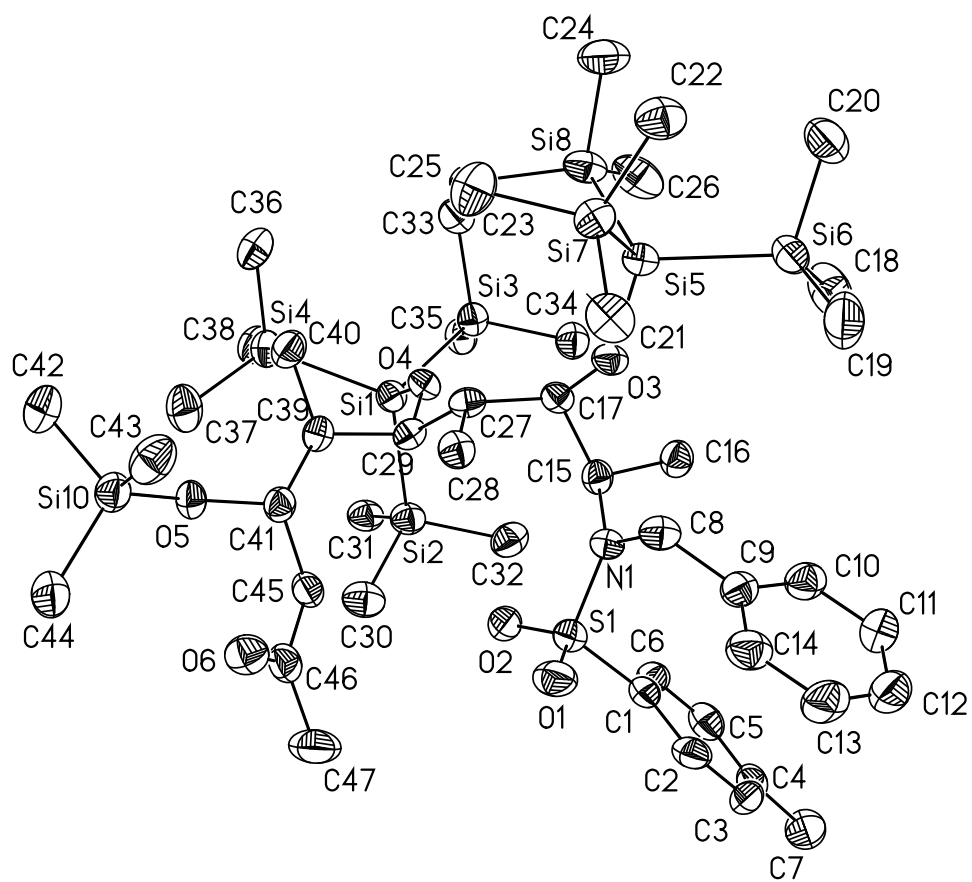

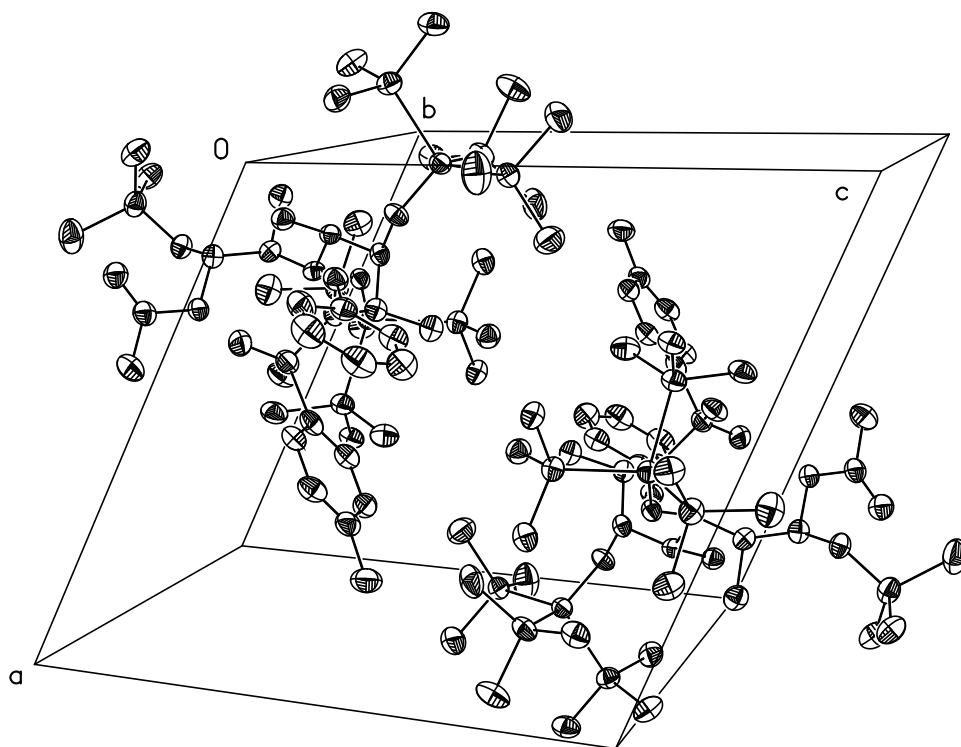

Table 1. Crystal and structure refinement for Brady11.

|                                       |                                                                                                                       |                             |
|---------------------------------------|-----------------------------------------------------------------------------------------------------------------------|-----------------------------|
| Identification Code                   | Brady11                                                                                                               |                             |
| Empirical formula                     | $C_{47}H_{97}NO_6SSi_9$                                                                                               |                             |
| Formula weight                        | 1057.13                                                                                                               |                             |
| Temperature                           | 100 K                                                                                                                 |                             |
| Wavelength                            | 0.71073 Å                                                                                                             |                             |
| Crystal system                        | Triclinic                                                                                                             |                             |
| Space Group                           | P1(bar)                                                                                                               |                             |
| Unit cell dimensions                  | $a = 13.583(4)$ Å                                                                                                     | $\alpha = 110.618(7)^\circ$ |
|                                       | $b = 15.995(5)$ Å                                                                                                     | $\beta = 111.892(6)^\circ$  |
|                                       | $c = 16.961(5)$ Å                                                                                                     | $\gamma = 93.200(6)^\circ$  |
| Volume                                | $3125.1(17)$ Å <sup>3</sup>                                                                                           |                             |
| Z                                     | 2                                                                                                                     |                             |
| Density (calculated)                  | 1.123 Mg/m <sup>3</sup>                                                                                               |                             |
| Absorption coefficient                | 0.265 mm <sup>-1</sup>                                                                                                |                             |
| F(000)                                | 1152                                                                                                                  |                             |
| Crystal size, color, habit            | 0.40 x 0.24 x 0.12 mm, transparent, irregular                                                                         |                             |
| Theta range for data collection       | 1.65 – 28.73 °                                                                                                        |                             |
| Index ranges                          | -18 ≤ h ≤ 18, -20 ≤ k ≤ 21, -22 ≤ l ≤ 22                                                                              |                             |
| Reflections collected                 | 37,882                                                                                                                |                             |
| Independent reflections               | 15,162 ( $R_{int} = 0.0395$ )                                                                                         |                             |
| Reflections with $I > 4\sigma(F_o)$   | 6,006                                                                                                                 |                             |
| Absorption correction                 | SADABS based on redundant diffractions                                                                                |                             |
| Max. and min. transmission            | 1.0, 0.773                                                                                                            |                             |
| Refinement method                     | Full-matrix least squares on $F^2$                                                                                    |                             |
| Weighting scheme                      | $w = q [\sigma^2 (F_o^2) + (aP)^2 + bP]^{-1}$ where:<br>$P = (F_o^2 + 2F_c^2)/3$ , $a = 0.0316$ , $b = 0.0$ , $q = 1$ |                             |
| Data / restraints / parameters        | 15162 / 0 / 603                                                                                                       |                             |
| Goodness-of-fit on $F^2$              | 0.726                                                                                                                 |                             |
| Final R indices [ $I > 2 \sigma(I)$ ] | R1 = 0.0691, wR2 = 0.1018                                                                                             |                             |
| R indices (all data)                  | R1 = 0.1620, wR2 = 0.1210                                                                                             |                             |
| Largest diff. peak and hole           | 0.473, -0.376 eÅ <sup>-3</sup>                                                                                        |                             |

Table 2. Atomic coordinates [ $\times 10^4$ ] and equivalent isotropic displacement parameters [ $\text{\AA}^2 \times 10^3$ ] for Bradyll.  $U(\text{eq})$  is defined as one third of the trace of the orthogonalized  $U_{ij}$  tensor.

|       | x        | y        | z        | U (eq) | SOF |
|-------|----------|----------|----------|--------|-----|
| C(1)  | 5089(3)  | 1144(3)  | 2777(3)  | 34(1)  |     |
| C(2)  | 5229(3)  | 315(3)   | 2816(3)  | 38(1)  |     |
| C(3)  | 6140(3)  | 266(3)   | 3518(3)  | 39(1)  |     |
| C(4)  | 6916(3)  | 1041(3)  | 4177(3)  | 37(1)  |     |
| C(5)  | 6744(3)  | 1866(3)  | 4134(3)  | 39(1)  |     |
| C(6)  | 5851(3)  | 1929(3)  | 3440(3)  | 35(1)  |     |
| C(7)  | 7916(3)  | 984(3)   | 4910(3)  | 51(1)  |     |
| C(8)  | 2274(3)  | 839(2)   | 2208(3)  | 35(1)  |     |
| C(9)  | 2746(3)  | 264(3)   | 2732(3)  | 34(1)  |     |
| C(10) | 3294(3)  | 623(3)   | 3685(3)  | 41(1)  |     |
| C(11) | 3683(3)  | 76(3)    | 4154(3)  | 48(1)  |     |
| C(12) | 3516(4)  | -849(3)  | 3665(3)  | 52(1)  |     |
| C(13) | 2954(3)  | -1218(3) | 2719(3)  | 52(1)  |     |
| C(14) | 2581(3)  | -668(3)  | 2261(3)  | 46(1)  |     |
| C(15) | 3077(3)  | 2535(2)  | 2675(2)  | 30(1)  |     |
| C(16) | 3437(3)  | 2854(2)  | 3713(2)  | 36(1)  |     |
| C(17) | 2020(3)  | 2823(2)  | 2237(2)  | 27(1)  |     |
| C(18) | 1664(3)  | 3099(3)  | 5011(3)  | 70(2)  |     |
| C(19) | 236(4)   | 1229(3)  | 3721(3)  | 68(2)  |     |
| C(20) | -729(3)  | 2869(3)  | 4305(3)  | 59(1)  |     |
| C(21) | -1199(3) | 597(2)   | 952(3)   | 45(1)  |     |
| C(22) | -2587(3) | 1727(3)  | 1743(3)  | 47(1)  |     |
| C(23) | -1843(3) | 2165(3)  | 433(3)   | 51(1)  |     |
| C(24) | -1233(3) | 4410(3)  | 2931(3)  | 58(1)  |     |
| C(25) | 212(3)   | 4552(2)  | 1974(3)  | 45(1)  |     |
| C(26) | 1173(3)  | 5053(3)  | 4076(3)  | 58(1)  |     |
| C(27) | 1634(3)  | 2688(2)  | 1217(2)  | 28(1)  |     |
| C(28) | 1244(3)  | 1683(2)  | 544(2)   | 34(1)  |     |
| C(29) | 2453(3)  | 3220(2)  | 1048(2)  | 27(1)  |     |
| C(30) | 5483(3)  | 3725(2)  | 1290(3)  | 44(1)  |     |
| C(31) | 6309(3)  | 5760(2)  | 2414(3)  | 39(1)  |     |
| C(32) | 5945(3)  | 4511(3)  | 3315(3)  | 44(1)  |     |
| C(33) | 2566(3)  | 6623(2)  | 3244(3)  | 40(1)  |     |
| C(34) | 3965(3)  | 5545(2)  | 4180(2)  | 41(1)  |     |
| C(35) | 4999(3)  | 7094(2)  | 3933(2)  | 39(1)  |     |
| C(36) | 1756(3)  | 5984(3)  | 681(3)   | 49(1)  |     |
| C(37) | 3147(3)  | 5115(3)  | -269(3)  | 54(1)  |     |
| C(38) | 4111(3)  | 6871(2)  | 1391(3)  | 44(1)  |     |
| C(39) | 2080(3)  | 3181(2)  | 65(2)    | 28(1)  |     |
| C(40) | 972(3)   | 3435(2)  | -260(2)  | 38(1)  |     |
| C(41) | 2118(3)  | 2329(2)  | -703(2)  | 31(1)  |     |
| C(42) | 555(3)   | 2981(2)  | -2884(3) | 47(1)  |     |
| C(43) | -72(3)   | 1268(3)  | -2649(3) | 52(1)  |     |
| C(44) | 1694(4)  | 1442(3)  | -3325(3) | 63(1)  |     |
| C(45) | 3163(3)  | 2001(2)  | -436(2)  | 33(1)  |     |
| C(46) | 3150(3)  | 1065(3)  | -1094(3) | 36(1)  |     |
| C(47) | 4193(3)  | 749(3)   | -810(3)  | 60(1)  |     |
| N(1)  | 3060(2)  | 1551(2)  | 2241(2)  | 29(1)  |     |



|         |           |          |           |        |
|---------|-----------|----------|-----------|--------|
| O (1)   | 3502 (2)  | 312 (2)  | 1165 (2)  | 46 (1) |
| O (2)   | 4358 (2)  | 1922 (2) | 1661 (2)  | 43 (1) |
| O (3)   | 1175 (2)  | 2373 (2) | 2353 (2)  | 31 (1) |
| O (4)   | 2704 (2)  | 4159 (2) | 1699 (2)  | 28 (1) |
| O (5)   | 1968 (2)  | 2556 (2) | -1478 (2) | 33 (1) |
| O (6)   | 2347 (2)  | 603 (2)  | -1777 (2) | 42 (1) |
| S (1)   | 3968 (1)  | 1216 (1) | 1869 (1)  | 36 (1) |
| Si (1)  | 3655 (1)  | 5036 (1) | 1939 (1)  | 30 (1) |
| Si (2)  | 5406 (1)  | 4722 (1) | 2234 (1)  | 36 (1) |
| Si (3)  | 3799 (1)  | 6116 (1) | 3370 (1)  | 32 (1) |
| Si (4)  | 3138 (1)  | 5752 (1) | 881 (1)   | 37 (1) |
| Si (5)  | 183 (1)   | 2723 (1) | 2645 (1)  | 30 (1) |
| Si (6)  | 372 (1)   | 2471 (1) | 3973 (1)  | 38 (1) |
| Si (7)  | -1440 (1) | 1770 (1) | 1396 (1)  | 36 (1) |
| Si (8)  | 116 (1)   | 4258 (1) | 2920 (1)  | 39 (1) |
| Si (10) | 1057 (1)  | 2047 (1) | -2554 (1) | 39 (1) |

---

Table 3. Bond lengths [Å] and angles [°] for Brady11.

|                        |           |                        |             |
|------------------------|-----------|------------------------|-------------|
| C (1) -C (2)           | 1.372 (5) | C (29) -C (39)         | 1.528 (4)   |
| C (1) -C (6)           | 1.380 (5) | C (30) -Si (2)         | 1.861 (4)   |
| C (1) -S (1)           | 1.761 (4) | C (31) -Si (2)         | 1.867 (4)   |
| C (2) -C (3)           | 1.390 (5) | C (32) -Si (2)         | 1.865 (4)   |
| C (3) -C (4)           | 1.378 (5) | C (33) -Si (3)         | 1.875 (4)   |
| C (4) -C (5)           | 1.374 (5) | C (34) -Si (3)         | 1.857 (3)   |
| C (4) -C (7)           | 1.495 (5) | C (35) -Si (3)         | 1.875 (3)   |
| C (5) -C (6)           | 1.378 (5) | C (36) -Si (4)         | 1.861 (4)   |
| C (8) -N (1)           | 1.488 (4) | C (37) -Si (4)         | 1.862 (4)   |
| C (8) -C (9)           | 1.505 (5) | C (38) -Si (4)         | 1.869 (4)   |
| C (9) -C (10)          | 1.377 (5) | C (39) -C (40)         | 1.530 (4)   |
| C (9) -C (14)          | 1.378 (5) | C (39) -C (41)         | 1.539 (4)   |
| C (10) -C (11)         | 1.381 (5) | C (41) -O (5)          | 1.430 (4)   |
| C (11) -C (12)         | 1.373 (5) | C (41) -C (45)         | 1.505 (4)   |
| C (12) -C (13)         | 1.370 (5) | C (42) -Si (10)        | 1.852 (4)   |
| C (13) -C (14)         | 1.369 (5) | C (43) -Si (10)        | 1.842 (4)   |
| C (15) -N (1)          | 1.480 (4) | C (44) -Si (10)        | 1.855 (4)   |
| C (15) -C (16)         | 1.514 (4) | C (45) -C (46)         | 1.513 (5)   |
| C (15) -C (17)         | 1.531 (4) | C (46) -O (6)          | 1.201 (4)   |
| C (17) -O (3)          | 1.431 (4) | C (46) -C (47)         | 1.496 (5)   |
| C (17) -C (27)         | 1.536 (4) | N (1) -S (1)           | 1.620 (3)   |
| C (18) -Si (6)         | 1.855 (4) | O (1) -S (1)           | 1.426 (3)   |
| C (19) -Si (6)         | 1.860 (4) | O (2) -S (1)           | 1.426 (2)   |
| C (20) -Si (6)         | 1.856 (4) | O (3) -Si (5)          | 1.662 (2)   |
| C (21) -Si (7)         | 1.858 (4) | O (4) -Si (1)          | 1.675 (2)   |
| C (22) -Si (7)         | 1.865 (4) | O (5) -Si (10)         | 1.637 (3)   |
| C (23) -Si (7)         | 1.862 (4) | Si (1) -Si (3)         | 2.3609 (16) |
| C (24) -Si (8)         | 1.869 (4) | Si (1) -Si (2)         | 2.3619 (17) |
| C (25) -Si (8)         | 1.869 (4) | Si (1) -Si (4)         | 2.3710 (16) |
| C (26) -Si (8)         | 1.861 (4) | Si (5) -Si (8)         | 2.3459 (17) |
| C (27) -C (28)         | 1.527 (4) | Si (5) -Si (6)         | 2.3498 (17) |
| C (27) -C (29)         | 1.533 (4) | Si (5) -Si (7)         | 2.3539 (16) |
| C (29) -O (4)          | 1.445 (4) |                        |             |
| C (2) -C (1) -C (6)    | 119.8 (4) | O (3) -C (17) -C (15)  | 108.9 (3)   |
| C (2) -C (1) -S (1)    | 120.7 (3) | O (3) -C (17) -C (27)  | 109.8 (3)   |
| C (6) -C (1) -S (1)    | 119.5 (3) | C (15) -C (17) -C (27) | 117.5 (3)   |
| C (1) -C (2) -C (3)    | 120.0 (4) | C (28) -C (27) -C (29) | 112.8 (3)   |
| C (4) -C (3) -C (2)    | 120.9 (4) | C (28) -C (27) -C (17) | 113.0 (3)   |
| C (5) -C (4) -C (3)    | 117.9 (4) | C (29) -C (27) -C (17) | 113.1 (3)   |
| C (5) -C (4) -C (7)    | 121.2 (4) | O (4) -C (29) -C (39)  | 109.5 (3)   |
| C (3) -C (4) -C (7)    | 120.9 (4) | O (4) -C (29) -C (27)  | 106.5 (3)   |
| C (4) -C (5) -C (6)    | 122.1 (4) | C (39) -C (29) -C (27) | 115.8 (3)   |
| C (5) -C (6) -C (1)    | 119.3 (4) | C (29) -C (39) -C (40) | 111.4 (3)   |
| N (1) -C (8) -C (9)    | 116.7 (3) | C (29) -C (39) -C (41) | 119.2 (3)   |
| C (10) -C (9) -C (14)  | 117.6 (4) | C (40) -C (39) -C (41) | 110.6 (3)   |
| C (10) -C (9) -C (8)   | 122.5 (4) | O (5) -C (41) -C (45)  | 108.4 (3)   |
| C (14) -C (9) -C (8)   | 119.8 (4) | O (5) -C (41) -C (39)  | 107.2 (3)   |
| C (9) -C (10) -C (11)  | 121.4 (4) | C (45) -C (41) -C (39) | 114.7 (3)   |
| C (12) -C (11) -C (10) | 119.7 (4) | C (41) -C (45) -C (46) | 116.0 (3)   |
| C (13) -C (12) -C (11) | 119.5 (4) | O (6) -C (46) -C (47)  | 122.9 (4)   |
| C (14) -C (13) -C (12) | 120.3 (4) | O (6) -C (46) -C (45)  | 122.0 (4)   |
| C (13) -C (14) -C (9)  | 121.5 (4) | C (47) -C (46) -C (45) | 115.1 (4)   |
| N (1) -C (15) -C (16)  | 111.2 (3) | C (15) -N (1) -C (8)   | 121.2 (3)   |
| N (1) -C (15) -C (17)  | 115.1 (3) | C (15) -N (1) -S (1)   | 121.0 (2)   |
| C (16) -C (15) -C (17) | 110.8 (3) | C (8) -N (1) -S (1)    | 117.6 (2)   |

|                   |            |                    |            |
|-------------------|------------|--------------------|------------|
| C(17)-O(3)-Si(5)  | 133.0(2)   | C(38)-Si(4)-Si(1)  | 109.11(13) |
| C(29)-O(4)-Si(1)  | 128.8(2)   | O(3)-Si(5)-Si(8)   | 114.92(10) |
| C(41)-O(5)-Si(10) | 129.3(2)   | O(3)-Si(5)-Si(6)   | 108.17(10) |
| O(1)-S(1)-O(2)    | 120.00(17) | Si(8)-Si(5)-Si(6)  | 109.62(6)  |
| O(1)-S(1)-N(1)    | 107.15(16) | O(3)-Si(5)-Si(7)   | 105.56(10) |
| O(2)-S(1)-N(1)    | 107.09(16) | Si(8)-Si(5)-Si(7)  | 109.49(6)  |
| O(1)-S(1)-C(1)    | 107.17(18) | Si(6)-Si(5)-Si(7)  | 108.87(6)  |
| O(2)-S(1)-C(1)    | 105.98(17) | C(18)-Si(6)-C(20)  | 106.06(19) |
| N(1)-S(1)-C(1)    | 109.14(16) | C(18)-Si(6)-C(19)  | 108.4(2)   |
| O(4)-Si(1)-Si(3)  | 102.80(10) | C(20)-Si(6)-C(19)  | 108.5(2)   |
| O(4)-Si(1)-Si(2)  | 114.58(10) | C(18)-Si(6)-Si(5)  | 115.05(15) |
| Si(3)-Si(1)-Si(2) | 105.35(6)  | C(20)-Si(6)-Si(5)  | 108.18(14) |
| O(4)-Si(1)-Si(4)  | 114.34(10) | C(19)-Si(6)-Si(5)  | 110.43(14) |
| Si(3)-Si(1)-Si(4) | 106.34(6)  | C(21)-Si(7)-C(23)  | 107.99(18) |
| Si(2)-Si(1)-Si(4) | 112.16(6)  | C(21)-Si(7)-C(22)  | 108.95(17) |
| C(30)-Si(2)-C(32) | 107.55(18) | C(23)-Si(7)-C(22)  | 108.47(18) |
| C(30)-Si(2)-C(31) | 108.15(17) | C(21)-Si(7)-Si(5)  | 108.21(13) |
| C(32)-Si(2)-C(31) | 108.51(17) | C(23)-Si(7)-Si(5)  | 110.77(13) |
| C(30)-Si(2)-Si(1) | 115.03(13) | C(22)-Si(7)-Si(5)  | 112.34(13) |
| C(32)-Si(2)-Si(1) | 110.10(13) | C(26)-Si(8)-C(24)  | 107.04(19) |
| C(31)-Si(2)-Si(1) | 107.33(12) | C(26)-Si(8)-C(25)  | 111.02(18) |
| C(34)-Si(3)-C(35) | 107.55(17) | C(24)-Si(8)-C(25)  | 107.83(18) |
| C(34)-Si(3)-C(33) | 108.29(17) | C(26)-Si(8)-Si(5)  | 111.95(14) |
| C(35)-Si(3)-C(33) | 106.90(17) | C(24)-Si(8)-Si(5)  | 107.12(14) |
| C(34)-Si(3)-Si(1) | 109.01(13) | C(25)-Si(8)-Si(5)  | 111.62(12) |
| C(35)-Si(3)-Si(1) | 112.63(13) | O(5)-Si(10)-C(43)  | 111.07(16) |
| C(33)-Si(3)-Si(1) | 112.28(12) | O(5)-Si(10)-C(42)  | 105.29(15) |
| C(36)-Si(4)-C(37) | 108.09(19) | C(43)-Si(10)-C(42) | 110.07(18) |
| C(36)-Si(4)-C(38) | 108.08(18) | O(5)-Si(10)-C(44)  | 110.49(17) |
| C(37)-Si(4)-C(38) | 105.35(18) | C(43)-Si(10)-C(44) | 111.6(2)   |
| C(36)-Si(4)-Si(1) | 110.07(13) | C(42)-Si(10)-C(44) | 108.08(18) |
| C(37)-Si(4)-Si(1) | 115.82(14) |                    |            |

---

Table 4. Anisotropic displacement parameters [ $\text{\AA}^2 \times 10^3$ ] for Bradyll.  
 The anisotropic displacement factor exponent takes the form:  
 $-2\pi^2[h^2a^2U_{11} + \dots + 2hka^*b^*U_{12}]$

|        | $U_{11}$ | $U_{22}$ | $U_{33}$ | $U_{23}$ | $U_{13}$ | $U_{12}$ |
|--------|----------|----------|----------|----------|----------|----------|
| C (1)  | 39 (3)   | 40 (3)   | 40 (3)   | 22 (2)   | 27 (2)   | 17 (2)   |
| C (2)  | 34 (3)   | 43 (3)   | 41 (3)   | 14 (2)   | 22 (2)   | 14 (2)   |
| C (3)  | 41 (3)   | 46 (3)   | 51 (3)   | 33 (3)   | 26 (2)   | 22 (2)   |
| C (4)  | 35 (3)   | 52 (3)   | 37 (3)   | 24 (2)   | 21 (2)   | 14 (2)   |
| C (5)  | 34 (3)   | 47 (3)   | 35 (3)   | 12 (2)   | 17 (2)   | 4 (2)    |
| C (6)  | 37 (3)   | 35 (3)   | 43 (3)   | 20 (2)   | 23 (2)   | 13 (2)   |
| C (7)  | 36 (3)   | 71 (3)   | 51 (3)   | 30 (3)   | 17 (2)   | 18 (2)   |
| C (8)  | 32 (2)   | 30 (2)   | 41 (3)   | 11 (2)   | 17 (2)   | 7 (2)    |
| C (9)  | 30 (2)   | 33 (3)   | 43 (3)   | 18 (2)   | 17 (2)   | 7 (2)    |
| C (10) | 39 (3)   | 37 (3)   | 52 (3)   | 20 (2)   | 22 (2)   | 10 (2)   |
| C (11) | 54 (3)   | 51 (3)   | 49 (3)   | 29 (3)   | 23 (3)   | 17 (3)   |
| C (12) | 55 (3)   | 54 (3)   | 69 (4)   | 38 (3)   | 33 (3)   | 22 (3)   |
| C (13) | 61 (3)   | 32 (3)   | 74 (4)   | 26 (3)   | 36 (3)   | 14 (2)   |
| C (14) | 49 (3)   | 38 (3)   | 58 (3)   | 18 (3)   | 30 (3)   | 12 (2)   |
| C (15) | 33 (2)   | 29 (2)   | 31 (2)   | 14 (2)   | 14 (2)   | 5 (2)    |
| C (16) | 42 (3)   | 32 (2)   | 33 (2)   | 14 (2)   | 15 (2)   | 7 (2)    |
| C (17) | 32 (2)   | 18 (2)   | 30 (2)   | 7 (2)    | 16 (2)   | 5 (2)    |
| C (18) | 44 (3)   | 112 (4)  | 44 (3)   | 27 (3)   | 15 (3)   | -1 (3)   |
| C (19) | 109 (4)  | 59 (3)   | 58 (3)   | 34 (3)   | 46 (3)   | 28 (3)   |
| C (20) | 57 (3)   | 80 (4)   | 51 (3)   | 27 (3)   | 32 (3)   | 20 (3)   |
| C (21) | 42 (3)   | 36 (3)   | 43 (3)   | 6 (2)    | 15 (2)   | -5 (2)   |
| C (22) | 32 (3)   | 45 (3)   | 60 (3)   | 20 (2)   | 19 (2)   | 4 (2)    |
| C (23) | 45 (3)   | 50 (3)   | 42 (3)   | 17 (2)   | 2 (2)    | -2 (2)   |
| C (24) | 50 (3)   | 54 (3)   | 91 (4)   | 38 (3)   | 41 (3)   | 27 (2)   |
| C (25) | 47 (3)   | 28 (2)   | 62 (3)   | 17 (2)   | 26 (2)   | 12 (2)   |
| C (26) | 67 (3)   | 35 (3)   | 61 (3)   | -2 (2)   | 39 (3)   | 1 (2)    |
| C (27) | 24 (2)   | 23 (2)   | 31 (2)   | 8 (2)    | 10 (2)   | 5 (2)    |
| C (28) | 31 (2)   | 36 (2)   | 34 (2)   | 13 (2)   | 13 (2)   | 4 (2)    |
| C (29) | 24 (2)   | 23 (2)   | 31 (2)   | 12 (2)   | 9 (2)    | 4 (2)    |
| C (30) | 32 (3)   | 43 (3)   | 57 (3)   | 17 (2)   | 22 (2)   | 3 (2)    |
| C (31) | 31 (2)   | 43 (3)   | 48 (3)   | 19 (2)   | 20 (2)   | 9 (2)    |
| C (32) | 36 (3)   | 45 (3)   | 52 (3)   | 25 (2)   | 16 (2)   | 11 (2)   |
| C (33) | 49 (3)   | 28 (2)   | 44 (3)   | 13 (2)   | 24 (2)   | 7 (2)    |
| C (34) | 41 (3)   | 44 (3)   | 37 (3)   | 18 (2)   | 16 (2)   | 8 (2)    |
| C (35) | 43 (3)   | 36 (3)   | 32 (2)   | 10 (2)   | 14 (2)   | 3 (2)    |
| C (36) | 51 (3)   | 51 (3)   | 50 (3)   | 32 (2)   | 15 (2)   | 15 (2)   |
| C (37) | 70 (3)   | 48 (3)   | 49 (3)   | 24 (2)   | 28 (3)   | 4 (2)    |
| C (38) | 46 (3)   | 43 (3)   | 49 (3)   | 29 (2)   | 18 (2)   | 9 (2)    |
| C (39) | 30 (2)   | 23 (2)   | 29 (2)   | 12 (2)   | 10 (2)   | 1 (2)    |
| C (40) | 42 (3)   | 35 (2)   | 36 (2)   | 18 (2)   | 13 (2)   | 12 (2)   |
| C (41) | 37 (2)   | 28 (2)   | 30 (2)   | 14 (2)   | 15 (2)   | 7 (2)    |
| C (42) | 48 (3)   | 45 (3)   | 39 (3)   | 20 (2)   | 7 (2)    | 5 (2)    |
| C (43) | 50 (3)   | 42 (3)   | 46 (3)   | 16 (2)   | 4 (2)    | 7 (2)    |
| C (44) | 90 (4)   | 67 (3)   | 42 (3)   | 27 (3)   | 31 (3)   | 38 (3)   |
| C (45) | 33 (2)   | 40 (3)   | 28 (2)   | 14 (2)   | 16 (2)   | 8 (2)    |
| C (46) | 39 (3)   | 43 (3)   | 35 (3)   | 19 (2)   | 21 (2)   | 8 (2)    |
| C (47) | 52 (3)   | 65 (3)   | 61 (3)   | 17 (3)   | 27 (3)   | 32 (3)   |
| N (1)  | 32 (2)   | 28 (2)   | 30 (2)   | 11 (2)   | 16 (2)   | 10 (2)   |

|         |        |        |        |        |        |        |
|---------|--------|--------|--------|--------|--------|--------|
| O (1)   | 44 (2) | 52 (2) | 34 (2) | 9 (2)  | 14 (2) | 21 (2) |
| O (2)   | 40 (2) | 60 (2) | 52 (2) | 37 (2) | 29 (2) | 24 (2) |
| O (3)   | 31 (2) | 27 (2) | 44 (2) | 17 (1) | 23 (1) | 8 (1)  |
| O (4)   | 29 (2) | 27 (2) | 30 (2) | 9 (1)  | 16 (1) | 5 (1)  |
| O (5)   | 40 (2) | 33 (2) | 28 (2) | 15 (1) | 15 (1) | 6 (1)  |
| O (6)   | 44 (2) | 33 (2) | 43 (2) | 11 (2) | 16 (2) | 7 (1)  |
| S (1)   | 36 (1) | 45 (1) | 34 (1) | 19 (1) | 18 (1) | 18 (1) |
| Si (1)  | 30 (1) | 29 (1) | 30 (1) | 12 (1) | 13 (1) | 5 (1)  |
| Si (2)  | 29 (1) | 38 (1) | 41 (1) | 16 (1) | 16 (1) | 7 (1)  |
| Si (3)  | 36 (1) | 28 (1) | 32 (1) | 11 (1) | 14 (1) | 4 (1)  |
| Si (4)  | 41 (1) | 38 (1) | 37 (1) | 18 (1) | 17 (1) | 6 (1)  |
| Si (5)  | 28 (1) | 29 (1) | 33 (1) | 11 (1) | 14 (1) | 7 (1)  |
| Si (6)  | 35 (1) | 45 (1) | 34 (1) | 14 (1) | 18 (1) | 7 (1)  |
| Si (7)  | 32 (1) | 34 (1) | 37 (1) | 13 (1) | 11 (1) | 4 (1)  |
| Si (8)  | 38 (1) | 31 (1) | 52 (1) | 13 (1) | 26 (1) | 10 (1) |
| Si (10) | 47 (1) | 37 (1) | 32 (1) | 14 (1) | 14 (1) | 12 (1) |

---

Table 5. Hydrogen coordinates [ $\times 10^4$ ] and isotropic displacement parameters [ $\text{\AA}^2 \times 10^3$ ] for Brady11.

|        | x     | y     | z    | U(eq) |
|--------|-------|-------|------|-------|
| H(2)   | 4704  | -226  | 2363 | 45    |
| H(3)   | 6228  | -310  | 3543 | 47    |
| H(5)   | 7257  | 2410  | 4597 | 47    |
| H(6)   | 5761  | 2507  | 3419 | 42    |
| H(7A)  | 7798  | 398   | 4959 | 77    |
| H(7B)  | 8077  | 1486  | 5506 | 77    |
| H(7C)  | 8529  | 1030  | 4743 | 77    |
| H(8A)  | 1834  | 425   | 1550 | 42    |
| H(8B)  | 1773  | 1146  | 2453 | 42    |
| H(10)  | 3406  | 1262  | 4027 | 49    |
| H(11)  | 4065  | 338   | 4811 | 58    |
| H(12)  | 3788  | -1230 | 3982 | 63    |
| H(13)  | 2823  | -1859 | 2379 | 62    |
| H(14)  | 2199  | -934  | 1604 | 55    |
| H(15)  | 3646  | 2871  | 2590 | 36    |
| H(16A) | 2885  | 2566  | 3833 | 53    |
| H(16B) | 3533  | 3521  | 3994 | 53    |
| H(16C) | 4128  | 2683  | 3983 | 53    |
| H(17)  | 2136  | 3492  | 2607 | 32    |
| H(18A) | 1772  | 3751  | 5132 | 105   |
| H(18B) | 2270  | 2859  | 4901 | 105   |
| H(18C) | 1633  | 3020  | 5550 | 105   |
| H(19A) | 293   | 1133  | 4275 | 102   |
| H(19B) | 814   | 1009  | 3547 | 102   |
| H(19C) | -473  | 892   | 3209 | 102   |
| H(20A) | -677  | 2753  | 4848 | 88    |
| H(20B) | -1435 | 2538  | 3787 | 88    |
| H(20C) | -656  | 3526  | 4456 | 88    |
| H(21A) | -935  | 391   | 1460 | 67    |
| H(21B) | -655  | 601   | 702  | 67    |
| H(21C) | -1880 | 179   | 460  | 67    |
| H(22A) | -2683 | 2349  | 2023 | 70    |
| H(22B) | -2425 | 1448  | 2195 | 70    |
| H(22C) | -3256 | 1361  | 1194 | 70    |
| H(23A) | -2475 | 1724  | -104 | 77    |
| H(23B) | -1238 | 2213  | 258  | 77    |
| H(23C) | -2027 | 2765  | 637  | 77    |
| H(24A) | -1329 | 4212  | 3387 | 86    |
| H(24B) | -1811 | 4043  | 2314 | 86    |
| H(24C) | -1266 | 5057  | 3098 | 86    |
| H(25A) | -332  | 4110  | 1372 | 67    |
| H(25B) | 940   | 4534  | 1992 | 67    |
| H(25C) | 79    | 5168  | 2064 | 67    |
| H(26A) | 1172  | 5686  | 4137 | 86    |
| H(26B) | 1888  | 4924  | 4135 | 86    |
| H(26C) | 1015  | 4970  | 4565 | 86    |
| H(27)  | 979   | 2962  | 1077 | 33    |
| H(28A) | 756   | 1633  | -74  | 51    |
| H(28B) | 853   | 1347  | 762  | 51    |

|         |      |      |       |    |
|---------|------|------|-------|----|
| H (28C) | 1870 | 1422 | 511   | 51 |
| H (29)  | 3132 | 2977 | 1199  | 32 |
| H (30A) | 5127 | 3781 | 697   | 66 |
| H (30B) | 5115 | 3159 | 1255  | 66 |
| H (30C) | 6246 | 3708 | 1420  | 66 |
| H (31A) | 7066 | 5699 | 2649  | 59 |
| H (31B) | 6224 | 6303 | 2864  | 59 |
| H (31C) | 6109 | 5822 | 1822  | 59 |
| H (32A) | 5412 | 4041 | 3275  | 65 |
| H (32B) | 6080 | 5078 | 3851  | 65 |
| H (32C) | 6625 | 4302 | 3387  | 65 |
| H (33A) | 1916 | 6132 | 2941  | 59 |
| H (33B) | 2504 | 6978 | 2867  | 59 |
| H (33C) | 2632 | 7025 | 3859  | 59 |
| H (34A) | 3900 | 5957 | 4735  | 61 |
| H (34B) | 4682 | 5391 | 4359  | 61 |
| H (34C) | 3400 | 4984 | 3873  | 61 |
| H (35A) | 4980 | 7553 | 4489  | 58 |
| H (35B) | 4973 | 7371 | 3497  | 58 |
| H (35C) | 5670 | 6869 | 4109  | 58 |
| H (36A) | 1691 | 6215 | 1273  | 74 |
| H (36B) | 1210 | 5417 | 252   | 74 |
| H (36C) | 1641 | 6441 | 413   | 74 |
| H (37A) | 2985 | 5490 | -632  | 80 |
| H (37B) | 2595 | 4544 | -602  | 80 |
| H (37C) | 3864 | 4976 | -180  | 80 |
| H (38A) | 3872 | 7190 | 976   | 65 |
| H (38B) | 4837 | 6762 | 1465  | 65 |
| H (38C) | 4134 | 7247 | 1998  | 65 |
| H (39)  | 2599 | 3692 | 124   | 33 |
| H (40A) | 398  | 2908 | -459  | 56 |
| H (40B) | 864  | 3608 | -781  | 56 |
| H (40C) | 943  | 3950 | 253   | 56 |
| H (41)  | 1503 | 1821 | -893  | 37 |
| H (42A) | 115  | 3248 | -2555 | 70 |
| H (42B) | 111  | 2736 | -3555 | 70 |
| H (42C) | 1175 | 3454 | -2717 | 70 |
| H (43A) | 209  | 797  | -2437 | 78 |
| H (43B) | -607 | 976  | -3297 | 78 |
| H (43C) | -417 | 1615 | -2262 | 78 |
| H (44A) | 2285 | 1877 | -3263 | 95 |
| H (44B) | 1148 | 1173 | -3970 | 95 |
| H (44C) | 1987 | 956  | -3148 | 95 |
| H (45A) | 3362 | 1994 | 185   | 39 |
| H (45B) | 3742 | 2451 | -381  | 39 |
| H (47A) | 4131 | 166  | -1299 | 89 |
| H (47B) | 4346 | 669  | -232  | 89 |
| H (47C) | 4786 | 1207 | -712  | 89 |

---

Table 6. Torsion angles [°] for Brady11.

|                         |           |                         |             |
|-------------------------|-----------|-------------------------|-------------|
| C(6)-C(1)-C(2)-C(3)     | -0.4(5)   | C(6)-C(1)-S(1)-N(1)     | -80.5(3)    |
| S(1)-C(1)-C(2)-C(3)     | 177.5(3)  | C(29)-O(4)-Si(1)-Si(3)  | -162.9(2)   |
| C(1)-C(2)-C(3)-C(4)     | -0.6(6)   | C(29)-O(4)-Si(1)-Si(2)  | -49.1(3)    |
| C(2)-C(3)-C(4)-C(5)     | 2.0(6)    | C(29)-O(4)-Si(1)-Si(4)  | 82.3(3)     |
| C(2)-C(3)-C(4)-C(7)     | -177.6(3) | O(4)-Si(1)-Si(2)-C(30)  | 56.43(17)   |
| C(3)-C(4)-C(5)-C(6)     | -2.4(6)   | Si(3)-Si(1)-Si(2)-C(30) | 168.65(14)  |
| C(7)-C(4)-C(5)-C(6)     | 177.1(3)  | Si(4)-Si(1)-Si(2)-C(30) | -76.08(15)  |
| C(4)-C(5)-C(6)-C(1)     | 1.5(6)    | O(4)-Si(1)-Si(2)-C(32)  | -65.26(17)  |
| C(2)-C(1)-C(6)-C(5)     | -0.1(5)   | Si(3)-Si(1)-Si(2)-C(32) | 46.96(15)   |
| S(1)-C(1)-C(6)-C(5)     | -178.0(3) | Si(4)-Si(1)-Si(2)-C(32) | 162.23(14)  |
| N(1)-C(8)-C(9)-C(10)    | 65.8(5)   | O(4)-Si(1)-Si(2)-C(31)  | 176.81(16)  |
| N(1)-C(8)-C(9)-C(14)    | -118.0(4) | Si(3)-Si(1)-Si(2)-C(31) | -70.97(14)  |
| C(14)-C(9)-C(10)-C(11)  | 1.2(6)    | Si(4)-Si(1)-Si(2)-C(31) | 44.30(14)   |
| C(8)-C(9)-C(10)-C(11)   | 177.5(3)  | O(4)-Si(1)-Si(3)-C(34)  | 49.75(16)   |
| C(9)-C(10)-C(11)-C(12)  | -0.6(6)   | Si(2)-Si(1)-Si(3)-C(34) | -70.57(14)  |
| C(10)-C(11)-C(12)-C(13) | -0.7(6)   | Si(4)-Si(1)-Si(3)-C(34) | 170.21(13)  |
| C(11)-C(12)-C(13)-C(14) | 1.3(7)    | O(4)-Si(1)-Si(3)-C(35)  | 169.03(15)  |
| C(12)-C(13)-C(14)-C(9)  | -0.7(6)   | Si(2)-Si(1)-Si(3)-C(35) | 48.71(14)   |
| C(10)-C(9)-C(14)-C(13)  | -0.6(6)   | Si(4)-Si(1)-Si(3)-C(35) | -70.51(14)  |
| C(8)-C(9)-C(14)-C(13)   | -176.9(4) | O(4)-Si(1)-Si(3)-C(33)  | -70.24(16)  |
| N(1)-C(15)-C(17)-O(3)   | 63.4(4)   | Si(2)-Si(1)-Si(3)-C(33) | 169.44(13)  |
| C(16)-C(15)-C(17)-O(3)  | -63.8(4)  | Si(4)-Si(1)-Si(3)-C(33) | 50.22(14)   |
| N(1)-C(15)-C(17)-C(27)  | -62.1(4)  | O(4)-Si(1)-Si(4)-C(36)  | 47.55(18)   |
| C(16)-C(15)-C(17)-C(27) | 170.6(3)  | Si(3)-Si(1)-Si(4)-C(36) | -65.15(15)  |
| O(3)-C(17)-C(27)-C(28)  | -55.4(4)  | Si(2)-Si(1)-Si(4)-C(36) | -179.82(14) |
| C(15)-C(17)-C(27)-C(28) | 69.8(4)   | O(4)-Si(1)-Si(4)-C(37)  | -75.40(18)  |
| O(3)-C(17)-C(27)-C(29)  | 174.9(3)  | Si(3)-Si(1)-Si(4)-C(37) | 171.89(15)  |
| C(15)-C(17)-C(27)-C(29) | -60.0(4)  | Si(2)-Si(1)-Si(4)-C(37) | 57.22(16)   |
| C(28)-C(27)-C(29)-O(4)  | 177.2(3)  | O(4)-Si(1)-Si(4)-C(38)  | 165.99(16)  |
| C(17)-C(27)-C(29)-O(4)  | -53.0(4)  | Si(3)-Si(1)-Si(4)-C(38) | 53.28(15)   |
| C(28)-C(27)-C(29)-C(39) | 55.2(4)   | Si(2)-Si(1)-Si(4)-C(38) | -61.39(15)  |
| C(17)-C(27)-C(29)-C(39) | -175.0(3) | C(17)-O(3)-Si(5)-Si(8)  | 0.5(3)      |
| O(4)-C(29)-C(39)-C(40)  | -68.9(4)  | C(17)-O(3)-Si(5)-Si(6)  | -122.4(3)   |
| C(27)-C(29)-C(39)-C(40) | 51.5(4)   | C(17)-O(3)-Si(5)-Si(7)  | 121.2(3)    |
| O(4)-C(29)-C(39)-C(41)  | 160.4(3)  | O(3)-Si(5)-Si(6)-C(18)  | 61.2(2)     |
| C(27)-C(29)-C(39)-C(41) | -79.2(4)  | Si(8)-Si(5)-Si(6)-C(18) | -64.79(18)  |
| C(29)-C(39)-C(41)-O(5)  | -167.1(3) | Si(7)-Si(5)-Si(6)-C(18) | 175.46(17)  |
| C(40)-C(39)-C(41)-O(5)  | 61.9(4)   | O(3)-Si(5)-Si(6)-C(20)  | 179.56(17)  |
| C(29)-C(39)-C(41)-C(45) | -46.7(4)  | Si(8)-Si(5)-Si(6)-C(20) | 53.56(16)   |
| C(40)-C(39)-C(41)-C(45) | -177.7(3) | Si(7)-Si(5)-Si(6)-C(20) | -66.19(16)  |
| O(5)-C(41)-C(45)-C(46)  | -72.2(4)  | O(3)-Si(5)-Si(6)-C(19)  | -61.80(19)  |
| C(39)-C(41)-C(45)-C(46) | 168.1(3)  | Si(8)-Si(5)-Si(6)-C(19) | 172.19(16)  |
| C(41)-C(45)-C(46)-O(6)  | -1.6(5)   | Si(7)-Si(5)-Si(6)-C(19) | 52.44(17)   |
| C(41)-C(45)-C(46)-C(47) | -179.3(3) | O(3)-Si(5)-Si(7)-C(21)  | 37.67(16)   |
| C(16)-C(15)-N(1)-C(8)   | 66.7(4)   | Si(8)-Si(5)-Si(7)-C(21) | 161.91(13)  |
| C(17)-C(15)-N(1)-C(8)   | -60.3(4)  | Si(6)-Si(5)-Si(7)-C(21) | -78.26(14)  |
| C(16)-C(15)-N(1)-S(1)   | -107.6(3) | O(3)-Si(5)-Si(7)-C(23)  | -80.53(17)  |
| C(17)-C(15)-N(1)-S(1)   | 125.4(3)  | Si(8)-Si(5)-Si(7)-C(23) | 43.71(16)   |
| C(9)-C(8)-N(1)-C(15)    | -116.3(4) | Si(6)-Si(5)-Si(7)-C(23) | 163.54(15)  |
| C(9)-C(8)-N(1)-S(1)     | 58.2(4)   | O(3)-Si(5)-Si(7)-C(22)  | 158.00(16)  |
| C(15)-C(17)-O(3)-Si(5)  | 137.5(3)  | Si(8)-Si(5)-Si(7)-C(22) | -77.77(14)  |
| C(27)-C(17)-O(3)-Si(5)  | -92.5(3)  | Si(6)-Si(5)-Si(7)-C(22) | 42.06(15)   |
| C(39)-C(29)-O(4)-Si(1)  | -62.3(4)  | O(3)-Si(5)-Si(8)-C(26)  | -77.22(18)  |
| C(27)-C(29)-O(4)-Si(1)  | 171.7(2)  | Si(6)-Si(5)-Si(8)-C(26) | 44.83(15)   |
| C(45)-C(41)-O(5)-Si(10) | 111.6(3)  | Si(7)-Si(5)-Si(8)-C(26) | 164.20(14)  |
| C(39)-C(41)-O(5)-Si(10) | -124.0(3) | O(3)-Si(5)-Si(8)-C(24)  | 165.73(18)  |
| C(15)-N(1)-S(1)-O(1)    | -155.4(2) | Si(6)-Si(5)-Si(8)-C(24) | -72.21(16)  |
| C(8)-N(1)-S(1)-O(1)     | 30.1(3)   | Si(7)-Si(5)-Si(8)-C(24) | 47.16(16)   |
| C(15)-N(1)-S(1)-O(2)    | -25.4(3)  | O(3)-Si(5)-Si(8)-C(25)  | 47.92(18)   |
| C(8)-N(1)-S(1)-O(2)     | 160.1(2)  | Si(6)-Si(5)-Si(8)-C(25) | 169.97(14)  |
| C(15)-N(1)-S(1)-C(1)    | 88.9(3)   | Si(7)-Si(5)-Si(8)-C(25) | -70.66(15)  |
| C(8)-N(1)-S(1)-C(1)     | -85.6(3)  | C(41)-O(5)-Si(10)-C(43) | 15.7(3)     |
| C(2)-C(1)-S(1)-O(1)     | -14.1(3)  | C(41)-O(5)-Si(10)-C(42) | 134.8(3)    |
| C(6)-C(1)-S(1)-O(1)     | 163.8(3)  | C(41)-O(5)-Si(10)-C(44) | -108.7(3)   |
| C(2)-C(1)-S(1)-O(2)     | -143.4(3) |                         |             |
| C(6)-C(1)-S(1)-O(2)     | 34.5(3)   |                         |             |
| C(2)-C(1)-S(1)-N(1)     | 101.6(3)  |                         |             |
